# Supplementary material for: Developmental, chemical and transcriptional characteristics of artificially pollinated and hormone-induced parthenocarpic fruits of Siraitia grosvenorii
Source: Royal Society of Chemistry journal article supplement (doi:10.1039/c6ra28341a), 2017-01-01
Supplement: c6ra28341a1.pdf [file c6ra28341a1.pdf]

Electronic Supplementary Information

## Developmental, chemical and transcriptional characteristics of artificially pollinated and hormone-induced parthenocarpic fruits of *Siraitia grosvenorii*

Dongping Tu<sup>1,2,†</sup>, Zuliang Luo<sup>1,†</sup>, Bin Wu<sup>1</sup>, Xiaojun Ma<sup>1,\*</sup>, Hongwu Shi<sup>1</sup>, Changming Mo<sup>3</sup>, Jie Huang<sup>3</sup> and Wenjuan Xie<sup>4</sup>

<sup>1</sup> Institute of Medicinal Plant Development, Chinese Academy of Medical Sciences & Peking Union Medical College, Beijing 100193, China

<sup>2</sup> Guangxi University of Chinese Medicine, Nanning 530200, China

<sup>3</sup> Guangxi Botanical Garden of Medicinal Plants, Nanning 530023, China

<sup>4</sup> Guilin Medical University, Guilin 541004, China

<sup>†</sup> Both authors contributed equally to this work

<sup>\*</sup> Corresponding author E-mail: mayixuan10@163.com

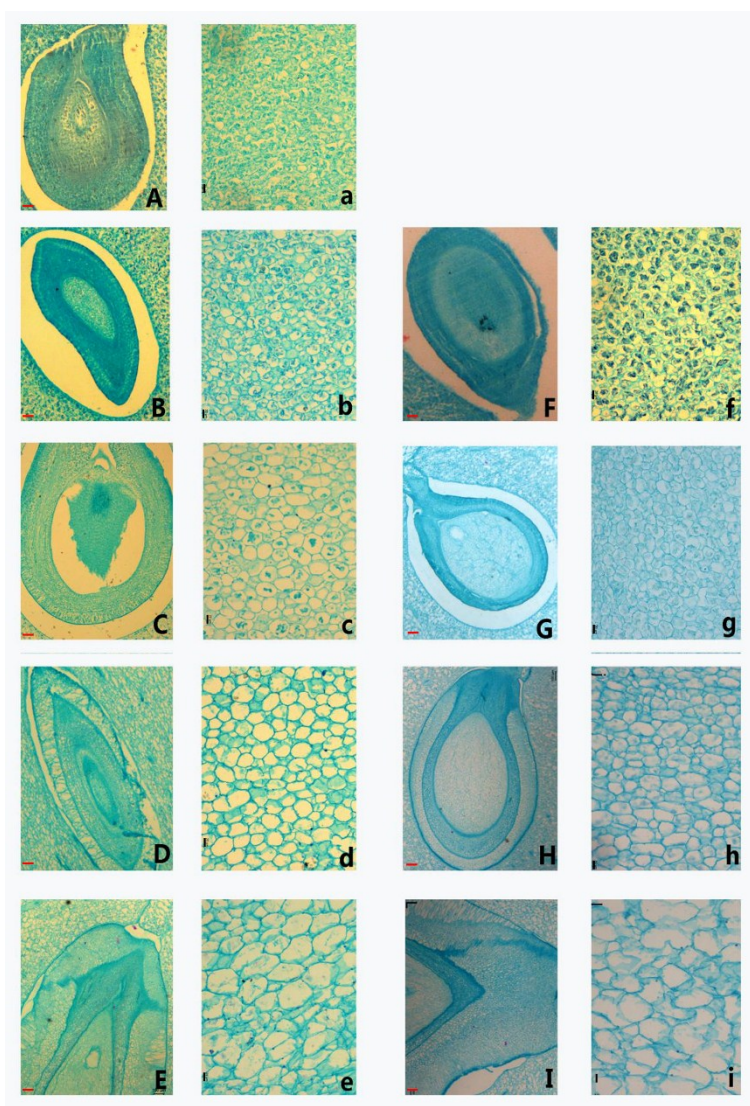

**Supplementary Figure S1.** Cytological observations of *S. grosvenorii* ovaries during early developmental stages. A, a: 0 DAA; B, b: H 1 DAA; C, c: H 3 DAA; D, d: H 5 DAA; E, e: H 10 DAA; F, f: P 1 DAA; G, g: P 3 DAA; H, h: P 5 DAA; I, i: P 10 DAA. H, hormone treated; P, pollinated. (A-I) The process of embryo development, red scale bar = 100  $\mu$ m. (a-i) Characteristics of pulp cells, black scale bar = 25  $\mu$ m.

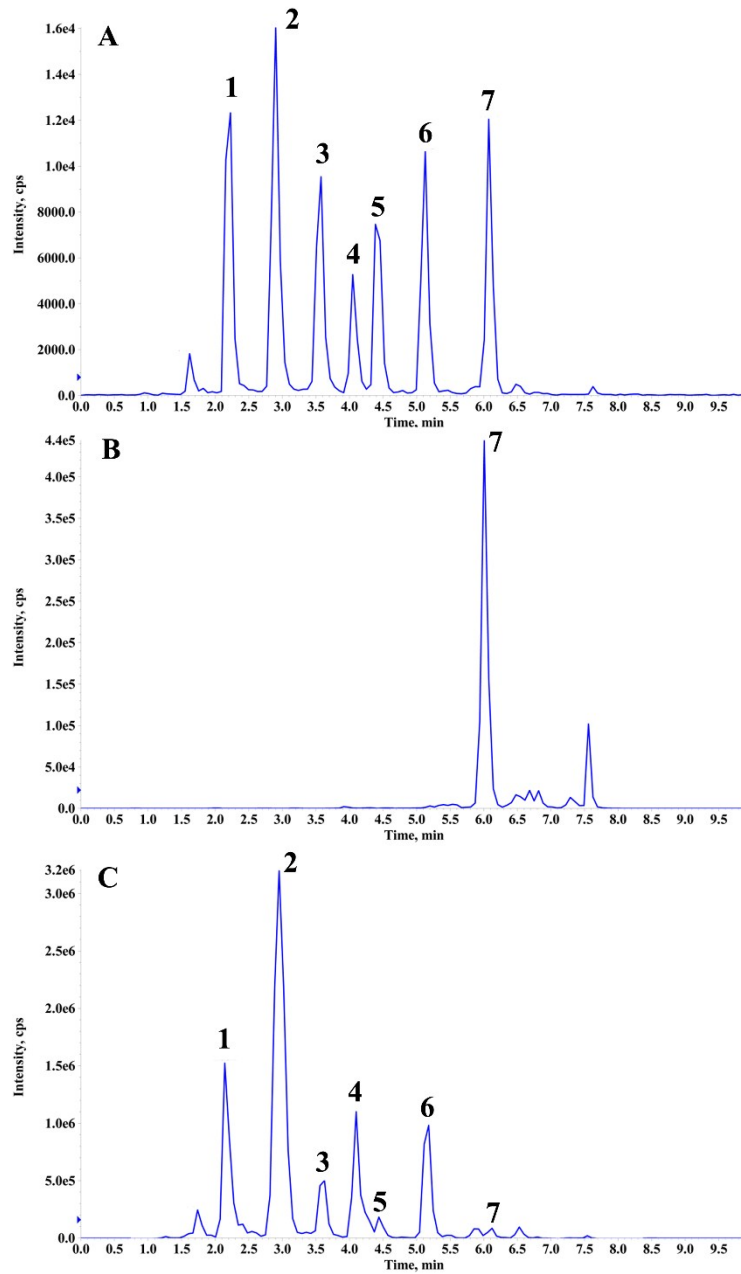

**Supplementary Figure S2.** Typical LC–MS/MS total ion chromatograms (TICs) of (A) standard solutions of seven mogrosides, (B) a pollinated sample at 5 DAA, and (C) a pollinated sample at 70 DAA. Peaks: 1. OMV, 2. MV, 3. IMV, 4. SI, 5. MIVA, 6. MIV, and 7. MIII.

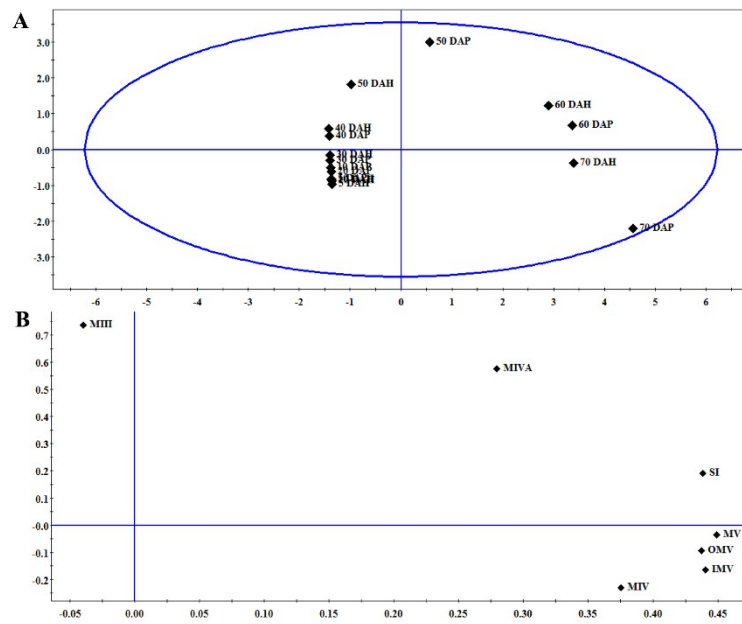

**Supplementary Figure S3.** PCA score plot of *S. grosvenorii* fruit samples collected at different growing stages (A), and (B) loading plot obtained using Pareto scaling with mean centering. DAH, days after hormone treatment; DAP, days after pollination.

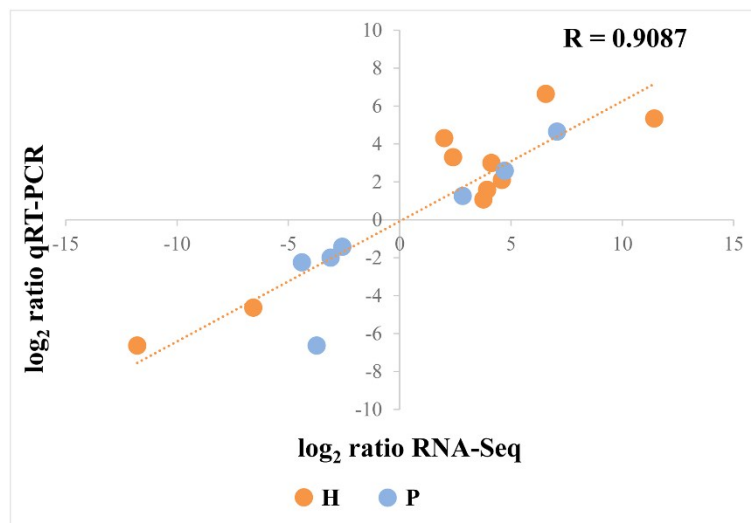

**Supplementary Figure S4.** The correlation between qRT-PCR and RNA-Seq. The X-axis indicates the  $\log_2$  value of the fold change from RNA-Seq. The Y-axis represents  $\log_2$  fold change of the qRT-PCR. The pollinated (P) and hormone-treated (H) ovaries were represented by points with different color.

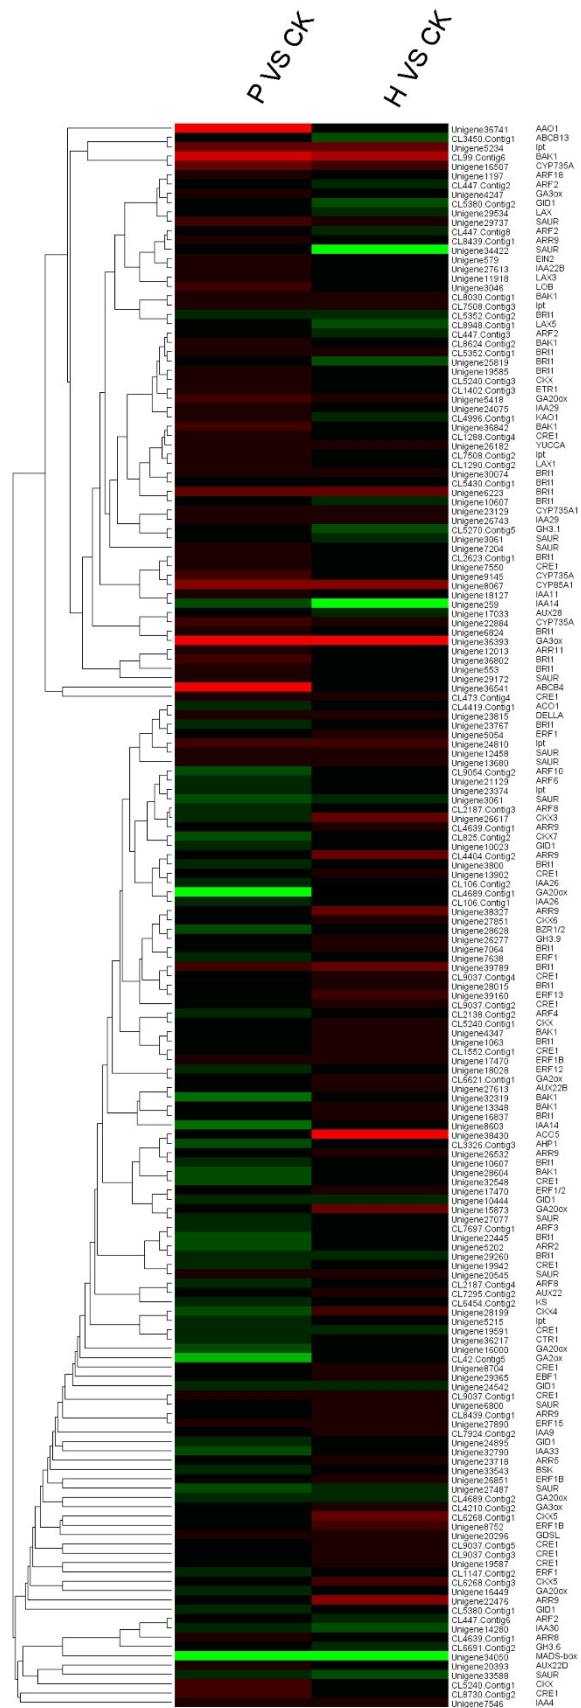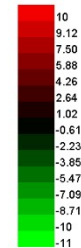

**Supplementary Figure S5.** Cluster analysis of known genes associated with hormone biosynthesis and signaling in *S. grosvenorii* fruits. CK, untreated; H, hormone-treated; P, pollinated.

**Supplementary Table S1.** Optimized MS parameters for the seven mogrosides.

| Analytes                | Molecular formula                                | m/z precursor | m/z Productions            | Ion ratio | DP (V) | CE (eV) |
|-------------------------|--------------------------------------------------|---------------|----------------------------|-----------|--------|---------|
| OMV                     | C <sub>60</sub> H <sub>100</sub> O <sub>29</sub> | 1283.7        | 1121.6 <sup>a</sup> /959.5 | 1.42      | -220   | -85     |
| MV                      | C <sub>60</sub> H <sub>102</sub> O <sub>29</sub> | 1285.4        | 1123.5 <sup>a</sup> /961.4 | 2.00      | -210   | -85     |
| IMV                     | C <sub>60</sub> H <sub>102</sub> O <sub>29</sub> | 1285.4        | 1123.5 <sup>a</sup> /961.4 | 1.29      | -210   | -85     |
| SI                      | C <sub>54</sub> H <sub>92</sub> O <sub>24</sub>  | 1123.4        | 961.6 <sup>a</sup> /799.2  | 2.13      | -220   | -75     |
| MIVA                    | C <sub>54</sub> H <sub>92</sub> O <sub>24</sub>  | 1123.4        | 961.6 <sup>a</sup> /799.2  | 1.78      | -220   | -75     |
| MIV                     | C <sub>54</sub> H <sub>92</sub> O <sub>24</sub>  | 1123.4        | 961.6 <sup>a</sup> /799.2  | 2.36      | -220   | -75     |
| MIII                    | C <sub>48</sub> H <sub>82</sub> O <sub>19</sub>  | 961.4         | 799.5 <sup>a</sup> /637.2  | 4.00      | -170   | -70     |
| Source temperature (°C) |                                                  |               |                            | 500       |        |         |
| Ionization voltage (V)  |                                                  |               |                            | -4500     |        |         |
| GS1 (psi)               |                                                  |               |                            | 50        |        |         |
| GS2 (psi)               |                                                  |               |                            | 40        |        |         |
| CUR (psi)               |                                                  |               |                            | 15        |        |         |
| CAD <sup>b</sup>        |                                                  |               |                            | high      |        |         |
| Dwell time (ms)         |                                                  |               |                            | 400       |        |         |
| EP (V)                  |                                                  |               |                            | -10       |        |         |
| CXP (V)                 |                                                  |               |                            | -15       |        |         |

<sup>a</sup> Product ion used for quantification. <sup>b</sup> Collision activation dissociation

**Supplementary Table S2.** Validation of differential expression genes by qRT-PCR. A, Sequences of primers used for qRT-PCR; B, Validation of differential expression genes by qRT-PCR.

| A. Sequences of primers used for qRT-PCR |              |                  |                            |                              |
|------------------------------------------|--------------|------------------|----------------------------|------------------------------|
| NO.                                      | unigene      | gene name        | sequences of primers       |                              |
| 1                                        | Unigene8603  | <i>AUX/IAA14</i> | F: GCCACCAAGTGCATCCTACA    | R: TCCGTCCATGCAAACCTTTA      |
| 2                                        | Unigene24810 | <i>ipt</i>       | F: TAACGAAGAGGCAGTTGGGAAAG | R: TTATGCTTGGTTGCACCACTTGT   |
| 3                                        | Unigene28199 | <i>CKX-4</i>     | F: GCTCCGAAACGACCACTCT     | R: GCGTAGGGACCCAACGAAC       |
| 4                                        | Unigene26617 | <i>CKX-3</i>     | F: TCAACATAGCCGCCAAAGGT    | R: TGAGCACGTCAATCCACAGC      |
| 5                                        | Unigene16507 | <i>CYP735A</i>   | F: AAAGCAGCTACGAAAAGGGAAAG | R: AAAACGGTGAGCAAATGGAAAA    |
| 6                                        | Unigene26532 | <i>ARR9</i>      | F: TGCCTGGGATGACTGGCTATGAT | R: TCGTCAATGGCGGCTGAATGAGT   |
| 7                                        | Unigene23718 | <i>ARR5</i>      | F: TGGAGAAGATAGAGGGAAGAGGA | R: GACGACGGAGGAGATAGTTGCAGAA |
| 8                                        | Unigene5202  | <i>ARR2</i>      | F: TGCAAGAGTGAACATGGTGGAA  | R: CATTAAACGATGCTGGCGAAAC    |
| 9                                        | Unigene38430 | <i>ACO5</i>      | F: AGCAAACCAGGAGGTGGAACA   | R: GGGAGGAACTTCTGCTCAGCAT    |
| 10                                       | Unigene8067  | <i>CYP85A1</i>   | F: GACGATAGATTGGCTAATGTGGG | R: GAGAATCAAAGTAAGAGTGGTGGAG |
| 11                                       | Unigene28604 | <i>BAK1</i>      | F: GCGGCTCTTTGTGATTTTCCT   | R: ATGTGACCCCAGCCCAGGTAC     |
| 12                                       | Unigene34050 | <i>MADS-box</i>  | F: AAGGTGGAGATGGTGAAGATGC  | R: GGCGAGAAGACGATGATGGC      |

  

| B. Validation of differential expression genes by qRT-PCR |                  |                  |                    |                    |
|-----------------------------------------------------------|------------------|------------------|--------------------|--------------------|
|                                                           | unigene          | gene name        | log2 ratio RNA-Seq | log2 ratio qRT-PCR |
| H VS CK                                                   | Unigene26617_All | <i>CKX3</i>      | 4.59               | 2.10               |
|                                                           | Unigene28199_All | <i>CKX4</i>      | 3.77               | 1.07               |
|                                                           | Unigene8603_All  | <i>AUX/IAA14</i> | -6.57              | -4.64              |
|                                                           | Unigene24810_All | <i>ipt</i>       | 3.93               | 1.58               |
|                                                           | Unigene38430_All | <i>ACO1</i>      | 11.44              | 5.34               |
|                                                           | Unigene8067_All  | <i>CYP85A1</i>   | 6.56               | 6.64               |
|                                                           | Unigene16507_All | <i>CYP735A</i>   | 4.13               | 3.00               |
|                                                           | Unigene26532_All | <i>ARR9</i>      | 2.40               | 3.30               |
|                                                           | Unigene23718_All | <i>ARR5</i>      | 2.00               | 4.30               |
|                                                           | Unigene34050_All | <i>MADS-box</i>  | -11.79             | -6.64              |
| P VS CK                                                   | Unigene8603_All  | <i>AUX/IAA14</i> | -4.38              | -2.25              |
|                                                           | Unigene28199_All | <i>CKX4</i>      | -3.72              | -6.64              |
|                                                           | Unigene24810_All | <i>ipt</i>       | 2.84               | 1.25               |
|                                                           | Unigene8067_All  | <i>CYP85A1</i>   | 7.08               | 4.64               |
|                                                           | Unigene16507_All | <i>CYP735A</i>   | 4.73               | 2.58               |
|                                                           | Unigene5202_All  | <i>ARR2</i>      | -3.10              | -2.00              |
|                                                           | Unigene28604_All | <i>BAK1</i>      | -2.56              | -1.43              |

**Supplementary Table S3.** Contents (mg/g) of the seven mogrosides in the tested samples (n = 3, mean ± SD).

| compounds     | pollination |      |         |      |         |      |         |      |         |      |         |      |         |      |         |      |         |      |
|---------------|-------------|------|---------|------|---------|------|---------|------|---------|------|---------|------|---------|------|---------|------|---------|------|
|               | 0 DAA       |      | 5 DAA   |      | 10 DAA  |      | 20 DAA  |      | 30 DAA  |      | 40 DAA  |      | 50 DAA  |      | 60 DAA  |      | 70 DAA  |      |
|               | Content     | SD   | Content | SD   | Content | SD   | Content | SD   | Content | SD   | Content | SD   | Content | SD   | Content | SD   | Content | SD   |
| OMV           | 0.00        | 0.00 | 0.00    | 0.00 | 0.00    | 0.00 | 0.00    | 0.00 | 0.00    | 0.00 | 0.00    | 0.00 | 0.17    | 0.01 | 1.50    | 0.01 | 2.24    | 0.05 |
| MV            | 0.00        | 0.00 | 0.00    | 0.00 | 0.00    | 0.00 | 0.00    | 0.00 | 0.00    | 0.00 | 0.00    | 0.00 | 3.03    | 0.09 | 10.13   | 0.40 | 13.49   | 0.08 |
| IMV           | 0.00        | 0.00 | 0.00    | 0.00 | 0.00    | 0.00 | 0.00    | 0.00 | 0.00    | 0.00 | 0.00    | 0.00 | 0.13    | 0.03 | 0.91    | 0.08 | 1.44    | 0.04 |
| SI            | 0.00        | 0.00 | 0.00    | 0.00 | 0.00    | 0.00 | 0.00    | 0.00 | 0.00    | 0.00 | 0.02    | 0.00 | 3.09    | 0.01 | 4.02    | 0.13 | 3.98    | 0.08 |
| MIVA          | 0.00        | 0.00 | 0.00    | 0.00 | 0.00    | 0.00 | 0.00    | 0.00 | 0.00    | 0.00 | 0.07    | 0.00 | 4.48    | 0.14 | 4.19    | 0.03 | 0.23    | 0.03 |
| MIV           | 0.00        | 0.00 | 0.00    | 0.00 | 0.00    | 0.00 | 0.00    | 0.00 | 0.00    | 0.00 | 0.00    | 0.00 | 0.17    | 0.01 | 0.89    | 0.01 | 1.73    | 0.02 |
| MIII          | 0.00        | 0.00 | 0.60    | 0.00 | 1.41    | 0.01 | 1.14    | 0.03 | 1.92    | 0.05 | 3.57    | 0.07 | 6.08    | 0.29 | 2.29    | 0.01 | 0.10    | 0.01 |
| parthenocarpy |             |      |         |      |         |      |         |      |         |      |         |      |         |      |         |      |         |      |
|               | 5 DAA       |      | 10 DAA  |      | 20 DAA  |      | 30 DAA  |      | 40 DAA  |      | 50 DAA  |      | 60 DAA  |      | 70 DAA  |      |         |      |
|               | Content     | SD   | Content | SD   | Content | SD   | Content | SD   | Content | SD   | Content | SD   | Content | SD   | Content | SD   | Content | SD   |
| OMV           | 0.00        | 0.00 | 0.00    | 0.00 | 0.00    | 0.00 | 0.00    | 0.00 | 0.00    | 0.00 | 0.01    | 0.00 | 1.89    | 0.01 | 2.51    | 0.07 |         |      |
| MV            | 0.00        | 0.00 | 0.00    | 0.00 | 0.00    | 0.00 | 0.00    | 0.00 | 0.01    | 0.00 | 0.19    | 0.00 | 11.55   | 0.32 | 13.23   | 0.44 |         |      |
| IMV           | 0.00        | 0.00 | 0.00    | 0.00 | 0.00    | 0.00 | 0.00    | 0.00 | 0.00    | 0.00 | 0.01    | 0.00 | 0.60    | 0.05 | 1.00    | 0.02 |         |      |
| SI            | 0.00        | 0.00 | 0.00    | 0.00 | 0.00    | 0.00 | 0.00    | 0.00 | 0.03    | 0.00 | 0.76    | 0.03 | 4.25    | 0.06 | 4.07    | 0.19 |         |      |
| MIVA          | 0.00        | 0.00 | 0.00    | 0.00 | 0.00    | 0.00 | 0.00    | 0.00 | 0.08    | 0.00 | 1.69    | 0.00 | 4.28    | 0.04 | 2.00    | 0.20 |         |      |
| MIV           | 0.00        | 0.00 | 0.00    | 0.00 | 0.00    | 0.00 | 0.00    | 0.00 | 0.00    | 0.00 | 0.01    | 0.00 | 0.23    | 0.01 | 0.31    | 0.00 |         |      |
| MIII          | 0.22        | 0.00 | 0.58    | 0.02 | 0.47    | 0.55 | 2.26    | 0.00 | 4.05    | 0.15 | 5.66    | 0.16 | 2.58    | 0.09 | 1.10    | 0.06 |         |      |

**Supplementary Table S4.** The differentially expressed genes in the fruits set were compared with those in untreated ovaries. In excel file

**Supplementary Table S5.** Known genes associated with hormone biosynthesis and signaling in *S. grosvenorii* fruits.

| gene ID        | gene name     | log2 Ratio (P VS CK) | log2 Ratio (H VS CK) |
|----------------|---------------|----------------------|----------------------|
| Unigene36741   | <i>AAO1</i>   | 12.36                | 0.00                 |
| CL3450.Contig1 | <i>ABCB13</i> | 0.00                 | -2.53                |
| Unigene36541   | <i>ABCB4</i>  | 11.59                | 0.00                 |
| CL4419.Contig1 | <i>ACO1</i>   | -1.09                | 0.00                 |
| Unigene38430   | <i>ACO5</i>   | 0.00                 | 11.44                |
| CL3326.Contig3 | <i>AHP1</i>   | -2.77                | 0.00                 |
| CL9054.Contig2 | <i>ARF10</i>  | -3.49                | 0.00                 |
| Unigene1197    | <i>ARF18</i>  | 1.62                 | 0.00                 |
| CL447.Contig8  | <i>ARF2</i>   | 0.00                 | -1.19                |
| CL447.Contig2  | <i>ARF2</i>   | 0.00                 | -1.05                |
| CL447.Contig6  | <i>ARF2</i>   | 0.00                 | -1.04                |
| CL447.Contig3  | <i>ARF2</i>   | 0.00                 | -1.01                |
| CL7697.Contig1 | <i>ARF3</i>   | -1.15                | 0.00                 |
| CL2138.Contig2 | <i>ARF4</i>   | -1.57                | 0.00                 |
| Unigene21129   | <i>ARF6</i>   | -1.69                | 0.00                 |
| CL2187.Contig3 | <i>ARF8</i>   | -1.61                | 0.00                 |
| CL2187.Contig4 | <i>ARF8</i>   | -1.08                | 0.00                 |
| Unigene12013   | <i>ARR11</i>  | 1.26                 | 0.00                 |
| Unigene5202    | <i>ARR2</i>   | -3.10                | 0.00                 |
| Unigene23718   | <i>ARR5</i>   | 0.00                 | 2.00                 |
| CL4639.Contig1 | <i>ARR8</i>   | 1.04                 | 0.00                 |
| Unigene26532   | <i>ARR9</i>   | 0.00                 | 2.40                 |
| CL8439.Contig1 | <i>ARR9</i>   | 1.81                 | 0.00                 |
| Unigene22476   | <i>ARR9</i>   | 0.00                 | 6.32                 |
| Unigene38327   | <i>ARR9</i>   | 0.00                 | 5.62                 |
| CL4404.Contig2 | <i>ARR9</i>   | 0.00                 | 5.59                 |
| CL8439.Contig1 | <i>ARR9</i>   | 0.00                 | 2.61                 |
| CL4639.Contig1 | <i>ARR9</i>   | 0.00                 | 1.10                 |
| CL7295.Contig2 | <i>AUX22</i>  | 0.00                 | 1.64                 |
| Unigene27613   | <i>AUX22B</i> | 0.00                 | 1.82                 |
| Unigene20393   | <i>AUX22D</i> | 1.36                 | 0.00                 |
| Unigene17033   | <i>AUX28</i>  | 0.00                 | -1.67                |
| CL99.Contig6   | <i>BAK1</i>   | 9.42                 | 8.90                 |
| Unigene36842   | <i>BAK1</i>   | 3.52                 | 0.00                 |
| CL8030.Contig1 | <i>BAK1</i>   | 1.46                 | 1.26                 |
| CL8624.Contig2 | <i>BAK1</i>   | 1.10                 | 0.00                 |
| Unigene32319   | <i>BAK1</i>   | -3.92                | 0.00                 |
| Unigene28604   | <i>BAK1</i>   | -2.56                | 0.00                 |



|                |               |       |       |
|----------------|---------------|-------|-------|
| Unigene13348   | <i>BAK1</i>   | 0.00  | 1.45  |
| Unigene4347    | <i>BAK1</i>   | 0.00  | 1.19  |
| Unigene6223    | <i>BRI1</i>   | 5.12  | 4.74  |
| Unigene36802   | <i>BRI1</i>   | 4.20  | 0.00  |
| Unigene39789   | <i>BRI1</i>   | 4.20  | 4.31  |
| Unigene30074   | <i>BRI1</i>   | 1.77  | 1.71  |
| Unigene6824    | <i>BRI1</i>   | 1.67  | 0.00  |
| CL5352.Contig1 | <i>BRI1</i>   | 1.59  | 1.37  |
| Unigene553     | <i>BRI1</i>   | 1.26  | 0.00  |
| Unigene19585   | <i>BRI1</i>   | 1.18  | 0.00  |
| CL2623.Contig1 | <i>BRI1</i>   | 1.14  | 0.00  |
| CL5430.Contig1 | <i>BRI1</i>   | 1.01  | 0.00  |
| Unigene22445   | <i>BRI1</i>   | -2.41 | 0.00  |
| Unigene29260   | <i>BRI1</i>   | -2.22 | -1.40 |
| Unigene10607   | <i>BRI1</i>   | -1.72 | 0.00  |
| Unigene3800    | <i>BRI1</i>   | -1.70 | 0.00  |
| Unigene23767   | <i>BRI1</i>   | -1.66 | 0.00  |
| CL5352.Contig2 | <i>BRI1</i>   | -1.11 | -1.51 |
| Unigene7064    | <i>BRI1</i>   | 0.00  | 1.03  |
| Unigene28015   | <i>BRI1</i>   | 0.00  | 2.06  |
| Unigene1063    | <i>BRI1</i>   | 0.00  | 1.23  |
| Unigene16837   | <i>BRI1</i>   | 0.00  | 1.13  |
| Unigene25819   | <i>BRI1</i>   | 0.00  | -2.76 |
| Unigene10607   | <i>BRI1</i>   | 0.00  | -1.53 |
| Unigene33543   | <i>BSK</i>    | -2.00 | 0.00  |
| Unigene28628   | <i>BZR1/2</i> | -2.66 | 0.00  |
| CL5240.Contig1 | <i>CKX</i>    | 2.72  | 0.00  |
| CL5240.Contig3 | <i>CKX</i>    | 1.31  | 0.00  |
| CL5240.Contig1 | <i>CKX</i>    | 0.00  | 1.69  |
| Unigene26617   | <i>CKX3</i>   | -1.97 | 4.59  |
| Unigene28199   | <i>CKX4</i>   | -3.72 | 3.77  |
| CL6268.Contig1 | <i>CKX5</i>   | 0.00  | 5.27  |
| CL6268.Contig3 | <i>CKX5</i>   | 0.00  | 3.03  |
| Unigene27851   | <i>CKX6</i>   | 0.00  | 2.02  |
| CL825.Contig2  | <i>CKX7</i>   | -2.45 | 0.00  |
| CL8730.Contig2 | <i>CRE1</i>   | 3.20  | 0.00  |
| CL9037.Contig1 | <i>CRE1</i>   | 1.55  | 2.03  |
| Unigene7550    | <i>CRE1</i>   | 1.43  | 0.00  |
| CL473.Contig4  | <i>CRE1</i>   | 1.42  | 1.42  |
| CL1288.Contig4 | <i>CRE1</i>   | 1.13  | 0.00  |
| Unigene32548   | <i>CRE1</i>   | -2.77 | 0.00  |
| Unigene19591   | <i>CRE1</i>   | -1.84 | -1.78 |
| Unigene19942   | <i>CRE1</i>   | -1.55 | 0.00  |
| CL9037.Contig5 | <i>CRE1</i>   | 0.00  | 2.18  |
| CL9037.Contig3 | <i>CRE1</i>   | 0.00  | 2.05  |

|                |                 |        |       |
|----------------|-----------------|--------|-------|
| Unigene19587   | <i>CRE1</i>     | 0.00   | 2.05  |
| CL9037.Contig4 | <i>CRE1</i>     | 0.00   | 2.03  |
| CL1552.Contig1 | <i>CRE1</i>     | 0.00   | 1.39  |
| Unigene8704    | <i>CRE1</i>     | 0.00   | 1.34  |
| CL9037.Contig2 | <i>CRE1</i>     | 0.00   | 1.33  |
| Unigene13902   | <i>CRE1</i>     | 0.00   | 1.24  |
| Unigene36217   | <i>CTR1</i>     | -1.84  | 0.00  |
| Unigene16507   | <i>CYP735A</i>  | 4.73   | 4.13  |
| Unigene9145    | <i>CYP735A</i>  | 3.69   | 0.00  |
| Unigene22884   | <i>CYP735A</i>  | 3.05   | 2.07  |
| Unigene23129   | <i>CYP735A1</i> | 1.29   | 1.10  |
| Unigene8067    | <i>CYP85A1</i>  | 7.08   | 6.56  |
| Unigene23815   | <i>DELLA</i>    | 1.17   | 2.00  |
| Unigene29365   | <i>EBF1</i>     | 0.00   | 1.34  |
| Unigene579     | <i>EIN2</i>     | 1.19   | 0.00  |
| Unigene7638    | <i>ERF1</i>     | -1.17  | 0.00  |
| CL1147.Contig2 | <i>ERF1</i>     | -1.09  | 0.00  |
| Unigene5054    | <i>ERF1</i>     | 0.00   | 1.79  |
| Unigene17470   | <i>ERF1/2</i>   | 0.00   | 2.37  |
| Unigene18028   | <i>ERF12</i>    | -1.02  | 0.00  |
| Unigene39160   | <i>ERF13</i>    | 0.00   | 3.01  |
| Unigene27890   | <i>ERF15</i>    | 1.82   | 2.52  |
| Unigene17470   | <i>ERF1B</i>    | 1.48   | 2.37  |
| Unigene8752    | <i>ERF1B</i>    | 0.00   | 2.92  |
| Unigene26851   | <i>ERF1B</i>    | 0.00   | 1.04  |
| CL1402.Contig3 | <i>ETR1</i>     | 1.18   | 0.00  |
| Unigene5418    | <i>GA20ox</i>   | 2.78   | 2.61  |
| CL4689.Contig1 | <i>GA20ox</i>   | -10.12 | 0.00  |
| Unigene16000   | <i>GA20ox</i>   | -2.59  | 0.00  |
| Unigene16449   | <i>GA20ox</i>   | -1.46  | 0.00  |
| CL4689.Contig2 | <i>GA20ox</i>   | -1.10  | -1.05 |
| Unigene15873   | <i>GA20ox</i>   | 0.00   | 4.74  |
| CL42.Contig5   | <i>GA2ox</i>    | -8.63  | 0.00  |
| CL6621.Contig1 | <i>GA2ox</i>    | 0.00   | 1.27  |
| Unigene36393   | <i>GA3ox</i>    | 11.83  | 11.59 |
| Unigene4247    | <i>GA3ox</i>    | 1.02   | 0.00  |
| CL4210.Contig2 | <i>GA3ox</i>    | 0.00   | 1.46  |
| Unigene20296   | <i>GDSL</i>     | 1.86   | 2.30  |
| CL5270.Contig5 | <i>GH3.1</i>    | 0.00   | -2.92 |
| CL6691.Contig2 | <i>GH3.6</i>    | 0.00   | -1.25 |
| Unigene26277   | <i>GH3.9</i>    | 0.00   | 1.17  |
| Unigene24895   | <i>GID1</i>     | -1.77  | 0.00  |
| Unigene10444   | <i>GID1</i>     | -1.70  | -1.47 |
| CL5380.Contig1 | <i>GID1</i>     | -1.58  | 0.00  |
| Unigene24542   | <i>GID1</i>     | -1.51  | -1.11 |

|                |                 |        |        |
|----------------|-----------------|--------|--------|
| Unigene10023   | <i>GID1</i>     | -1.01  | 0.00   |
| CL5380.Contig2 | <i>GID1</i>     | 0.00   | -2.33  |
| Unigene18127   | <i>IAA11</i>    | 1.15   | 0.00   |
| Unigene259     | <i>IAA14</i>    | -2.37  | -11.95 |
| Unigene27613   | <i>IAA22B</i>   | 1.93   | 0.00   |
| CL106.Contig2  | <i>IAA26</i>    | -2.23  | 0.00   |
| CL106.Contig1  | <i>IAA26</i>    | -2.15  | 0.00   |
| Unigene26743   | <i>IAA29</i>    | 2.26   | 2.03   |
| Unigene24075   | <i>IAA29</i>    | 1.10   | 0.00   |
| Unigene14280   | <i>IAA30</i>    | -1.40  | -3.18  |
| Unigene32790   | <i>IAA33</i>    | -3.72  | 0.00   |
| Unigene7546    | <i>IAA4</i>     | 1.60   | 1.35   |
| Unigene8603    | <i>IAA14</i>    | -4.38  | 0.00   |
| CL7924.Contig2 | <i>IAA9</i>     | 0.00   | 1.76   |
| Unigene5234    | <i>lpt</i>      | 5.36   | 5.23   |
| Unigene24810   | <i>lpt</i>      | 2.84   | 3.93   |
| CL7508.Contig3 | <i>lpt</i>      | 2.43   | 2.12   |
| CL7508.Contig2 | <i>lpt</i>      | 2.26   | 0.00   |
| Unigene5215    | <i>lpt</i>      | -1.63  | 0.00   |
| Unigene23374   | <i>lpt</i>      | -1.62  | 0.00   |
| CL4996.Contig1 | <i>KAO1</i>     | 1.26   | -2.09  |
| CL6454.Contig2 | <i>KS</i>       | -1.03  | 0.00   |
| Unigene29534   | <i>LAX</i>      | 0.00   | -1.97  |
| CL1290.Contig2 | <i>LAX1</i>     | 1.70   | 0.00   |
| Unigene11918   | <i>LAX3</i>     | 1.81   | 0.00   |
| CL8948.Contig1 | <i>LAX5</i>     | 0.00   | -2.49  |
| Unigene3046    | <i>LOB</i>      | 3.10   | 0.00   |
| Unigene34050   | <i>MADS-box</i> | -11.79 | -11.79 |
| Unigene29172   | <i>SAUR</i>     | 2.59   | 0.00   |
| Unigene12458   | <i>SAUR</i>     | 1.74   | 1.76   |
| Unigene13680   | <i>SAUR</i>     | 1.50   | 1.54   |
| Unigene20545   | <i>SAUR</i>     | 1.34   | 2.05   |
| Unigene7204    | <i>SAUR</i>     | 1.12   | 0.00   |
| Unigene27487   | <i>SAUR</i>     | -3.04  | -1.90  |
| Unigene3061    | <i>SAUR</i>     | -2.62  | -1.51  |
| Unigene33588   | <i>SAUR</i>     | -2.16  | -2.69  |
| Unigene27077   | <i>SAUR</i>     | -1.06  | 0.00   |
| Unigene29737   | <i>SAUR</i>     | 2.66   | 1.73   |
| Unigene6800    | <i>SAUR</i>     | 0.00   | 2.25   |
| Unigene34422   | <i>SAUR</i>     | 0.00   | -11.38 |
| Unigene3061    | <i>SAUR</i>     | 0.00   | -1.51  |
| Unigene26182   | <i>YUCCA</i>    | 1.67   | 1.21   |

---
