# Supplementary material for: Developmental, chemical and transcriptional characteristics of artificially pollinated and hormone-induced parthenocarpic fruits of Siraitia grosvenorii
Source: Royal Society of Chemistry journal article supplement (doi:10.1039/c6ra28341a), 2017-01-01
Supplement: c6ra28341a2.xlsx [file c6ra28341a2.xlsx]

## Sheet: H vs CK
Supplementary Table S4. The differentially expressed genes in ovaries at 3 days after hormone treatment with respect to 0 DAA in S. grosvenorii.
geneID(5075)	geneLength	0d_rawfragments(21913960)	H3d_rawfragments(20506967)	0d_FPKM	H3d_FPKM	log2 Ratio(H3d/0d)	Up-Down-Regulation(H3d/0d)	P-value	FDR	Nr-ID	Nr-Score	Nr-Evalue	Nr-annotation	Nt-ID	Nt-Score	Nt-Evalue	Nt-annotation	Swissprot-ID	Swissprot-Score	Swissprot-Evalue	Swissprot-annotation	COG-Protein-or-Domain	COG-Score	COG-Evalue	COG-ID	COG-Function-Description	KO_id	KEGG-Evalue	KEGG-Score	KEGG-Gene	ko_definition	GO-BiologicalProcess	GO-MolecularFunction	Go-CellularComponent	Pathway ID//Pathway
Unigene22370_All	299	0	82	0	13.3734	13.7071	Up	1.25804e-26	5.14087e-25	--	--	--	--	--	--	--	--	--	--	--	--	--	--	--	--	--	--	--	--	--	--	-	-	-	--
CL103.Contig12_All	282	0	69	0	11.9316	13.5425	Up	1.59779e-22	5.51548e-21	gi|449451012|ref|XP_004143256.1|	181	4e-45	PREDICTED: phenylalanine ammonia-lyase-like [Cucumis sativus]	gi|449482465|ref|XM_004156243.1|	315	1e-83	PREDICTED: Cucumis sativus phenylalanine ammonia-lyase-like (LOC101218617), mRNA	sp|P45733|PAL3_TOBAC	174	1e-44	Phenylalanine ammonia-lyase OS=Nicotiana tabacum PE=2 SV=1	RSp0365	73.9	7e-14	COG2986	Histidine ammonia-lyase	K10775	8e-45	176	rcu:RCOM_1355480	phenylalanine ammonia-lyase [EC:4.3.1.24]	GO:0009800//cinnamic acid biosynthetic process;GO:0006559//L-phenylalanine catabolic process	GO:0045548//phenylalanine ammonia-lyase activity	GO:0005737//cytoplasm	--
Unigene39636_All	330	0	79	0	11.6738	13.511	Up	1.11361e-25	4.38112e-24	gi|255568645|ref|XP_002525296.1|	81.6	3e-15	conserved hypothetical protein [Ricinus communis] >gi|223535454|gb|EEF37124.1| conserved hypothetical protein [Ricinus communis]	--	--	--	--	--	--	--	--	--	--	--	--	--	--	--	--	--	--	GO:0010224//response to UV-B	-	-	--
Unigene39779_All	447	0	79	0	8.6182	13.0732	Up	1.11361e-25	4.38367e-24	--	--	--	--	gi|270142303|gb|BT109255.1|	165	5e-38	Picea glauca clone GQ03206_G11 mRNA sequence	--	--	--	--	--	--	--	--	--	--	--	--	--	--	-	-	-	--
Unigene12939_All	286	0	47	0	8.0137	12.9683	Up	1.40751e-15	3.40122e-14	gi|462407628|gb|EMJ12962.1|	113.6	9e-25	hypothetical protein PRUPE_ppa009566mg [Prunus persica]	gi|225435449|ref|XM_002282785.1|	141	4e-31	PREDICTED: Vitis vinifera transcription factor MYB46-like (LOC100243210), mRNA	sp|Q9LXV2|MYB46_ARATH	102	5e-23	Transcription factor MYB46 OS=Arabidopsis thaliana GN=MYB46 PE=2 SV=1	--	--	--	--	--	K09422	2e-25	111	vvi:100243210	myb proto-oncogene protein, plant	GO:0010413//glucuronoxylan metabolic process;GO:0009751//response to salicylic acid stimulus;GO:0045492//xylan biosynthetic process;GO:1901348//positive regulation of secondary cell wall biogenesis;GO:0045893//positive regulation of transcription, DNA-dependent;GO:0050832//defense response to fungus	GO:0003677//DNA binding;GO:0003700//sequence-specific DNA binding transcription factor activity;GO:0003682//chromatin binding	GO:0005634//nucleus	--
Unigene19418_All	327	0	50	0	7.4563	12.8642	Up	1.59007e-16	4.06625e-15	gi|449463984|ref|XP_004149709.1|	199.1	1e-50	PREDICTED: putative copper-transporting ATPase HMA5-like [Cucumis sativus] >gi|449508310|ref|XP_004163278.1| PREDICTED: putative copper-transporting ATPase HMA5-like [Cucumis sativus]	gi|224057464|ref|XM_002299198.1|	174	4e-41	Populus trichocarpa heavy metal ATPase, mRNA	sp|Q9S7J8|HMA7_ARATH	125	4e-30	Copper-transporting ATPase RAN1 OS=Arabidopsis thaliana GN=RAN1 PE=1 SV=1	CAC3655	104	3e-23	COG2217	Cation transport ATPase	K01533	2e-48	188	pop:POPTR_547880	Cu2+-exporting ATPase [EC:3.6.3.4]	GO:0060003//copper ion export	GO:0005507//copper ion binding;GO:0004008//copper-exporting ATPase activity;GO:0005524//ATP binding	GO:0016021//integral to membrane	--
Unigene39608_All	226	0	34	0	7.3362	12.8408	Up	1.78762e-11	3.21938e-10	gi|449440447|ref|XP_004137996.1|	97.4	6e-20	PREDICTED: leucoanthocyanidin dioxygenase-like [Cucumis sativus] >gi|449524760|ref|XP_004169389.1| PREDICTED: leucoanthocyanidin dioxygenase-like [Cucumis sativus]	--	--	--	--	--	--	--	--	--	--	--	--	--	--	--	--	--	--	GO:0009058//biosynthetic process;GO:0044710	GO:0016706//oxidoreductase activity, acting on paired donors, with incorporation or reduction of molecular oxygen, 2-oxoglutarate as one donor, and incorporation of one atom each of oxygen into both donors	GO:0005737//cytoplasm	--
Unigene2461_All	507	0	76	0	7.3098	12.8356	Up	9.85754e-25	3.75147e-23	gi|225424938|ref|XP_002263548.1|	69.7	2e-11	PREDICTED: uncharacterized protein LOC100251357 [Vitis vinifera]	--	--	--	--	--	--	--	--	--	--	--	--	--	--	--	--	--	--	-	-	-	--
CL2590.Contig3_All	374	0	56	0	7.3015	12.834	Up	2.02928e-18	5.71726e-17	gi|343466205|gb|AEM42996.1|	55.5	4e-18	S-RNase [Siraitia grosvenorii]	--	--	--	--	sp|P80022|RNLE_SOLLC	53.5	1e-15	Extracellular ribonuclease LE OS=Solanum lycopersicum PE=1 SV=2	--	--	--	--	--	K01166	6e-14	52.8	vvi:100249919	ribonuclease T2 [EC:3.1.27.1]	-	GO:0016787//hydrolase activity	-	--
Unigene39502_All	831	0	116	0	6.807	12.7328	Up	2.32606e-37	1.31232e-35	gi|147785835|emb|CAN73071.1|	54.3	4e-50	hypothetical protein VITISV_032383 [Vitis vinifera]	--	--	--	--	sp|P10978|POLX_TOBAC	103	1e-22	Retrovirus-related Pol polyprotein from transposon TNT 1-94 OS=Nicotiana tabacum PE=2 SV=1	--	--	--	--	--	K04728	2e-11	57	gmx:100788458	ataxia telangiectasia mutated family protein [EC:2.7.11.1]	-	-	-	--
Unigene36957_All	237	0	33	0	6.7899	12.7292	Up	3.69788e-11	6.4986e-10	--	--	--	--	--	--	--	--	--	--	--	--	--	--	--	--	--	--	--	--	--	--	-	-	-	--
Unigene28831_All	647	0	89	0	6.7079	12.7116	Up	7.76148e-29	3.41308e-27	gi|449452150|ref|XP_004143823.1|	250.4	1e-65	PREDICTED: polygalacturonase-like [Cucumis sativus] >gi|449525056|ref|XP_004169536.1| PREDICTED: polygalacturonase-like [Cucumis sativus]	gi|449452149|ref|XM_004143775.1|	161	1e-36	PREDICTED: Cucumis sativus polygalacturonase-like (LOC101217206), mRNA >gi|449525055|ref|XM_004169488.1| PREDICTED: Cucumis sativus polygalacturonase-like (LOC101217206), mRNA	sp|P48979|PGLR_PRUPE	192	1e-49	Polygalacturonase OS=Prunus persica PE=2 SV=1	--	--	--	--	--	K01184	3e-50	196	vvi:100242164	polygalacturonase [EC:3.2.1.15]	GO:0005975//carbohydrate metabolic process	GO:0004650//polygalacturonase activity;GO:0047911	GO:0005576//extracellular region	--
CL8086.Contig1_All	387	0	52	0	6.5523	12.6778	Up	3.71584e-17	9.86062e-16	gi|449432516|ref|XP_004134045.1|	197.6	4e-50	PREDICTED: probable actin-related protein 2/3 complex subunit 2-like [Cucumis sativus] >gi|449486664|ref|XP_004157361.1| PREDICTED: probable actin-related protein 2/3 complex subunit 2-like [Cucumis sativus]	gi|449486663|ref|XM_004157313.1|	396	1e-108	PREDICTED: Cucumis sativus probable actin-related protein 2/3 complex subunit 2-like (LOC101227415), mRNA	--	--	--	--	--	--	--	--	--	K05758	1e-42	169	vvi:100258050	actin related protein 2/3 complex, subunit 2	GO:0030833//regulation of actin filament polymerization	GO:0005198//structural molecule activity	GO:0005737//cytoplasm;GO:0005885//Arp2/3 protein complex	--
Unigene25740_All	349	0	45	0	6.2876	12.6183	Up	6.02294e-15	1.39988e-13	--	--	--	--	--	--	--	--	--	--	--	--	--	--	--	--	--	--	--	--	--	--	-	-	-	--
CL6093.Contig2_All	369	0	47	0	6.2111	12.6006	Up	1.40751e-15	3.40001e-14	gi|422293454|gb|EKU20754.1|	34.7	6e-15	transcript antisense to ribosomal rna protein [Nannochloropsis gaditana CCMP526]	gi|66864279|gb|DQ015734.1|	127	9e-27	Chlamydomonas uva-maris strain SAG 19.89 26S ribosomal RNA gene, partial sequence	--	--	--	--	--	--	--	--	--	--	--	--	--	--	-	-	-	--
Unigene39794_All	209	0	26	0	6.0663	12.5666	Up	5.99384e-09	8.44347e-08	--	--	--	--	gi|270142303|gb|BT109255.1|	109	1e-21	Picea glauca clone GQ03206_G11 mRNA sequence	--	--	--	--	--	--	--	--	--	--	--	--	--	--	-	-	-	--
Unigene15104_All	296	0	35	0	5.766	12.4934	Up	8.64164e-12	1.59847e-10	--	--	--	--	--	--	--	--	--	--	--	--	--	--	--	--	--	--	--	--	--	--	-	-	-	--
Unigene36808_All	307	0	36	0	5.7182	12.4813	Up	4.1775e-12	7.94242e-11	--	--	--	--	--	--	--	--	--	--	--	--	--	--	--	--	--	--	--	--	--	--	-	-	-	--
Unigene28352_All	465	0	54	0	5.6629	12.4673	Up	8.6836e-18	2.37618e-16	gi|255573394|ref|XP_002527623.1|	110.2	1e-23	Anthocyanin 5-aromatic acyltransferase, putative [Ricinus communis] >gi|223532997|gb|EEF34762.1| Anthocyanin 5-aromatic acyltransferase, putative [Ricinus communis]	--	--	--	--	sp|Q940Z5|PMAT1_ARATH	89	1e-18	Phenolic glucoside malonyltransferase 1 OS=Arabidopsis thaliana GN=PMAT1 PE=1 SV=1	--	--	--	--	--	K14329	6e-16	81.3	ath:AT5G61160	agmatine coumaroyltransferase [EC:2.3.1.64 2.3.1.-]	-	GO:0016740//transferase activity	-	--
Unigene36932_All	382	0	44	0	5.6168	12.4555	Up	1.24591e-14	2.83726e-13	--	--	--	--	--	--	--	--	--	--	--	--	--	--	--	--	--	--	--	--	--	--	-	-	-	--
CL2626.Contig3_All	322	0	36	0	5.4519	12.4125	Up	4.1775e-12	7.93795e-11	gi|470135697|ref|XP_004303646.1|	143.7	8e-34	PREDICTED: zeatin O-glucosyltransferase-like [Fragaria vesca subsp. vesca]	gi|470135696|ref|XM_004303598.1|	143	1e-31	PREDICTED: Fragaria vesca subsp. vesca zeatin O-glucosyltransferase-like (LOC101308780), mRNA	sp|Q9ZSK5|ZOG_PHALU	105	5e-24	Zeatin O-glucosyltransferase OS=Phaseolus lunatus GN=ZOG1 PE=2 SV=1	--	--	--	--	--	K13495	2e-33	138	rcu:RCOM_1099970	cis-zeatin O-glucosyltransferase [EC:2.4.1.215]	GO:0008152//metabolic process	GO:0050403//trans-zeatin O-beta-D-glucosyltransferase activity	-	--
Unigene9286_All	273	0	29	0	5.18	12.3387	Up	6.77124e-10	1.06112e-08	--	--	--	--	--	--	--	--	--	--	--	--	--	--	--	--	--	--	--	--	--	--	-	-	-	--
Unigene39798_All	390	0	41	0	5.1265	12.3238	Up	1.10287e-13	2.35296e-12	--	--	--	--	--	--	--	--	--	--	--	--	--	--	--	--	--	--	--	--	--	--	-	-	-	--
Unigene39833_All	201	0	21	0	5.0947	12.3148	Up	2.27038e-07	2.61107e-06	--	--	--	--	--	--	--	--	--	--	--	--	--	--	--	--	--	--	--	--	--	--	-	-	-	--
Unigene39577_All	278	0	29	0	5.0869	12.3126	Up	6.77124e-10	1.06087e-08	--	--	--	--	--	--	--	--	--	--	--	--	--	--	--	--	--	--	--	--	--	--	-	-	-	--
Unigene19443_All	222	0	23	0	5.0521	12.3027	Up	5.30568e-08	6.63347e-07	gi|449526435|ref|XP_004170219.1|	142.1	2e-33	PREDICTED: protein O-glucosyltransferase 1-like [Cucumis sativus]	gi|449526434|ref|XM_004170171.1|	123	8e-26	PREDICTED: Cucumis sativus protein O-glucosyltransferase 1-like (LOC101213751), mRNA	--	--	--	--	--	--	--	--	--	K13667	1e-25	112	gmx:100797600	protein glucosyltransferase [EC:2.4.1.-]	-	-	-	--
Unigene16104_All	402	0	40	0	4.8521	12.2444	Up	2.2814e-13	4.74892e-12	gi|449526435|ref|XP_004170219.1|	253.8	5e-67	PREDICTED: protein O-glucosyltransferase 1-like [Cucumis sativus]	gi|449446166|ref|XM_004140795.1|	377	1e-102	PREDICTED: Cucumis sativus protein O-glucosyltransferase 1-like (LOC101213751), mRNA	--	--	--	--	--	--	--	--	--	K13667	3e-47	184	gmx:100797600	protein glucosyltransferase [EC:2.4.1.-]	-	-	-	--
Unigene28942_All	354	0	35	0	4.8213	12.2352	Up	8.64164e-12	1.59803e-10	--	--	--	--	--	--	--	--	--	--	--	--	--	--	--	--	--	--	--	--	--	--	-	-	-	--
CL3406.Contig4_All	258	0	25	0	4.7252	12.2062	Up	1.23989e-08	1.68482e-07	gi|449470372|ref|XP_004152891.1|	169.5	1e-41	PREDICTED: LOW QUALITY PROTEIN: trans-cinnamate 4-monooxygenase-like [Cucumis sativus]	gi|449470371|ref|XM_004152843.1|	291	2e-76	PREDICTED: Cucumis sativus trans-cinnamate 4-monooxygenase-like (LOC101204747), mRNA	sp|P37114|TCMO_MEDSA	122	5e-29	Trans-cinnamate 4-monooxygenase OS=Medicago sativa GN=CYP73A3 PE=2 SV=1	--	--	--	--	--	K00487	1e-39	159	gmx:100812188	trans-cinnamate 4-monooxygenase [EC:1.14.13.11]	GO:0055114//oxidation-reduction process	GO:0020037//heme binding;GO:0016710//trans-cinnamate 4-monooxygenase activity;GO:0005506//iron ion binding;GO:0009055//electron carrier activity	-	--
Unigene9465_All	243	0	23	0	4.6155	12.1723	Up	5.30568e-08	6.6347e-07	gi|77552445|gb|ABA95242.1|	33.9	4e-07	expressed protein [Oryza sativa Japonica Group]	--	--	--	--	sp|Q9SU08|AUXI1_ARATH	40.8	1e-07	Auxilin-related protein 1 OS=Arabidopsis thaliana GN=At4g12780 PE=1 SV=2	--	--	--	--	--	--	--	--	--	--	-	-	-	--
Unigene39412_All	229	0	21	0	4.4718	12.1266	Up	2.27038e-07	2.6093e-06	--	--	--	--	--	--	--	--	--	--	--	--	--	--	--	--	--	--	--	--	--	--	-	-	-	--
Unigene31932_All	240	0	22	0	4.47	12.1261	Up	1.09754e-07	1.31714e-06	--	--	--	--	--	--	--	--	--	--	--	--	--	--	--	--	--	--	--	--	--	--	-	-	-	--
Unigene22570_All	721	0	66	0	4.4638	12.1241	Up	1.41435e-21	4.66997e-20	gi|449501660|ref|XP_004161429.1|	424.9	6e-118	PREDICTED: uncharacterized LOC101207232 [Cucumis sativus]	gi|449501659|ref|XM_004161381.1|	351	6e-94	PREDICTED: Cucumis sativus uncharacterized LOC101207232 (LOC101207232), mRNA	sp|Q9C5S0|AGP9_ARATH	62.8	2e-10	Classical arabinogalactan protein 9 OS=Arabidopsis thaliana GN=AGP9 PE=1 SV=2	YKR013w	55.1	1e-07	COG2340	Uncharacterized protein with SCP/PR1 domains	K11323	3e-09	60.1	vcn:VOLCADRAFT_121342	histone arginine demethylase JMJD6 [EC:1.14.11.-]	-	-	-	--
Unigene39534_All	230	0	21	0	4.4524	12.1204	Up	2.27038e-07	2.60752e-06	--	--	--	--	--	--	--	--	--	--	--	--	--	--	--	--	--	--	--	--	--	--	-	-	-	--
Unigene16220_All	276	0	25	0	4.417	12.1089	Up	1.23989e-08	1.6855e-07	--	--	--	--	--	--	--	--	--	--	--	--	--	--	--	--	--	--	--	--	--	--	-	-	-	--
Unigene40071_All	222	0	20	0	4.3931	12.101	Up	4.69652e-07	5.11329e-06	gi|449461653|ref|XP_004148556.1|	140.6	7e-33	PREDICTED: uncharacterized protein LOC101218085 [Cucumis sativus]	gi|449461652|ref|XM_004148508.1|	206	7e-51	PREDICTED: Cucumis sativus uncharacterized LOC101218085 (LOC101218085), mRNA	--	--	--	--	--	--	--	--	--	--	--	--	--	--	-	-	-	--
Unigene5997_All	311	0	28	0	4.3903	12.1001	Up	1.40071e-09	2.12986e-08	--	--	--	--	--	--	--	--	--	--	--	--	--	--	--	--	--	--	--	--	--	--	-	-	-	--
Unigene39835_All	289	0	26	0	4.3871	12.0991	Up	5.99384e-09	8.44699e-08	--	--	--	--	--	--	--	--	--	--	--	--	--	--	--	--	--	--	--	--	--	--	-	-	-	--
Unigene32101_All	270	0	24	0	4.3346	12.0817	Up	2.56484e-08	3.34404e-07	gi|449491197|ref|XP_004158826.1|	87.4	7e-17	PREDICTED: F-box/LRR-repeat protein 4-like [Cucumis sativus]	gi|449491196|ref|XM_004158778.1|	117	6e-24	PREDICTED: Cucumis sativus F-box/LRR-repeat protein 4-like (LOC101226592), mRNA	--	--	--	--	--	--	--	--	--	--	--	--	--	--	-	-	-	--
Unigene39830_All	225	0	20	0	4.3346	12.0817	Up	4.69652e-07	5.11247e-06	--	--	--	--	--	--	--	--	--	--	--	--	--	--	--	--	--	--	--	--	--	--	-	-	-	--
Unigene39823_All	251	0	22	0	4.2741	12.0614	Up	1.09754e-07	1.31668e-06	--	--	--	--	--	--	--	--	--	--	--	--	--	--	--	--	--	--	--	--	--	--	-	-	-	--
Unigene16096_All	287	0	25	0	4.2477	12.0525	Up	1.23989e-08	1.68347e-07	--	--	--	--	--	--	--	--	--	--	--	--	--	--	--	--	--	--	--	--	--	--	-	-	-	--
Unigene6079_All	234	0	20	0	4.1679	12.0251	Up	4.69652e-07	5.11494e-06	--	--	--	--	--	--	--	--	--	--	--	--	--	--	--	--	--	--	--	--	--	--	-	-	-	--
Unigene40059_All	224	0	19	0	4.1362	12.0141	Up	9.71528e-07	1.00068e-05	gi|449445852|ref|XP_004140686.1|	102.1	2e-21	PREDICTED: probable peroxidase 61-like [Cucumis sativus] >gi|449487395|ref|XP_004157605.1| PREDICTED: probable peroxidase 61-like [Cucumis sativus]	gi|449445851|ref|XM_004140638.1|	165	2e-38	PREDICTED: Cucumis sativus probable peroxidase 61-like (LOC101213667), mRNA >gi|449487394|ref|XM_004157557.1| PREDICTED: Cucumis sativus probable peroxidase 61-like (LOC101227107), mRNA	sp|Q9FLV5|PER61_ARATH	73.2	3e-14	Probable peroxidase 61 OS=Arabidopsis thaliana GN=PER61 PE=3 SV=1	--	--	--	--	--	K00430	2e-17	85.1	vvi:100257692	peroxidase [EC:1.11.1.7]	GO:0006979//response to oxidative stress;GO:0055114//oxidation-reduction process	GO:0046872//metal ion binding;GO:0004601//peroxidase activity;GO:0020037//heme binding	GO:0071944//cell periphery;GO:0005576//extracellular region	--
Unigene39491_All	248	0	21	0	4.1292	12.0116	Up	2.27038e-07	2.61063e-06	--	--	--	--	--	--	--	--	--	--	--	--	--	--	--	--	--	--	--	--	--	--	-	-	-	--
Unigene40043_All	201	0	17	0	4.1243	12.0099	Up	4.15732e-06	3.82298e-05	gi|449496330|ref|XP_004160106.1|	85.5	2e-16	PREDICTED: MLP-like protein 31-like [Cucumis sativus]	gi|449496329|ref|XM_004160058.1|	69.9	9e-10	PREDICTED: Cucumis sativus MLP-like protein 31-like (LOC101217999), mRNA	sp|Q941R6|MLP31_ARATH	48.9	7e-07	MLP-like protein 31 OS=Arabidopsis thaliana GN=MLP31 PE=1 SV=2	--	--	--	--	--	--	--	--	--	--	-	-	-	--
Unigene39512_All	203	0	17	0	4.0837	11.9957	Up	4.15732e-06	3.82454e-05	gi|449494840|ref|XP_004159661.1|	95.9	2e-19	PREDICTED: LOW QUALITY PROTEIN: heat stress transcription factor B-3-like [Cucumis sativus]	gi|449494839|ref|XM_004159613.1|	117	4e-24	PREDICTED: Cucumis sativus heat stress transcription factor B-3-like (LOC101231242), mRNA	sp|O22230|HSFB3_ARATH	55.5	7e-09	Heat stress transcription factor B-3 OS=Arabidopsis thaliana GN=HSFB3 PE=2 SV=1	--	--	--	--	--	--	--	--	--	--	GO:0006355//regulation of transcription, DNA-dependent;GO:0046686//response to cadmium ion;GO:0009407//toxin catabolic process;GO:0006950//response to stress	GO:0043565//sequence-specific DNA binding;GO:0003700//sequence-specific DNA binding transcription factor activity	GO:0005634//nucleus	--
Unigene25933_All	602	0	50	0	4.0502	11.9838	Up	1.59007e-16	4.06471e-15	gi|449455716|ref|XP_004145597.1|	331.3	6e-90	PREDICTED: uncharacterized protein LOC101216898 [Cucumis sativus] >gi|449485275|ref|XP_004157120.1| PREDICTED: uncharacterized protein LOC101225904 [Cucumis sativus]	gi|449455715|ref|XM_004145549.1|	398	1e-108	PREDICTED: Cucumis sativus uncharacterized LOC101216898 (LOC101216898), mRNA >gi|449485274|ref|XM_004157072.1| PREDICTED: Cucumis sativus uncharacterized LOC101225904 (LOC101225904), mRNA	--	--	--	--	--	--	--	--	--	--	--	--	--	--	-	-	GO:0005739//mitochondrion	--
CL2698.Contig3_All	218	0	18	0	4.0264	11.9753	Up	2.00972e-06	1.95897e-05	gi|449445379|ref|XP_004140450.1|	138.3	3e-32	PREDICTED: lignin-forming anionic peroxidase-like [Cucumis sativus] >gi|449526369|ref|XP_004170186.1| PREDICTED: lignin-forming anionic peroxidase-like [Cucumis sativus]	gi|449445378|ref|XM_004140402.1|	260	5e-67	PREDICTED: Cucumis sativus lignin-forming anionic peroxidase-like (LOC101213432), mRNA >gi|449526368|ref|XM_004170138.1| PREDICTED: Cucumis sativus lignin-forming anionic peroxidase-like (LOC101227079), mRNA	sp|Q02200|PERX_NICSY	115	8e-27	Lignin-forming anionic peroxidase OS=Nicotiana sylvestris PE=2 SV=1	--	--	--	--	--	K00430	2e-29	125	gmx:100786161	peroxidase [EC:1.11.1.7]	GO:0055114//oxidation-reduction process;GO:0006979//response to oxidative stress	GO:0020037//heme binding;GO:0046872//metal ion binding;GO:0004601//peroxidase activity	-	--
CL2520.Contig4_All	207	0	17	0	4.0048	11.9675	Up	4.15732e-06	3.8235e-05	gi|449449599|ref|XP_004142552.1|	118.2	3e-26	PREDICTED: germin-like protein subfamily 1 member 17-like [Cucumis sativus] >gi|449479697|ref|XP_004155680.1| PREDICTED: germin-like protein subfamily 1 member 17-like [Cucumis sativus]	gi|449449598|ref|XM_004142504.1|	97.6	4e-18	PREDICTED: Cucumis sativus germin-like protein subfamily 1 member 17-like (LOC101218696), mRNA >gi|449479696|ref|XM_004155632.1| PREDICTED: Cucumis sativus germin-like protein subfamily 1 member 17-like (LOC101218696), mRNA	sp|Q9SFF9|GL17_ARATH	107	2e-24	Germin-like protein subfamily 1 member 7 OS=Arabidopsis thaliana GN=At3g05950 PE=2 SV=1	--	--	--	--	--	--	--	--	--	--	GO:0042350//GDP-L-fucose biosynthetic process;GO:0055114//oxidation-reduction process;GO:0009651//response to salt stress;GO:0006857//oligopeptide transport	GO:0045735//nutrient reservoir activity;GO:0030145//manganese ion binding;GO:0050162//oxalate oxidase activity;GO:0004784//superoxide dismutase activity;GO:0000166//nucleotide binding;GO:0050662//coenzyme binding	GO:0005618//cell wall;GO:0031012//extracellular matrix;GO:0005737//cytoplasm;GO:0048046//apoplast	--
Unigene39609_All	220	0	18	0	3.9898	11.9621	Up	2.00972e-06	1.95699e-05	--	--	--	--	--	--	--	--	--	--	--	--	--	--	--	--	--	--	--	--	--	--	-	-	-	--
Unigene22568_All	250	0	20	0	3.9011	11.9297	Up	4.69652e-07	5.11164e-06	--	--	--	--	--	--	--	--	--	--	--	--	--	--	--	--	--	--	--	--	--	--	-	-	-	--
Unigene40002_All	265	0	21	0	3.8643	11.916	Up	2.27038e-07	2.61018e-06	--	--	--	--	gi|325195814|emb|FR826605.1|	240	6e-61	Albugo laibachii Nc14, genomic contig CONTIG_3772_NC14_v4_314_14	--	--	--	--	--	--	--	--	--	--	--	--	--	--	-	-	-	--
CL4361.Contig1_All	1238	0	98	0	3.8601	11.9144	Up	1.11902e-31	5.36786e-30	gi|449487433|ref|XP_004157624.1|	354	3e-96	PREDICTED: isoflavone 2&apos;-hydroxylase-like [Cucumis sativus]	gi|449487432|ref|XM_004157576.1|	196	4e-47	PREDICTED: Cucumis sativus isoflavone 2'-hydroxylase-like (LOC101231376), mRNA	sp|Q9FG65|C81D1_ARATH	251	8e-67	Cytochrome P450 81D1 OS=Arabidopsis thaliana GN=CYP81D1 PE=2 SV=1	alr1450	99	2e-20	COG2124	Cytochrome P450	K00517	2e-71	267	ath:AT4G37360	[EC:1.14.-.-]	GO:0055114//oxidation-reduction process	GO:0020037//heme binding;GO:0033773;GO:0005506//iron ion binding;GO:0009055//electron carrier activity	-	--
Unigene39900_All	267	0	21	0	3.8354	11.9052	Up	2.27038e-07	2.60708e-06	--	--	--	--	gi|325193162|emb|FR824588.1|	149	2e-33	Albugo laibachii Nc14, genomic contig CONTIG_562_NC14_v4_11143_130	--	--	--	--	--	--	--	--	--	--	--	--	--	--	-	-	-	--
Unigene19514_All	204	0	16	0	3.8246	11.9011	Up	8.59986e-06	7.45678e-05	--	--	--	--	--	--	--	--	--	--	--	--	--	--	--	--	--	--	--	--	--	--	-	-	-	--
Unigene3109_All	245	0	19	0	3.7817	11.8848	Up	9.71528e-07	1.00053e-05	gi|449468972|ref|XP_004152195.1|	124.8	4e-28	PREDICTED: palmitoyl-monogalactosyldiacylglycerol delta-7 desaturase, chloroplastic-like [Cucumis sativus] >gi|449515923|ref|XP_004164997.1| PREDICTED: palmitoyl-monogalactosyldiacylglycerol delta-7 desaturase, chloroplastic-like [Cucumis sativus]	gi|449466744|ref|XM_004151038.1|	125	2e-26	PREDICTED: Cucumis sativus palmitoyl-monogalactosyldiacylglycerol delta-7 desaturase, chloroplastic-like (LOC101212673), mRNA	sp|Q949X0|ADS3_ARATH	94.7	1e-20	Palmitoyl-monogalactosyldiacylglycerol delta-7 desaturase, chloroplastic OS=Arabidopsis thaliana GN=ADS3 PE=2 SV=2	sll0541	58.2	4e-09	COG1398	Fatty-acid desaturase	K00507	1e-21	99.4	vvi:100249077	stearoyl-CoA desaturase (delta-9 desaturase) [EC:1.14.19.1]	GO:0006633//fatty acid biosynthetic process;GO:0055114//oxidation-reduction process	GO:0004768//stearoyl-CoA 9-desaturase activity	GO:0016021//integral to membrane	--
Unigene39419_All	336	0	26	0	3.7734	11.8816	Up	5.99384e-09	8.44171e-08	gi|356551028|ref|XP_003543881.1|	76.3	1e-13	PREDICTED: agmatine coumaroyltransferase-like [Glycine max]	--	--	--	--	sp|Q9FNP9|AGCT_ARATH	63.2	3e-11	Agmatine coumaroyltransferase OS=Arabidopsis thaliana GN=ACT PE=1 SV=1	--	--	--	--	--	K14329	5e-11	63.9	aly:ARALYDRAFT_685796	agmatine coumaroyltransferase [EC:2.3.1.64 2.3.1.-]	GO:1901362;GO:0008610//lipid biosynthetic process	GO:0003985//acetyl-CoA C-acetyltransferase activity;GO:0047634//agmatine N4-coumaroyltransferase activity	-	--
Unigene39564_All	209	0	16	0	3.7331	11.8662	Up	8.59986e-06	7.45487e-05	gi|449433195|ref|XP_004134383.1|	116.3	1e-25	PREDICTED: uncharacterized protein LOC101205945 [Cucumis sativus] >gi|449487612|ref|XP_004157713.1| PREDICTED: uncharacterized LOC101205945 [Cucumis sativus]	gi|449433194|ref|XM_004134335.1|	214	3e-53	PREDICTED: Cucumis sativus uncharacterized LOC101205945 (LOC101205945), mRNA >gi|449487611|ref|XM_004157665.1| PREDICTED: Cucumis sativus uncharacterized LOC101205945 (LOC101205945), mRNA	--	--	--	--	--	--	--	--	--	--	--	--	--	--	-	GO:0004672//protein kinase activity	-	--
Unigene39550_All	301	0	23	0	3.7261	11.8635	Up	5.30568e-08	6.63225e-07	gi|449470198|ref|XP_004152805.1|	83.2	1e-15	PREDICTED: probable calcium-binding protein CML10-like [Cucumis sativus]	gi|449470197|ref|XM_004152757.1|	143	1e-31	PREDICTED: Cucumis sativus probable calcium-binding protein CML10-like (LOC101222915), mRNA	--	--	--	--	--	--	--	--	--	--	--	--	--	--	-	-	-	--
Unigene25866_All	477	0	36	0	3.6803	11.8456	Up	4.1775e-12	7.94019e-11	--	--	--	--	--	--	--	--	--	--	--	--	--	--	--	--	--	--	--	--	--	--	-	-	-	--
Unigene39310_All	349	0	26	0	3.6328	11.8269	Up	5.99384e-09	8.44523e-08	gi|449520309|ref|XP_004167176.1|	224.2	5e-58	PREDICTED: sugar transport protein 13-like [Cucumis sativus]	gi|449520308|ref|XM_004167128.1|	303	6e-80	PREDICTED: Cucumis sativus sugar transport protein 13-like (LOC101230074), mRNA	sp|Q94AZ2|STP13_ARATH	197	1e-51	Sugar transport protein 13 OS=Arabidopsis thaliana GN=STP13 PE=1 SV=2	araE	49.7	1e-06	COG0477	Permeases of the major facilitator superfamily	K08150	4e-09	57.8	mtr:MTR_7g005910	MFS transporter, SP family, solute carrier family 2 (myo-inositol transporter), member 13	GO:0055085//transmembrane transport;GO:0015749//monosaccharide transport;GO:0055114//oxidation-reduction process;GO:0009414//response to water deprivation;GO:0009651//response to salt stress;GO:0043090//amino acid import;GO:0009737//response to abscisic acid stimulus	GO:0005358//high-affinity hydrogen:glucose symporter activity;GO:0032440//2-alkenal reductase [NAD(P)] activity	GO:0016021//integral to membrane;GO:0009506//plasmodesma;GO:0005737//cytoplasm;GO:0005886//plasma membrane	--
Unigene39384_All	203	0	15	0	3.6032	11.8151	Up	1.77898e-05	0.00014438	gi|449443107|ref|XP_004139322.1|	93.6	1e-18	PREDICTED: zinc finger Ran-binding domain-containing protein 2-like [Cucumis sativus] >gi|449520649|ref|XP_004167346.1| PREDICTED: zinc finger Ran-binding domain-containing protein 2-like [Cucumis sativus]	gi|449520648|ref|XM_004167298.1|	127	5e-27	PREDICTED: Cucumis sativus zinc finger Ran-binding domain-containing protein 2-like (LOC101203387), mRNA	--	--	--	--	--	--	--	--	--	--	--	--	--	--	GO:0016310//phosphorylation	GO:0016301//kinase activity;GO:0008270//zinc ion binding	GO:0005634//nucleus	--
Unigene40017_All	217	0	16	0	3.5955	11.812	Up	8.59986e-06	7.45391e-05	--	--	--	--	--	--	--	--	--	--	--	--	--	--	--	--	--	--	--	--	--	--	-	-	-	--
Unigene25523_All	248	0	18	0	3.5393	11.7892	Up	2.00972e-06	1.95756e-05	--	--	--	--	--	--	--	--	--	--	--	--	--	--	--	--	--	--	--	--	--	--	-	-	-	--
Unigene39943_All	291	0	21	0	3.519	11.7809	Up	2.27038e-07	2.60841e-06	gi|147798514|emb|CAN74381.1|	63.5	1e-09	hypothetical protein VITISV_007944 [Vitis vinifera]	--	--	--	--	--	--	--	--	--	--	--	--	--	--	--	--	--	--	-	-	-	--
Unigene35641_All	251	0	18	0	3.497	11.7719	Up	2.00972e-06	1.95671e-05	--	--	--	--	--	--	--	--	--	--	--	--	--	--	--	--	--	--	--	--	--	--	-	-	-	--
Unigene39866_All	302	0	21	0	3.3909	11.7275	Up	2.27038e-07	2.60974e-06	gi|38325811|gb|AAR17078.1|	169.1	1e-41	heat shock protein 70-1 [Nicotiana tabacum]	gi|255078173|ref|XM_002502621.1|	188	2e-45	Micromonas sp. RCC299 chromosome 5 heat shock 70 kDa protein (HSP70H) mRNA, complete cds	sp|Q9LHA8|MD37C_ARATH	165	5e-42	Probable mediator of RNA polymerase II transcription subunit 37c OS=Arabidopsis thaliana GN=MED37C PE=1 SV=1	SPAC13G7.02c	173	6e-44	COG0443	Molecular chaperone	K03283	1e-41	165	aly:ARALYDRAFT_897465	heat shock 70kDa protein 1/8	GO:0009615//response to virus;GO:0034976//response to endoplasmic reticulum stress;GO:0006457//protein folding;GO:0009408//response to heat;GO:0009617//response to bacterium;GO:0016567//protein ubiquitination;GO:0046686//response to cadmium ion;GO:0009644//response to high light intensity;GO:0042542//response to hydrogen peroxide	GO:0031625//ubiquitin protein ligase binding;GO:0005524//ATP binding	GO:0005829//cytosol;GO:0005618//cell wall;GO:0005739//mitochondrion;GO:0005774//vacuolar membrane;GO:0005794//Golgi apparatus;GO:0005886//plasma membrane;GO:0048046//apoplast	--
CL3115.Contig1_All	246	0	17	0	3.3699	11.7185	Up	4.15732e-06	3.82194e-05	gi|449503473|ref|XP_004162020.1|	93.2	1e-18	PREDICTED: flavanone 7-O-glucoside 2&apos;&apos;-O-beta-L-rhamnosyltransferase-like [Cucumis sativus]	--	--	--	--	sp|Q5NTH0|UGAT_BELPE	70.5	2e-13	Cyanidin-3-O-glucoside 2-O-glucuronosyltransferase OS=Bellis perennis GN=UGAT PE=1 SV=1	--	--	--	--	--	--	--	--	--	--	-	-	-	--
Unigene40064_All	218	0	15	0	3.3553	11.7122	Up	1.77898e-05	0.000144345	--	--	--	--	--	--	--	--	--	--	--	--	--	--	--	--	--	--	--	--	--	--	-	-	-	--
CL2835.Contig1_All	410	0	28	0	3.3302	11.7014	Up	1.40071e-09	2.12938e-08	gi|449511826|ref|XP_004164064.1|	218.4	2e-56	PREDICTED: G-type lectin S-receptor-like serine/threonine-protein kinase At4g27290-like [Cucumis sativus]	gi|449511827|ref|XM_004164017.1|	155	4e-35	PREDICTED: Cucumis sativus uncharacterized LOC101230426 (LOC101230426), mRNA	sp|Q9S972|SD16_ARATH	184	2e-47	Receptor-like serine/threonine-protein kinase SD1-6 OS=Arabidopsis thaliana GN=SD16 PE=1 SV=2	ML0016_1	52.8	2e-07	COG0515	Serine/threonine protein kinase	K13430	4e-20	94.7	aly:ARALYDRAFT_909268	serine/threonine-protein kinase PBS1 [EC:2.7.11.1]	GO:0048544//recognition of pollen;GO:0006468//protein phosphorylation	GO:0005524//ATP binding;GO:0004674//protein serine/threonine kinase activity	-	--
Unigene6036_All	235	0	16	0	3.3201	11.697	Up	8.59986e-06	7.46348e-05	--	--	--	--	--	--	--	--	--	--	--	--	--	--	--	--	--	--	--	--	--	--	-	-	-	--
Unigene39344_All	235	0	16	0	3.3201	11.697	Up	8.59986e-06	7.46252e-05	--	--	--	--	--	--	--	--	--	--	--	--	--	--	--	--	--	--	--	--	--	--	-	-	-	--
Unigene12398_All	309	0	21	0	3.3141	11.6944	Up	2.27038e-07	2.60885e-06	gi|359475790|ref|XP_003631757.1|	94.4	6e-19	PREDICTED: uncharacterized protein LOC100854461 [Vitis vinifera]	--	--	--	--	sp|Q9LK03|PERK2_ARATH	48.1	1e-06	Proline-rich receptor-like protein kinase PERK2 OS=Arabidopsis thaliana GN=PERK2 PE=2 SV=3	--	--	--	--	--	--	--	--	--	--	-	-	-	--
Unigene9549_All	311	0	21	0	3.2927	11.6851	Up	2.27038e-07	2.60797e-06	gi|449470047|ref|XP_004152730.1|	209.5	1e-53	PREDICTED: uncharacterized protein LOC101204257 [Cucumis sativus] >gi|449496008|ref|XP_004160010.1| PREDICTED: uncharacterized LOC101204257 [Cucumis sativus]	gi|449496007|ref|XM_004159962.1|	434	1e-119	PREDICTED: Cucumis sativus uncharacterized LOC101204257 (LOC101204257), mRNA	--	--	--	--	--	--	--	--	--	--	--	--	--	--	GO:0019375//galactolipid biosynthetic process;GO:0045892//negative regulation of transcription, DNA-dependent;GO:0016036//cellular response to phosphate starvation	GO:0004722//protein serine/threonine phosphatase activity	GO:0005739//mitochondrion;GO:0016020//membrane;GO:0005783//endoplasmic reticulum	--
Unigene36876_All	208	0	14	0	3.2822	11.6804	Up	3.68002e-05	0.000277878	gi|449454394|ref|XP_004144940.1|	83.2	1e-15	PREDICTED: uncharacterized protein LOC101211103 [Cucumis sativus]	gi|449454397|ref|XM_004144894.1|	157	5e-36	PREDICTED: Cucumis sativus uncharacterized LOC101211602 (LOC101211602), mRNA	--	--	--	--	--	--	--	--	--	--	--	--	--	--	-	-	-	--
Unigene40069_All	240	0	16	0	3.2509	11.6666	Up	8.59986e-06	7.45582e-05	--	--	--	--	--	--	--	--	--	--	--	--	--	--	--	--	--	--	--	--	--	--	-	-	-	--
Unigene12879_All	377	0	25	0	3.2337	11.659	Up	1.23989e-08	1.68448e-07	gi|75858823|gb|ABA28988.1|	107.1	8e-23	heat shock protein 70, partial [Symbiodinium sp. C3]	gi|38325810|gb|AY372069.1|	58	7e-06	Nicotiana tabacum heat shock protein 70-1 (HSP70-1) gene, complete cds	sp|P16394|HSP70_BRELC	88.6	9e-19	Heat shock 70 kDa protein OS=Bremia lactucae GN=HSP70 PE=3 SV=1	SPAC13G7.02c	127	4e-30	COG0443	Molecular chaperone	K03283	1e-18	89.4	smo:SELMODRAFT_443120	heat shock 70kDa protein 1/8	-	-	-	--
CL2844.Contig2_All	577	0	38	0	3.2115	11.649	Up	9.76248e-13	1.94298e-11	gi|449438301|ref|XP_004136927.1|	281.6	5e-75	PREDICTED: basic form of pathogenesis-related protein 1-like [Cucumis sativus] >gi|449478785|ref|XP_004155418.1| PREDICTED: basic form of pathogenesis-related protein 1-like [Cucumis sativus]	gi|377347201|dbj|AB698860.1|	216	2e-53	Cucumis melo PR1-1a mRNA for pathogenesis-related protein 1-1a, partial cds, cultivar: Earl's Seinu	sp|P33154|PR1_ARATH	211	2e-55	Pathogenesis-related protein 1 OS=Arabidopsis thaliana GN=At2g14610 PE=1 SV=1	YJL078c_1	99.4	4e-21	COG2340	Uncharacterized protein with SCP/PR1 domains	K13449	6e-63	238	rcu:RCOM_1381930	pathogenesis-related protein 1	-	-	GO:0005576//extracellular region	--
Unigene19520_All	304	0	20	0	3.2082	11.6475	Up	4.69652e-07	5.11411e-06	gi|255563278|ref|XP_002522642.1|	92	3e-18	conserved hypothetical protein [Ricinus communis] >gi|223538118|gb|EEF39729.1| conserved hypothetical protein [Ricinus communis]	--	--	--	--	sp|Q9FPQ6|GP1_CHLRE	50.4	2e-07	Vegetative cell wall protein gp1 OS=Chlamydomonas reinhardtii GN=GP1 PE=2 SV=1	--	--	--	--	--	K01115	4e-06	47.8	vcn:VOLCADRAFT_99471	phospholipase D [EC:3.1.4.4]	-	-	-	--
Unigene40012_All	259	0	17	0	3.2007	11.6442	Up	4.15732e-06	3.82142e-05	--	--	--	--	--	--	--	--	--	--	--	--	--	--	--	--	--	--	--	--	--	--	-	-	-	--
Unigene40390_All	244	0	16	0	3.1976	11.6428	Up	8.59986e-06	7.452e-05	gi|302831580|ref|XP_002947355.1|	137.5	6e-32	hypothetical protein VOLCADRAFT_57006 [Volvox carteri f. nagariensis] >gi|300267219|gb|EFJ51403.1| hypothetical protein VOLCADRAFT_57006 [Volvox carteri f. nagariensis]	gi|226517984|gb|CP001327.1|	63.9	7e-08	Micromonas sp. RCC299 chromosome 6, complete sequence	sp|Q9C6I8|NOG1_ARATH	116	3e-27	Nucleolar GTP-binding protein 1 OS=Arabidopsis thaliana GN=At1g50920 PE=2 SV=1	SPBC651.01c	142	1e-34	COG1084	Predicted GTPase	K06943	4e-33	137	vcn:VOLCADRAFT_57006	nucleolar GTP-binding protein	GO:0015684//ferrous iron transport;GO:0042254//ribosome biogenesis	GO:0015093//ferrous iron transmembrane transporter activity;GO:0005525//GTP binding	GO:0005730//nucleolus;GO:0016021//integral to membrane	--
CL2626.Contig4_All	214	0	14	0	3.1902	11.6394	Up	3.68002e-05	0.000278127	gi|449524116|ref|XP_004169069.1|	84.7	4e-16	PREDICTED: zeatin O-glucosyltransferase-like [Cucumis sativus]	--	--	--	--	sp|Q9ZSK5|ZOG_PHALU	48.1	1e-06	Zeatin O-glucosyltransferase OS=Phaseolus lunatus GN=ZOG1 PE=2 SV=1	--	--	--	--	--	K13495	3e-12	68.2	pop:POPTR_808453	cis-zeatin O-glucosyltransferase [EC:2.4.1.215]	-	GO:0016757//transferase activity, transferring glycosyl groups	-	--
Unigene40089_All	201	0	13	0	3.1539	11.6229	Up	7.61252e-05	0.000531696	--	--	--	--	--	--	--	--	--	--	--	--	--	--	--	--	--	--	--	--	--	--	-	-	-	--
Unigene39612_All	234	0	15	0	3.1259	11.6101	Up	1.77898e-05	0.000144328	--	--	--	--	--	--	--	--	--	--	--	--	--	--	--	--	--	--	--	--	--	--	-	-	-	--
Unigene40030_All	203	0	13	0	3.1228	11.6086	Up	7.61252e-05	0.000531148	--	--	--	--	--	--	--	--	--	--	--	--	--	--	--	--	--	--	--	--	--	--	-	-	-	--
Unigene39633_All	282	0	18	0	3.1126	11.6039	Up	2.00972e-06	1.95953e-05	--	--	--	--	--	--	--	--	--	--	--	--	--	--	--	--	--	--	--	--	--	--	-	-	-	--
Unigene2723_All	282	0	18	0	3.1126	11.6039	Up	2.00972e-06	1.95728e-05	--	--	--	--	--	--	--	--	--	--	--	--	--	--	--	--	--	--	--	--	--	--	-	-	-	--
Unigene36393_All	205	0	13	0	3.0923	11.5945	Up	7.61252e-05	0.000531587	gi|302144063|emb|CBI23168.3|	99.8	1e-20	unnamed protein product [Vitis vinifera]	gi|449488483|ref|XM_004158002.1|	105	2e-20	PREDICTED: Cucumis sativus gibberellin 2-beta-dioxygenase 8-like (LOC101220719), mRNA	sp|O49561|G2OX8_ARATH	86.7	3e-18	Gibberellin 2-beta-dioxygenase 8 OS=Arabidopsis thaliana GN=GA2OX7 PE=1 SV=2	--	--	--	--	--	K00475	2e-07	52	vvi:100233079	naringenin 3-dioxygenase [EC:1.14.11.9]	GO:0055114//oxidation-reduction process	GO:0016707//gibberellin 3-beta-dioxygenase activity;GO:0016702//oxidoreductase activity, acting on single donors with incorporation of molecular oxygen, incorporation of two atoms of oxygen	-	--
Unigene12354_All	347	0	22	0	3.0917	11.5942	Up	1.09754e-07	1.31691e-06	--	--	--	--	--	--	--	--	--	--	--	--	--	--	--	--	--	--	--	--	--	--	-	-	-	--
Unigene40167_All	223	0	14	0	3.0614	11.58	Up	3.68002e-05	0.000277785	--	--	--	--	--	--	--	--	--	--	--	--	--	--	--	--	--	--	--	--	--	--	-	-	-	--
Unigene12338_All	402	0	25	0	3.0326	11.5663	Up	1.23989e-08	1.68414e-07	gi|224062553|ref|XP_002300851.1|	151.4	4e-36	predicted protein [Populus trichocarpa] >gi|222842577|gb|EEE80124.1| predicted protein [Populus trichocarpa]	gi|449462345|ref|XM_004148854.1|	153	2e-34	PREDICTED: Cucumis sativus DNA repair helicase UVH6-like (LOC101205132), mRNA	--	--	--	--	--	--	--	--	--	--	--	--	--	--	-	-	-	--
Unigene22518_All	290	0	18	0	3.0267	11.5635	Up	2.00972e-06	1.95812e-05	--	--	--	--	--	--	--	--	--	--	--	--	--	--	--	--	--	--	--	--	--	--	-	-	-	--
Unigene39584_All	210	0	13	0	3.0187	11.5597	Up	7.61252e-05	0.000531806	--	--	--	--	--	--	--	--	--	--	--	--	--	--	--	--	--	--	--	--	--	--	-	-	-	--
Unigene40047_All	263	0	16	0	2.9666	11.5346	Up	8.59986e-06	7.45965e-05	gi|357455517|ref|XP_003598039.1|	100.1	1e-20	Cellulose synthase [Medicago truncatula] >gi|355487087|gb|AES68290.1| Cellulose synthase [Medicago truncatula]	--	--	--	--	sp|Q651X6|CSLE6_ORYSJ	75.1	9e-15	Cellulose synthase-like protein E6 OS=Oryza sativa subsp. japonica GN=CSLE6 PE=2 SV=1	--	--	--	--	--	K10999	2e-14	75.1	aly:ARALYDRAFT_496689	cellulose synthase A [EC:2.4.1.12]	-	GO:0016757//transferase activity, transferring glycosyl groups	GO:0016020//membrane	--
Unigene40091_All	214	0	13	0	2.9623	11.5325	Up	7.61252e-05	0.000531257	gi|470123314|ref|XP_004297672.1|	68.2	4e-11	PREDICTED: zinc finger protein 5-like [Fragaria vesca subsp. vesca]	gi|297843859|ref|XM_002889765.1|	65.9	2e-08	Arabidopsis lyrata subsp. lyrata zinc finger protein 5, ZFP5, mRNA	sp|Q39264|ZFP5_ARATH	54.7	1e-08	Zinc finger protein 5 OS=Arabidopsis thaliana GN=ZFP5 PE=2 SV=1	--	--	--	--	--	--	--	--	--	--	GO:0010026//trichome differentiation;GO:0048510//regulation of timing of transition from vegetative to reproductive phase;GO:0009740//gibberellic acid mediated signaling pathway	-	-	--
Unigene38617_All	234	0	14	0	2.9175	11.5105	Up	3.68002e-05	0.00027794	--	--	--	--	--	--	--	--	--	--	--	--	--	--	--	--	--	--	--	--	--	--	-	-	-	--
Unigene3083_All	272	0	16	0	2.8685	11.4861	Up	8.59986e-06	7.46061e-05	gi|147806431|emb|CAN67620.1|	70.5	9e-12	hypothetical protein VITISV_004593 [Vitis vinifera]	gi|123654569|emb|AM461661.1|	69.9	1e-09	Vitis vinifera, whole genome shotgun sequence, contig VV78X085526.8, clone ENTAV 115	--	--	--	--	--	--	--	--	--	--	--	--	--	--	-	-	-	--
Unigene9625_All	256	0	15	0	2.8573	11.4804	Up	1.77898e-05	0.000144293	gi|255573400|ref|XP_002527626.1|	64.3	6e-10	Anthocyanin 5-aromatic acyltransferase, putative [Ricinus communis] >gi|223533000|gb|EEF34765.1| Anthocyanin 5-aromatic acyltransferase, putative [Ricinus communis]	--	--	--	--	sp|Q9LRQ7|BAHD2_ARATH	46.2	4e-06	BAHD acyltransferase At3g29680 OS=Arabidopsis thaliana GN=At3g29680 PE=2 SV=1	--	--	--	--	--	--	--	--	--	--	-	GO:0016746//transferase activity, transferring acyl groups	-	--
Unigene2841_All	325	0	19	0	2.8508	11.4772	Up	9.71528e-07	1.00083e-05	gi|449466594|ref|XP_004151011.1|	144.4	5e-34	PREDICTED: uncharacterized protein LOC101214350 [Cucumis sativus] >gi|449522143|ref|XP_004168087.1| PREDICTED: uncharacterized LOC101214350 [Cucumis sativus]	gi|449466593|ref|XM_004150963.1|	99.6	2e-18	PREDICTED: Cucumis sativus uncharacterized LOC101214350 (LOC101214350), mRNA >gi|449522142|ref|XM_004168039.1| PREDICTED: Cucumis sativus uncharacterized LOC101214350 (LOC101214350), mRNA	--	--	--	--	--	--	--	--	--	--	--	--	--	--	GO:0045492//xylan biosynthetic process;GO:0010413//glucuronoxylan metabolic process	-	GO:0005794//Golgi apparatus	--
Unigene19141_All	241	0	14	0	2.8328	11.468	Up	3.68002e-05	0.000278158	--	--	--	--	--	--	--	--	--	--	--	--	--	--	--	--	--	--	--	--	--	--	-	-	-	--
Unigene40335_All	242	0	14	0	2.8211	11.462	Up	3.68002e-05	0.000277692	gi|449470393|ref|XP_004152901.1|	134	6e-31	PREDICTED: putative respiratory burst oxidase homolog protein H-like [Cucumis sativus]	gi|147789065|emb|AM429035.2|	69.9	1e-09	Vitis vinifera contig VV78X068576.4, whole genome shotgun sequence	sp|O48538|RBOHF_ARATH	83.2	3e-17	Respiratory burst oxidase homolog protein F OS=Arabidopsis thaliana GN=RBOHF PE=1 SV=1	--	--	--	--	--	K13447	1e-21	99.4	ppp:PHYPADRAFT_206166	respiratory burst oxidase [EC:1.6.3.- 1.11.1.-]	GO:0022900//electron transport chain	GO:0050664//oxidoreductase activity, acting on NAD(P)H, oxygen as acceptor;GO:0004601//peroxidase activity;GO:0005509//calcium ion binding	GO:0016021//integral to membrane	--
Unigene22618_All	573	0	33	0	2.8084	11.4555	Up	3.69788e-11	6.49691e-10	gi|224121288|ref|XP_002330790.1|	196.8	1e-49	predicted protein [Populus trichocarpa] >gi|222872592|gb|EEF09723.1| predicted protein [Populus trichocarpa]	gi|359488851|ref|XM_002274743.2|	89.7	3e-15	PREDICTED: Vitis vinifera UDP-glycosyltransferase 90A1-like (LOC100247319), mRNA	sp|Q9ZVX4|U90A1_ARATH	137	5e-33	UDP-glycosyltransferase 90A1 OS=Arabidopsis thaliana GN=UGT90A1 PE=2 SV=1	--	--	--	--	--	K13496	2e-28	123	aly:ARALYDRAFT_485691	UDP-glucosyl transferase 73C [EC:2.4.1.-]	-	GO:0016757//transferase activity, transferring glycosyl groups	-	--
Unigene32013_All	278	0	16	0	2.8066	11.4546	Up	8.59986e-06	7.45774e-05	gi|449526948|ref|XP_004170475.1|	162.9	1e-39	PREDICTED: uncharacterized LOC101208423, partial [Cucumis sativus]	gi|449526947|ref|XM_004170427.1|	274	4e-71	PREDICTED: Cucumis sativus uncharacterized LOC101208423 (LOC101208423), partial mRNA	--	--	--	--	--	--	--	--	--	--	--	--	--	--	GO:0006810//transport	GO:0008526//phosphatidylinositol transporter activity	GO:0005622//intracellular	--
Unigene31619_All	296	0	17	0	2.8006	11.4515	Up	4.15732e-06	3.82402e-05	gi|449470164|ref|XP_004152788.1|	115.2	3e-25	PREDICTED: wall-associated receptor kinase-like 14-like [Cucumis sativus] >gi|449496134|ref|XP_004160050.1| PREDICTED: wall-associated receptor kinase-like 14-like [Cucumis sativus]	gi|449470163|ref|XM_004152740.1|	63.9	8e-08	PREDICTED: Cucumis sativus wall-associated receptor kinase-like 14-like (LOC101218893), mRNA >gi|449496133|ref|XM_004160002.1| PREDICTED: Cucumis sativus wall-associated receptor kinase-like 14-like (LOC101228477), mRNA	sp|Q8RY67|WAKLO_ARATH	62.8	5e-11	Wall-associated receptor kinase-like 14 OS=Arabidopsis thaliana GN=WAKL14 PE=2 SV=2	--	--	--	--	--	--	--	--	--	--	GO:0016310//phosphorylation	GO:0004674//protein serine/threonine kinase activity;GO:0000166//nucleotide binding	GO:0005739//mitochondrion	--
Unigene40104_All	227	0	13	0	2.7926	11.4474	Up	7.61252e-05	0.000531422	--	--	--	--	--	--	--	--	--	--	--	--	--	--	--	--	--	--	--	--	--	--	-	-	-	--
Unigene38430_All	245	0	14	0	2.7865	11.4442	Up	3.68002e-05	0.000278003	gi|449449769|ref|XP_004142637.1|	78.6	3e-14	PREDICTED: 1-aminocyclopropane-1-carboxylate oxidase 5-like [Cucumis sativus] >gi|449500668|ref|XP_004161163.1| PREDICTED: 1-aminocyclopropane-1-carboxylate oxidase 5-like [Cucumis sativus]	gi|449500667|ref|XM_004161115.1|	184	3e-44	PREDICTED: Cucumis sativus 1-aminocyclopropane-1-carboxylate oxidase 5-like (LOC101221460), mRNA	sp|Q0WPW4|ACCO5_ARATH	59.3	5e-10	1-aminocyclopropane-1-carboxylate oxidase 5 OS=Arabidopsis thaliana GN=At1g77330 PE=2 SV=1	--	--	--	--	--	K05933	9e-14	73.2	gmx:100796909	aminocyclopropanecarboxylate oxidase [EC:1.14.17.4]	GO:0055114//oxidation-reduction process	GO:0009815//1-aminocyclopropane-1-carboxylate oxidase activity;GO:0016706//oxidoreductase activity, acting on paired donors, with incorporation or reduction of molecular oxygen, 2-oxoglutarate as one donor, and incorporation of one atom each of oxygen into both donors	-	--
Unigene32019_All	443	0	25	0	2.7519	11.4262	Up	1.23989e-08	1.6838e-07	--	--	--	--	--	--	--	--	--	--	--	--	--	--	--	--	--	--	--	--	--	--	-	-	-	--
Unigene2784_All	329	0	18	0	2.6679	11.3815	Up	2.00972e-06	1.95784e-05	gi|449469270|ref|XP_004152344.1|	170.6	6e-42	PREDICTED: palmitoyl-monogalactosyldiacylglycerol delta-7 desaturase, chloroplastic-like [Cucumis sativus]	gi|449469267|ref|XM_004152295.1|	204	4e-50	PREDICTED: Cucumis sativus palmitoyl-monogalactosyldiacylglycerol delta-7 desaturase, chloroplastic-like (LOC101209490), mRNA >gi|449515932|ref|XM_004164954.1| PREDICTED: Cucumis sativus palmitoyl-monogalactosyldiacylglycerol delta-7 desaturase, chloroplastic-like (LOC101225707), mRNA	sp|Q949X0|ADS3_ARATH	129	4e-31	Palmitoyl-monogalactosyldiacylglycerol delta-7 desaturase, chloroplastic OS=Arabidopsis thaliana GN=ADS3 PE=2 SV=2	sll0541	79	2e-15	COG1398	Fatty-acid desaturase	K00507	9e-33	136	rcu:RCOM_0900580	stearoyl-CoA desaturase (delta-9 desaturase) [EC:1.14.19.1]	GO:0006633//fatty acid biosynthetic process;GO:0055114//oxidation-reduction process	GO:0004768//stearoyl-CoA 9-desaturase activity	GO:0016021//integral to membrane	--
Unigene19278_All	311	0	17	0	2.6656	11.3802	Up	4.15732e-06	3.82246e-05	--	--	--	--	--	--	--	--	--	--	--	--	--	--	--	--	--	--	--	--	--	--	-	-	-	--
Unigene15793_All	238	0	13	0	2.6636	11.3792	Up	7.61252e-05	0.000531312	--	--	--	--	--	--	--	--	--	--	--	--	--	--	--	--	--	--	--	--	--	--	-	-	-	--
Unigene38473_All	257	0	14	0	2.6564	11.3753	Up	3.68002e-05	0.000277909	--	--	--	--	--	--	--	--	--	--	--	--	--	--	--	--	--	--	--	--	--	--	-	-	-	--
Unigene40256_All	305	0	16	0	2.5581	11.3209	Up	8.59986e-06	7.4654e-05	--	--	--	--	gi|32992561|dbj|AK107352.1|	119	2e-24	Oryza sativa Japonica Group cDNA clone:002-126-H07, full insert sequence	--	--	--	--	--	--	--	--	--	--	--	--	--	--	-	-	-	--
Unigene32376_All	250	0	13	0	2.5357	11.3082	Up	7.61252e-05	0.000531532	gi|449477933|ref|XP_004155166.1|	50.8	3e-17	PREDICTED: putative RING-H2 finger protein ATL21A-like [Cucumis sativus]	gi|449432053|ref|XM_004133767.1|	79.8	1e-12	PREDICTED: Cucumis sativus putative RING-H2 finger protein ATL21A-like (LOC101210323), mRNA	--	--	--	--	--	--	--	--	--	--	--	--	--	--	-	-	-	--
Unigene31546_All	252	0	13	0	2.5156	11.2967	Up	7.61252e-05	0.000531751	--	--	--	--	--	--	--	--	--	--	--	--	--	--	--	--	--	--	--	--	--	--	-	-	-	--
Unigene34783_All	274	0	14	0	2.4916	11.2829	Up	3.68002e-05	0.000277847	gi|449515748|ref|XP_004164910.1|	141.4	4e-33	PREDICTED: protein YeeZ-like [Cucumis sativus]	gi|449515747|ref|XM_004164862.1|	305	1e-80	PREDICTED: Cucumis sativus protein YeeZ-like (LOC101213235), mRNA	--	--	--	--	CC1055	74.3	5e-14	COG0451	Nucleoside-diphosphate-sugar epimerases	--	--	--	--	--	GO:0044237//cellular metabolic process	GO:0003824//catalytic activity;GO:0050662//coenzyme binding;GO:0000166//nucleotide binding	GO:0009507//chloroplast	--
Unigene25884_All	372	0	19	0	2.4906	11.2823	Up	9.71528e-07	1.00098e-05	gi|449448942|ref|XP_004142224.1|	206.5	1e-52	PREDICTED: myb-related protein 308-like [Cucumis sativus] >gi|449503640|ref|XP_004162103.1| PREDICTED: myb-related protein 308-like [Cucumis sativus]	gi|449503639|ref|XM_004162055.1|	204	5e-50	PREDICTED: Cucumis sativus myb-related protein 308-like (LOC101211508), mRNA	sp|Q9LXV2|MYB46_ARATH	162	4e-41	Transcription factor MYB46 OS=Arabidopsis thaliana GN=MYB46 PE=2 SV=1	ECU11g1690	90.9	5e-19	COG5147	Myb superfamily proteins, including transcription factors and mRNA splicing factors	K09422	2e-44	175	vvi:100243210	myb proto-oncogene protein, plant	GO:0010413//glucuronoxylan metabolic process;GO:0009751//response to salicylic acid stimulus;GO:0045492//xylan biosynthetic process;GO:1901348//positive regulation of secondary cell wall biogenesis;GO:0045893//positive regulation of transcription, DNA-dependent;GO:0050832//defense response to fungus	GO:0003677//DNA binding;GO:0003700//sequence-specific DNA binding transcription factor activity;GO:0003682//chromatin binding	GO:0005634//nucleus	--
CL2698.Contig2_All	577	0	29	0	2.4509	11.2591	Up	6.77124e-10	1.06137e-08	gi|449445379|ref|XP_004140450.1|	343.6	1e-93	PREDICTED: lignin-forming anionic peroxidase-like [Cucumis sativus] >gi|449526369|ref|XP_004170186.1| PREDICTED: lignin-forming anionic peroxidase-like [Cucumis sativus]	gi|449445378|ref|XM_004140402.1|	622	1e-176	PREDICTED: Cucumis sativus lignin-forming anionic peroxidase-like (LOC101213432), mRNA >gi|449526368|ref|XM_004170138.1| PREDICTED: Cucumis sativus lignin-forming anionic peroxidase-like (LOC101227079), mRNA	sp|Q02200|PERX_NICSY	285	2e-77	Lignin-forming anionic peroxidase OS=Nicotiana sylvestris PE=2 SV=1	--	--	--	--	--	K00430	2e-79	293	pop:POPTR_591108	peroxidase [EC:1.11.1.7]	GO:0055114//oxidation-reduction process;GO:0006979//response to oxidative stress	GO:0020037//heme binding;GO:0046872//metal ion binding;GO:0004601//peroxidase activity	-	--
Unigene39289_All	360	0	18	0	2.4382	11.2516	Up	2.00972e-06	1.95643e-05	--	--	--	--	--	--	--	--	--	--	--	--	--	--	--	--	--	--	--	--	--	--	-	-	-	--
Unigene28382_All	282	0	14	0	2.4209	11.2413	Up	3.68002e-05	0.000278096	--	--	--	--	--	--	--	--	--	--	--	--	--	--	--	--	--	--	--	--	--	--	-	-	-	--
CL429.Contig2_All	327	0	16	0	2.386	11.2204	Up	8.59986e-06	7.46444e-05	gi|449464536|ref|XP_004149985.1|	206.8	8e-53	PREDICTED: peroxidase 72-like [Cucumis sativus] >gi|449491412|ref|XP_004158888.1| PREDICTED: peroxidase 72-like [Cucumis sativus]	gi|449464535|ref|XM_004149937.1|	389	1e-105	PREDICTED: Cucumis sativus peroxidase 72-like (LOC101204648), mRNA	sp|Q9FJZ9|PER72_ARATH	179	4e-46	Peroxidase 72 OS=Arabidopsis thaliana GN=PER72 PE=1 SV=1	--	--	--	--	--	K00430	4e-48	187	rcu:RCOM_0533480	peroxidase [EC:1.11.1.7]	GO:0055114//oxidation-reduction process;GO:0006979//response to oxidative stress	GO:0020037//heme binding;GO:0046872//metal ion binding;GO:0004601//peroxidase activity	-	--
Unigene36432_All	516	0	25	0	2.3626	11.2062	Up	1.23989e-08	1.68516e-07	gi|255550579|ref|XP_002516339.1|	53.5	1e-06	hypothetical protein RCOM_1401660 [Ricinus communis] >gi|223544505|gb|EEF46023.1| hypothetical protein RCOM_1401660 [Ricinus communis]	--	--	--	--	--	--	--	--	--	--	--	--	--	--	--	--	--	--	-	-	-	--
Unigene40072_All	291	0	14	0	2.346	11.196	Up	3.68002e-05	0.000277723	--	--	--	--	gi|32992547|dbj|AK107338.1|	67.9	5e-09	Oryza sativa Japonica Group cDNA clone:002-126-F12, full insert sequence	--	--	--	--	--	--	--	--	--	--	--	--	--	--	-	-	-	--
Unigene18845_All	388	0	18	0	2.2622	11.1435	Up	2.00972e-06	1.95925e-05	gi|449432604|ref|XP_004134089.1|	122.5	2e-27	PREDICTED: inhibitor of trypsin and hageman factor-like [Cucumis sativus] >gi|449516591|ref|XP_004165330.1| PREDICTED: inhibitor of trypsin and hageman factor-like [Cucumis sativus]	gi|449432603|ref|XM_004134041.1|	101	5e-19	PREDICTED: Cucumis sativus inhibitor of trypsin and hageman factor-like (LOC101215646), mRNA >gi|449516590|ref|XM_004165282.1| PREDICTED: Cucumis sativus inhibitor of trypsin and hageman factor-like (LOC101225244), mRNA	sp|P19873|ITH5_CUCMA	115	5e-27	Inhibitor of trypsin and hageman factor OS=Cucurbita maxima PE=1 SV=1	--	--	--	--	--	--	--	--	--	--	-	-	-	--
Unigene25654_All	283	0	13	0	2.24	11.1293	Up	7.61252e-05	0.000531202	--	--	--	--	--	--	--	--	--	--	--	--	--	--	--	--	--	--	--	--	--	--	-	-	-	--
Unigene19171_All	351	0	16	0	2.2229	11.1182	Up	8.59986e-06	7.45869e-05	gi|449527529|ref|XP_004170763.1|	198.4	2e-50	PREDICTED: heat stress transcription factor B-2a-like [Cucumis sativus]	gi|449527528|ref|XM_004170715.1|	361	3e-97	PREDICTED: Cucumis sativus heat stress transcription factor B-2a-like (LOC101230166), mRNA	sp|Q93VB5|HFA4D_ORYSJ	115	4e-27	Heat stress transcription factor A-4d OS=Oryza sativa subsp. japonica GN=HSFA4D PE=1 SV=1	YGL073w	77.8	4e-15	COG5169	Heat shock transcription factor	--	--	--	--	--	GO:0050896//response to stimulus;GO:0006355//regulation of transcription, DNA-dependent	GO:0043565//sequence-specific DNA binding;GO:0003700//sequence-specific DNA binding transcription factor activity	GO:0005634//nucleus	--
Unigene16254_All	308	0	14	0	2.2165	11.1141	Up	3.68002e-05	0.000277971	gi|307136287|gb|ADN34114.1|	74.7	4e-13	retrotransposon protein [Cucumis melo subsp. melo]	--	--	--	--	--	--	--	--	--	--	--	--	--	--	--	--	--	--	-	-	-	--
Unigene32131_All	413	0	18	0	2.1253	11.0535	Up	2.00972e-06	1.95869e-05	gi|449503367|ref|XP_004161967.1|	51.2	5e-06	PREDICTED: receptor-like protein 12-like [Cucumis sativus]	gi|449470476|ref|XM_004152895.1|	147	1e-32	PREDICTED: Cucumis sativus serine/threonine-protein kinase BRI1-like 1-like (LOC101218815), mRNA	sp|Q8LPB4|PSKR1_DAUCA	107	3e-24	Phytosulfokine receptor 1 OS=Daucus carota GN=PSKR PE=1 SV=1	MA2301_1	60.8	7e-10	COG4886	Leucine-rich repeat (LRR) protein	K13420	3e-20	95.1	rcu:RCOM_0633880	LRR receptor-like serine/threonine-protein kinase FLS2 [EC:2.7.11.1]	-	-	-	--
Unigene36546_All	299	0	13	0	2.1202	11.05	Up	7.61252e-05	0.000531477	--	--	--	--	--	--	--	--	--	--	--	--	--	--	--	--	--	--	--	--	--	--	-	-	-	--
Unigene21900_All	370	0	16	0	2.1087	11.0421	Up	8.59986e-06	7.46157e-05	--	--	--	--	--	--	--	--	--	--	--	--	--	--	--	--	--	--	--	--	--	--	-	-	-	--
Unigene2156_All	325	0	14	0	2.1006	11.0366	Up	3.68002e-05	0.00027822	--	--	--	--	--	--	--	--	--	--	--	--	--	--	--	--	--	--	--	--	--	--	-	-	-	--
Unigene25898_All	357	0	15	0	2.0489	11.0006	Up	1.77898e-05	0.000144362	--	--	--	--	gi|356517521|ref|XM_003527388.1|	63.9	1e-07	PREDICTED: Glycine max GDSL esterase/lipase EXL3-like (LOC100808475), mRNA	--	--	--	--	--	--	--	--	--	--	--	--	--	--	-	-	-	--
Unigene40215_All	363	0	15	0	2.015	10.9766	Up	1.77898e-05	0.00014431	--	--	--	--	--	--	--	--	--	--	--	--	--	--	--	--	--	--	--	--	--	--	-	-	-	--
Unigene6058_All	318	0	13	0	1.9935	10.9611	Up	7.61252e-05	0.000531861	gi|359478218|ref|XP_003632087.1|	177.6	5e-44	PREDICTED: UDP-glycosyltransferase 74E2-like [Vitis vinifera]	gi|115480180|ref|NM_001070219.1|	93.7	1e-16	Oryza sativa Japonica Group Os09g0518000 (Os09g0518000) mRNA, complete cds	sp|Q9SKC1|U74C1_ARATH	147	1e-36	UDP-glycosyltransferase 74C1 OS=Arabidopsis thaliana GN=UGT74C1 PE=2 SV=1	--	--	--	--	--	K13691	3e-41	164	pop:POPTR_810275	pathogen-inducible salicylic acid glucosyltransferase [EC:2.4.1.-]	GO:0071215//cellular response to abscisic acid stimulus;GO:0070301//cellular response to hydrogen peroxide;GO:0010016//shoot system morphogenesis;GO:0071475//cellular hyperosmotic salinity response;GO:0042631//cellular response to water deprivation;GO:0080024//indolebutyric acid metabolic process;GO:0080167//response to karrikin	GO:0052638//indole-3-butyrate beta-glucosyltransferase activity;GO:0047215//indole-3-acetate beta-glucosyltransferase activity	-	--
Unigene2881_All	368	0	15	0	1.9877	10.9569	Up	1.77898e-05	0.000144397	--	--	--	--	--	--	--	--	--	--	--	--	--	--	--	--	--	--	--	--	--	--	-	-	-	--
Unigene12683_All	352	0	14	0	1.9395	10.9215	Up	3.68002e-05	0.000278189	--	--	--	--	--	--	--	--	--	--	--	--	--	--	--	--	--	--	--	--	--	--	-	-	-	--
CL7352.Contig1_All	404	0	16	0	1.9312	10.9153	Up	8.59986e-06	7.45295e-05	--	--	--	--	--	--	--	--	--	--	--	--	--	--	--	--	--	--	--	--	--	--	-	-	-	--
CL4404.Contig1_All	350	0	13	0	1.8112	10.8227	Up	7.61252e-05	0.000531367	gi|359492520|ref|XP_002284504.2|	118.6	2e-26	PREDICTED: two-component response regulator ARR9-like [Vitis vinifera]	gi|359492519|ref|XM_002284468.2|	83.8	1e-13	PREDICTED: Vitis vinifera two-component response regulator ARR9-like (LOC100259216), mRNA	sp|Q9FPR6|ARR17_ARATH	88.2	1e-18	Two-component response regulator ARR17 OS=Arabidopsis thaliana GN=ARR17 PE=2 SV=1	--	--	--	--	--	K14492	5e-27	117	vvi:100259216	two-component response regulator ARR-A family	GO:0050794//regulation of cellular process	-	-	--
CL4900.Contig4_All	350	0	13	0	1.8112	10.8227	Up	7.61252e-05	0.000531093	--	--	--	--	gi|449498985|ref|XM_004160641.1|	71.9	4e-10	PREDICTED: Cucumis sativus uncharacterized LOC101227119 (LOC101227119), mRNA	--	--	--	--	--	--	--	--	--	--	--	--	--	--	-	-	-	--
CL2859.Contig2_All	403	0	13	0	1.573	10.6193	Up	7.61252e-05	0.000531641	gi|449435870|ref|XP_004135717.1|	151	5e-36	PREDICTED: zinc finger CCCH domain-containing protein 64-like [Cucumis sativus] >gi|449489882|ref|XP_004158448.1| PREDICTED: zinc finger CCCH domain-containing protein 64-like [Cucumis sativus]	gi|449489881|ref|XM_004158400.1|	297	5e-78	PREDICTED: Cucumis sativus zinc finger CCCH domain-containing protein 64-like (LOC101211878), mRNA	sp|Q84WU9|C3H64_ARATH	122	5e-29	Zinc finger CCCH domain-containing protein 64 OS=Arabidopsis thaliana GN=At5g56900 PE=2 SV=1	--	--	--	--	--	--	--	--	--	--	GO:0008152//metabolic process	GO:0003676//nucleic acid binding;GO:0008270//zinc ion binding;GO:0003824//catalytic activity	GO:0005829//cytosol	--
CL3220.Contig4_All	1845	0	57	0	1.5065	10.557	Up	9.80988e-19	2.81068e-17	gi|343466179|gb|AEM42983.1|	233.4	0	cytochrome P450 [Siraitia grosvenorii]	gi|343466178|gb|HQ128568.1|	2434	0	Siraitia grosvenorii cytochrome P450 (P450-2) mRNA, complete cds	sp|Q7XU38|C87A3_ORYSJ	324	3e-121	Cytochrome P450 87A3 OS=Oryza sativa subsp. japonica GN=CYP87A3 PE=2 SV=3	slr0574	103	1e-33	COG2124	Cytochrome P450	K00030	1e-108	392	vvi:100242228	isocitrate dehydrogenase (NAD+) [EC:1.1.1.41]	-	GO:0046872//metal ion binding;GO:0004497//monooxygenase activity;GO:0016705//oxidoreductase activity, acting on paired donors, with incorporation or reduction of molecular oxygen	GO:0016020//membrane	--
CL7014.Contig3_All	1371	0	41	0	1.4583	10.5101	Up	1.10287e-13	2.35222e-12	gi|1170239|sp|P42044.1|HEMH_CUCSA	648.3	0	RecName: Full=Ferrochelatase-2, chloroplastic; AltName: Full=Ferrochelatase II; AltName: Full=Heme synthase 2; AltName: Full=Protoheme ferro-lyase 2; Flags: Precursor >gi|474968|dbj|BAA05102.1| ferrochelatase [Cucumis sativus]	gi|449494412|ref|XR_180986.1|	1318	0	PREDICTED: Cucumis sativus ferrochelatase-2, chloroplastic-like (LOC101216568), misc_RNA	sp|P42044|HEMH_CUCSA	648	0	Ferrochelatase-2, chloroplastic OS=Cucumis sativus GN=HEMH PE=2 SV=1	alr3751	340	4e-93	COG0276	Protoheme ferro-lyase (ferrochelatase)	K01772	1e-162	570	rcu:RCOM_0798270	ferrochelatase [EC:4.99.1.1]	GO:0009611//response to wounding;GO:0006944//cellular membrane fusion;GO:0010363//regulation of plant-type hypersensitive response;GO:0006783//heme biosynthetic process;GO:0006355//regulation of transcription, DNA-dependent;GO:0006612//protein targeting to membrane;GO:0043069//negative regulation of programmed cell death;GO:0045727//positive regulation of translation;GO:0006468//protein phosphory…	GO:0005515//protein binding;GO:0004325//ferrochelatase activity;GO:0004713//protein tyrosine kinase activity;GO:0004674//protein serine/threonine kinase activity;GO:0005524//ATP binding	GO:0009507//chloroplast;GO:0005634//nucleus;GO:0005739//mitochondrion	--
CL3390.Contig1_All	526	0	14	0	1.2979	10.342	Up	3.68002e-05	0.000277816	gi|449436577|ref|XP_004136069.1|	75.5	4e-13	PREDICTED: uncharacterized protein LOC101218908 [Cucumis sativus] >gi|449524144|ref|XP_004169083.1| PREDICTED: uncharacterized protein LOC101224500 [Cucumis sativus]	gi|449524143|ref|XM_004169035.1|	161	9e-37	PREDICTED: Cucumis sativus uncharacterized LOC101224500 (LOC101224500), mRNA	--	--	--	--	--	--	--	--	--	--	--	--	--	--	-	-	-	--
CL676.Contig1_All	1476	0	35	0	1.1563	10.1753	Up	8.64164e-12	1.59759e-10	gi|462418899|gb|EMJ23162.1|	154.5	4e-36	hypothetical protein PRUPE_ppa001788mg [Prunus persica]	gi|359477925|ref|XM_002263145.2|	93.7	5e-16	PREDICTED: Vitis vinifera methyltransferase-like protein 13-like (LOC100258907), mRNA	--	--	--	--	--	--	--	--	--	--	--	--	--	--	-	-	-	--
CL4696.Contig2_All	624	0	14	0	1.0941	10.0955	Up	3.68002e-05	0.000277754	gi|449444839|ref|XP_004140181.1|	129.8	3e-29	PREDICTED: uncharacterized protein LOC101202835 [Cucumis sativus] >gi|449524408|ref|XP_004169215.1| PREDICTED: uncharacterized LOC101202835 [Cucumis sativus]	gi|449524407|ref|XM_004169167.1|	218	5e-54	PREDICTED: Cucumis sativus uncharacterized LOC101202835 (LOC101202835), mRNA	--	--	--	--	--	--	--	--	--	--	--	--	--	--	-	-	-	--
Unigene22856_All	1228	0	18	0	0.7148	9.4814	Up	2.00972e-06	1.9584e-05	gi|225434421|ref|XP_002272040.1|	390.2	3e-107	PREDICTED: probable WRKY transcription factor 33-like [Vitis vinifera]	gi|449529300|ref|XM_004171590.1|	212	6e-52	PREDICTED: Cucumis sativus probable WRKY transcription factor 33-like (LOC101205221), mRNA	sp|Q8S8P5|WRK33_ARATH	300	9e-82	Probable WRKY transcription factor 33 OS=Arabidopsis thaliana GN=WRKY33 PE=1 SV=2	--	--	--	--	--	K13424	3e-108	390	vvi:100243352	WRKY transcription factor 33	-	-	-	--
CL9056.Contig7_All	1287	0	14	0	0.5305	9.05121	Up	3.68002e-05	0.000278065	gi|449453610|ref|XP_004144549.1|	511.1	1e-143	PREDICTED: nudix hydrolase 2-like [Cucumis sativus] >gi|449521926|ref|XP_004167980.1| PREDICTED: nudix hydrolase 2-like [Cucumis sativus]	gi|449453609|ref|XM_004144501.1|	799	0	PREDICTED: Cucumis sativus nudix hydrolase 2-like (LOC101214407), mRNA >gi|449521925|ref|XM_004167932.1| PREDICTED: Cucumis sativus nudix hydrolase 2-like (LOC101231841), mRNA	sp|Q94B74|NUDT2_ARATH	309	2e-84	Nudix hydrolase 2 OS=Arabidopsis thaliana GN=NUDT2 PE=1 SV=1	--	--	--	--	--	--	--	--	--	--	-	GO:0000210//NAD+ diphosphatase activity	-	--
CL99.Contig6_All	1431	0	14	0	0.4771	8.89815	Up	3.68002e-05	0.000278034	gi|449456693|ref|XP_004146083.1|	78.2	4e-13	PREDICTED: probable LRR receptor-like serine/threonine-protein kinase At1g53440-like [Cucumis sativus] >gi|449521066|ref|XP_004167552.1| PREDICTED: probable LRR receptor-like serine/threonine-protein kinase At1g53440-like [Cucumis sativus]	gi|449456692|ref|XM_004146035.1|	708	0	PREDICTED: Cucumis sativus probable LRR receptor-like serine/threonine-protein kinase At1g53440-like (LOC101222014), mRNA >gi|449521065|ref|XM_004167504.1| PREDICTED: Cucumis sativus probable LRR receptor-like serine/threonine-protein kinase At1g53440-like (LOC101225174), mRNA	sp|C0LGG9|Y5344_ARATH	406	2e-113	Probable LRR receptor-like serine/threonine-protein kinase At1g53440 OS=Arabidopsis thaliana GN=At1g53440 PE=1 SV=2	YAR019c	72	2e-12	COG0515	Serine/threonine protein kinase	K13416	1e-54	212	aly:ARALYDRAFT_491347	brassinosteroid insensitive 1-associated receptor kinase 1 [EC:2.7.10.1 2.7.11.1]	GO:0055114//oxidation-reduction process;GO:0000186//activation of MAPKK activity	GO:0005524//ATP binding;GO:0004709//MAP kinase kinase kinase activity;GO:0032440//2-alkenal reductase [NAD(P)] activity	GO:0005886//plasma membrane	--
CL1113.Contig14_All	4228	0	23	0	0.2653	8.05148	Up	5.30568e-08	6.63593e-07	gi|449450361|ref|XP_004142931.1|	420.2	1e-115	PREDICTED: heat shock factor protein HSF30-like [Cucumis sativus] >gi|449494431|ref|XP_004159544.1| PREDICTED: heat shock factor protein HSF30-like [Cucumis sativus]	gi|449494430|ref|XM_004159496.1|	543	1e-151	PREDICTED: Cucumis sativus heat shock factor protein HSF30-like (LOC101219171), mRNA	sp|P41152|HSF30_SOLPE	260	4e-69	Heat shock factor protein HSF30 OS=Solanum peruvianum GN=HSF30 PE=2 SV=1	--	--	--	--	--	K11323	2e-06	53.9	vcn:VOLCADRAFT_121342	histone arginine demethylase JMJD6 [EC:1.14.11.-]	GO:0031348//negative regulation of defense response;GO:0009595//detection of biotic stimulus;GO:0010119//regulation of stomatal movement;GO:0009867//jasmonic acid mediated signaling pathway;GO:0009697//salicylic acid biosynthetic process;GO:0009862//systemic acquired resistance, salicylic acid mediated signaling pathway;GO:0006944//cellular membrane fusion;GO:0010363//regulation of plant-type hyp…	GO:0003677//DNA binding;GO:0005516//calmodulin binding	GO:0005737//cytoplasm;GO:0005634//nucleus	--
CL5952.Contig2_All	580	1	152	0.0787	12.7795	7.34325	Up	8.0441e-47	5.55923e-45	gi|343466177|gb|AEM42982.1|	138.7	5e-32	cucurbitadienol synthase [Siraitia grosvenorii]	gi|343466176|gb|HQ128567.1|	444	1e-122	Siraitia grosvenorii cucurbitadienol synthase mRNA, complete cds	sp|Q6BE24|CUCS_CUCPE	105	1e-23	Cucurbitadienol synthase OS=Cucurbita pepo GN=CPQ PE=1 SV=1	--	--	--	--	--	K01853	4e-12	69.3	gmx:548054	cycloartenol synthase [EC:5.4.99.8]	-	-	-	--
Unigene18521_All	469	12	1808	1.1676	187.985	7.33093	Up	0	0	gi|297741442|emb|CBI32573.3|	63.9	1e-09	unnamed protein product [Vitis vinifera]	--	--	--	--	--	--	--	--	--	--	--	--	--	--	--	--	--	--	-	-	-	--
CL5599.Contig2_All	346	1	111	0.1319	15.6439	6.89001	Up	5.18578e-34	2.64929e-32	gi|449533204|ref|XP_004173566.1|	194.5	4e-49	PREDICTED: extensin-3-like, partial [Cucumis sativus]	gi|449533203|ref|XM_004173518.1|	260	8e-67	PREDICTED: Cucumis sativus extensin-3-like (LOC101212064), partial mRNA	sp|Q9FS16|EXTN3_ARATH	143	3e-35	Extensin-3 OS=Arabidopsis thaliana GN=EXT3 PE=2 SV=3	Rv2560	53.5	9e-08	COG5473	Predicted integral membrane protein	K01115	3e-15	78.2	rcu:RCOM_1613030	phospholipase D [EC:3.1.4.4]	GO:0043161//proteasomal ubiquitin-dependent protein catabolic process;GO:0009753//response to jasmonic acid stimulus;GO:0043248//proteasome assembly;GO:0048767//root hair elongation;GO:0009735//response to cytokinin stimulus;GO:0051788//response to misfolded protein;GO:0009611//response to wounding;GO:0009751//response to salicylic acid stimulus;GO:0009737//response to abscisic acid stimulus;GO:0…	GO:0005199//structural constituent of cell wall	-	--
Unigene14808_All	1097	2	216	0.0832	9.6016	6.85055	Up	4.0423e-65	3.81585e-63	--	--	--	--	--	--	--	--	--	--	--	--	--	--	--	--	--	--	--	--	--	--	-	-	-	--
Unigene2168_All	583	1	107	0.0783	8.9498	6.8367	Up	9.16238e-33	4.51039e-31	gi|449444508|ref|XP_004140016.1|	182.2	4e-45	PREDICTED: myb-related protein Zm1-like [Cucumis sativus] >gi|449516209|ref|XP_004165140.1| PREDICTED: myb-related protein Zm1-like [Cucumis sativus]	gi|357507210|ref|XM_003623846.1|	71.9	7e-10	Medicago truncatula MYB transcription factor (MTR_7g076740) mRNA, complete cds	sp|P20024|MYB1_MAIZE	66.6	9e-12	Myb-related protein Zm1 OS=Zea mays PE=2 SV=1	--	--	--	--	--	K09422	3e-22	102	rcu:RCOM_1574830	myb proto-oncogene protein, plant	GO:0044238//primary metabolic process;GO:0019438//aromatic compound biosynthetic process;GO:0034645//cellular macromolecule biosynthetic process;GO:0071554//cell wall organization or biogenesis;GO:1901362;GO:0050794//regulation of cellular process	-	-	--
CL217.Contig1_All	629	1	104	0.0725	8.0627	6.79714	Up	7.8891e-32	3.79513e-30	gi|76262498|gb|ABA41399.1|	125.2	7e-28	pherophorin-C1 protein precursor [Chlamydomonas reinhardtii]	gi|195614051|gb|EU956738.1|	67.9	1e-08	Zea mays clone 1572186 50S ribosomal protein L13 mRNA, complete cds	sp|Q9T0K5|LRX3_ARATH	143	7e-35	Leucine-rich repeat extensin-like protein 3 OS=Arabidopsis thaliana GN=LRX3 PE=1 SV=1	XF0818	99	6e-21	COG2730	Endoglucanase	K01115	4e-32	135	vcn:VOLCADRAFT_99471	phospholipase D [EC:3.1.4.4]	-	-	-	--
Unigene8067_All	1808	488	43233	12.3169	1166.05	6.56484	Up	0	0	gi|343466185|gb|AEM42986.1|	963.4	0	cytochrome P450 [Siraitia grosvenorii]	gi|343466182|gb|HQ128570.1|	3221	0	Siraitia grosvenorii cytochrome P450 (P450-4) mRNA, complete cds	sp|Q7XU38|C87A3_ORYSJ	411	7e-115	Cytochrome P450 87A3 OS=Oryza sativa subsp. japonica GN=CYP87A3 PE=2 SV=3	slr0574	154	6e-37	COG2124	Cytochrome P450	K00030	7e-131	466	vvi:100242228	isocitrate dehydrogenase (NAD+) [EC:1.1.1.41]	-	GO:0046872//metal ion binding;GO:0016491//oxidoreductase activity	-	--
CL8243.Contig1_All	380	1	85	0.1201	10.9077	6.50497	Up	6.45604e-26	2.55628e-24	gi|118485114|gb|ABK94420.1|	63.9	8e-10	unknown [Populus trichocarpa]	gi|332640072|gb|CP002686.1|	58	7e-06	Arabidopsis thaliana chromosome 3, complete sequence	sp|Q688R1|MTP1_ORYSJ	66.6	4e-12	Metal tolerance protein 1 OS=Oryza sativa subsp. japonica GN=MTP1 PE=2 SV=1	PM0926	91.3	4e-19	COG4531	ABC-type Zn2+ transport system, periplasmic component/surface adhesin	K14689	1e-19	92.8	vcn:VOLCADRAFT_63715	solute carrier family 30 (zinc transporter), member 2	-	-	-	--
CL4361.Contig2_All	2108	12	993	0.2598	22.9709	6.46626	Up	2.51902e-290	9.95661e-288	gi|449445804|ref|XP_004140662.1|	827	0	PREDICTED: isoflavone 2&apos;-hydroxylase-like [Cucumis sativus]	gi|449487432|ref|XM_004157576.1|	305	1e-79	PREDICTED: Cucumis sativus isoflavone 2'-hydroxylase-like (LOC101231376), mRNA	sp|P93147|C81E1_GLYEC	537	8e-153	Isoflavone 2'-hydroxylase OS=Glycyrrhiza echinata GN=CYP81E1 PE=1 SV=2	alr1450	120	7e-27	COG2124	Cytochrome P450	K00517	1e-151	535	ath:AT4G37360	[EC:1.14.-.-]	-	GO:0046872//metal ion binding;GO:0016705//oxidoreductase activity, acting on paired donors, with incorporation or reduction of molecular oxygen;GO:0004497//monooxygenase activity	-	--
CL6284.Contig2_All	309	1	81	0.1477	12.7828	6.43539	Up	1.1284e-24	4.27988e-23	gi|225434678|ref|XP_002280416.1|	172.6	1e-42	PREDICTED: laccase-4 [Vitis vinifera] >gi|297745946|emb|CBI16002.3| unnamed protein product [Vitis vinifera]	gi|356498931|ref|XM_003518252.1|	167	8e-39	PREDICTED: Glycine max laccase-4-like (LOC100799138), mRNA	sp|O80434|LAC4_ARATH	161	7e-41	Laccase-4 OS=Arabidopsis thaliana GN=IRX12 PE=2 SV=2	YMR058w	69.7	1e-12	COG2132	Putative multicopper oxidases	K00423	4e-18	87.8	ath:AT5G21100	L-ascorbate oxidase [EC:1.10.3.3]	GO:0009834//secondary cell wall biogenesis;GO:0046274//lignin catabolic process;GO:0055114//oxidation-reduction process	GO:0005507//copper ion binding;GO:0052716//hydroquinone:oxygen oxidoreductase activity;GO:0008447//L-ascorbate oxidase activity	GO:0048046//apoplast	--
CL7477.Contig1_All	1152	3	237	0.1188	10.0322	6.39996	Up	4.7479e-70	4.81841e-68	gi|449463984|ref|XP_004149709.1|	440.7	2e-122	PREDICTED: putative copper-transporting ATPase HMA5-like [Cucumis sativus] >gi|449508310|ref|XP_004163278.1| PREDICTED: putative copper-transporting ATPase HMA5-like [Cucumis sativus]	gi|224057464|ref|XM_002299198.1|	119	7e-24	Populus trichocarpa heavy metal ATPase, mRNA	sp|Q9S7J8|HMA7_ARATH	293	2e-79	Copper-transporting ATPase RAN1 OS=Arabidopsis thaliana GN=RAN1 PE=1 SV=1	CAC3655	218	1e-56	COG2217	Cation transport ATPase	K01533	8e-108	388	pop:POPTR_547880	Cu2+-exporting ATPase [EC:3.6.3.4]	GO:0060003//copper ion export	GO:0005507//copper ion binding;GO:0004008//copper-exporting ATPase activity;GO:0005524//ATP binding	GO:0016021//integral to membrane	--
CL4435.Contig1_All	639	1	77	0.0714	5.8761	6.36279	Up	1.96776e-23	7.10843e-22	gi|449440447|ref|XP_004137996.1|	300.4	1e-80	PREDICTED: leucoanthocyanidin dioxygenase-like [Cucumis sativus] >gi|449524760|ref|XP_004169389.1| PREDICTED: leucoanthocyanidin dioxygenase-like [Cucumis sativus]	gi|449440446|ref|XM_004137948.1|	424	1e-116	PREDICTED: Cucumis sativus leucoanthocyanidin dioxygenase-like (LOC101220578), mRNA >gi|449524759|ref|XM_004169341.1| PREDICTED: Cucumis sativus leucoanthocyanidin dioxygenase-like (LOC101220578), mRNA	sp|D4N501|DIOX2_PAPSO	153	9e-38	Probable 2-oxoglutarate/Fe(II)-dependent dioxygenase OS=Papaver somniferum GN=DIOX2 PE=2 SV=1	PA4191	82.4	6e-16	COG3491	Isopenicillin N synthase and related dioxygenases	K06892	9e-34	141	pop:POPTR_550478		GO:0051555//flavonol biosynthetic process;GO:0055114//oxidation-reduction process	GO:0045431//flavonol synthase activity;GO:0005506//iron ion binding;GO:0016702//oxidoreductase activity, acting on single donors with incorporation of molecular oxygen, incorporation of two atoms of oxygen	GO:0005737//cytoplasm	--
Unigene22476_All	362	3	225	0.3782	30.3091	6.32446	Up	2.50086e-66	2.41128e-64	gi|359492520|ref|XP_002284504.2|	69.7	1e-11	PREDICTED: two-component response regulator ARR9-like [Vitis vinifera]	gi|449529113|ref|XM_004171498.1|	75.8	3e-11	PREDICTED: Cucumis sativus two-component response regulator ARR9-like (LOC101231209), partial mRNA	sp|O80366|ARR9_ARATH	52.8	5e-08	Two-component response regulator ARR9 OS=Arabidopsis thaliana GN=ARR9 PE=1 SV=1	--	--	--	--	--	K14492	1e-12	69.7	vvi:100259216	two-component response regulator ARR-A family	GO:0000160//two-component signal transduction system (phosphorelay);GO:0035556//intracellular signal transduction;GO:0006355//regulation of transcription, DNA-dependent	GO:0000156//phosphorelay response regulator activity	-	--
CL6525.Contig1_All	798	463	29889	26.4763	1826.45	6.10819	Up	0	0	--	--	--	--	gi|349713299|emb|FQ391467.1|	61.9	9e-07	Vitis vinifera clone SS0AP1YL14	--	--	--	--	--	--	--	--	--	--	--	--	--	--	-	-	-	--
Unigene12487_All	616	1	64	0.0741	5.0664	6.09534	Up	2.09272e-19	6.24205e-18	gi|449446079|ref|XP_004140799.1|	107.8	1e-22	PREDICTED: uncharacterized protein LOC101222158 [Cucumis sativus]	--	--	--	--	sp|Q94C59|PATL4_ARATH	52.8	2e-07	Patellin-4 OS=Arabidopsis thaliana GN=PATL4 PE=1 SV=2	tolA	57.8	1e-08	COG3064	Membrane protein involved in colicin uptake	K03243	1e-09	61.2	cre:CHLREDRAFT_141272	translation initiation factor 5B	-	-	-	--
Unigene15704_All	965	1	62	0.0473	3.133	6.04956	Up	8.68752e-19	2.49864e-17	gi|356507909|ref|XP_003522705.1|	364.8	1e-99	PREDICTED: probable peptide transporter At1g52190-like [Glycine max]	gi|224141756|ref|XM_002324195.1|	71.9	1e-09	Populus trichocarpa predicted protein, mRNA	sp|Q9M817|PTR6_ARATH	321	5e-88	Probable peptide transporter At1g52190 OS=Arabidopsis thaliana GN=At1g52190 PE=1 SV=1	ECU11g1050	52	2e-06	COG3104	Dipeptide/tripeptide permease	K14638	3e-53	206	pop:POPTR_804521	solute carrier family 15 (peptide/histidine transporter), member 3/4	GO:0006810//transport	-	GO:0016020//membrane	--
Unigene12339_All	231	3	170	0.5926	35.8869	5.92025	Up	2.52622e-49	1.8242e-47	--	--	--	--	--	--	--	--	--	--	--	--	--	--	--	--	--	--	--	--	--	--	-	-	-	--
CL6525.Contig2_All	208	2	109	0.4388	25.5542	5.86385	Up	6.3604e-32	3.07286e-30	--	--	--	--	--	--	--	--	--	--	--	--	--	--	--	--	--	--	--	--	--	--	-	-	-	--
Unigene39783_All	303	1	54	0.1506	8.6906	5.85066	Up	2.55404e-16	6.45086e-15	--	--	--	--	--	--	--	--	--	--	--	--	--	--	--	--	--	--	--	--	--	--	-	-	-	--
CL3406.Contig3_All	689	4	213	0.2649	15.0751	5.83058	Up	3.69434e-61	3.27257e-59	gi|449531531|ref|XP_004172739.1|	449.5	2e-125	PREDICTED: trans-cinnamate 4-monooxygenase-like [Cucumis sativus]	gi|449531530|ref|XM_004172691.1|	741	0	PREDICTED: Cucumis sativus trans-cinnamate 4-monooxygenase-like (LOC101204747), mRNA	sp|Q42797|TCMO_SOYBN	304	3e-83	Trans-cinnamate 4-monooxygenase OS=Glycine max GN=CYP73A11 PE=2 SV=1	alr1450	88.6	9e-18	COG2124	Cytochrome P450	K00487	1e-116	417	gmx:100812188	trans-cinnamate 4-monooxygenase [EC:1.14.13.11]	GO:0055114//oxidation-reduction process	GO:0020037//heme binding;GO:0016710//trans-cinnamate 4-monooxygenase activity;GO:0005506//iron ion binding;GO:0009055//electron carrier activity	-	--
Unigene2679_All	621	2	98	0.147	7.6954	5.71011	Up	1.53651e-28	6.70009e-27	gi|449436427|ref|XP_004135994.1|	255.4	4e-67	PREDICTED: uncharacterized protein LOC101221516 [Cucumis sativus] >gi|449505322|ref|XP_004162435.1| PREDICTED: uncharacterized LOC101221516 [Cucumis sativus]	gi|449505321|ref|XM_004162387.1|	161	1e-36	PREDICTED: Cucumis sativus uncharacterized LOC101221516 (LOC101221516), mRNA	sp|Q9FPQ6|GP1_CHLRE	63.9	7e-11	Vegetative cell wall protein gp1 OS=Chlamydomonas reinhardtii GN=GP1 PE=2 SV=1	Rv3876	53.1	3e-07	COG0455	ATPases involved in chromosome partitioning	K01115	6e-09	58.9	vcn:VOLCADRAFT_99471	phospholipase D [EC:3.1.4.4]	-	-	-	--
Unigene38327_All	308	1	46	0.1482	7.2829	5.6189	Up	7.36034e-14	1.58837e-12	gi|302141801|emb|CBI19004.3|	87.4	7e-17	unnamed protein product [Vitis vinifera]	gi|356515914|ref|XM_003526594.1|	91.7	4e-16	PREDICTED: Glycine max two-component response regulator ARR9-like (LOC100786187), mRNA	sp|O80366|ARR9_ARATH	67.4	2e-12	Two-component response regulator ARR9 OS=Arabidopsis thaliana GN=ARR9 PE=1 SV=1	--	--	--	--	--	K14492	4e-18	87.8	vvi:100259216	two-component response regulator ARR-A family	GO:0035556//intracellular signal transduction;GO:0000160//two-component signal transduction system (phosphorelay);GO:0006355//regulation of transcription, DNA-dependent	GO:0000156//phosphorelay response regulator activity	-	--
Unigene21386_All	623	114	5171	8.3502	404.748	5.59907	Up	0	0	gi|449467541|ref|XP_004151481.1|	68.9	6e-11	PREDICTED: uncharacterized protein LOC101212185 [Cucumis sativus]	gi|449467540|ref|XM_004151433.1|	60	3e-06	PREDICTED: Cucumis sativus uncharacterized LOC101212185 (LOC101212185), mRNA	--	--	--	--	--	--	--	--	--	--	--	--	--	--	-	-	-	--
CL4404.Contig2_All	428	1	45	0.1066	5.127	5.58784	Up	1.49145e-13	3.15412e-12	gi|359492520|ref|XP_002284504.2|	169.1	1e-41	PREDICTED: two-component response regulator ARR9-like [Vitis vinifera]	gi|356515914|ref|XM_003526594.1|	91.7	6e-16	PREDICTED: Glycine max two-component response regulator ARR9-like (LOC100786187), mRNA	sp|O80366|ARR9_ARATH	117	2e-27	Two-component response regulator ARR9 OS=Arabidopsis thaliana GN=ARR9 PE=1 SV=1	--	--	--	--	--	K14492	3e-40	161	vvi:100259216	two-component response regulator ARR-A family	GO:0000160//two-component signal transduction system (phosphorelay);GO:0009735//response to cytokinin stimulus;GO:0006355//regulation of transcription, DNA-dependent	GO:0003677//DNA binding;GO:0000156//phosphorelay response regulator activity	-	--
Unigene23824_All	1695	96	4305	2.5845	123.852	5.58258	Up	0	0	gi|307135813|gb|ADN33685.1|	630.2	3e-179	3&apos;-N-debenzoyl-2&apos;-deoxytaxol N-benzoyltransferase [Cucumis melo subsp. melo]	gi|449445611|ref|XM_004140518.1|	127	4e-26	PREDICTED: Cucumis sativus BAHD acyltransferase At5g47980-like (LOC101204287), mRNA >gi|449487368|ref|XM_004157544.1| PREDICTED: Cucumis sativus BAHD acyltransferase At5g47980-like (LOC101223773), mRNA	sp|Q9FI40|BAHD1_ARATH	255	5e-68	BAHD acyltransferase At5g47980 OS=Arabidopsis thaliana GN=BAHD1 PE=2 SV=1	--	--	--	--	--	K13065	2e-31	135	vvi:100265530	shikimate O-hydroxycinnamoyltransferase [EC:2.3.1.133]	-	GO:0016740//transferase activity	-	--
Unigene14732_All	1008	2	86	0.0905	4.1604	5.52266	Up	7.33398e-25	2.80848e-23	gi|357515699|ref|XP_003628138.1|	304.3	2e-81	Anthocyanidin 3-O-glucosyltransferase [Medicago truncatula] >gi|355522160|gb|AET02614.1| Anthocyanidin 3-O-glucosyltransferase [Medicago truncatula]	gi|319759265|gb|HQ219047.1|	61.9	1e-06	Pueraria montana var. lobata glycosyltransferase GT14A05 mRNA, complete cds	sp|D4Q9Z4|SGT2_SOYBN	293	8e-80	Soyasapogenol B glucuronide galactosyltransferase OS=Glycine max GN=GmSGT2 PE=1 SV=1	--	--	--	--	--	K13496	4e-64	243	ath:AT2G36790	UDP-glucosyl transferase 73C [EC:2.4.1.-]	-	GO:0016757//transferase activity, transferring glycosyl groups	-	--
CL2871.Contig2_All	699	7	298	0.457	20.7892	5.5075	Up	3.82152e-83	4.49987e-81	gi|449463304|ref|XP_004149374.1|	230.7	1e-59	PREDICTED: uncharacterized protein LOC101206169 [Cucumis sativus]	gi|449531349|ref|XM_004172601.1|	224	1e-55	PREDICTED: Cucumis sativus uncharacterized LOC101206169 (LOC101206169), mRNA	sp|Q9C6S1|FH14_ARATH	36.6	5e-06	Formin-like protein 14 OS=Arabidopsis thaliana GN=FH14 PE=3 SV=3	--	--	--	--	--	--	--	--	--	--	-	-	GO:0005739//mitochondrion;GO:0009536//plastid	--
Unigene22755_All	409	1	42	0.1116	5.0075	5.48768	Up	1.23759e-12	2.4437e-11	gi|147800031|emb|CAN74973.1|	162.5	1e-39	hypothetical protein VITISV_001042 [Vitis vinifera]	gi|310753566|gb|GU136551.1|	107	9e-21	Pisum sativum clone cID58-2 centromeric retrotransposon PiSat1-2 mutant gag-pol polyprotein gene, complete cds	--	--	--	--	SPAC9.04	52.8	2e-07	COG2801	Transposase and inactivated derivatives	--	--	--	--	--	-	-	-	--
Unigene16169_All	272	1	41	0.1678	7.3504	5.45301	Up	2.50312e-12	4.82829e-11	gi|449469272|ref|XP_004152345.1|	177.9	4e-44	PREDICTED: palmitoyl-monogalactosyldiacylglycerol delta-7 desaturase, chloroplastic-like [Cucumis sativus] >gi|449515929|ref|XP_004165000.1| PREDICTED: palmitoyl-monogalactosyldiacylglycerol delta-7 desaturase, chloroplastic-like [Cucumis sativus]	gi|449469271|ref|XM_004152297.1|	260	6e-67	PREDICTED: Cucumis sativus palmitoyl-monogalactosyldiacylglycerol delta-7 desaturase, chloroplastic-like (LOC101209978), mRNA >gi|449515928|ref|XM_004164952.1| PREDICTED: Cucumis sativus palmitoyl-monogalactosyldiacylglycerol delta-7 desaturase, chloroplastic-like (LOC101225241), mRNA	sp|Q949X0|ADS3_ARATH	166	4e-42	Palmitoyl-monogalactosyldiacylglycerol delta-7 desaturase, chloroplastic OS=Arabidopsis thaliana GN=ADS3 PE=2 SV=2	sll0541	117	5e-27	COG1398	Fatty-acid desaturase	K00507	8e-44	172	vvi:100249077	stearoyl-CoA desaturase (delta-9 desaturase) [EC:1.14.19.1]	GO:0006655//phosphatidylglycerol biosynthetic process;GO:0019288//isopentenyl diphosphate biosynthetic process, mevalonate-independent pathway;GO:0015995//chlorophyll biosynthetic process;GO:0016117//carotenoid biosynthetic process;GO:0006636//unsaturated fatty acid biosynthetic process;GO:0010205//photoinhibition;GO:0002213//defense response to insect;GO:0001676//long-chain fatty acid metabolic …	GO:0004768//stearoyl-CoA 9-desaturase activity;GO:0009979//16:0 monogalactosyldiacylglycerol desaturase activity	GO:0016021//integral to membrane;GO:0009579//thylakoid;GO:0009507//chloroplast	--
Unigene17596_All	1563	12	480	0.3503	14.9755	5.41787	Up	4.00588e-132	7.22009e-130	gi|449467473|ref|XP_004151447.1|	644.4	0	PREDICTED: zinc finger CCCH domain-containing protein 15-like [Cucumis sativus] >gi|449521453|ref|XP_004167744.1| PREDICTED: zinc finger CCCH domain-containing protein 15-like [Cucumis sativus]	gi|449467472|ref|XM_004151399.1|	1237	0	PREDICTED: Cucumis sativus zinc finger CCCH domain-containing protein 15-like (LOC101203274), mRNA >gi|449521452|ref|XM_004167696.1| PREDICTED: Cucumis sativus zinc finger CCCH domain-containing protein 15-like (LOC101203274), mRNA	sp|Q9C9F5|C3H15_ARATH	278	5e-75	Zinc finger CCCH domain-containing protein 15 OS=Arabidopsis thaliana GN=At1g68200 PE=2 SV=1	SPBC1718.07c	82	3e-15	COG5063	CCCH-type Zn-finger protein	--	--	--	--	--	GO:0006355//regulation of transcription, DNA-dependent	GO:0005488//binding	-	--
Unigene8691_All	955	8	317	0.3823	16.1866	5.40395	Up	1.23946e-87	1.53714e-85	gi|449458809|ref|XP_004147139.1|	314.7	1e-84	PREDICTED: uncharacterized protein LOC101223057 [Cucumis sativus] >gi|449503516|ref|XP_004162041.1| PREDICTED: uncharacterized LOC101223057 [Cucumis sativus]	gi|449458808|ref|XM_004147091.1|	109	5e-21	PREDICTED: Cucumis sativus uncharacterized LOC101223057 (LOC101223057), mRNA >gi|449503515|ref|XM_004161993.1| PREDICTED: Cucumis sativus uncharacterized LOC101223057 (LOC101223057), mRNA	sp|P13983|EXTN_TOBAC	51.2	9e-07	Extensin OS=Nicotiana tabacum GN=HRGPNT3 PE=2 SV=1	--	--	--	--	--	--	--	--	--	--	-	-	-	--
Unigene13595_All	1811	46	1798	1.1591	48.4139	5.38434	Up	0	0	gi|449440323|ref|XP_004137934.1|	1053.1	0	PREDICTED: laccase-17-like [Cucumis sativus] >gi|449483665|ref|XP_004156653.1| PREDICTED: laccase-17-like [Cucumis sativus]	gi|449440322|ref|XM_004137886.1|	1328	0	PREDICTED: Cucumis sativus laccase-17-like (LOC101205176), mRNA >gi|449483664|ref|XM_004156605.1| PREDICTED: Cucumis sativus laccase-17-like (LOC101225512), mRNA	sp|Q9FJD5|LAC17_ARATH	839	0	Laccase-17 OS=Arabidopsis thaliana GN=LAC17 PE=2 SV=1	YMR058w	157	7e-38	COG2132	Putative multicopper oxidases	K00423	2e-70	265	ppp:PHYPADRAFT_163787	L-ascorbate oxidase [EC:1.10.3.3]	GO:0046274//lignin catabolic process;GO:0055114//oxidation-reduction process	GO:0005507//copper ion binding;GO:0052716//hydroquinone:oxygen oxidoreductase activity;GO:0008447//L-ascorbate oxidase activity	GO:0048046//apoplast	--
Unigene11935_All	410	2	76	0.2226	9.0392	5.34367	Up	8.30156e-22	2.78321e-20	--	--	--	--	--	--	--	--	--	--	--	--	--	--	--	--	--	--	--	--	--	--	-	-	-	--
Unigene5618_All	342	2	74	0.2669	10.5513	5.30498	Up	3.37578e-21	1.0959e-19	--	--	--	--	--	--	--	--	--	--	--	--	--	--	--	--	--	--	--	--	--	--	-	-	-	--
Unigene16194_All	301	1	36	0.1516	5.8322	5.2657	Up	8.40248e-11	1.43088e-09	gi|449511096|ref|XP_004163861.1|	157.9	4e-38	PREDICTED: laccase-4-like [Cucumis sativus]	gi|449511095|ref|XM_004163813.1|	230	6e-58	PREDICTED: Cucumis sativus laccase-4-like (LOC101219947), mRNA	sp|O80434|LAC4_ARATH	127	2e-30	Laccase-4 OS=Arabidopsis thaliana GN=IRX12 PE=2 SV=2	RSp0656	55.1	3e-08	COG2132	Putative multicopper oxidases	K00423	8e-12	66.6	bdi:100828749	L-ascorbate oxidase [EC:1.10.3.3]	GO:0009834//secondary cell wall biogenesis;GO:0046274//lignin catabolic process;GO:0055114//oxidation-reduction process	GO:0005507//copper ion binding;GO:0052716//hydroquinone:oxygen oxidoreductase activity;GO:0008447//L-ascorbate oxidase activity	GO:0048046//apoplast	--
CL2520.Contig2_All	735	3	108	0.1863	7.1653	5.26533	Up	2.5141e-30	1.15048e-28	gi|449449599|ref|XP_004142552.1|	344	1e-93	PREDICTED: germin-like protein subfamily 1 member 17-like [Cucumis sativus] >gi|449479697|ref|XP_004155680.1| PREDICTED: germin-like protein subfamily 1 member 17-like [Cucumis sativus]	gi|449449598|ref|XM_004142504.1|	153	3e-34	PREDICTED: Cucumis sativus germin-like protein subfamily 1 member 17-like (LOC101218696), mRNA >gi|449479696|ref|XM_004155632.1| PREDICTED: Cucumis sativus germin-like protein subfamily 1 member 17-like (LOC101218696), mRNA	sp|Q9FIC6|GL117_ARATH	291	3e-79	Germin-like protein subfamily 1 member 17 OS=Arabidopsis thaliana GN=At5g39150 PE=2 SV=1	--	--	--	--	--	--	--	--	--	--	GO:0009651//response to salt stress;GO:0055114//oxidation-reduction process	GO:0050162//oxalate oxidase activity;GO:0045735//nutrient reservoir activity;GO:0030145//manganese ion binding	GO:0048046//apoplast;GO:0005618//cell wall;GO:0031012//extracellular matrix	--
CL6268.Contig1_All	1821	3	108	0.0752	2.8921	5.26524	Up	2.5141e-30	1.15126e-28	gi|449469941|ref|XP_004152677.1|	680.2	0	PREDICTED: cytokinin dehydrogenase 5-like [Cucumis sativus]	gi|449469940|ref|XM_004152629.1|	436	1e-119	PREDICTED: Cucumis sativus cytokinin dehydrogenase 5-like (LOC101212272), mRNA	sp|Q67YU0|CKX5_ARATH	599	1e-171	Cytokinin dehydrogenase 5 OS=Arabidopsis thaliana GN=CKX5 PE=2 SV=1	all0324	129	2e-29	COG0277	FAD/FMN-containing dehydrogenases	K00279	0	666	pop:POPTR_754101	cytokinin dehydrogenase [EC:1.5.99.12]	GO:0009823//cytokinin catabolic process;GO:0009753//response to jasmonic acid stimulus;GO:0022900//electron transport chain;GO:0009694//jasmonic acid metabolic process;GO:0032940//secretion by cell	GO:0019139//cytokinin dehydrogenase activity;GO:0050660//flavin adenine dinucleotide binding;GO:0008762//UDP-N-acetylmuramate dehydrogenase activity	GO:0009536//plastid;GO:0016023//cytoplasmic membrane-bounded vesicle;GO:0005576//extracellular region	--
Unigene5234_All	566	1	35	0.0806	3.0154	5.22543	Up	1.6935e-10	2.80889e-09	gi|147864970|emb|CAN83623.1|	66.6	8e-65	hypothetical protein VITISV_010870 [Vitis vinifera]	gi|381388800|gb|AC235906.2|	67.9	1e-08	Glycine max clone GM_WBc0206C07, complete sequence	sp|P10978|POLX_TOBAC	90.5	2e-28	Retrovirus-related Pol polyprotein from transposon TNT 1-94 OS=Nicotiana tabacum PE=2 SV=1	--	--	--	--	--	K10760	3e-52	161	vvi:100247527	adenylate isopentenyltransferase (cytokinin synthase)	-	-	-	--
CL5952.Contig1_All	470	11	385	1.068	39.9449	5.22503	Up	1.69865e-104	2.50678e-102	gi|343466177|gb|AEM42982.1|	138.7	3e-32	cucurbitadienol synthase [Siraitia grosvenorii]	gi|343466176|gb|HQ128567.1|	749	0	Siraitia grosvenorii cucurbitadienol synthase mRNA, complete cds	sp|Q6BE24|CUCS_CUCPE	105	9e-24	Cucurbitadienol synthase OS=Cucurbita pepo GN=CPQ PE=1 SV=1	--	--	--	--	--	K01853	2e-12	69.3	gmx:548054	cycloartenol synthase [EC:5.4.99.8]	-	-	-	--
Unigene18182_All	636	30	1041	2.1525	79.8164	5.2126	Up	1.18625e-279	4.33392e-277	gi|449445188|ref|XP_004140355.1|	192.2	5e-48	PREDICTED: uncharacterized protein LOC101207237 [Cucumis sativus]	gi|449445187|ref|XM_004140307.1|	333	1e-88	PREDICTED: Cucumis sativus uncharacterized LOC101207237 (LOC101207237), mRNA	sp|F4I2H7|TPX2_ARATH	65.1	3e-11	Protein TPX2 OS=Arabidopsis thaliana GN=TPX2 PE=1 SV=1	--	--	--	--	--	--	--	--	--	--	GO:0007067//mitosis	-	GO:0005819//spindle;GO:0005634//nucleus;GO:0005874//microtubule	--
CL336.Contig7_All	1990	1	34	0.0229	0.8332	5.18524	Up	3.41086e-10	5.51259e-09	gi|449507512|ref|XP_004163053.1|	28.5	0	PREDICTED: LOW QUALITY PROTEIN: UDP-glucuronate:xylan alpha-glucuronosyltransferase 1-like [Cucumis sativus]	gi|449507511|ref|XM_004163005.1|	1312	0	PREDICTED: Cucumis sativus UDP-glucuronate:xylan alpha-glucuronosyltransferase 1-like (LOC101222026), mRNA	sp|Q9LSB1|GUX1_ARATH	427	4e-133	UDP-glucuronate:xylan alpha-glucuronosyltransferase 1 OS=Arabidopsis thaliana GN=GUX1 PE=2 SV=1	--	--	--	--	--	K00750	7e-135	442	rcu:RCOM_0138290	glycogenin glucosyltransferase [EC:2.4.1.186]	GO:0005982//starch metabolic process;GO:0010417//glucuronoxylan biosynthetic process	GO:0080116//glucuronoxylan glucuronosyltransferase activity;GO:0008466//glycogenin glucosyltransferase activity	GO:0005794//Golgi apparatus	--
Unigene28651_All	317	1	34	0.144	5.2302	5.18273	Up	3.41086e-10	5.51127e-09	--	--	--	--	--	--	--	--	--	--	--	--	--	--	--	--	--	--	--	--	--	--	-	-	-	--
Unigene31449_All	335	4	133	0.5449	19.36	5.15094	Up	1.05932e-36	5.86392e-35	--	--	--	--	--	--	--	--	--	--	--	--	--	--	--	--	--	--	--	--	--	--	-	-	-	--
CL5443.Contig3_All	1684	9	299	0.2439	8.6582	5.14971	Up	6.71058e-81	7.67447e-79	gi|449439061|ref|XP_004137306.1|	817.8	0	PREDICTED: uncharacterized protein LOC101210661 [Cucumis sativus] >gi|449483306|ref|XP_004156551.1| PREDICTED: uncharacterized LOC101210661 [Cucumis sativus]	gi|449439060|ref|XM_004137258.1|	1380	0	PREDICTED: Cucumis sativus uncharacterized LOC101210661 (LOC101210661), mRNA	--	--	--	--	--	--	--	--	--	--	--	--	--	--	-	-	-	--
CL2277.Contig2_All	1210	5	163	0.1886	6.569	5.12227	Up	1.38728e-44	9.06818e-43	gi|449531468|ref|XP_004172708.1|	155.2	8e-107	PREDICTED: probable WRKY transcription factor 53-like [Cucumis sativus]	gi|449531467|ref|XM_004172660.1|	172	6e-40	PREDICTED: Cucumis sativus probable WRKY transcription factor 53-like (LOC101231130), mRNA	sp|Q9SUP6|WRK53_ARATH	96.3	1e-42	Probable WRKY transcription factor 53 OS=Arabidopsis thaliana GN=WRKY53 PE=1 SV=1	--	--	--	--	--	K13425	3e-10	45.8	pop:POPTR_755334	WRKY transcription factor 22	-	-	-	--
Unigene30800_All	671	21	683	1.4282	49.636	5.11912	Up	2.17948e-182	5.22372e-180	gi|449441125|ref|XP_004138334.1|	193	3e-48	PREDICTED: COBRA-like protein 4-like, partial [Cucumis sativus] >gi|449529461|ref|XP_004171718.1| PREDICTED: COBRA-like protein 4-like, partial [Cucumis sativus]	gi|449529460|ref|XM_004171670.1|	367	1e-98	PREDICTED: Cucumis sativus COBRA-like protein 4-like (LOC101221756), partial mRNA	sp|Q10JL1|COBL5_ORYSJ	160	6e-40	COBRA-like protein 5 OS=Oryza sativa subsp. japonica GN=BC1 PE=2 SV=1	--	--	--	--	--	--	--	--	--	--	GO:0009834//secondary cell wall biogenesis;GO:0009808//lignin metabolic process;GO:0009830//cell wall modification involved in abscission	-	GO:0009531//secondary cell wall	--
Unigene39498_All	203	2	65	0.4496	15.6141	5.11806	Up	1.82893e-18	5.17436e-17	--	--	--	--	--	--	--	--	--	--	--	--	--	--	--	--	--	--	--	--	--	--	-	-	-	--
Unigene32361_All	454	2	64	0.201	6.8742	5.09592	Up	3.67362e-18	1.0239e-16	gi|449484368|ref|XP_004156863.1|	89.7	1e-17	PREDICTED: uncharacterized protein LOC101232593 [Cucumis sativus]	--	--	--	--	--	--	--	--	--	--	--	--	--	--	--	--	--	--	-	-	-	--
Unigene2953_All	351	1	32	0.13	4.4457	5.09583	Up	1.38052e-09	2.10153e-08	--	--	--	--	--	--	--	--	--	--	--	--	--	--	--	--	--	--	--	--	--	--	-	-	-	--
Unigene39476_All	494	1	32	0.0924	3.1588	5.09534	Up	1.38052e-09	2.10201e-08	gi|449501660|ref|XP_004161429.1|	60.1	1e-08	PREDICTED: uncharacterized LOC101207232 [Cucumis sativus]	gi|449501659|ref|XM_004161381.1|	115	4e-23	PREDICTED: Cucumis sativus uncharacterized LOC101207232 (LOC101207232), mRNA	sp|Q9T0K5|LRX3_ARATH	98.6	1e-23	Leucine-rich repeat extensin-like protein 3 OS=Arabidopsis thaliana GN=LRX3 PE=1 SV=1	Rv3876	78.2	6e-15	COG0455	ATPases involved in chromosome partitioning	K15174	7e-21	97.8	sbi:SORBI_07g003820	RNA polymerase II-associated factor 1	-	GO:0005515//protein binding	GO:0009506//plasmodesma;GO:0009505//plant-type cell wall	--
Unigene6165_All	377	2	63	0.2421	8.1489	5.07293	Up	7.37566e-18	2.0273e-16	--	--	--	--	--	--	--	--	--	--	--	--	--	--	--	--	--	--	--	--	--	--	-	-	-	--
Unigene2113_All	318	2	62	0.287	9.5074	5.04993	Up	1.48017e-17	4.00493e-16	gi|147864521|emb|CAN80490.1|	55.8	2e-07	hypothetical protein VITISV_004703 [Vitis vinifera]	--	--	--	--	--	--	--	--	--	--	--	--	--	--	--	--	--	--	-	-	-	--
CL5741.Contig3_All	1475	3	92	0.0928	3.0415	5.03451	Up	1.77965e-25	6.95286e-24	gi|449456500|ref|XP_004145987.1|	466.1	7e-130	PREDICTED: uncharacterized protein LOC101217049 [Cucumis sativus]	gi|449456499|ref|XM_004145939.1|	260	4e-66	PREDICTED: Cucumis sativus uncharacterized LOC101217049 (LOC101217049), mRNA	sp|Q9SF32|IQD1_ARATH	104	2e-22	Protein IQ-DOMAIN 1 OS=Arabidopsis thaliana GN=IQD1 PE=1 SV=1	--	--	--	--	--	--	--	--	--	--	-	-	-	--
Unigene9536_All	790	2	61	0.1155	3.7653	5.0268	Up	2.96906e-17	7.91308e-16	gi|219567000|dbj|BAH05018.1|	285.8	5e-76	galactose-binding type-2 ribosome-inactivating protein [Momordica charantia]	gi|449499484|ref|XM_004160782.1|	135	8e-29	PREDICTED: Cucumis sativus nigrin b-like (LOC101206283), mRNA	sp|P33183|NIGB_SAMNI	216	1e-56	Nigrin b OS=Sambucus nigra PE=1 SV=2	--	--	--	--	--	--	--	--	--	--	-	-	-	--
CL8906.Contig3_All	360	1	30	0.1268	4.0637	5.00217	Up	5.56928e-09	7.87988e-08	gi|326492680|dbj|BAJ90196.1|	211.5	3e-54	predicted protein [Hordeum vulgare subsp. vulgare]	gi|270135264|gb|BT102216.1|	513	1e-143	Picea glauca clone GQ0168_M05 mRNA sequence	sp|P50256|EF1AC_PORPU	208	5e-55	Elongation factor 1-alpha C OS=Porphyra purpurea GN=TEF-C PE=2 SV=1	SPCC794.09c	216	8e-57	COG5256	Translation elongation factor EF-1alpha (GTPase)	K03231	7e-51	196	cme:CMH226C	elongation factor 1-alpha	GO:0006414//translational elongation;GO:0006184//GTP catabolic process	GO:0003746//translation elongation factor activity;GO:0003924//GTPase activity;GO:0005525//GTP binding	GO:0005737//cytoplasm	--
CL7315.Contig1_All	1309	6	175	0.2092	6.5192	4.96174	Up	5.02662e-47	3.49172e-45	gi|255586913|ref|XP_002534059.1|	344.4	2e-93	60S ribosomal protein L34, putative [Ricinus communis] >gi|223525913|gb|EEF28325.1| 60S ribosomal protein L34, putative [Ricinus communis]	gi|449488192|ref|XM_004157916.1|	60	6e-06	PREDICTED: Cucumis sativus uncharacterized LOC101214479 (LOC101214479), mRNA	--	--	--	--	--	--	--	--	--	--	--	--	--	--	-	-	-	--
CL8535.Contig2_All	968	1	29	0.0471	1.4609	4.95499	Up	1.11709e-08	1.52778e-07	gi|449441572|ref|XP_004138556.1|	176	2e-107	PREDICTED: BTB/POZ domain-containing protein At3g56230-like [Cucumis sativus] >gi|449499220|ref|XP_004160755.1| PREDICTED: BTB/POZ domain-containing protein At3g56230-like [Cucumis sativus]	gi|449499219|ref|XM_004160707.1|	121	1e-24	PREDICTED: Cucumis sativus BTB/POZ domain-containing protein At3g56230-like (LOC101223408), mRNA	sp|Q9LYL9|Y3623_ARATH	165	7e-69	BTB/POZ domain-containing protein At3g56230 OS=Arabidopsis thaliana GN=At3g56230 PE=2 SV=1	--	--	--	--	--	K10523	6e-08	56.6	olu:OSTLU_4529	speckle-type POZ protein	GO:0045492//xylan biosynthetic process;GO:0010413//glucuronoxylan metabolic process	-	GO:0005634//nucleus	--
Unigene25471_All	278	1	29	0.1641	5.0869	4.95414	Up	1.11709e-08	1.52809e-07	--	--	--	--	--	--	--	--	--	--	--	--	--	--	--	--	--	--	--	--	--	--	-	-	-	--
CL8906.Contig2_All	226	1	29	0.2019	6.2573	4.95383	Up	1.11709e-08	1.5284e-07	gi|326492680|dbj|BAJ90196.1|	129	2e-29	predicted protein [Hordeum vulgare subsp. vulgare]	gi|32993518|dbj|AK108309.1|	343	5e-92	Oryza sativa Japonica Group cDNA clone:002-141-F09, full insert sequence	sp|Q03033|EF1A_WHEAT	94.7	1e-20	Elongation factor 1-alpha OS=Triticum aestivum GN=TEF1 PE=2 SV=1	YPR080w	132	1e-31	COG5256	Translation elongation factor EF-1alpha (GTPase)	K03231	1e-20	95.9	mtr:MTR_6g021800	elongation factor 1-alpha	-	GO:0097159//organic cyclic compound binding;GO:0016740//transferase activity;GO:1901363	-	--
CL1669.Contig5_All	2097	1	29	0.0218	0.6744	4.9512	Up	1.11709e-08	1.5287e-07	gi|449447914|ref|XP_004141711.1|	995	0	PREDICTED: uncharacterized protein LOC101206287 [Cucumis sativus] >gi|449480498|ref|XP_004155911.1| PREDICTED: uncharacterized LOC101206287 [Cucumis sativus]	gi|449447913|ref|XM_004141663.1|	1980	0	PREDICTED: Cucumis sativus uncharacterized LOC101206287 (LOC101206287), mRNA >gi|449480497|ref|XM_004155863.1| PREDICTED: Cucumis sativus uncharacterized LOC101206287 (LOC101206287), mRNA	--	--	--	--	alr4412	119	3e-26	COG2304	Uncharacterized protein containing a von Willebrand factor type A (vWA) domain	--	--	--	--	--	GO:0009690//cytokinin metabolic process	-	GO:0005576//extracellular region;GO:0005886//plasma membrane	--
CL3293.Contig2_All	820	5	144	0.2783	8.5634	4.94347	Up	7.57524e-39	4.41382e-37	gi|449462113|ref|XP_004148786.1|	467.2	1e-130	PREDICTED: laccase-17-like [Cucumis sativus] >gi|449517601|ref|XP_004165834.1| PREDICTED: laccase-17-like [Cucumis sativus]	gi|449517600|ref|XM_004165786.1|	198	6e-48	PREDICTED: Cucumis sativus laccase-17-like (LOC101230661), mRNA	sp|Q9FJD5|LAC17_ARATH	429	7e-121	Laccase-17 OS=Arabidopsis thaliana GN=LAC17 PE=2 SV=1	YFL041w	57.8	2e-08	COG2132	Putative multicopper oxidases	K00423	8e-13	72.4	ppp:PHYPADRAFT_163787	L-ascorbate oxidase [EC:1.10.3.3]	GO:0046274//lignin catabolic process;GO:0055114//oxidation-reduction process	GO:0005507//copper ion binding;GO:0052716//hydroquinone:oxygen oxidoreductase activity;GO:0008447//L-ascorbate oxidase activity	GO:0048046//apoplast	--
CL1135.Contig6_All	1891	71	1997	1.7133	51.4974	4.90965	Up	0	0	gi|449524018|ref|XP_004169020.1|	778.1	0	PREDICTED: LOW QUALITY PROTEIN: secologanin synthase-like [Cucumis sativus]	gi|449456535|ref|XM_004145957.1|	547	1e-152	PREDICTED: Cucumis sativus secologanin synthase-like (LOC101222418), mRNA	sp|Q05047|C72A1_CATRO	596	2e-170	Secologanin synthase OS=Catharanthus roseus GN=CYP72A1 PE=2 SV=1	AGc2890	156	1e-37	COG2124	Cytochrome P450	K15638	8e-128	456	ath:AT1G17060	cytochrome P450, family 72, subfamily C, polypeptide 1	-	GO:0046872//metal ion binding;GO:0016491//oxidoreductase activity	-	--
CL5757.Contig1_All	269	1	28	0.1696	5.0758	4.90343	Up	2.23846e-08	2.94463e-07	--	--	--	--	--	--	--	--	--	--	--	--	--	--	--	--	--	--	--	--	--	--	-	-	-	--
CL6513.Contig1_All	363	1	28	0.1257	3.7614	4.90321	Up	2.23846e-08	2.94578e-07	gi|449444508|ref|XP_004140016.1|	227.6	4e-59	PREDICTED: myb-related protein Zm1-like [Cucumis sativus] >gi|449516209|ref|XP_004165140.1| PREDICTED: myb-related protein Zm1-like [Cucumis sativus]	gi|449444507|ref|XM_004139968.1|	383	1e-104	PREDICTED: Cucumis sativus myb-related protein Zm1-like (LOC101202999), mRNA >gi|449516208|ref|XM_004165092.1| PREDICTED: Cucumis sativus myb-related protein Zm1-like (LOC101202999), mRNA	sp|P20024|MYB1_MAIZE	186	4e-48	Myb-related protein Zm1 OS=Zea mays PE=2 SV=1	ECU11g1690	95.5	2e-20	COG5147	Myb superfamily proteins, including transcription factors and mRNA splicing factors	K09422	2e-55	211	rcu:RCOM_1574830	myb proto-oncogene protein, plant	GO:0009866//induced systemic resistance, ethylene mediated signaling pathway;GO:0071732//cellular response to nitric oxide;GO:0045492//xylan biosynthetic process;GO:0009809//lignin biosynthetic process;GO:0009753//response to jasmonic acid stimulus;GO:0009751//response to salicylic acid stimulus;GO:0010413//glucuronoxylan metabolic process;GO:2000652//regulation of secondary cell wall biogenesis;…	GO:0003677//DNA binding;GO:0003700//sequence-specific DNA binding transcription factor activity;GO:0003682//chromatin binding	GO:0005634//nucleus	--
Unigene31269_All	266	1	28	0.1716	5.133	4.90268	Up	2.23846e-08	2.94521e-07	--	--	--	--	gi|297819143|ref|XM_002877409.1|	58	5e-06	Arabidopsis lyrata subsp. lyrata predicted protein, mRNA	--	--	--	--	--	--	--	--	--	--	--	--	--	--	-	-	-	--
Unigene10557_All	1345	157	4286	5.3267	155.392	4.86653	Up	0	0	gi|449448498|ref|XP_004142003.1|	569.3	5e-161	PREDICTED: uncharacterized protein LOC101217122 [Cucumis sativus] >gi|449525798|ref|XP_004169903.1| PREDICTED: uncharacterized LOC101217122 [Cucumis sativus]	gi|449448497|ref|XM_004141955.1|	517	1e-144	PREDICTED: Cucumis sativus uncharacterized LOC101217122 (LOC101217122), mRNA >gi|449525797|ref|XM_004169855.1| PREDICTED: Cucumis sativus uncharacterized LOC101217122 (LOC101217122), mRNA	sp|Q9FH92|IX15L_ARATH	440	1e-123	Protein IRX15-LIKE OS=Arabidopsis thaliana GN=IRX15-L PE=2 SV=1	Rv3876	60.1	9e-09	COG0455	ATPases involved in chromosome partitioning	K14709	2e-09	62	vcn:VOLCADRAFT_104214	solute carrier family 39 (zinc transporter), member 1/2/3	GO:0045492//xylan biosynthetic process;GO:0009834//secondary cell wall biogenesis;GO:0010413//glucuronoxylan metabolic process	-	GO:0005794//Golgi apparatus	--
CL9029.Contig1_All	1694	60	1635	1.6163	47.0655	4.8639	Up	0	0	gi|255544572|ref|XP_002513347.1|	549.3	7e-155	(S)-N-methylcoclaurine 3&apos;-hydroxylase isozyme, putative [Ricinus communis] >gi|223547255|gb|EEF48750.1| (S)-N-methylcoclaurine 3&apos;-hydroxylase isozyme, putative [Ricinus communis]	gi|449451917|ref|XM_004143659.1|	182	8e-43	PREDICTED: Cucumis sativus cytochrome P450 76C2-like (LOC101208474), mRNA	sp|Q9FXW4|C80B2_COPJA	448	4e-126	Probable (S)-N-methylcoclaurine 3'-hydroxylase isozyme 2 OS=Coptis japonica GN=CYP80B2 PE=2 SV=1	BH0579	122	2e-27	COG2124	Cytochrome P450	K00517	5e-94	343	ath:AT3G52970	[EC:1.14.-.-]	-	GO:0046872//metal ion binding;GO:0016705//oxidoreductase activity, acting on paired donors, with incorporation or reduction of molecular oxygen;GO:0004497//monooxygenase activity	-	--
CL5086.Contig6_All	4722	55	1494	0.5315	15.4285	4.85938	Up	0	0	gi|343466177|gb|AEM42982.1|	1463.4	0	cucurbitadienol synthase [Siraitia grosvenorii]	gi|343466176|gb|HQ128567.1|	4668	0	Siraitia grosvenorii cucurbitadienol synthase mRNA, complete cds	sp|Q6BE24|CUCS_CUCPE	1340	0	Cucurbitadienol synthase OS=Cucurbita pepo GN=CPQ PE=1 SV=1	YHR072w	478	3e-134	COG1657	Squalene cyclase	K01853	0	1133	vvi:100243389	cycloartenol synthase [EC:5.4.99.8]	GO:0008152//metabolic process	GO:0016866//intramolecular transferase activity	-	--
CL367.Contig4_All	463	1	27	0.0986	2.8437	4.85004	Up	4.48082e-08	5.65343e-07	gi|449454368|ref|XP_004144927.1|	146.7	1e-34	PREDICTED: (RS)-norcoclaurine 6-O-methyltransferase-like [Cucumis sativus] >gi|449474662|ref|XP_004154248.1| PREDICTED: (RS)-norcoclaurine 6-O-methyltransferase-like [Cucumis sativus] >gi|449519782|ref|XP_004166913.1| PREDICTED: (RS)-norcoclaurine 6-O-methyltransferase-like [Cucumis sativus]	gi|449526578|ref|XM_004170243.1|	97.6	1e-17	PREDICTED: Cucumis sativus (RS)-norcoclaurine 6-O-methyltransferase-like (LOC101211054), mRNA	sp|Q9LEL6|6OMT_COPJA	99.4	8e-22	(RS)-norcoclaurine 6-O-methyltransferase OS=Coptis japonica PE=1 SV=1	--	--	--	--	--	K16040	3e-16	82.4	vvi:100233030	trans-resveratrol di-O-methyltransferase [EC:2.1.1.240]	GO:0032259//methylation	GO:0008171//O-methyltransferase activity;GO:0046983//protein dimerization activity	-	--
Unigene28474_All	682	4	106	0.2676	7.5791	4.82388	Up	1.47402e-28	6.43587e-27	gi|449454764|ref|XP_004145124.1|	412.9	2e-114	PREDICTED: monoglyceride lipase-like [Cucumis sativus] >gi|449472068|ref|XP_004153486.1| PREDICTED: monoglyceride lipase-like [Cucumis sativus] >gi|449503363|ref|XP_004161965.1| PREDICTED: monoglyceride lipase-like [Cucumis sativus]	gi|449503362|ref|XM_004161917.1|	656	0	PREDICTED: Cucumis sativus monoglyceride lipase-like (LOC101224250), mRNA	--	--	--	--	Rv0183	87.4	2e-17	COG2267	Lysophospholipase	--	--	--	--	--	GO:0000041//transition metal ion transport	GO:0016787//hydrolase activity	GO:0005737//cytoplasm;GO:0005634//nucleus	--
Unigene15256_All	229	2	53	0.3985	11.286	4.82381	Up	7.63752e-15	1.76423e-13	--	--	--	--	gi|449521572|ref|XM_004167756.1|	60	1e-06	PREDICTED: Cucumis sativus anthocyanidin 3-O-glucosyltransferase 2-like (LOC101228375), mRNA	--	--	--	--	--	--	--	--	--	--	--	--	--	--	-	-	-	--
Unigene18855_All	777	5	131	0.2936	8.2215	4.80748	Up	6.09464e-35	3.2007e-33	gi|449501325|ref|XP_004161338.1|	384.4	1e-105	PREDICTED: uncharacterized protein LOC101228706 [Cucumis sativus]	gi|449501324|ref|XM_004161290.1|	553	1e-155	PREDICTED: Cucumis sativus uncharacterized LOC101228706 (LOC101228706), mRNA	--	--	--	--	--	--	--	--	--	--	--	--	--	--	-	GO:0008375//acetylglucosaminyltransferase activity	GO:0016020//membrane;GO:0005739//mitochondrion	--
Unigene4973_All	877	23	599	1.1968	33.3063	4.79854	Up	9.86384e-155	2.0388e-152	gi|449457608|ref|XP_004146540.1|	322	7e-87	PREDICTED: disease resistance response protein 206-like [Cucumis sativus]	gi|449457607|ref|XM_004146492.1|	323	2e-85	PREDICTED: Cucumis sativus disease resistance response protein 206-like (LOC101214654), mRNA	sp|P13240|DR206_PEA	261	4e-70	Disease resistance response protein 206 OS=Pisum sativum GN=PI206 PE=2 SV=2	--	--	--	--	--	--	--	--	--	--	-	-	-	--
Unigene39843_All	636	2	52	0.1435	3.987	4.79618	Up	1.52444e-14	3.45293e-13	gi|449476156|ref|XP_004154656.1|	234.6	9e-61	PREDICTED: heat stress transcription factor B-4b-like [Cucumis sativus]	gi|449476155|ref|XM_004154608.1|	228	6e-57	PREDICTED: Cucumis sativus heat stress transcription factor B-4b-like (LOC101228006), mRNA	sp|Q7XHZ0|HFB4B_ORYSJ	166	1e-41	Heat stress transcription factor B-4b OS=Oryza sativa subsp. japonica GN=HSFB4B PE=2 SV=1	YGL073w	52.4	6e-07	COG5169	Heat shock transcription factor	--	--	--	--	--	-	-	-	--
CL1465.Contig2_All	1547	1	26	0.0295	0.8196	4.79613	Up	8.95944e-08	1.08835e-06	gi|449452534|ref|XP_004144014.1|	670.6	0	PREDICTED: mitogen-activated protein kinase kinase 2-like [Cucumis sativus]	gi|449452533|ref|XM_004143966.1|	1548	0	PREDICTED: Cucumis sativus mitogen-activated protein kinase kinase 2-like (LOC101204545), mRNA	sp|Q9S7U9|M2K2_ARATH	521	3e-148	Mitogen-activated protein kinase kinase 2 OS=Arabidopsis thaliana GN=MKK2 PE=1 SV=2	YAR019c	120	5e-27	COG0515	Serine/threonine protein kinase	K04368	1e-146	518	rcu:RCOM_1046440	mitogen-activated protein kinase kinase 1 [EC:2.7.12.2]	GO:0006833//water transport;GO:0009414//response to water deprivation;GO:0009697//salicylic acid biosynthetic process;GO:0009631//cold acclimation;GO:0009738//abscisic acid mediated signaling pathway;GO:0048481//ovule development;GO:0010363//regulation of plant-type hypersensitive response;GO:0010200//response to chitin;GO:0042542//response to hydrogen peroxide;GO:0031348//negative regulation of …	GO:0004713//protein tyrosine kinase activity;GO:0004674//protein serine/threonine kinase activity;GO:0004708//MAP kinase kinase activity;GO:0005515//protein binding;GO:0005524//ATP binding	GO:0005886//plasma membrane;GO:0005737//cytoplasm	--
CL3216.Contig2_All	328	8	203	1.113	30.1801	4.76107	Up	3.72298e-53	2.88569e-51	gi|462403125|gb|EMJ08682.1|	165.6	2e-40	hypothetical protein PRUPE_ppa011828mg [Prunus persica]	gi|449448805|ref|XM_004142108.1|	151	5e-34	PREDICTED: Cucumis sativus uncharacterized LOC101214557 (LOC101214557), mRNA >gi|449503450|ref|XM_004161961.1| PREDICTED: Cucumis sativus uncharacterized LOC101214557 (LOC101214557), mRNA	sp|P13240|DR206_PEA	49.3	5e-07	Disease resistance response protein 206 OS=Pisum sativum GN=PI206 PE=2 SV=2	--	--	--	--	--	--	--	--	--	--	-	-	-	--
Unigene4151_All	868	2	50	0.1051	2.809	4.74022	Up	6.06134e-14	1.31688e-12	gi|449440155|ref|XP_004137850.1|	434.1	1e-120	PREDICTED: thaumatin-like protein 1-like [Cucumis sativus] >gi|449501022|ref|XP_004161257.1| PREDICTED: thaumatin-like protein 1-like [Cucumis sativus]	gi|449440154|ref|XM_004137802.1|	224	1e-55	PREDICTED: Cucumis sativus thaumatin-like protein 1-like (LOC101203304), mRNA >gi|449501021|ref|XM_004161209.1| PREDICTED: Cucumis sativus thaumatin-like protein 1-like (LOC101227966), mRNA	sp|Q9FSG7|TP1A_MALDO	317	4e-87	Thaumatin-like protein 1a OS=Malus domestica GN=TL1 PE=1 SV=1	--	--	--	--	--	--	--	--	--	--	-	-	-	--
Unigene6223_All	394	1	25	0.1158	3.0942	4.73986	Up	1.78931e-07	2.08513e-06	gi|449479095|ref|XP_004155503.1|	209.9	9e-54	PREDICTED: probable LRR receptor-like serine/threonine-protein kinase At4g08850-like [Cucumis sativus]	gi|449479094|ref|XM_004155455.1|	402	1e-109	PREDICTED: Cucumis sativus probable LRR receptor-like serine/threonine-protein kinase At4g08850-like (LOC101203457), mRNA	sp|Q8VZG8|Y4885_ARATH	99.4	6e-22	Probable LRR receptor-like serine/threonine-protein kinase At4g08850 OS=Arabidopsis thaliana GN=At4g08850 PE=1 SV=3	--	--	--	--	--	K13415	3e-13	71.6	rcu:RCOM_0478150	protein brassinosteroid insensitive 1 [EC:2.7.10.1 2.7.11.1]	GO:0016310//phosphorylation	GO:0016829//lyase activity;GO:0004672//protein kinase activity;GO:0046872//metal ion binding;GO:0000166//nucleotide binding	GO:0016020//membrane	--
Unigene15873_All	246	1	25	0.1855	4.9557	4.7396	Up	1.78931e-07	2.08477e-06	gi|356575799|ref|XP_003556024.1|	75.1	3e-13	PREDICTED: gibberellin 2-beta-dioxygenase 8-like [Glycine max]	gi|255555000|ref|XM_002518492.1|	61.9	3e-07	Ricinus communis gibberellin 20-oxidase, putative, mRNA	sp|O49561|G2OX8_ARATH	63.9	2e-11	Gibberellin 2-beta-dioxygenase 8 OS=Arabidopsis thaliana GN=GA2OX7 PE=1 SV=2	--	--	--	--	--	K05282	2e-06	48.9	aly:ARALYDRAFT_492287	gibberellin 20-oxidase [EC:1.14.11.12]	GO:0055114//oxidation-reduction process	GO:0016707//gibberellin 3-beta-dioxygenase activity;GO:0016702//oxidoreductase activity, acting on single donors with incorporation of molecular oxygen, incorporation of two atoms of oxygen	-	--
Unigene39428_All	318	1	25	0.1435	3.8336	4.73958	Up	1.78931e-07	2.08441e-06	--	--	--	--	--	--	--	--	--	--	--	--	--	--	--	--	--	--	--	--	--	--	-	-	-	--
Unigene32436_All	406	1	25	0.1124	3.0027	4.73955	Up	1.78931e-07	2.08405e-06	gi|359372828|gb|AEV42261.1|	23.5	7e-07	hypothetical protein [Beta vulgaris]	--	--	--	--	--	--	--	--	--	--	--	--	--	--	--	--	--	--	-	-	-	--
CL8680.Contig1_All	281	1	25	0.1624	4.3384	4.73954	Up	1.78931e-07	2.08369e-06	gi|359491943|ref|XP_003634343.1|	137.5	6e-32	PREDICTED: LOW QUALITY PROTEIN: ornithine decarboxylase [Vitis vinifera]	--	--	--	--	sp|Q8S3N2|DCOR_CAPAN	124	2e-29	Ornithine decarboxylase OS=Capsicum annuum GN=ODC PE=2 SV=1	SPAC144.04c	62	3e-10	COG0019	Diaminopimelate decarboxylase	K01581	4e-33	137	vvi:100232922	ornithine decarboxylase [EC:4.1.1.17]	-	GO:0016829//lyase activity	-	--
CL5569.Contig2_All	1031	1	25	0.0443	1.1824	4.73827	Up	1.78931e-07	2.08549e-06	gi|449495132|ref|XP_004159743.1|	555.8	4e-157	PREDICTED: uncharacterized transporter YBR287W-like [Cucumis sativus]	gi|449495131|ref|XM_004159695.1|	377	1e-101	PREDICTED: Cucumis sativus uncharacterized LOC101231888 (LOC101231888), mRNA	--	--	--	--	YBR287w	61.6	2e-09	COG0679	Predicted permeases	K07088	5e-131	465	rcu:RCOM_0875040		GO:0046482//para-aminobenzoic acid metabolic process;GO:0009926//auxin polar transport;GO:0055085//transmembrane transport	GO:0009672//auxin:hydrogen symporter activity	GO:0016021//integral to membrane;GO:0009507//chloroplast	--
Unigene21164_All	462	7	174	0.6914	18.3656	4.73134	Up	1.35821e-45	9.06221e-44	gi|225429476|ref|XP_002277676.1|	82.8	2e-15	PREDICTED: transcription factor MYB1R1 [Vitis vinifera] >gi|296081626|emb|CBI20631.3| unnamed protein product [Vitis vinifera]	gi|449450577|ref|XM_004142991.1|	71.9	6e-10	PREDICTED: Cucumis sativus uncharacterized LOC101204468 (LOC101204468), mRNA	--	--	--	--	--	--	--	--	--	--	--	--	--	--	GO:0006355//regulation of transcription, DNA-dependent	GO:0003676//nucleic acid binding	-	--
CL7020.Contig3_All	216	55	1348	11.6195	304.323	4.71098	Up	0	0	gi|449484076|ref|XP_004156777.1|	106.3	1e-22	PREDICTED: S-norcoclaurine synthase-like [Cucumis sativus]	--	--	--	--	sp|Q67A25|NCS_THLFG	50.4	2e-07	S-norcoclaurine synthase OS=Thalictrum flavum subsp. glaucum PE=1 SV=1	--	--	--	--	--	--	--	--	--	--	-	-	-	--
Unigene15041_All	732	4	98	0.2494	6.5285	4.71022	Up	3.6589e-26	1.46419e-24	gi|462403436|gb|EMJ08993.1|	244.6	1e-63	hypothetical protein PRUPE_ppa025571mg [Prunus persica]	gi|470138257|ref|XR_185091.1|	65.9	6e-08	PREDICTED: Fragaria vesca subsp. vesca kinesin-4-like (LOC101304022), misc_RNA	sp|O81635|ATK4_ARATH	98.6	3e-21	Kinesin-4 OS=Arabidopsis thaliana GN=ATK4 PE=1 SV=2	--	--	--	--	--	--	--	--	--	--	GO:0009987//cellular process	GO:0017111//nucleoside-triphosphatase activity;GO:0000166//nucleotide binding	GO:0043234//protein complex;GO:0015630//microtubule cytoskeleton;GO:0044430//cytoskeletal part	--
CL760.Contig2_All	925	16	389	0.7893	20.5072	4.69941	Up	7.92978e-100	1.12362e-97	gi|449503856|ref|XP_004162209.1|	275.4	9e-73	PREDICTED: chitinase-like protein 2-like [Cucumis sativus]	gi|449503855|ref|XM_004162161.1|	583	1e-163	PREDICTED: Cucumis sativus chitinase-like protein 2-like (LOC101225773), mRNA	sp|Q9LSP9|CTL2_ARATH	239	2e-63	Chitinase-like protein 2 OS=Arabidopsis thaliana GN=CTL2 PE=2 SV=1	STM0233	55.5	1e-07	COG3979	Uncharacterized protein contain chitin-binding domain type 3	K01183	4e-28	123	mtr:MTR_3g118390	chitinase [EC:3.2.1.14]	GO:0005975//carbohydrate metabolic process;GO:0006032//chitin catabolic process;GO:0016998//cell wall macromolecule catabolic process	GO:0004568//chitinase activity	-	--
CL1775.Contig2_All	1185	13	315	0.5006	12.9626	4.69455	Up	4.56348e-81	5.23669e-79	gi|449520309|ref|XP_004167176.1|	602.1	6e-171	PREDICTED: sugar transport protein 13-like [Cucumis sativus]	gi|449520308|ref|XM_004167128.1|	442	1e-121	PREDICTED: Cucumis sativus sugar transport protein 13-like (LOC101230074), mRNA	sp|Q94AZ2|STP13_ARATH	546	9e-156	Sugar transport protein 13 OS=Arabidopsis thaliana GN=STP13 PE=1 SV=2	sll0771	141	3e-33	COG0477	Permeases of the major facilitator superfamily	K08150	5e-34	143	vvi:100268023	MFS transporter, SP family, solute carrier family 2 (myo-inositol transporter), member 13	GO:0055085//transmembrane transport;GO:0015749//monosaccharide transport;GO:0055114//oxidation-reduction process;GO:0009414//response to water deprivation;GO:0009651//response to salt stress;GO:0043090//amino acid import;GO:0009737//response to abscisic acid stimulus	GO:0005358//high-affinity hydrogen:glucose symporter activity;GO:0032440//2-alkenal reductase [NAD(P)] activity	GO:0016021//integral to membrane;GO:0009506//plasmodesma;GO:0005737//cytoplasm;GO:0005886//plasma membrane	--
CL248.Contig1_All	1404	15	362	0.4875	12.573	4.68878	Up	7.03822e-93	9.23701e-91	gi|470125377|ref|XP_004298679.1|	381.3	2e-104	PREDICTED: protein ODORANT1-like isoform 1 [Fragaria vesca subsp. vesca] >gi|470125379|ref|XP_004298680.1| PREDICTED: protein ODORANT1-like isoform 2 [Fragaria vesca subsp. vesca]	gi|359497476|ref|XM_002264114.2|	355	8e-95	PREDICTED: Vitis vinifera protein ODORANT1-like (LOC100259031), mRNA	sp|Q50EX6|ODO1_PETHY	320	2e-87	Protein ODORANT1 OS=Petunia hybrida GN=ODO1 PE=2 SV=1	ECU11g1690	105	1e-22	COG5147	Myb superfamily proteins, including transcription factors and mRNA splicing factors	K09422	3e-105	380	pop:POPTR_581214	myb proto-oncogene protein, plant	-	GO:0003677//DNA binding;GO:0003682//chromatin binding	-	--
Unigene39316_All	360	1	24	0.1268	3.2509	4.68021	Up	3.56888e-07	3.96608e-06	gi|449448584|ref|XP_004142046.1|	129.4	1e-29	PREDICTED: uncharacterized protein LOC101207587 [Cucumis sativus] >gi|449497735|ref|XP_004160502.1| PREDICTED: uncharacterized LOC101207587 [Cucumis sativus]	--	--	--	--	sp|Q9FGF8|ABR1_ARATH	54.7	1e-08	Ethylene-responsive transcription factor ABR1 OS=Arabidopsis thaliana GN=ABR1 PE=2 SV=1	--	--	--	--	--	--	--	--	--	--	GO:0009987//cellular process;GO:1901700;GO:0010033//response to organic substance	-	-	--
CL7020.Contig1_All	662	94	2208	6.4796	162.645	4.64967	Up	0	0	gi|449460756|ref|XP_004148111.1|	205.7	5e-52	PREDICTED: uncharacterized protein LOC101204313 [Cucumis sativus]	gi|449483975|ref|XM_004156700.1|	85.7	5e-14	PREDICTED: Cucumis sativus S-norcoclaurine synthase-like, transcript variant 2 (LOC101230334), mRNA	sp|Q67A25|NCS_THLFG	108	3e-24	S-norcoclaurine synthase OS=Thalictrum flavum subsp. glaucum PE=1 SV=1	--	--	--	--	--	--	--	--	--	--	-	-	-	--
Unigene278_All	826	1	23	0.0552	1.3578	4.62046	Up	7.10854e-07	7.47564e-06	gi|449523035|ref|XP_004168530.1|	177.2	2e-43	PREDICTED: LOW QUALITY PROTEIN: linoleate 13S-lipoxygenase 2-1, chloroplastic-like [Cucumis sativus]	gi|449530078|ref|XM_004171976.1|	107	2e-20	PREDICTED: Cucumis sativus linoleate 13S-lipoxygenase 2-1, chloroplastic-like (LOC101214639), mRNA	sp|O24370|LOX21_SOLTU	112	3e-25	Linoleate 13S-lipoxygenase 2-1, chloroplastic OS=Solanum tuberosum GN=LOX2.1 PE=1 SV=1	--	--	--	--	--	K00454	5e-36	149	rcu:RCOM_1576890	lipoxygenase [EC:1.13.11.12]	GO:0050896//response to stimulus;GO:0072330	GO:0016491//oxidoreductase activity	GO:0044434	--
Unigene28837_All	209	1	23	0.2183	5.3664	4.61957	Up	7.10854e-07	7.47447e-06	--	--	--	--	--	--	--	--	--	--	--	--	--	--	--	--	--	--	--	--	--	--	-	-	-	--
Unigene6173_All	341	1	23	0.1338	3.2891	4.61954	Up	7.10854e-07	7.47913e-06	gi|83715794|emb|CAI54278.1|	145.6	2e-34	flavonoid-3&apos;-hydroxylase [Vitis vinifera]	gi|449477167|ref|XM_004154901.1|	85.7	3e-14	PREDICTED: Cucumis sativus flavonoid 3'-monooxygenase-like (LOC101207160), mRNA	sp|Q9SBQ9|F3PH_PETHY	121	1e-28	Flavonoid 3'-monooxygenase OS=Petunia hybrida GN=CYP75B2 PE=2 SV=1	--	--	--	--	--	K05280	1e-35	145	vvi:100232999	flavonoid 3'-monooxygenase [EC:1.14.13.21]	GO:0009411//response to UV;GO:0055114//oxidation-reduction process	GO:0020037//heme binding;GO:0016705//oxidoreductase activity, acting on paired donors, with incorporation or reduction of molecular oxygen;GO:0004497//monooxygenase activity;GO:0005506//iron ion binding;GO:0009055//electron carrier activity	-	--
Unigene21786_All	299	1	23	0.1526	3.7511	4.61949	Up	7.10854e-07	7.47796e-06	--	--	--	--	--	--	--	--	--	--	--	--	--	--	--	--	--	--	--	--	--	--	-	-	-	--
CL3406.Contig2_All	283	2	46	0.3225	7.9263	4.61928	Up	9.5004e-13	1.89305e-11	gi|449531531|ref|XP_004172739.1|	185.3	2e-46	PREDICTED: trans-cinnamate 4-monooxygenase-like [Cucumis sativus]	gi|449467332|ref|XM_004151330.1|	254	4e-65	PREDICTED: Cucumis sativus trans-cinnamate 4-monooxygenase-like (LOC101205537), mRNA	sp|Q43240|TCMO_ZINEL	141	8e-35	Trans-cinnamate 4-monooxygenase OS=Zinnia elegans GN=CYP73A12 PE=2 SV=1	alr1450	53.5	9e-08	COG2124	Cytochrome P450	K00487	1e-44	175	pop:POPTR_584578	trans-cinnamate 4-monooxygenase [EC:1.14.13.11]	GO:0055114//oxidation-reduction process	GO:0020037//heme binding;GO:0016710//trans-cinnamate 4-monooxygenase activity;GO:0005506//iron ion binding;GO:0009055//electron carrier activity	-	--
Unigene16195_All	217	1	23	0.2103	5.1685	4.61922	Up	7.10854e-07	7.4768e-06	--	--	--	--	--	--	--	--	--	--	--	--	--	--	--	--	--	--	--	--	--	--	-	-	-	--
Unigene26617_All	1853	261	5893	6.4275	155.081	4.59262	Up	0	0	gi|449489886|ref|XP_004158449.1|	815.1	0	PREDICTED: LOW QUALITY PROTEIN: cytokinin dehydrogenase 3-like [Cucumis sativus]	gi|449489885|ref|XM_004158401.1|	609	1e-171	PREDICTED: Cucumis sativus cytokinin dehydrogenase 3-like (LOC101222481), mRNA	sp|Q9LTS3|CKX3_ARATH	590	7e-169	Cytokinin dehydrogenase 3 OS=Arabidopsis thaliana GN=CKX3 PE=1 SV=1	all0324	147	8e-35	COG0277	FAD/FMN-containing dehydrogenases	K00279	0	744	rcu:RCOM_1047010	cytokinin dehydrogenase [EC:1.5.99.12]	GO:0009690//cytokinin metabolic process;GO:0055114//oxidation-reduction process	GO:0008131//primary amine oxidase activity;GO:0050660//flavin adenine dinucleotide binding;GO:0008762//UDP-N-acetylmuramate dehydrogenase activity;GO:0019139//cytokinin dehydrogenase activity	GO:0005773//vacuole;GO:0005788//endoplasmic reticulum lumen	--
Unigene31828_All	852	9	200	0.482	11.4469	4.56978	Up	3.5564e-51	2.64437e-49	gi|449448942|ref|XP_004142224.1|	144.8	1e-33	PREDICTED: myb-related protein 308-like [Cucumis sativus] >gi|449503640|ref|XP_004162103.1| PREDICTED: myb-related protein 308-like [Cucumis sativus]	gi|449503639|ref|XM_004162055.1|	67.9	2e-08	PREDICTED: Cucumis sativus myb-related protein 308-like (LOC101211508), mRNA	--	--	--	--	--	--	--	--	--	K09422	1e-08	58.5	vvi:100243210	myb proto-oncogene protein, plant	-	-	-	--
Unigene39896_All	231	1	22	0.1975	4.6442	4.55551	Up	1.41378e-06	1.41523e-05	gi|449515251|ref|XP_004164663.1|	110.2	1e-23	PREDICTED: probable glycerol-3-phosphate acyltransferase 3-like [Cucumis sativus]	gi|449515250|ref|XM_004164615.1|	81.8	3e-13	PREDICTED: Cucumis sativus probable glycerol-3-phosphate acyltransferase 3-like (LOC101218362), mRNA	sp|Q9FZ22|GPAT2_ARATH	99.8	3e-22	Probable glycerol-3-phosphate acyltransferase 2 OS=Arabidopsis thaliana GN=GPAT2 PE=2 SV=1	--	--	--	--	--	K13508	7e-24	106	rcu:RCOM_1346290	glycerol-3-phosphate acyltransferase [EC:2.3.1.15]	GO:0006655//phosphatidylglycerol biosynthetic process	GO:0016746//transferase activity, transferring acyl groups	GO:0005739//mitochondrion	--
Unigene39296_All	222	1	22	0.2056	4.8325	4.55486	Up	1.41378e-06	1.41544e-05	--	--	--	--	--	--	--	--	--	--	--	--	--	--	--	--	--	--	--	--	--	--	-	-	-	--
CL7734.Contig1_All	2422	10	216	0.1884	4.3489	4.52878	Up	7.28272e-55	5.82523e-53	gi|449440327|ref|XP_004137936.1|	1025.4	0	PREDICTED: laccase-17-like [Cucumis sativus]	gi|449518967|ref|XM_004166459.1|	515	1e-143	PREDICTED: Cucumis sativus laccase-17-like (LOC101205653), mRNA	sp|Q9FJD5|LAC17_ARATH	859	0	Laccase-17 OS=Arabidopsis thaliana GN=LAC17 PE=2 SV=1	SPAC1F7.08	145	3e-34	COG2132	Putative multicopper oxidases	K00423	5e-64	244	ppp:PHYPADRAFT_163787	L-ascorbate oxidase [EC:1.10.3.3]	GO:0046274//lignin catabolic process;GO:0055114//oxidation-reduction process	GO:0005507//copper ion binding;GO:0052716//hydroquinone:oxygen oxidoreductase activity;GO:0008447//L-ascorbate oxidase activity	GO:0048046//apoplast	--
CL7902.Contig2_All	1913	15	318	0.3578	8.1061	4.50178	Up	8.26408e-80	9.30935e-78	gi|359488181|ref|XP_002280096.2|	353.6	7e-96	PREDICTED: uncharacterized protein LOC100249716 [Vitis vinifera]	gi|460386509|ref|XM_004238893.1|	61.9	2e-06	PREDICTED: Solanum lycopersicum uncharacterized LOC101258366 (LOC101258366), mRNA	--	--	--	--	--	--	--	--	--	K03453	8e-14	77.4	vcn:VOLCADRAFT_102664	bile acid:Na+ symporter, BASS family	-	-	-	--
Unigene23337_All	1252	79	1668	2.8794	64.9666	4.49586	Up	0	0	gi|449465822|ref|XP_004150626.1|	778.9	0	PREDICTED: laccase-4-like [Cucumis sativus] >gi|449524446|ref|XP_004169234.1| PREDICTED: laccase-4-like [Cucumis sativus]	gi|449465821|ref|XM_004150578.1|	1481	0	PREDICTED: Cucumis sativus laccase-4-like (LOC101214279), mRNA >gi|449524445|ref|XM_004169186.1| PREDICTED: Cucumis sativus laccase-4-like (LOC101214279), mRNA	sp|O80434|LAC4_ARATH	647	0	Laccase-4 OS=Arabidopsis thaliana GN=IRX12 PE=2 SV=2	SPAC1F7.08	113	8e-25	COG2132	Putative multicopper oxidases	K00423	4e-42	170	rcu:RCOM_0657480	L-ascorbate oxidase [EC:1.10.3.3]	GO:0009834//secondary cell wall biogenesis;GO:0046274//lignin catabolic process;GO:0055114//oxidation-reduction process	GO:0005507//copper ion binding;GO:0052716//hydroquinone:oxygen oxidoreductase activity;GO:0008447//L-ascorbate oxidase activity	GO:0048046//apoplast	--
CL3220.Contig3_All	1948	12	253	0.2811	6.3333	4.4938	Up	1.01088e-63	9.33397e-62	gi|343466179|gb|AEM42983.1|	117.1	0	cytochrome P450 [Siraitia grosvenorii]	gi|343466178|gb|HQ128568.1|	2099	0	Siraitia grosvenorii cytochrome P450 (P450-2) mRNA, complete cds	sp|Q7XU38|C87A3_ORYSJ	257	2e-116	Cytochrome P450 87A3 OS=Oryza sativa subsp. japonica GN=CYP87A3 PE=2 SV=3	slr0574	89.7	2e-17	COG2124	Cytochrome P450	K00030	2e-103	333	vvi:100242228	isocitrate dehydrogenase (NAD+) [EC:1.1.1.41]	-	GO:0046872//metal ion binding;GO:0004497//monooxygenase activity;GO:0016705//oxidoreductase activity, acting on paired donors, with incorporation or reduction of molecular oxygen	GO:0016023//cytoplasmic membrane-bounded vesicle	--
CL5995.Contig1_All	432	1	21	0.1056	2.3705	4.48851	Up	2.80728e-06	2.66079e-05	--	--	--	--	--	--	--	--	--	--	--	--	--	--	--	--	--	--	--	--	--	--	-	-	-	--
Unigene37550_All	205	1	21	0.2226	4.9953	4.48805	Up	2.80728e-06	2.66042e-05	gi|449524262|ref|XP_004169142.1|	94.7	4e-19	PREDICTED: LOW QUALITY PROTEIN: violaxanthin de-epoxidase, chloroplastic-like [Cucumis sativus]	gi|449524261|ref|XM_004169094.1|	188	1e-45	PREDICTED: Cucumis sativus violaxanthin de-epoxidase, chloroplastic-like (LOC101216870), mRNA	--	--	--	--	--	--	--	--	--	--	--	--	--	--	-	-	-	--
Unigene36096_All	259	1	21	0.1762	3.9538	4.48795	Up	2.80728e-06	2.66154e-05	--	--	--	--	--	--	--	--	--	--	--	--	--	--	--	--	--	--	--	--	--	--	-	-	-	--
Unigene40010_All	268	1	21	0.1703	3.8211	4.48784	Up	2.80728e-06	2.66117e-05	gi|449475908|ref|XP_004154585.1|	171	5e-42	PREDICTED: niemann-Pick C1 protein-like [Cucumis sativus]	gi|449475907|ref|XM_004154537.1|	325	1e-86	PREDICTED: Cucumis sativus niemann-Pick C1 protein-like (LOC101230996), mRNA	--	--	--	--	--	--	--	--	--	K12385	2e-35	145	pop:POPTR_721264	Niemann-Pick C1 protein	GO:0030301//cholesterol transport	GO:0008158//hedgehog receptor activity	GO:0005774//vacuolar membrane;GO:0016021//integral to membrane;GO:0009507//chloroplast	--
Unigene13625_All	1429	84	1751	2.6824	59.752	4.47739	Up	0	0	gi|343466225|gb|AEM43006.1|	911.8	0	cytochrome P450 [Siraitia grosvenorii]	gi|343466224|gb|HQ259627.1|	2674	0	Siraitia grosvenorii cytochrome P450 (P450-6) mRNA, complete cds	sp|Q42602|C89A2_ARATH	432	2e-121	Cytochrome P450 89A2 OS=Arabidopsis thaliana GN=CYP89A2 PE=2 SV=2	BH0579	67.4	6e-11	COG2124	Cytochrome P450	K00517	7e-104	375	osa:4349111	[EC:1.14.-.-]	-	GO:0016491//oxidoreductase activity;GO:0005488//binding	-	--
CL38.Contig3_All	2078	117	2413	2.5693	56.6253	4.462	Up	0	0	gi|449460379|ref|XP_004147923.1|	1095.5	0	PREDICTED: laccase-4-like [Cucumis sativus] >gi|449516581|ref|XP_004165325.1| PREDICTED: laccase-4-like [Cucumis sativus]	gi|449460378|ref|XM_004147875.1|	1996	0	PREDICTED: Cucumis sativus laccase-4-like (LOC101217849), mRNA >gi|449516580|ref|XM_004165277.1| PREDICTED: Cucumis sativus laccase-4-like (LOC101223890), mRNA	sp|O80434|LAC4_ARATH	926	0	Laccase-4 OS=Arabidopsis thaliana GN=IRX12 PE=2 SV=2	YFL041w	161	4e-39	COG2132	Putative multicopper oxidases	K00423	2e-65	249	ppp:PHYPADRAFT_163787	L-ascorbate oxidase [EC:1.10.3.3]	GO:0009834//secondary cell wall biogenesis;GO:0046274//lignin catabolic process;GO:0055114//oxidation-reduction process	GO:0005507//copper ion binding;GO:0052716//hydroquinone:oxygen oxidoreductase activity;GO:0008447//L-ascorbate oxidase activity	GO:0048046//apoplast	--
Unigene26143_All	1269	14	286	0.5034	10.9901	4.44836	Up	2.1457e-71	2.21413e-69	gi|356523789|ref|XP_003530517.1|	65.1	1e-44	PREDICTED: uncharacterized protein LOC100800881 [Glycine max]	--	--	--	--	--	--	--	--	--	--	--	--	--	--	--	--	--	--	-	-	-	--
Unigene30947_All	841	70	1407	3.7982	81.5824	4.42487	Up	0	0	gi|449464068|ref|XP_004149751.1|	366.3	3e-100	PREDICTED: probable WRKY transcription factor 41-like [Cucumis sativus]	gi|449464067|ref|XM_004149703.1|	704	0	PREDICTED: Cucumis sativus probable WRKY transcription factor 41-like (LOC101204004), mRNA	sp|Q8H0Y8|WRK41_ARATH	119	2e-27	Probable WRKY transcription factor 41 OS=Arabidopsis thaliana GN=WRKY41 PE=2 SV=2	--	--	--	--	--	K13426	1e-10	65.5	vvi:100251862	WRKY transcription factor 29	-	-	-	--
Unigene39207_All	557	1	20	0.0819	1.7509	4.41809	Up	5.56456e-06	5.01203e-05	gi|449451970|ref|XP_004143733.1|	218.4	5e-56	PREDICTED: lignin-forming anionic peroxidase-like [Cucumis sativus] >gi|449521798|ref|XP_004167916.1| PREDICTED: lignin-forming anionic peroxidase-like [Cucumis sativus]	--	--	--	--	sp|Q9LEH3|PER15_IPOBA	169	9e-43	Peroxidase 15 OS=Ipomoea batatas GN=pod PE=1 SV=1	--	--	--	--	--	K00430	2e-45	179	vvi:100265513	peroxidase [EC:1.11.1.7]	GO:0055114//oxidation-reduction process;GO:0006979//response to oxidative stress	GO:0020037//heme binding;GO:0046872//metal ion binding;GO:0004601//peroxidase activity	-	--
Unigene40075_All	234	1	20	0.195	4.1679	4.41777	Up	5.56456e-06	5.01003e-05	--	--	--	--	--	--	--	--	--	--	--	--	--	--	--	--	--	--	--	--	--	--	-	-	-	--
Unigene39637_All	210	1	20	0.2173	4.6442	4.41767	Up	5.56456e-06	5.0107e-05	--	--	--	--	--	--	--	--	--	--	--	--	--	--	--	--	--	--	--	--	--	--	-	-	-	--
Unigene39228_All	349	1	20	0.1308	2.7945	4.41716	Up	5.56456e-06	5.01137e-05	gi|449496961|ref|XP_004160275.1|	155.2	2e-37	PREDICTED: putative beta-glucosidase 41-like [Cucumis sativus]	gi|225312159|dbj|AK326897.1|	83.8	1e-13	Solanum lycopersicum cDNA, clone: LEFL2016J03, HTC in fruit	sp|Q0DA21|BGL25_ORYSJ	107	2e-24	Beta-glucosidase 25 OS=Oryza sativa subsp. japonica GN=BGLU25 PE=2 SV=2	CAC1084	68.2	4e-12	COG2723	Beta-glucosidase/6-phospho-beta-glucosidase/beta-galactosidase	K01188	1e-19	92.4	rcu:RCOM_1621030	beta-glucosidase [EC:3.2.1.21]	GO:0005975//carbohydrate metabolic process	GO:0008422//beta-glucosidase activity;GO:0043169//cation binding	GO:0005576//extracellular region;GO:0009505//plant-type cell wall	--
Unigene29021_All	398	1	20	0.1147	2.4504	4.41708	Up	5.56456e-06	5.00936e-05	gi|449443211|ref|XP_004139373.1|	140.6	7e-33	PREDICTED: uncharacterized protein LOC101217350 [Cucumis sativus]	gi|449443210|ref|XM_004139325.1|	200	8e-49	PREDICTED: Cucumis sativus uncharacterized LOC101217350 (LOC101217350), mRNA	--	--	--	--	--	--	--	--	--	--	--	--	--	--	-	-	GO:0005634//nucleus	--
CL5894.Contig5_All	1751	1	20	0.0261	0.557	4.41556	Up	5.56456e-06	5.0087e-05	gi|449452338|ref|XP_004143916.1|	114	8e-24	PREDICTED: 4-coumarate--CoA ligase-like 10-like [Cucumis sativus] >gi|449495827|ref|XP_004159956.1| PREDICTED: 4-coumarate--CoA ligase-like 10-like [Cucumis sativus]	gi|449495826|ref|XM_004159908.1|	997	0	PREDICTED: Cucumis sativus 4-coumarate--CoA ligase-like 10-like (LOC101225382), mRNA	sp|Q9SMT7|4CLLA_ARATH	591	0	4-coumarate--CoA ligase-like 10 OS=Arabidopsis thaliana GN=4CLL10 PE=2 SV=1	SPCC1827.03c	371	2e-102	COG0318	Acyl-CoA synthetases (AMP-forming)/AMP-acid ligases II	K01904	3e-45	166	rcu:RCOM_0473330	4-coumarate--CoA ligase [EC:6.2.1.12]	GO:0046686//response to cadmium ion;GO:0008152//metabolic process	GO:0008756//o-succinylbenzoate-CoA ligase activity	GO:0048046//apoplast;GO:0009507//chloroplast	--
Unigene26694_All	590	20	384	1.5469	31.7379	4.35875	Up	4.02666e-94	5.37862e-92	gi|449442675|ref|XP_004139106.1|	242.3	3e-63	PREDICTED: uncharacterized protein LOC101211330 [Cucumis sativus] >gi|449485355|ref|XP_004157143.1| PREDICTED: uncharacterized protein LOC101231955 [Cucumis sativus]	gi|449485354|ref|XM_004157095.1|	285	3e-74	PREDICTED: Cucumis sativus uncharacterized LOC101231955 (LOC101231955), mRNA	--	--	--	--	--	--	--	--	--	--	--	--	--	--	-	-	-	--
Unigene31806_All	1274	14	268	0.5015	10.258	4.35436	Up	4.28172e-66	4.11076e-64	gi|449470090|ref|XP_004152751.1|	363.6	4e-99	PREDICTED: RING-H2 finger protein ATL54-like [Cucumis sativus] >gi|449513098|ref|XP_004164230.1| PREDICTED: RING-H2 finger protein ATL54-like [Cucumis sativus]	gi|449470089|ref|XM_004152703.1|	153	5e-34	PREDICTED: Cucumis sativus RING-H2 finger protein ATL54-like (LOC101209492), mRNA >gi|449513097|ref|XM_004164182.1| PREDICTED: Cucumis sativus RING-H2 finger protein ATL54-like (LOC101209492), mRNA	sp|Q8LFY8|ATL54_ARATH	183	2e-46	RING-H2 finger protein ATL54 OS=Arabidopsis thaliana GN=ATL54 PE=2 SV=2	ECU07g0330	69.3	1e-11	COG5540	RING-finger-containing ubiquitin ligase	K05283	1e-21	102	aly:ARALYDRAFT_354960	phosphatidylinositol glycan, class W [EC:2.3.-.-]	-	-	-	--
CL2295.Contig1_All	731	25	477	1.5606	31.82	4.34976	Up	2.19806e-116	3.65923e-114	gi|449517441|ref|XP_004165754.1|	250.8	1e-65	PREDICTED: 14 kDa proline-rich protein DC2.15-like [Cucumis sativus]	gi|349713766|emb|FQ379858.1|	93.7	2e-16	Vitis vinifera clone SS0AEA1YC12	sp|P14009|14KD_DAUCA	165	2e-41	14 kDa proline-rich protein DC2.15 OS=Daucus carota PE=2 SV=1	--	--	--	--	--	K01115	3e-08	57	vcn:VOLCADRAFT_99471	phospholipase D [EC:3.1.4.4]	GO:0006869//lipid transport	GO:0008289//lipid binding	-	--
CL1318.Contig17_All	759	1	19	0.0601	1.2207	4.3442	Up	1.1009e-05	9.32444e-05	gi|449485553|ref|XP_004157206.1|	452.6	3e-126	PREDICTED: PI-PLC X domain-containing protein At5g67130-like [Cucumis sativus]	gi|449485552|ref|XM_004157158.1|	827	0	PREDICTED: Cucumis sativus PI-PLC X domain-containing protein At5g67130-like (LOC101224217), mRNA	sp|Q93XX5|Y5713_ARATH	315	1e-86	PI-PLC X domain-containing protein At5g67130 OS=Arabidopsis thaliana GN=At5g67130 PE=1 SV=1	--	--	--	--	--	--	--	--	--	--	GO:0006629//lipid metabolic process;GO:0006468//protein phosphorylation	GO:0008081//phosphoric diester hydrolase activity;GO:0005524//ATP binding;GO:0004674//protein serine/threonine kinase activity	-	--
Unigene12756_All	240	1	19	0.1901	3.8605	4.34396	Up	1.1009e-05	9.32327e-05	--	--	--	--	--	--	--	--	--	--	--	--	--	--	--	--	--	--	--	--	--	--	-	-	-	--
Unigene39766_All	223	1	19	0.2046	4.1548	4.3439	Up	1.1009e-05	9.3256e-05	--	--	--	--	--	--	--	--	--	--	--	--	--	--	--	--	--	--	--	--	--	--	-	-	-	--
CL1046.Contig2_All	363	1	19	0.1257	2.5524	4.3438	Up	1.1009e-05	9.32093e-05	gi|449523035|ref|XP_004168530.1|	114.8	4e-25	PREDICTED: LOW QUALITY PROTEIN: linoleate 13S-lipoxygenase 2-1, chloroplastic-like [Cucumis sativus]	gi|449530078|ref|XM_004171976.1|	107	8e-21	PREDICTED: Cucumis sativus linoleate 13S-lipoxygenase 2-1, chloroplastic-like (LOC101214639), mRNA	sp|O24370|LOX21_SOLTU	80.9	2e-16	Linoleate 13S-lipoxygenase 2-1, chloroplastic OS=Solanum tuberosum GN=LOX2.1 PE=1 SV=1	--	--	--	--	--	K00454	1e-22	102	vvi:100257867	lipoxygenase [EC:1.13.11.12]	GO:0050896//response to stimulus;GO:0072330	GO:0016491//oxidoreductase activity	GO:0044434	--
Unigene36630_All	303	1	19	0.1506	3.0578	4.3437	Up	1.1009e-05	9.3186e-05	--	--	--	--	--	--	--	--	--	--	--	--	--	--	--	--	--	--	--	--	--	--	-	-	-	--
Unigene19261_All	255	2	38	0.3579	7.2668	4.34369	Up	2.2385e-10	3.67764e-09	gi|449448808|ref|XP_004142157.1|	101.3	4e-21	PREDICTED: uncharacterized protein LOC101214802 [Cucumis sativus]	--	--	--	--	--	--	--	--	--	--	--	--	--	--	--	--	--	--	GO:0042398//cellular modified amino acid biosynthetic process;GO:0006952//defense response;GO:0006598//polyamine catabolic process;GO:0009807//lignan biosynthetic process	-	GO:0005576//extracellular region	--
Unigene15461_All	216	3	57	0.6338	12.8683	4.34365	Up	5.106e-15	1.19168e-13	--	--	--	--	gi|147857950|emb|AM433247.2|	60	9e-07	Vitis vinifera contig VV78X032520.5, whole genome shotgun sequence	--	--	--	--	--	--	--	--	--	--	--	--	--	--	-	-	-	--
Unigene40025_All	212	1	19	0.2153	4.3704	4.34335	Up	1.1009e-05	9.3221e-05	--	--	--	--	--	--	--	--	--	--	--	--	--	--	--	--	--	--	--	--	--	--	-	-	-	--
Unigene3060_All	331	1	19	0.1379	2.7991	4.34327	Up	1.1009e-05	9.31976e-05	gi|449531121|ref|XP_004172536.1|	52.4	2e-06	PREDICTED: uncharacterized LOC101224273, partial [Cucumis sativus]	gi|449531120|ref|XM_004172488.1|	99.6	2e-18	PREDICTED: Cucumis sativus uncharacterized LOC101224273 (LOC101224273), partial mRNA	--	--	--	--	--	--	--	--	--	--	--	--	--	--	-	-	-	--
Unigene39789_All	325	2	37	0.2808	5.5516	4.30529	Up	4.40998e-10	7.03816e-09	gi|449482795|ref|XP_004156406.1|	144.4	5e-34	PREDICTED: probable LRR receptor-like serine/threonine-protein kinase At3g47570-like [Cucumis sativus]	gi|449482794|ref|XM_004156358.1|	63.9	9e-08	PREDICTED: Cucumis sativus probable LRR receptor-like serine/threonine-protein kinase At3g47570-like (LOC101223995), mRNA	sp|Q9LP77|Y1848_ARATH	58.9	6e-10	Probable inactive receptor kinase At1g48480 OS=Arabidopsis thaliana GN=RKL1 PE=1 SV=1	--	--	--	--	--	K13415	2e-07	52	aly:ARALYDRAFT_912402	protein brassinosteroid insensitive 1 [EC:2.7.10.1 2.7.11.1]	GO:0016310//phosphorylation	GO:0016491//oxidoreductase activity;GO:0004672//protein kinase activity;GO:0000166//nucleotide binding	GO:0016020//membrane	--
Unigene19393_All	420	2	37	0.2173	4.2959	4.3052	Up	4.40998e-10	7.03982e-09	gi|147838247|emb|CAN71828.1|	34.3	3e-08	hypothetical protein VITISV_020654 [Vitis vinifera]	--	--	--	--	--	--	--	--	--	--	--	--	--	--	--	--	--	--	-	-	-	--
Unigene15839_All	541	2	37	0.1687	3.3351	4.3052	Up	4.40998e-10	7.0365e-09	--	--	--	--	--	--	--	--	--	--	--	--	--	--	--	--	--	--	--	--	--	--	-	-	-	--
Unigene25746_All	231	4	74	0.7902	15.6213	4.30515	Up	4.744e-19	1.38746e-17	--	--	--	--	--	--	--	--	--	--	--	--	--	--	--	--	--	--	--	--	--	--	-	-	-	--
Unigene5856_All	416	2	37	0.2194	4.3372	4.30513	Up	4.40998e-10	7.04149e-09	--	--	--	--	--	--	--	--	--	--	--	--	--	--	--	--	--	--	--	--	--	--	-	-	-	--
Unigene3074_All	423	4	73	0.4315	8.4155	4.28562	Up	9.32284e-19	2.67454e-17	gi|225460987|ref|XP_002278220.1|	74.3	6e-13	PREDICTED: uncharacterized protein LOC100260689 [Vitis vinifera]	--	--	--	--	--	--	--	--	--	--	--	--	--	--	--	--	--	--	-	-	-	--
CL8480.Contig2_All	594	1	18	0.0768	1.4777	4.2661	Up	2.17352e-05	0.000173075	--	--	--	--	--	--	--	--	--	--	--	--	--	--	--	--	--	--	--	--	--	--	-	-	-	--
Unigene12125_All	585	2	36	0.156	3.0009	4.26578	Up	8.67732e-10	1.34609e-08	gi|449442118|ref|XP_004138829.1|	208.4	5e-53	PREDICTED: ethylene-responsive transcription factor ERF019-like [Cucumis sativus] >gi|449490258|ref|XP_004158553.1| PREDICTED: ethylene-responsive transcription factor ERF019-like [Cucumis sativus]	gi|449442117|ref|XM_004138781.1|	230	1e-57	PREDICTED: Cucumis sativus ethylene-responsive transcription factor ERF019-like (LOC101221442), mRNA >gi|449490257|ref|XM_004158505.1| PREDICTED: Cucumis sativus ethylene-responsive transcription factor ERF019-like (LOC101221442), mRNA	sp|Q9C9I8|ERF20_ARATH	135	1e-32	Ethylene-responsive transcription factor ERF020 OS=Arabidopsis thaliana GN=ERF020 PE=2 SV=1	--	--	--	--	--	K09286	7e-19	91.7	rcu:RCOM_1589590	EREBP-like factor	GO:0010200//response to chitin;GO:0006351//transcription, DNA-dependent	-	GO:0005737//cytoplasm;GO:0005634//nucleus	--
CL5209.Contig2_All	306	5	90	0.7456	14.3423	4.26573	Up	8.88376e-23	3.10468e-21	gi|356573851|ref|XP_003555069.1|	125.6	2e-28	PREDICTED: probable non-specific lipid-transfer protein AKCS9-like [Glycine max]	--	--	--	--	sp|Q43681|NLTP_VIGUN	109	4e-25	Probable non-specific lipid-transfer protein AKCS9 OS=Vigna unguiculata PE=2 SV=1	--	--	--	--	--	--	--	--	--	--	-	-	-	--
Unigene18358_All	354	1	18	0.1289	2.4795	4.26573	Up	2.17352e-05	0.000173157	--	--	--	--	--	--	--	--	--	--	--	--	--	--	--	--	--	--	--	--	--	--	-	-	-	--
Unigene24795_All	213	3	54	0.6427	12.3627	4.2657	Up	3.88506e-14	8.57848e-13	--	--	--	--	--	--	--	--	--	--	--	--	--	--	--	--	--	--	--	--	--	--	-	-	-	--
Unigene40217_All	243	1	18	0.1878	3.6121	4.26557	Up	2.17352e-05	0.000173136	--	--	--	--	--	--	--	--	--	--	--	--	--	--	--	--	--	--	--	--	--	--	-	-	-	--
Unigene39297_All	356	1	18	0.1282	2.4656	4.26547	Up	2.17352e-05	0.000173116	gi|449459858|ref|XP_004147663.1|	205.7	1e-52	PREDICTED: LOW QUALITY PROTEIN: uncharacterized protein LOC101213129 [Cucumis sativus]	gi|449459857|ref|XM_004147615.1|	470	1e-130	PREDICTED: Cucumis sativus uncharacterized LOC101213129 (LOC101213129), mRNA	--	--	--	--	--	--	--	--	--	--	--	--	--	--	GO:0007165//signal transduction	GO:0035091//phosphatidylinositol binding	GO:0009506//plasmodesma;GO:0009507//chloroplast	--
CL2971.Contig5_All	762	1	18	0.0599	1.1519	4.26532	Up	2.17352e-05	0.000173095	gi|449449641|ref|XP_004142573.1|	178.7	8e-44	PREDICTED: putative pseudouridine synthase C1A4.09-like [Cucumis sativus]	gi|449479757|ref|XM_004155651.1|	228	7e-57	PREDICTED: Cucumis sativus multisubstrate pseudouridine synthase 7-like (LOC101226635), mRNA	--	--	--	--	YOR243c	57	3e-08	COG0585	Uncharacterized conserved protein	K06176	3e-30	130	rcu:RCOM_1427850	tRNA pseudouridine13 synthase [EC:5.4.99.27]	GO:0009560//embryo sac egg cell differentiation;GO:0000741//karyogamy	GO:0009982//pseudouridine synthase activity	GO:0043231//intracellular membrane-bounded organelle	--
Unigene30966_All	843	62	1113	3.3562	64.3823	4.26176	Up	1.06993e-265	3.68957e-263	gi|449439295|ref|XP_004137421.1|	296.2	4e-79	PREDICTED: uncharacterized protein At5g01610-like [Cucumis sativus] >gi|449486987|ref|XP_004157462.1| PREDICTED: uncharacterized protein At5g01610-like [Cucumis sativus]	gi|449439294|ref|XM_004137373.1|	442	1e-121	PREDICTED: Cucumis sativus uncharacterized LOC101220576 (LOC101220576), mRNA >gi|449486986|ref|XM_004157414.1| PREDICTED: Cucumis sativus uncharacterized LOC101231450 (LOC101231450), mRNA	sp|Q9M015|Y5161_ARATH	166	2e-41	Uncharacterized protein At5g01610 OS=Arabidopsis thaliana GN=At5g01610 PE=1 SV=1	--	--	--	--	--	--	--	--	--	--	-	-	-	--
CL4431.Contig2_All	624	22	394	1.6089	30.79	4.25832	Up	4.6511e-95	6.29986e-93	gi|449449054|ref|XP_004142280.1|	260.4	1e-68	PREDICTED: MLP-like protein 328-like [Cucumis sativus] >gi|449481261|ref|XP_004156130.1| PREDICTED: MLP-like protein 328-like [Cucumis sativus]	gi|449449053|ref|XM_004142232.1|	250	1e-63	PREDICTED: Cucumis sativus MLP-like protein 328-like (LOC101206688), mRNA >gi|449481260|ref|XM_004156082.1| PREDICTED: Cucumis sativus MLP-like protein 328-like (LOC101206688), mRNA	sp|Q9ZVF2|ML329_ARATH	123	7e-29	MLP-like protein 329 OS=Arabidopsis thaliana GN=MLP329 PE=2 SV=1	--	--	--	--	--	--	--	--	--	--	-	-	-	--
Unigene24609_All	638	20	355	1.4305	27.1335	4.24548	Up	1.25839e-85	1.53249e-83	gi|224064478|ref|XP_002301496.1|	115.5	6e-25	predicted protein [Populus trichocarpa] >gi|222843222|gb|EEE80769.1| predicted protein [Populus trichocarpa]	gi|297719600|ref|NM_001185233.1|	81.8	8e-13	Oryza sativa Japonica Group Os01g0132766 (Os01g0132766) mRNA, complete cds	sp|Q39265|ZFP6_ARATH	80.1	9e-16	Zinc finger protein 6 OS=Arabidopsis thaliana GN=ZFP6 PE=2 SV=1	--	--	--	--	--	--	--	--	--	--	-	-	GO:0005622//intracellular	--
CL6284.Contig1_All	405	8	142	0.9014	17.0975	4.24547	Up	4.28068e-35	2.25508e-33	gi|462402738|gb|EMJ08295.1|	198.7	2e-50	hypothetical protein PRUPE_ppa022440mg [Prunus persica]	gi|356498931|ref|XM_003518252.1|	163	2e-37	PREDICTED: Glycine max laccase-4-like (LOC100799138), mRNA	sp|O80434|LAC4_ARATH	184	2e-47	Laccase-4 OS=Arabidopsis thaliana GN=IRX12 PE=2 SV=2	YMR058w	69.7	1e-12	COG2132	Putative multicopper oxidases	K00423	2e-19	92	vvi:100251280	L-ascorbate oxidase [EC:1.10.3.3]	GO:0009834//secondary cell wall biogenesis;GO:0046274//lignin catabolic process;GO:0055114//oxidation-reduction process	GO:0005507//copper ion binding;GO:0052716//hydroquinone:oxygen oxidoreductase activity;GO:0008447//L-ascorbate oxidase activity	GO:0048046//apoplast	--
Unigene20068_All	1797	218	3816	5.5359	103.552	4.2254	Up	0	0	gi|449456018|ref|XP_004145747.1|	652.5	0	PREDICTED: uncharacterized membrane protein At1g06890-like [Cucumis sativus] >gi|449524366|ref|XP_004169194.1| PREDICTED: uncharacterized membrane protein At1g06890-like [Cucumis sativus]	gi|449456017|ref|XM_004145699.1|	1388	0	PREDICTED: Cucumis sativus uncharacterized LOC101216974 (LOC101216974), mRNA >gi|449524365|ref|XM_004169146.1| PREDICTED: Cucumis sativus uncharacterized LOC101216974 (LOC101216974), mRNA	sp|Q8RXL8|Y1689_ARATH	446	2e-125	Uncharacterized membrane protein At1g06890 OS=Arabidopsis thaliana GN=At1g06890 PE=1 SV=1	ECU03g0150	58.2	5e-08	COG5070	Nucleotide-sugar transporter	K15285	2e-169	593	vvi:100244931	solute carrier family 35, member E3	-	-	GO:0016023//cytoplasmic membrane-bounded vesicle;GO:0016021//integral to membrane;GO:0005886//plasma membrane	--
Unigene6942_All	1348	4	70	0.1354	2.5323	4.22515	Up	7.04688e-18	1.93772e-16	gi|449532637|ref|XP_004173287.1|	259.6	9e-68	PREDICTED: protein ODORANT1-like [Cucumis sativus]	gi|449532636|ref|XM_004173239.1|	147	4e-32	PREDICTED: Cucumis sativus protein ODORANT1-like (LOC101232681), mRNA	sp|Q50EX6|ODO1_PETHY	145	5e-35	Protein ODORANT1 OS=Petunia hybrida GN=ODO1 PE=2 SV=1	--	--	--	--	--	K09422	3e-50	197	pop:POPTR_581214	myb proto-oncogene protein, plant	-	-	-	--
Unigene39473_All	244	6	105	1.1221	20.9845	4.22505	Up	3.3109e-26	1.33044e-24	--	--	--	--	--	--	--	--	--	--	--	--	--	--	--	--	--	--	--	--	--	--	-	-	-	--
Unigene9230_All	264	2	35	0.3457	6.4649	4.22504	Up	1.70521e-09	2.55438e-08	gi|449446167|ref|XP_004140843.1|	143.7	8e-34	PREDICTED: protein O-glucosyltransferase 1-like [Cucumis sativus]	gi|449446166|ref|XM_004140795.1|	141	4e-31	PREDICTED: Cucumis sativus protein O-glucosyltransferase 1-like (LOC101213751), mRNA	--	--	--	--	--	--	--	--	--	K13667	5e-23	103	gmx:100797600	protein glucosyltransferase [EC:2.4.1.-]	-	-	GO:0005802//trans-Golgi network;GO:0005576//extracellular region;GO:0005794//Golgi apparatus;GO:0005768//endosome	--
Unigene39483_All	246	2	35	0.371	6.938	4.22503	Up	1.70521e-09	2.55381e-08	--	--	--	--	--	--	--	--	--	--	--	--	--	--	--	--	--	--	--	--	--	--	-	-	-	--
Unigene39558_All	288	2	35	0.3169	5.9262	4.22501	Up	1.70521e-09	2.55494e-08	gi|356527144|ref|XP_003532173.1|	59.3	2e-08	PREDICTED: uncharacterized protein LOC100811551 [Glycine max]	--	--	--	--	--	--	--	--	--	--	--	--	--	--	--	--	--	--	-	-	-	--
Unigene2789_All	397	1	17	0.1149	2.0881	4.18374	Up	4.28142e-05	0.000317334	--	--	--	--	--	--	--	--	--	--	--	--	--	--	--	--	--	--	--	--	--	--	-	-	-	--
CL1373.Contig1_All	324	1	17	0.1408	2.5586	4.18364	Up	4.28142e-05	0.000317264	gi|449508693|ref|XP_004163384.1|	146	1e-34	PREDICTED: MLO-like protein 6-like [Cucumis sativus]	gi|449508692|ref|XM_004163336.1|	115	3e-23	PREDICTED: Cucumis sativus MLO-like protein 6-like (LOC101212018), mRNA	sp|Q94KB7|MLO6_ARATH	79	6e-16	MLO-like protein 6 OS=Arabidopsis thaliana GN=MLO6 PE=2 SV=2	--	--	--	--	--	K08472	3e-16	81.3	aly:ARALYDRAFT_315221	mlo protein	GO:0050896//response to stimulus	-	GO:0016020//membrane	--
CL2133.Contig1_All	292	1	17	0.1563	2.839	4.18299	Up	4.28142e-05	0.000317195	gi|449524980|ref|XP_004169499.1|	167.5	5e-41	PREDICTED: respiratory burst oxidase homolog protein D-like, partial [Cucumis sativus]	gi|449524979|ref|XM_004169451.1|	234	4e-59	PREDICTED: Cucumis sativus respiratory burst oxidase homolog protein D-like (LOC101227472), partial mRNA	sp|Q9SBI0|RBOHB_ARATH	105	6e-24	Respiratory burst oxidase homolog protein B OS=Arabidopsis thaliana GN=RBOHB PE=2 SV=1	--	--	--	--	--	K13447	3e-25	111	ppp:PHYPADRAFT_206166	respiratory burst oxidase [EC:1.6.3.- 1.11.1.-]	GO:0055114//oxidation-reduction process;GO:0009860//pollen tube growth;GO:0009827//plant-type cell wall modification	GO:0016175//superoxide-generating NADPH oxidase activity;GO:0016174//NAD(P)H oxidase activity;GO:0005509//calcium ion binding;GO:0004601//peroxidase activity	GO:0016021//integral to membrane;GO:0005634//nucleus	--
Unigene36705_All	253	1	17	0.1804	3.2766	4.18293	Up	4.28142e-05	0.000317125	gi|255539833|ref|XP_002510981.1|	97.1	9e-20	conserved hypothetical protein [Ricinus communis] >gi|223550096|gb|EEF51583.1| conserved hypothetical protein [Ricinus communis]	gi|449526961|ref|XM_004170434.1|	101	3e-19	PREDICTED: Cucumis sativus lipoxygenase homology domain-containing protein 1-like (LOC101212967), mRNA	--	--	--	--	--	--	--	--	--	--	--	--	--	--	-	-	GO:0016020//membrane;GO:0044444//cytoplasmic part;GO:0043231//intracellular membrane-bounded organelle	--
CL2656.Contig2_All	752	1	17	0.0607	1.1024	4.18281	Up	4.28142e-05	0.00031723	gi|359475964|ref|XP_002279612.2|	34.3	2e-33	PREDICTED: ankyrin repeat-containing protein At2g01680-like [Vitis vinifera]	--	--	--	--	sp|Q9ZU96|Y2168_ARATH	67.8	6e-12	Ankyrin repeat-containing protein At2g01680 OS=Arabidopsis thaliana GN=At2g01680 PE=1 SV=1	RSc0257	62.4	8e-10	COG0666	FOG: Ankyrin repeat	K06694	4e-09	60.1	rcu:RCOM_1621740	26S proteasome non-ATPase regulatory subunit 10	-	-	-	--
Unigene40247_All	312	1	17	0.1463	2.657	4.1828	Up	4.28142e-05	0.00031716	--	--	--	--	--	--	--	--	--	--	--	--	--	--	--	--	--	--	--	--	--	--	-	-	-	--
CL516.Contig14_All	1819	1	17	0.0251	0.4557	4.18233	Up	4.28142e-05	0.000317299	gi|225428113|ref|XP_002280708.1|	147.1	9e-100	PREDICTED: hippocampus abundant transcript 1 protein [Vitis vinifera] >gi|297744560|emb|CBI37822.3| unnamed protein product [Vitis vinifera]	gi|359474999|ref|XM_002280672.2|	93.7	6e-16	PREDICTED: Vitis vinifera uncharacterized LOC100257341 (LOC100257341), mRNA	--	--	--	--	--	--	--	--	--	--	--	--	--	--	GO:0055085//transmembrane transport	GO:0005215//transporter activity	GO:0016021//integral to membrane;GO:0005886//plasma membrane	--
CL2704.Contig1_All	963	24	402	1.1373	20.3563	4.16179	Up	1.88022e-95	2.55699e-93	gi|224104701|ref|XP_002313534.1|	467.6	1e-130	predicted protein [Populus trichocarpa] >gi|222849942|gb|EEE87489.1| predicted protein [Populus trichocarpa]	gi|449496193|ref|XM_004160021.1|	511	1e-142	PREDICTED: Cucumis sativus probable xyloglucan endotransglucosylase/hydrolase protein 31-like (LOC101220217), mRNA	sp|P93046|XTH31_ARATH	417	4e-117	Probable xyloglucan endotransglucosylase/hydrolase protein 31 OS=Arabidopsis thaliana GN=XTH31 PE=2 SV=2	YGR189c	56.2	8e-08	COG2273	Beta-glucanase/Beta-glucan synthetase	K08235	1e-131	467	pop:POPTR_768438	xyloglucan:xyloglucosyl transferase [EC:2.4.1.207]	GO:0006073//cellular glucan metabolic process	GO:0008810//cellulase activity;GO:0016762//xyloglucan:xyloglucosyl transferase activity	GO:0048046//apoplast;GO:0005618//cell wall	--
CL4030.Contig1_All	1148	40	667	1.59	28.3323	4.15535	Up	3.8046e-157	8.01088e-155	gi|449441125|ref|XP_004138334.1|	679.1	0	PREDICTED: COBRA-like protein 4-like, partial [Cucumis sativus] >gi|449529461|ref|XP_004171718.1| PREDICTED: COBRA-like protein 4-like, partial [Cucumis sativus]	gi|449529460|ref|XM_004171670.1|	1364	0	PREDICTED: Cucumis sativus COBRA-like protein 4-like (LOC101221756), partial mRNA	sp|Q9LFW3|COBL4_ARATH	620	4e-178	COBRA-like protein 4 OS=Arabidopsis thaliana GN=COBL4 PE=2 SV=2	--	--	--	--	--	--	--	--	--	--	GO:0010413//glucuronoxylan metabolic process;GO:0009834//secondary cell wall biogenesis;GO:0009808//lignin metabolic process;GO:0010089//xylem development;GO:0045492//xylan biosynthetic process;GO:0009830//cell wall modification involved in abscission	-	GO:0009531//secondary cell wall;GO:0005774//vacuolar membrane;GO:0031225//anchored to membrane;GO:0005886//plasma membrane	--
Unigene3980_All	1116	25	415	1.0222	18.1335	4.14891	Up	2.82788e-98	3.94904e-96	gi|449493701|ref|XP_004159419.1|	476.1	4e-133	PREDICTED: uncharacterized protein LOC101231385 [Cucumis sativus]	gi|449443288|ref|XM_004139364.1|	176	3e-41	PREDICTED: Cucumis sativus uncharacterized LOC101206131 (LOC101206131), mRNA	sp|Q41001|BCP_PEA	126	3e-29	Blue copper protein OS=Pisum sativum PE=2 SV=1	Rv3876	46.2	6e-07	COG0455	ATPases involved in chromosome partitioning	K01115	5e-12	48.5	vcn:VOLCADRAFT_99471	phospholipase D [EC:3.1.4.4]	-	-	-	--
Unigene25558_All	253	2	33	0.3607	6.3605	4.14027	Up	6.558e-09	9.20367e-08	--	--	--	--	--	--	--	--	--	--	--	--	--	--	--	--	--	--	--	--	--	--	-	-	-	--
CL6669.Contig2_All	210	2	33	0.4346	7.6629	4.14013	Up	6.558e-09	9.20176e-08	gi|449482568|ref|XP_004156327.1|	105.9	1e-22	PREDICTED: threonine dehydratase biosynthetic, chloroplastic-like [Cucumis sativus]	gi|449482567|ref|XM_004156279.1|	143	8e-32	PREDICTED: Cucumis sativus threonine dehydratase biosynthetic, chloroplastic-like (LOC101223540), mRNA	sp|Q9ZSS6|THD1_ARATH	95.1	8e-21	Threonine dehydratase biosynthetic, chloroplastic OS=Arabidopsis thaliana GN=OMR1 PE=1 SV=1	RSc0449	60.8	6e-10	COG1171	Threonine dehydratase	K01754	2e-22	102	gmx:100777200	threonine dehydratase [EC:4.3.1.19]	GO:0010498//proteasomal protein catabolic process;GO:0007010//cytoskeleton organization;GO:0006566//threonine metabolic process;GO:0009097//isoleucine biosynthetic process;GO:0006094//gluconeogenesis	GO:0004794//L-threonine ammonia-lyase activity;GO:0030170//pyridoxal phosphate binding	GO:0009507//chloroplast	--
Unigene31385_All	327	2	33	0.2791	4.9211	4.14013	Up	6.558e-09	9.19985e-08	gi|449448354|ref|XP_004141931.1|	137.1	7e-32	PREDICTED: methylesterase 10-like [Cucumis sativus] >gi|449532256|ref|XP_004173098.1| PREDICTED: methylesterase 10-like [Cucumis sativus]	gi|449532255|ref|XM_004173050.1|	200	6e-49	PREDICTED: Cucumis sativus methylesterase 10-like (LOC101231292), mRNA	sp|Q8S9K8|MES10_ARATH	74.7	1e-14	Methylesterase 10 OS=Arabidopsis thaliana GN=MES10 PE=2 SV=1	--	--	--	--	--	K08233	7e-11	63.5	ath:AT2G23610	polyneuridine-aldehyde esterase [EC:3.1.1.78]	-	GO:0080032//methyl jasmonate esterase activity	-	--
CL2626.Contig1_All	1564	132	2169	3.8514	67.6272	4.13415	Up	0	0	gi|449524116|ref|XP_004169069.1|	632.5	6e-180	PREDICTED: zeatin O-glucosyltransferase-like [Cucumis sativus]	gi|449522551|ref|XM_004168242.1|	135	2e-28	PREDICTED: Cucumis sativus zeatin O-glucosyltransferase-like (LOC101228218), mRNA	sp|Q9ZSK5|ZOG_PHALU	515	2e-146	Zeatin O-glucosyltransferase OS=Phaseolus lunatus GN=ZOG1 PE=2 SV=1	YPO2725	54.3	6e-07	COG3501	Uncharacterized protein conserved in bacteria	K13495	5e-157	552	rcu:RCOM_1099970	cis-zeatin O-glucosyltransferase [EC:2.4.1.215]	-	GO:0016758//transferase activity, transferring hexosyl groups	-	--
CL5086.Contig16_All	2584	47	772	0.83	14.5688	4.13363	Up	5.98798e-181	1.42508e-178	gi|343466175|gb|AEM42981.1|	154.8	6e-36	cycloartenol synthase [Siraitia grosvenorii]	gi|343466174|gb|HQ128566.1|	2510	0	Siraitia grosvenorii cycloartenol synthase mRNA, complete cds	sp|Q6BE25|CAS1_CUCPE	1281	0	Cycloartenol synthase OS=Cucurbita pepo GN=CPX PE=1 SV=1	YHR072w	416	1e-126	COG1657	Squalene cyclase	K01853	0	1122	vvi:100243389	cycloartenol synthase [EC:5.4.99.8]	GO:0008152//metabolic process	GO:0016866//intramolecular transferase activity	-	--
Unigene16507_All	697	62	1014	4.0592	70.9421	4.12737	Up	7.06902e-237	2.19169e-234	gi|449467789|ref|XP_004151605.1|	218.4	8e-56	PREDICTED: secologanin synthase-like, partial [Cucumis sativus]	gi|449529711|ref|XM_004171794.1|	95.6	6e-17	PREDICTED: Cucumis sativus secologanin synthase-like (LOC101225885), mRNA	sp|Q05047|C72A1_CATRO	172	2e-43	Secologanin synthase OS=Catharanthus roseus GN=CYP72A1 PE=2 SV=1	--	--	--	--	--	K15638	9e-41	164	ath:AT1G17060	cytochrome P450, family 72, subfamily C, polypeptide 1	-	-	-	--
Unigene24383_All	823	31	506	1.7189	29.9812	4.1245	Up	5.51218e-119	9.45591e-117	gi|31615437|pdb|1J1F|A	168.7	1e-40	Chain A, Crystal Structure Of The Rnase Mc1 Mutant N71t In Complex With 5&apos;-Gmp	--	--	--	--	sp|P23540|RNMC_MOMCH	163	1e-40	Ribonuclease MC OS=Momordica charantia PE=1 SV=1	AGc2097	49.7	6e-06	COG3719	Ribonuclease I	K01166	2e-29	127	pop:POPTR_820480	ribonuclease T2 [EC:3.1.27.1]	-	GO:0016787//hydrolase activity	-	--
Unigene5291_All	847	7	114	0.3771	6.5633	4.1214	Up	6.9334e-28	2.94916e-26	gi|449457105|ref|XP_004146289.1|	213.4	3e-54	PREDICTED: nigrin b-like [Cucumis sativus] >gi|449524188|ref|XP_004169105.1| PREDICTED: nigrin b-like [Cucumis sativus]	--	--	--	--	sp|P33183|NIGB_SAMNI	150	9e-37	Nigrin b OS=Sambucus nigra PE=1 SV=2	--	--	--	--	--	--	--	--	--	--	-	-	-	--
CL1635.Contig1_All	332	6	97	0.8247	14.2473	4.11068	Up	7.072e-24	2.61482e-22	gi|449527939|ref|XP_004170965.1|	157.9	4e-38	PREDICTED: zerumbone synthase-like, partial [Cucumis sativus]	gi|449527938|ref|XM_004170917.1|	170	6e-40	PREDICTED: Cucumis sativus zerumbone synthase-like (LOC101211514), partial mRNA	sp|Q94K41|SDR3B_ARATH	95.5	6e-21	Short-chain dehydrogenase reductase 3b OS=Arabidopsis thaliana GN=SDR3b PE=2 SV=1	XF1726	64.7	4e-11	COG1028	Dehydrogenases with different specificities (related to short-chain alcohol dehydrogenases)	K13070	2e-20	95.5	osa:4335093	momilactone-A synthase [EC:1.1.1.295]	GO:0055114//oxidation-reduction process	GO:0055041;GO:0000166//nucleotide binding	-	--
Unigene17992_All	932	39	630	1.9095	32.9627	4.10957	Up	2.3098e-147	4.51205e-145	gi|449469456|ref|XP_004152436.1|	455.7	5e-127	PREDICTED: zerumbone synthase-like [Cucumis sativus] >gi|449515981|ref|XP_004165026.1| PREDICTED: zerumbone synthase-like [Cucumis sativus]	gi|449469455|ref|XM_004152388.1|	313	2e-82	PREDICTED: Cucumis sativus zerumbone synthase-like (LOC101213476), mRNA >gi|449515980|ref|XM_004164978.1| PREDICTED: Cucumis sativus zerumbone synthase-like (LOC101231106), mRNA	sp|F1SWA0|ZERSY_ZINZE	272	2e-73	Zerumbone synthase OS=Zingiber zerumbet GN=ZSD1 PE=1 SV=1	CC0094	156	4e-38	COG1028	Dehydrogenases with different specificities (related to short-chain alcohol dehydrogenases)	K09841	3e-74	276	bdi:100827045	xanthoxin dehydrogenase [EC:1.1.1.288]	GO:0055114//oxidation-reduction process	GO:0047044//androstan-3-alpha,17-beta-diol dehydrogenase activity;GO:0000166//nucleotide binding	-	--
CL5894.Contig6_All	1541	1	16	0.0296	0.5063	4.09632	Up	8.41232e-05	0.000580184	gi|449452338|ref|XP_004143916.1|	902.9	0	PREDICTED: 4-coumarate--CoA ligase-like 10-like [Cucumis sativus] >gi|449495827|ref|XP_004159956.1| PREDICTED: 4-coumarate--CoA ligase-like 10-like [Cucumis sativus]	gi|449495826|ref|XM_004159908.1|	1398	0	PREDICTED: Cucumis sativus 4-coumarate--CoA ligase-like 10-like (LOC101225382), mRNA	sp|Q9SMT7|4CLLA_ARATH	765	0	4-coumarate--CoA ligase-like 10 OS=Arabidopsis thaliana GN=4CLL10 PE=2 SV=1	SPCC1827.03c	435	9e-122	COG0318	Acyl-CoA synthetases (AMP-forming)/AMP-acid ligases II	K01904	3e-56	218	gmx:100808944	4-coumarate--CoA ligase [EC:6.2.1.12]	GO:0015706//nitrate transport;GO:0010214//seed coat development;GO:0010167//response to nitrate;GO:0046482//para-aminobenzoic acid metabolic process;GO:0010030//positive regulation of seed germination;GO:0033611//oxalate catabolic process;GO:0046686//response to cadmium ion;GO:0050832//defense response to fungus	GO:0050203//oxalate-CoA ligase activity;GO:0008756//o-succinylbenzoate-CoA ligase activity;GO:0016208//AMP binding	GO:0005829//cytosol;GO:0005739//mitochondrion;GO:0009506//plasmodesma;GO:0009570//chloroplast stroma;GO:0048046//apoplast	--
Unigene22595_All	422	1	16	0.1081	1.8489	4.09623	Up	8.41232e-05	0.000580539	--	--	--	--	--	--	--	--	--	--	--	--	--	--	--	--	--	--	--	--	--	--	-	-	-	--
Unigene32234_All	343	1	16	0.133	2.2747	4.09618	Up	8.41232e-05	0.000580955	--	--	--	--	--	--	--	--	--	--	--	--	--	--	--	--	--	--	--	--	--	--	-	-	-	--
Unigene40171_All	233	1	16	0.1958	3.3486	4.09611	Up	8.41232e-05	0.000580362	--	--	--	--	--	--	--	--	--	--	--	--	--	--	--	--	--	--	--	--	--	--	-	-	-	--
Unigene31672_All	269	1	16	0.1696	2.9005	4.09609	Up	8.41232e-05	0.000580658	gi|449463689|ref|XP_004149564.1|	82.4	2e-15	PREDICTED: uncharacterized protein LOC101217459 [Cucumis sativus]	gi|449463688|ref|XM_004149516.1|	60	1e-06	PREDICTED: Cucumis sativus uncharacterized LOC101217459 (LOC101217459), mRNA	--	--	--	--	--	--	--	--	--	--	--	--	--	--	-	-	-	--
Unigene40065_All	226	1	16	0.2019	3.4523	4.09585	Up	8.41232e-05	0.000580243	--	--	--	--	--	--	--	--	--	--	--	--	--	--	--	--	--	--	--	--	--	--	-	-	-	--
Unigene25932_All	530	10	160	0.861	14.7212	4.09574	Up	1.93895e-38	1.1201e-36	gi|356552241|ref|XP_003544477.1|	61.2	9e-09	PREDICTED: uncharacterized protein LOC100790635 [Glycine max]	--	--	--	--	--	--	--	--	--	--	--	--	--	--	--	--	--	--	-	-	-	--
Unigene40270_All	246	1	16	0.1855	3.1716	4.09572	Up	8.41232e-05	0.000580777	--	--	--	--	--	--	--	--	--	--	--	--	--	--	--	--	--	--	--	--	--	--	-	-	-	--
Unigene39293_All	221	1	16	0.2065	3.5304	4.09562	Up	8.41232e-05	0.000580717	gi|449482795|ref|XP_004156406.1|	52	3e-06	PREDICTED: probable LRR receptor-like serine/threonine-protein kinase At3g47570-like [Cucumis sativus]	gi|449482794|ref|XM_004156358.1|	172	9e-41	PREDICTED: Cucumis sativus probable LRR receptor-like serine/threonine-protein kinase At3g47570-like (LOC101223995), mRNA	sp|C0LGQ9|Y4294_ARATH	71.6	1e-13	Probable LRR receptor-like serine/threonine-protein kinase At4g20940 OS=Arabidopsis thaliana GN=At4g20940 PE=1 SV=1	--	--	--	--	--	K13420	1e-11	66.2	sbi:SORBI_06g028760	LRR receptor-like serine/threonine-protein kinase FLS2 [EC:2.7.11.1]	GO:0016310//phosphorylation	GO:0016491//oxidoreductase activity;GO:0004672//protein kinase activity;GO:0000166//nucleotide binding	GO:0016020//membrane	--
Unigene22728_All	295	1	16	0.1547	2.6448	4.09561	Up	8.41232e-05	0.000580599	gi|147825155|emb|CAN75500.1|	65.5	2e-10	hypothetical protein VITISV_034155 [Vitis vinifera]	--	--	--	--	--	--	--	--	--	--	--	--	--	--	--	--	--	--	-	-	-	--
Unigene35647_All	235	1	16	0.1942	3.3201	4.09561	Up	8.41232e-05	0.000580836	--	--	--	--	--	--	--	--	--	--	--	--	--	--	--	--	--	--	--	--	--	--	-	-	-	--
Unigene39781_All	252	2	32	0.3622	6.1922	4.09559	Up	1.28324e-08	1.73779e-07	gi|356569971|ref|XP_003553167.1|	65.1	3e-10	PREDICTED: DEAD-box ATP-dependent RNA helicase 53-like [Glycine max]	--	--	--	--	sp|Q9LUW6|RH9_ARATH	65.1	9e-12	DEAD-box ATP-dependent RNA helicase 9 OS=Arabidopsis thaliana GN=RH9 PE=2 SV=1	XF0818	62.4	2e-10	COG2730	Endoglucanase	K12741	9e-08	53.1	mtr:MTR_3g082650	heterogeneous nuclear ribonucleoprotein A1/A3	GO:0009628//response to abiotic stimulus;GO:0006950//response to stress	GO:0003676//nucleic acid binding	-	--
Unigene6232_All	403	2	32	0.2265	3.8721	4.09553	Up	1.28324e-08	1.73744e-07	--	--	--	--	--	--	--	--	--	--	--	--	--	--	--	--	--	--	--	--	--	--	-	-	-	--
Unigene39448_All	242	1	16	0.1886	3.2241	4.09549	Up	8.41232e-05	0.000580895	gi|449499765|ref|XP_004160910.1|	169.9	1e-41	PREDICTED: LOW QUALITY PROTEIN: uncharacterized LOC101202906 [Cucumis sativus]	gi|449499764|ref|XM_004160862.1|	276	1e-71	PREDICTED: Cucumis sativus uncharacterized LOC101202906 (LOC101202906), mRNA	--	--	--	--	--	--	--	--	--	--	--	--	--	--	GO:0009058//biosynthetic process	GO:0016757//transferase activity, transferring glycosyl groups	-	--
Unigene39872_All	255	1	16	0.179	3.0597	4.09536	Up	8.41232e-05	0.000580421	--	--	--	--	--	--	--	--	--	--	--	--	--	--	--	--	--	--	--	--	--	--	-	-	-	--
Unigene37225_All	317	1	16	0.144	2.4613	4.09528	Up	8.41232e-05	0.000580302	gi|449501401|ref|XP_004161356.1|	216.9	8e-56	PREDICTED: LOW QUALITY PROTEIN: ribonuclease J-like [Cucumis sativus]	gi|449501400|ref|XM_004161308.1|	525	1e-147	PREDICTED: Cucumis sativus ribonuclease J-like (LOC101215740), mRNA	--	--	--	--	Cgl1924	88.2	3e-18	COG0595	Predicted hydrolase of the metallo-beta-lactamase superfamily	K07021	6e-39	156	olu:OSTLU_2719		-	GO:0016788//hydrolase activity, acting on ester bonds;GO:0046872//metal ion binding;GO:0003723//RNA binding;GO:0003677//DNA binding;GO:0003682//chromatin binding	GO:0009507//chloroplast	--
CL5894.Contig1_All	1750	1	16	0.0261	0.4458	4.09427	Up	8.41232e-05	0.00058048	gi|449452338|ref|XP_004143916.1|	114	8e-24	PREDICTED: 4-coumarate--CoA ligase-like 10-like [Cucumis sativus] >gi|449495827|ref|XP_004159956.1| PREDICTED: 4-coumarate--CoA ligase-like 10-like [Cucumis sativus]	gi|449495826|ref|XM_004159908.1|	914	0	PREDICTED: Cucumis sativus 4-coumarate--CoA ligase-like 10-like (LOC101225382), mRNA	sp|Q9SMT7|4CLLA_ARATH	531	4e-151	4-coumarate--CoA ligase-like 10 OS=Arabidopsis thaliana GN=4CLL10 PE=2 SV=1	SPCC1827.03c	320	5e-87	COG0318	Acyl-CoA synthetases (AMP-forming)/AMP-acid ligases II	K01904	2e-40	125	rcu:RCOM_0246200	4-coumarate--CoA ligase [EC:6.2.1.12]	GO:0046686//response to cadmium ion;GO:0008152//metabolic process	GO:0008756//o-succinylbenzoate-CoA ligase activity	GO:0048046//apoplast;GO:0009507//chloroplast	--
Unigene21376_All	600	2	31	0.1521	2.5195	4.05005	Up	2.507e-08	3.27368e-07	gi|449515985|ref|XP_004165028.1|	105.5	5e-22	PREDICTED: alcohol dehydrogenase-like 6-like [Cucumis sativus]	gi|449515984|ref|XM_004164980.1|	153	2e-34	PREDICTED: Cucumis sativus alcohol dehydrogenase-like 6-like (LOC101231544), mRNA	sp|Q8LEB2|ADHL6_ARATH	98.2	3e-21	Alcohol dehydrogenase-like 6 OS=Arabidopsis thaliana GN=At5g24760 PE=2 SV=2	SPBC1539.07c	60.5	2e-09	COG1062	Zn-dependent alcohol dehydrogenases, class III	K00001	3e-21	99.8	aly:ARALYDRAFT_489336	alcohol dehydrogenase [EC:1.1.1.1]	GO:0009611//response to wounding;GO:0009805//coumarin biosynthetic process;GO:0055114//oxidation-reduction process	GO:0016747//transferase activity, transferring acyl groups other than amino-acyl groups;GO:0016491//oxidoreductase activity;GO:0008270//zinc ion binding;GO:0000166//nucleotide binding	GO:0005737//cytoplasm	--
Unigene2875_All	286	2	31	0.3191	5.2856	4.04999	Up	2.507e-08	3.27305e-07	--	--	--	--	--	--	--	--	--	--	--	--	--	--	--	--	--	--	--	--	--	--	-	-	-	--
Unigene16182_All	397	2	31	0.2299	3.8078	4.04988	Up	2.507e-08	3.27431e-07	--	--	--	--	--	--	--	--	--	--	--	--	--	--	--	--	--	--	--	--	--	--	-	-	-	--
CL7500.Contig2_All	275	2	31	0.3319	5.497	4.04982	Up	2.507e-08	3.27494e-07	--	--	--	--	--	--	--	--	--	--	--	--	--	--	--	--	--	--	--	--	--	--	-	-	-	--
CL6097.Contig2_All	1851	337	5221	8.3081	137.545	4.04924	Up	0	0	gi|449441284|ref|XP_004138412.1|	1092	0	PREDICTED: laccase-12-like [Cucumis sativus] >gi|449531607|ref|XP_004172777.1| PREDICTED: laccase-12-like [Cucumis sativus]	gi|449531606|ref|XM_004172729.1|	1118	0	PREDICTED: Cucumis sativus laccase-12-like (LOC101228974), mRNA	sp|Q9SIY8|LAC5_ARATH	914	0	Laccase-5 OS=Arabidopsis thaliana GN=LAC5 PE=2 SV=1	SPAC1F7.08	148	3e-35	COG2132	Putative multicopper oxidases	K00423	8e-66	249	ppp:PHYPADRAFT_163787	L-ascorbate oxidase [EC:1.10.3.3]	GO:0046688//response to copper ion;GO:0046274//lignin catabolic process;GO:0055114//oxidation-reduction process	GO:0005507//copper ion binding;GO:0052716//hydroquinone:oxygen oxidoreductase activity;GO:0008447//L-ascorbate oxidase activity	GO:0048046//apoplast	--
Unigene21495_All	599	47	722	3.5806	58.7772	4.03698	Up	1.73836e-166	3.81474e-164	gi|449436481|ref|XP_004136021.1|	120.2	2e-26	PREDICTED: indole-3-acetic acid-induced protein ARG2-like [Cucumis sativus]	--	--	--	--	sp|P32292|ARG2_VIGRR	99.4	1e-21	Indole-3-acetic acid-induced protein ARG2 OS=Vigna radiata var. radiata GN=ARG2 PE=2 SV=1	--	--	--	--	--	--	--	--	--	--	GO:0031348//negative regulation of defense response;GO:0016036//cellular response to phosphate starvation;GO:0009611//response to wounding;GO:0019375//galactolipid biosynthetic process;GO:0009867//jasmonic acid mediated signaling pathway;GO:0009862//systemic acquired resistance, salicylic acid mediated signaling pathway;GO:0010363//regulation of plant-type hypersensitive response;GO:0042631//cell…	-	-	--
Unigene19457_All	332	3	46	0.4123	6.7564	4.03449	Up	8.345e-12	1.54571e-10	--	--	--	--	--	--	--	--	--	--	--	--	--	--	--	--	--	--	--	--	--	--	-	-	-	--
CL2714.Contig5_All	329	3	46	0.4161	6.8181	4.03437	Up	8.345e-12	1.54614e-10	--	--	--	--	--	--	--	--	--	--	--	--	--	--	--	--	--	--	--	--	--	--	-	-	-	--
Unigene30471_All	1093	171	2604	7.1393	116.177	4.0244	Up	0	0	gi|449450982|ref|XP_004143241.1|	386.7	3e-106	PREDICTED: fasciclin-like arabinogalactan protein 11-like [Cucumis sativus] >gi|449482503|ref|XP_004156302.1| PREDICTED: fasciclin-like arabinogalactan protein 11-like [Cucumis sativus]	gi|449482502|ref|XM_004156254.1|	357	2e-95	PREDICTED: Cucumis sativus fasciclin-like arabinogalactan protein 11-like (LOC101214404), mRNA	sp|Q8LEJ6|FLA11_ARATH	268	4e-72	Fasciclin-like arabinogalactan protein 11 OS=Arabidopsis thaliana GN=FLA11 PE=2 SV=2	all5264	63.2	8e-10	COG2335	Secreted and surface protein containing fasciclin-like repeats	K11323	2e-06	51.6	vcn:VOLCADRAFT_121342	histone arginine demethylase JMJD6 [EC:1.14.11.-]	GO:0009834//secondary cell wall biogenesis	-	GO:0031225//anchored to membrane;GO:0005886//plasma membrane	--
CL132.Contig3_All	3277	104	1557	1.4482	23.1692	3.99988	Up	0	0	gi|449470291|ref|XP_004152851.1|	1948.7	0	PREDICTED: cellulose synthase A catalytic subunit 7 [UDP-forming]-like [Cucumis sativus] >gi|449507532|ref|XP_004163057.1| PREDICTED: LOW QUALITY PROTEIN: cellulose synthase A catalytic subunit 7 [UDP-forming]-like [Cucumis sativus]	gi|449470290|ref|XM_004152803.1|	4157	0	PREDICTED: Cucumis sativus cellulose synthase A catalytic subunit 7 [UDP-forming]-like (LOC101214842), mRNA >gi|449507531|ref|XM_004163009.1| PREDICTED: Cucumis sativus cellulose synthase A catalytic subunit 7 [UDP-forming]-like (LOC101214842), mRNA	sp|Q9SWW6|CESA7_ARATH	1760	0	Cellulose synthase A catalytic subunit 7 [UDP-forming] OS=Arabidopsis thaliana GN=CESA7 PE=1 SV=1	alr3757	99.8	3e-20	COG1215	Glycosyltransferases, probably involved in cell wall biogenesis	K10999	0	1842	gmx:100815436	cellulose synthase A [EC:2.4.1.12]	GO:0030244//cellulose biosynthetic process	GO:0016760//cellulose synthase (UDP-forming) activity;GO:0008270//zinc ion binding	GO:0016021//integral to membrane	--
Unigene18375_All	851	9	134	0.4826	7.6785	3.99192	Up	7.67252e-32	3.69884e-30	gi|449445353|ref|XP_004140437.1|	303.5	2e-81	PREDICTED: uncharacterized protein At1g66480-like [Cucumis sativus]	gi|449500786|ref|XM_004161146.1|	163	4e-37	PREDICTED: Cucumis sativus uncharacterized LOC101231317 (LOC101231317), mRNA	sp|Q6NLC8|Y1648_ARATH	156	2e-38	Uncharacterized protein At1g66480 OS=Arabidopsis thaliana GN=At1g66480 PE=1 SV=1	--	--	--	--	--	K01051	1e-06	50.8	gmx:100776781	pectinesterase [EC:3.1.1.11]	-	-	-	--
CL4971.Contig2_All	870	9	134	0.4721	7.5108	3.9918	Up	7.67252e-32	3.69621e-30	gi|449435918|ref|XP_004135741.1|	426.8	2e-118	PREDICTED: reticuline oxidase-like protein-like [Cucumis sativus]	gi|449488551|ref|XM_004158035.1|	341	7e-91	PREDICTED: Cucumis sativus reticuline oxidase-like protein-like (LOC101223317), mRNA	sp|A6P6V9|CBDAS_CANSA	262	2e-70	Cannabidiolic acid synthase OS=Cannabis sativa GN=CBDAS PE=1 SV=1	BS_ygaK	68.9	1e-11	COG0277	FAD/FMN-containing dehydrogenases	--	--	--	--	--	-	GO:0016614//oxidoreductase activity, acting on CH-OH group of donors	-	--
Unigene25454_All	363	3	44	0.3771	5.9108	3.97033	Up	3.15934e-11	5.58558e-10	gi|356574315|ref|XP_003555294.1|	144.1	6e-34	PREDICTED: LOW QUALITY PROTEIN: probable beta-D-xylosidase 5-like [Glycine max]	--	--	--	--	sp|Q9LJN4|BXL5_ARATH	128	9e-31	Probable beta-D-xylosidase 5 OS=Arabidopsis thaliana GN=BXL5 PE=2 SV=2	--	--	--	--	--	K15920	8e-15	76.6	pop:POPTR_799561	beta-D-xylosidase 4 [EC:3.2.1.37]	GO:0005975//carbohydrate metabolic process	GO:0004553//hydrolase activity, hydrolyzing O-glycosyl compounds	-	--
CL4661.Contig6_All	1594	143	2084	4.0938	63.7541	3.96101	Up	0	0	gi|449494529|ref|XP_004159571.1|	828.2	0	PREDICTED: squalene monooxygenase-like [Cucumis sativus]	gi|449494528|ref|XM_004159523.1|	1421	0	PREDICTED: Cucumis sativus squalene monooxygenase-like (LOC101227963), mRNA	sp|O48651|ERG1_PANGI	756	0	Squalene monooxygenase OS=Panax ginseng PE=2 SV=1	SPBC713.12	284	3e-76	COG0654	2-polyprenyl-6-methoxyphenol hydroxylase and related FAD-dependent oxidoreductases	K00511	0	796	gmx:100804406	squalene monooxygenase [EC:1.14.13.132]	GO:0009414//response to water deprivation;GO:0055114//oxidation-reduction process	GO:0050660//flavin adenine dinucleotide binding;GO:0004506//squalene monooxygenase activity	GO:0016021//integral to membrane	--
CL4900.Contig3_All	756	2	29	0.1207	1.8706	3.954	Up	9.51948e-08	1.15224e-06	gi|449454636|ref|XP_004145060.1|	346.3	3e-94	PREDICTED: uncharacterized protein LOC101221074 [Cucumis sativus] >gi|449472979|ref|XP_004153749.1| PREDICTED: uncharacterized protein LOC101211056 [Cucumis sativus]	gi|449498985|ref|XM_004160641.1|	722	0	PREDICTED: Cucumis sativus uncharacterized LOC101227119 (LOC101227119), mRNA	--	--	--	--	all1003	86.3	5e-17	COG4446	Uncharacterized protein conserved in bacteria	--	--	--	--	--	-	-	-	--
Unigene21662_All	1061	9	130	0.3871	5.9748	3.94811	Up	1.08434e-30	5.01984e-29	gi|449500849|ref|XP_004161210.1|	582	5e-165	PREDICTED: DUF246 domain-containing protein At1g04910-like [Cucumis sativus]	gi|449500848|ref|XM_004161162.1|	1239	0	PREDICTED: Cucumis sativus DUF246 domain-containing protein At1g04910-like (LOC101208265), mRNA	sp|Q8W486|Y1491_ARATH	88.6	6e-18	Uncharacterized protein At1g04910 OS=Arabidopsis thaliana GN=At1g04910 PE=1 SV=1	--	--	--	--	--	--	--	--	--	--	-	-	-	--
CL7471.Contig1_All	884	133	1915	6.8656	105.637	3.94358	Up	0	0	gi|449467031|ref|XP_004151229.1|	344	1e-93	PREDICTED: germin-like protein subfamily 2 member 4-like [Cucumis sativus]	gi|449467030|ref|XM_004151181.1|	232	5e-58	PREDICTED: Cucumis sativus germin-like protein subfamily 2 member 4-like (LOC101207540), mRNA	sp|Q9M263|GL24_ARATH	286	8e-78	Germin-like protein subfamily 2 member 4 OS=Arabidopsis thaliana GN=GLP10 PE=2 SV=1	sll1358	54.3	3e-07	COG2140	Thermophilic glucose-6-phosphate isomerase and related metalloenzymes	--	--	--	--	--	GO:0045492//xylan biosynthetic process;GO:0010413//glucuronoxylan metabolic process;GO:0055114//oxidation-reduction process	GO:0045735//nutrient reservoir activity;GO:0030145//manganese ion binding;GO:0004784//superoxide dismutase activity	GO:0009505//plant-type cell wall;GO:0048046//apoplast	--
Unigene25266_All	408	3	43	0.3355	5.1393	3.93719	Up	6.13542e-11	1.0576e-09	--	--	--	--	--	--	--	--	--	--	--	--	--	--	--	--	--	--	--	--	--	--	-	-	-	--
Unigene15167_All	273	6	86	1.0029	15.3615	3.93707	Up	1.0622e-20	3.37216e-19	--	--	--	--	--	--	--	--	--	--	--	--	--	--	--	--	--	--	--	--	--	--	-	-	-	--
CL2424.Contig1_All	506	3	43	0.2706	4.144	3.93679	Up	6.13542e-11	1.05734e-09	--	--	--	--	--	--	--	--	--	--	--	--	--	--	--	--	--	--	--	--	--	--	-	-	-	--
CL1857.Contig4_All	1278	4	57	0.1428	2.1749	3.92888	Up	4.15626e-14	9.15339e-13	gi|449463304|ref|XP_004149374.1|	159.1	1e-37	PREDICTED: uncharacterized protein LOC101206169 [Cucumis sativus]	gi|449531349|ref|XM_004172601.1|	224	2e-55	PREDICTED: Cucumis sativus uncharacterized LOC101206169 (LOC101206169), mRNA	sp|Q8LFV1|Y4295_ARATH	53.1	3e-07	UPF0725 protein At4g29550 OS=Arabidopsis thaliana GN=At4g29550 PE=2 SV=1	--	--	--	--	--	--	--	--	--	--	GO:0045892//negative regulation of transcription, DNA-dependent	-	GO:0005739//mitochondrion;GO:0009536//plastid	--
Unigene24810_All	420	4	57	0.4346	6.618	3.92864	Up	4.15626e-14	9.15637e-13	gi|449534365|ref|XP_004174133.1|	156.8	9e-38	PREDICTED: adenylate isopentenyltransferase-like [Cucumis sativus]	gi|449534364|ref|XM_004174085.1|	222	2e-55	PREDICTED: Cucumis sativus adenylate isopentenyltransferase-like (LOC101209073), mRNA	sp|Q5GHF7|IPT_HUMLU	128	1e-30	Adenylate isopentenyltransferase OS=Humulus lupulus PE=1 SV=1	--	--	--	--	--	K10760	2e-25	112	pop:POPTR_564538	adenylate isopentenyltransferase (cytokinin synthase)	GO:0071704;GO:0006725//cellular aromatic compound metabolic process;GO:0046483//heterocycle metabolic process;GO:0006807//nitrogen compound metabolic process	GO:0016765//transferase activity, transferring alkyl or aryl (other than methyl) groups	-	--
CL3220.Contig1_All	1810	47	668	1.1849	17.9968	3.9249	Up	5.71348e-151	1.15619e-148	gi|343466179|gb|AEM42983.1|	969.1	0	cytochrome P450 [Siraitia grosvenorii]	gi|343466178|gb|HQ128568.1|	3364	0	Siraitia grosvenorii cytochrome P450 (P450-2) mRNA, complete cds	sp|Q7XU38|C87A3_ORYSJ	448	4e-126	Cytochrome P450 87A3 OS=Oryza sativa subsp. japonica GN=CYP87A3 PE=2 SV=3	slr0574	157	6e-38	COG2124	Cytochrome P450	K00030	2e-147	520	vvi:100242228	isocitrate dehydrogenase (NAD+) [EC:1.1.1.41]	-	GO:0046872//metal ion binding;GO:0016491//oxidoreductase activity	-	--
Unigene17381_All	405	13	184	1.4648	22.1545	3.91882	Up	1.2248e-42	7.6509e-41	gi|449470160|ref|XP_004152786.1|	163.3	1e-39	PREDICTED: probable galacturonosyltransferase-like 1-like [Cucumis sativus] >gi|449496138|ref|XP_004160051.1| PREDICTED: probable galacturonosyltransferase-like 1-like [Cucumis sativus]	gi|449470159|ref|XM_004152738.1|	168	3e-39	PREDICTED: Cucumis sativus probable galacturonosyltransferase-like 1-like (LOC101218422), mRNA >gi|449496137|ref|XM_004160003.1| PREDICTED: Cucumis sativus probable galacturonosyltransferase-like 1-like (LOC101228696), mRNA	sp|Q9LN68|GATL1_ARATH	135	1e-32	Probable galacturonosyltransferase-like 1 OS=Arabidopsis thaliana GN=GATL1 PE=2 SV=1	--	--	--	--	--	K01115	6e-09	57.4	vcn:VOLCADRAFT_99471	phospholipase D [EC:3.1.4.4]	GO:0009867//jasmonic acid mediated signaling pathway;GO:0010363//regulation of plant-type hypersensitive response;GO:0032504//multicellular organism reproduction;GO:0006612//protein targeting to membrane;GO:0010051//xylem and phloem pattern formation;GO:0006569//tryptophan catabolic process;GO:0010417//glucuronoxylan biosynthetic process;GO:0009684//indoleacetic acid biosynthetic process;GO:00193…	GO:0047262//polygalacturonate 4-alpha-galacturonosyltransferase activity	GO:0005783//endoplasmic reticulum	--
CL4414.Contig1_All	1453	32	449	1.005	15.0688	3.9063	Up	1.19188e-101	1.71399e-99	gi|449446903|ref|XP_004141210.1|	644.8	0	PREDICTED: serine/threonine-protein kinase PBS1-like [Cucumis sativus] >gi|449489613|ref|XP_004158364.1| PREDICTED: serine/threonine-protein kinase PBS1-like [Cucumis sativus]	gi|449446902|ref|XM_004141162.1|	900	0	PREDICTED: Cucumis sativus serine/threonine-protein kinase PBS1-like (LOC101223038), mRNA >gi|449489612|ref|XM_004158316.1| PREDICTED: Cucumis sativus serine/threonine-protein kinase PBS1-like (LOC101232099), mRNA	sp|Q9FE20|PBS1_ARATH	276	2e-74	Serine/threonine-protein kinase PBS1 OS=Arabidopsis thaliana GN=PBS1 PE=1 SV=1	Cgl2127_1	103	8e-22	COG0515	Serine/threonine protein kinase	K13430	3e-78	290	osa:4329463	serine/threonine-protein kinase PBS1 [EC:2.7.11.1]	GO:0045492//xylan biosynthetic process;GO:0000186//activation of MAPKK activity;GO:0016926//protein desumoylation;GO:0050665//hydrogen peroxide biosynthetic process;GO:0010228//vegetative to reproductive phase transition of meristem;GO:0010413//glucuronoxylan metabolic process	GO:0004713//protein tyrosine kinase activity;GO:0004709//MAP kinase kinase kinase activity;GO:0005524//ATP binding	GO:0005886//plasma membrane	--
Unigene1898_All	268	2	28	0.3405	5.0947	3.90327	Up	1.84984e-07	2.1501e-06	--	--	--	--	--	--	--	--	--	--	--	--	--	--	--	--	--	--	--	--	--	--	-	-	-	--
Unigene12658_All	296	2	28	0.3083	4.6128	3.90324	Up	1.84984e-07	2.14937e-06	gi|449452739|ref|XP_004144116.1|	199.5	1e-50	PREDICTED: uncharacterized protein LOC101207749 [Cucumis sativus] >gi|449489955|ref|XP_004158468.1| PREDICTED: uncharacterized LOC101207749 [Cucumis sativus]	gi|449489954|ref|XM_004158420.1|	236	1e-59	PREDICTED: Cucumis sativus uncharacterized LOC101207749 (LOC101207749), mRNA	--	--	--	--	--	--	--	--	--	--	--	--	--	--	GO:0010200//response to chitin;GO:0010197//polar nucleus fusion;GO:0071577//zinc ion transmembrane transport	GO:0005385//zinc ion transmembrane transporter activity	-	--
CL1046.Contig3_All	1315	2	28	0.0694	1.0383	3.90314	Up	1.84984e-07	2.14973e-06	gi|449523035|ref|XP_004168530.1|	53.1	1e-101	PREDICTED: LOW QUALITY PROTEIN: linoleate 13S-lipoxygenase 2-1, chloroplastic-like [Cucumis sativus]	gi|449448963|ref|XM_004142187.1|	149	9e-33	PREDICTED: Cucumis sativus linoleate 13S-lipoxygenase 2-1, chloroplastic-like (LOC101214639), mRNA	sp|O24370|LOX21_SOLTU	261	8e-70	Linoleate 13S-lipoxygenase 2-1, chloroplastic OS=Solanum tuberosum GN=LOX2.1 PE=1 SV=1	--	--	--	--	--	K00454	1e-84	299	rcu:RCOM_1576890	lipoxygenase [EC:1.13.11.12]	GO:0072330	GO:0016491//oxidoreductase activity	GO:0009507//chloroplast	--
Unigene2252_All	255	2	28	0.3579	5.3545	3.90312	Up	1.84984e-07	2.149e-06	--	--	--	--	--	--	--	--	--	--	--	--	--	--	--	--	--	--	--	--	--	--	-	-	-	--
Unigene22456_All	253	3	42	0.5411	8.0952	3.9031	Up	1.18988e-10	1.99561e-09	--	--	--	--	--	--	--	--	--	--	--	--	--	--	--	--	--	--	--	--	--	--	-	-	-	--
Unigene31788_All	596	4	56	0.3063	4.5818	3.9029	Up	8.05206e-14	1.73156e-12	gi|225455840|ref|XP_002273330.1|	156	3e-37	PREDICTED: uncharacterized protein LOC100261105 [Vitis vinifera]	gi|449477475|ref|XM_004154986.1|	161	1e-36	PREDICTED: Cucumis sativus general transcription factor IIE subunit 1-like (LOC101214868), mRNA	--	--	--	--	--	--	--	--	--	--	--	--	--	--	-	-	-	--
Unigene20262_All	1101	15368	214592	636.956	9504.4	3.89933	Up	0	0	gi|343466205|gb|AEM42996.1|	495.7	5e-139	S-RNase [Siraitia grosvenorii]	gi|343466204|gb|HQ141616.1|	1855	0	Siraitia grosvenorii S-RNase mRNA, complete cds	sp|P23540|RNMC_MOMCH	132	5e-31	Ribonuclease MC OS=Momordica charantia PE=1 SV=1	AGc2097	51.2	3e-06	COG3719	Ribonuclease I	K01166	8e-31	132	rcu:RCOM_0836480	ribonuclease T2 [EC:3.1.27.1]	-	-	-	--
CL6910.Contig2_All	713	31	430	1.984	29.4088	3.88976	Up	4.19556e-97	5.79905e-95	gi|449464068|ref|XP_004149751.1|	267.3	1e-70	PREDICTED: probable WRKY transcription factor 41-like [Cucumis sativus]	gi|449464067|ref|XM_004149703.1|	737	0	PREDICTED: Cucumis sativus probable WRKY transcription factor 41-like (LOC101204004), mRNA	sp|Q9SUP6|WRK53_ARATH	117	5e-27	Probable WRKY transcription factor 53 OS=Arabidopsis thaliana GN=WRKY53 PE=1 SV=1	--	--	--	--	--	--	--	--	--	--	-	-	-	--
CL4971.Contig1_All	1374	14	191	0.465	6.7787	3.86571	Up	9.17468e-44	5.89456e-42	gi|449435918|ref|XP_004135741.1|	334.7	2e-90	PREDICTED: reticuline oxidase-like protein-like [Cucumis sativus]	gi|449532634|ref|XM_004173238.1|	168	1e-38	PREDICTED: Cucumis sativus reticuline oxidase-like protein-like (LOC101218888), mRNA	sp|A6P6V9|CBDAS_CANSA	219	2e-57	Cannabidiolic acid synthase OS=Cannabis sativa GN=CBDAS PE=1 SV=1	YPO0308_1	67.8	4e-11	COG0277	FAD/FMN-containing dehydrogenases	--	--	--	--	--	-	GO:0016491//oxidoreductase activity	-	--
CL5367.Contig1_All	878	5	68	0.2599	3.7767	3.8611	Up	2.09678e-16	5.3158e-15	gi|449482795|ref|XP_004156406.1|	439.9	2e-122	PREDICTED: probable LRR receptor-like serine/threonine-protein kinase At3g47570-like [Cucumis sativus]	gi|449482794|ref|XM_004156358.1|	204	1e-49	PREDICTED: Cucumis sativus probable LRR receptor-like serine/threonine-protein kinase At3g47570-like (LOC101223995), mRNA	sp|C0LGP4|Y3475_ARATH	256	2e-68	Probable LRR receptor-like serine/threonine-protein kinase At3g47570 OS=Arabidopsis thaliana GN=At3g47570 PE=1 SV=1	YAR019c	71.2	2e-12	COG0515	Serine/threonine protein kinase	K13428	7e-61	232	aly:ARALYDRAFT_488953	LRR receptor-like serine/threonine-protein kinase EFR [EC:2.7.11.1]	GO:0051716//cellular response to stimulus;GO:0006955//immune response;GO:0016310//phosphorylation;GO:0006464//cellular protein modification process;GO:0050794//regulation of cellular process;GO:0006952//defense response	GO:0000166//nucleotide binding;GO:0004672//protein kinase activity;GO:0016491//oxidoreductase activity	GO:0016020//membrane;GO:0044464//cell part	--
Unigene18413_All	468	2	27	0.195	2.8133	3.85072	Up	3.58738e-07	3.98533e-06	--	--	--	--	--	--	--	--	--	--	--	--	--	--	--	--	--	--	--	--	--	--	-	-	-	--
Unigene15603_All	260	2	27	0.351	5.0639	3.85071	Up	3.58738e-07	3.98467e-06	--	--	--	--	gi|449532678|ref|XM_004173260.1|	89.7	1e-15	PREDICTED: Cucumis sativus uncharacterized LOC101226713 (LOC101226713), mRNA	--	--	--	--	--	--	--	--	--	--	--	--	--	--	-	-	-	--
Unigene22741_All	260	2	27	0.351	5.0639	3.85071	Up	3.58738e-07	3.98402e-06	gi|449434474|ref|XP_004135021.1|	65.9	2e-10	PREDICTED: protein MID1-COMPLEMENTING ACTIVITY 1-like [Cucumis sativus] >gi|449491454|ref|XP_004158901.1| PREDICTED: protein MID1-COMPLEMENTING ACTIVITY 1-like [Cucumis sativus]	gi|449434473|ref|XM_004134973.1|	143	1e-31	PREDICTED: Cucumis sativus protein MID1-COMPLEMENTING ACTIVITY 1-like (LOC101221115), mRNA >gi|449491453|ref|XM_004158853.1| PREDICTED: Cucumis sativus protein MID1-COMPLEMENTING ACTIVITY 1-like (LOC101224622), mRNA	sp|Q3EBY6|MCAC2_ARATH	53.9	2e-08	Protein MID1-COMPLEMENTING ACTIVITY 2 OS=Arabidopsis thaliana GN=MCA2 PE=2 SV=1	--	--	--	--	--	--	--	--	--	--	GO:0070509//calcium ion import;GO:0007638//mechanosensory behavior;GO:0048528//post-embryonic root development	-	GO:0005737//cytoplasm;GO:0005887//integral to plasma membrane;GO:0005634//nucleus	--
Unigene5349_All	264	6	81	1.0371	14.9617	3.85065	Up	2.87204e-19	8.49905e-18	--	--	--	--	--	--	--	--	--	--	--	--	--	--	--	--	--	--	--	--	--	--	-	-	-	--
Unigene2220_All	471	3	40	0.2907	4.1413	3.83248	Up	4.45606e-10	7.10667e-09	--	--	--	--	--	--	--	--	--	--	--	--	--	--	--	--	--	--	--	--	--	--	-	-	-	--
Unigene2206_All	638	4	53	0.2861	4.0509	3.82365	Up	5.8158e-13	1.1776e-11	gi|449527422|ref|XP_004170710.1|	288.5	5e-77	PREDICTED: transcriptional activator Myb-like [Cucumis sativus]	gi|449527421|ref|XM_004170662.1|	343	1e-91	PREDICTED: Cucumis sativus transcription factor MYB44-like (LOC101210851), mRNA	sp|Q9FDW1|MYB44_ARATH	130	5e-31	Transcription factor MYB44 OS=Arabidopsis thaliana GN=MYB44 PE=2 SV=1	ECU11g1690	122	6e-28	COG5147	Myb superfamily proteins, including transcription factors and mRNA splicing factors	K09422	1e-54	210	ppp:PHYPADRAFT_131930	myb proto-oncogene protein, plant	-	GO:0003677//DNA binding;GO:0003682//chromatin binding	-	--
Unigene30273_All	1589	31	408	0.8903	12.5209	3.8139	Up	7.75586e-91	9.96599e-89	gi|449440522|ref|XP_004138033.1|	754.6	0	PREDICTED: omega-hydroxypalmitate O-feruloyl transferase-like [Cucumis sativus]	gi|449440521|ref|XM_004137985.1|	922	0	PREDICTED: Cucumis sativus omega-hydroxypalmitate O-feruloyl transferase-like (LOC101210256), mRNA	sp|Q94CD1|HHT1_ARATH	635	0	Omega-hydroxypalmitate O-feruloyl transferase OS=Arabidopsis thaliana GN=HHT1 PE=1 SV=1	--	--	--	--	--	K15400	0	706	vvi:100245819	omega-hydroxypalmitate O-feruloyl transferase [EC:2.3.1.188]	GO:0015706//nitrate transport;GO:0010345//suberin biosynthetic process;GO:0010167//response to nitrate;GO:0052325//cell wall pectin biosynthetic process	GO:0050734//hydroxycinnamoyltransferase activity;GO:0047672	GO:0005737//cytoplasm	--
CL4045.Contig1_All	1423	3	39	0.0962	1.3365	3.79628	Up	8.60364e-10	1.33497e-08	gi|449449982|ref|XP_004142743.1|	672.2	0	PREDICTED: UDP-glucuronic acid decarboxylase 1-like [Cucumis sativus] >gi|449483862|ref|XP_004156715.1| PREDICTED: UDP-glucuronic acid decarboxylase 1-like [Cucumis sativus]	gi|449523903|ref|XM_004168915.1|	1189	0	PREDICTED: Cucumis sativus UDP-glucuronic acid decarboxylase 1-like (LOC101219906), mRNA	sp|Q9LPG6|RHM2_ARATH	111	9e-25	Probable rhamnose biosynthetic enzyme 2 OS=Arabidopsis thaliana GN=RHM2 PE=1 SV=1	alr0657	446	4e-125	COG0451	Nucleoside-diphosphate-sugar epimerases	K01710	1e-119	428	cme:CME136C	dTDP-glucose 4,6-dehydratase [EC:4.2.1.46]	GO:0042732//D-xylose metabolic process;GO:0009225//nucleotide-sugar metabolic process	GO:0048040//UDP-glucuronate decarboxylase activity;GO:0050662//coenzyme binding;GO:0000166//nucleotide binding	GO:0005886//plasma membrane	--
Unigene31739_All	434	8	104	0.8412	11.6854	3.79611	Up	3.98478e-24	1.488e-22	--	--	--	--	--	--	--	--	--	--	--	--	--	--	--	--	--	--	--	--	--	--	-	-	-	--
Unigene15739_All	366	2	26	0.2494	3.4641	3.79595	Up	6.94208e-07	7.31196e-06	gi|449461749|ref|XP_004148604.1|	206.1	1e-52	PREDICTED: solute carrier family 40 member 2-like [Cucumis sativus]	gi|449461748|ref|XM_004148556.1|	321	3e-85	PREDICTED: Cucumis sativus solute carrier family 40 member 2-like (LOC101209963), mRNA	sp|O80905|S40A1_ARATH	132	6e-32	Solute carrier family 40 member 1 OS=Arabidopsis thaliana GN=IREG1 PE=3 SV=1	--	--	--	--	--	K14685	2e-41	165	rcu:RCOM_0849950	solute carrier family 40 (iron-regulated transporter), member 1	GO:0015706//nitrate transport;GO:0015675//nickel cation transport;GO:0006824//cobalt ion transport;GO:0034755//iron ion transmembrane transport;GO:0010106//cellular response to iron ion starvation;GO:0055068//cobalt ion homeostasis;GO:0010167//response to nitrate	GO:0005381//iron ion transmembrane transporter activity;GO:0015099//nickel cation transmembrane transporter activity;GO:0015087//cobalt ion transmembrane transporter activity	GO:0016021//integral to membrane;GO:0009705//plant-type vacuole membrane;GO:0005886//plasma membrane	--
CL7471.Contig2_All	1264	106	1364	3.8268	52.6218	3.78145	Up	1.11972e-297	4.5867e-295	gi|449467031|ref|XP_004151229.1|	293.9	4e-78	PREDICTED: germin-like protein subfamily 2 member 4-like [Cucumis sativus]	gi|449467030|ref|XM_004151181.1|	208	1e-50	PREDICTED: Cucumis sativus germin-like protein subfamily 2 member 4-like (LOC101207540), mRNA	sp|Q9M263|GL24_ARATH	266	2e-71	Germin-like protein subfamily 2 member 4 OS=Arabidopsis thaliana GN=GLP10 PE=2 SV=1	sll1358	54.3	4e-07	COG2140	Thermophilic glucose-6-phosphate isomerase and related metalloenzymes	--	--	--	--	--	GO:0045492//xylan biosynthetic process;GO:0010413//glucuronoxylan metabolic process;GO:0055114//oxidation-reduction process	GO:0045735//nutrient reservoir activity;GO:0030145//manganese ion binding;GO:0004784//superoxide dismutase activity	GO:0009505//plant-type cell wall;GO:0048046//apoplast	--
Unigene28526_All	325	17	218	2.387	32.7093	3.77643	Up	7.16694e-49	5.14232e-47	gi|388511845|gb|AFK43984.1|	126.3	1e-28	unknown [Lotus japonicus]	gi|343887266|dbj|AB573149.1|	113	1e-22	Citrus unshiu genomic DNA, polyembryony locus, cultivar: Miyagawa wase	sp|O82013|HSP21_SOLPE	124	1e-29	17.3 kDa class II heat shock protein OS=Solanum peruvianum PE=2 SV=1	TM0374	49.7	1e-06	COG0071	Molecular chaperone (small heat shock protein)	K13993	1e-29	125	rcu:RCOM_0706490	HSP20 family protein	-	-	-	--
Unigene15676_All	600	9	115	0.6845	9.3464	3.77129	Up	2.0755e-26	8.41518e-25	gi|449433004|ref|XP_004134288.1|	368.6	3e-101	PREDICTED: metalloendoproteinase 1-like [Cucumis sativus] >gi|449478237|ref|XP_004155259.1| PREDICTED: metalloendoproteinase 1-like [Cucumis sativus]	gi|449433003|ref|XM_004134240.1|	551	1e-154	PREDICTED: Cucumis sativus metalloendoproteinase 1-like (LOC101222921), mRNA >gi|449478236|ref|XM_004155211.1| PREDICTED: Cucumis sativus metalloendoproteinase 1-like (LOC101222921), mRNA	sp|P29136|MEP1_SOYBN	155	1e-38	Metalloendoproteinase 1 OS=Glycine max PE=1 SV=2	--	--	--	--	--	K07761	3e-45	179	ath:AT1G59970	gelatinase A [EC:3.4.24.24]	GO:0006508//proteolysis	GO:0004222//metalloendopeptidase activity;GO:0008270//zinc ion binding	GO:0031225//anchored to membrane;GO:0005576//extracellular region;GO:0031012//extracellular matrix	--
Unigene32261_All	301	4	51	0.6064	8.2623	3.7682	Up	2.16016e-12	4.19428e-11	gi|449440447|ref|XP_004137996.1|	180.3	8e-45	PREDICTED: leucoanthocyanidin dioxygenase-like [Cucumis sativus] >gi|449524760|ref|XP_004169389.1| PREDICTED: leucoanthocyanidin dioxygenase-like [Cucumis sativus]	gi|449440446|ref|XM_004137948.1|	131	4e-28	PREDICTED: Cucumis sativus leucoanthocyanidin dioxygenase-like (LOC101220578), mRNA >gi|449524759|ref|XM_004169341.1| PREDICTED: Cucumis sativus leucoanthocyanidin dioxygenase-like (LOC101220578), mRNA	sp|P51091|LDOX_MALDO	69.7	4e-13	Leucoanthocyanidin dioxygenase OS=Malus domestica GN=ANS PE=2 SV=1	--	--	--	--	--	K06892	4e-17	84.3	pop:POPTR_550478		GO:0051555//flavonol biosynthetic process;GO:0055114//oxidation-reduction process	GO:0045431//flavonol synthase activity;GO:0005506//iron ion binding;GO:0016702//oxidoreductase activity, acting on single donors with incorporation of molecular oxygen, incorporation of two atoms of oxygen	GO:0005737//cytoplasm	--
Unigene24137_All	240	8	102	1.5211	20.7247	3.76816	Up	1.47336e-23	5.37996e-22	--	--	--	--	--	--	--	--	--	--	--	--	--	--	--	--	--	--	--	--	--	--	-	-	-	--
Unigene15007_All	324	4	51	0.5634	7.6758	3.76809	Up	2.16016e-12	4.19308e-11	--	--	--	--	--	--	--	--	--	--	--	--	--	--	--	--	--	--	--	--	--	--	-	-	-	--
CL103.Contig2_All	537	68	866	5.7785	78.6398	3.76649	Up	4.68142e-189	1.1719e-186	gi|449482472|ref|XP_004156293.1|	263.1	1e-69	PREDICTED: LOW QUALITY PROTEIN: phenylalanine ammonia-lyase-like [Cucumis sativus]	gi|449482471|ref|XM_004156245.1|	464	1e-128	PREDICTED: Cucumis sativus phenylalanine ammonia-lyase-like (LOC101218144), mRNA	sp|P45724|PAL2_ARATH	239	7e-64	Phenylalanine ammonia-lyase 2 OS=Arabidopsis thaliana GN=PAL2 PE=1 SV=2	--	--	--	--	--	K10775	2e-63	239	ath:AT3G53260	phenylalanine ammonia-lyase [EC:4.3.1.24]	GO:0006979//response to oxidative stress;GO:0006952//defense response;GO:0006598//polyamine catabolic process;GO:0009805//coumarin biosynthetic process;GO:0009800//cinnamic acid biosynthetic process;GO:0009611//response to wounding;GO:0006559//L-phenylalanine catabolic process;GO:0009963//positive regulation of flavonoid biosynthetic process;GO:0042398//cellular modified amino acid biosynthetic p…	GO:0045548//phenylalanine ammonia-lyase activity	GO:0005829//cytosol	--
Unigene28199_All	1594	54	687	1.5459	21.0168	3.76502	Up	2.73358e-150	5.48249e-148	gi|449452733|ref|XP_004144113.1|	790	0	PREDICTED: cytokinin dehydrogenase 4-like [Cucumis sativus] >gi|449489951|ref|XP_004158467.1| PREDICTED: cytokinin dehydrogenase 4-like [Cucumis sativus]	gi|449489950|ref|XM_004158419.1|	579	1e-162	PREDICTED: Cucumis sativus cytokinin dehydrogenase 4-like (LOC101207014), mRNA	sp|Q9FUJ2|CKX4_ARATH	530	7e-151	Cytokinin dehydrogenase 4 OS=Arabidopsis thaliana GN=CKX4 PE=1 SV=2	all0324	144	3e-34	COG0277	FAD/FMN-containing dehydrogenases	K00279	2e-179	627	pop:POPTR_762685	cytokinin dehydrogenase [EC:1.5.99.12]	GO:0008152//metabolic process	GO:0016614//oxidoreductase activity, acting on CH-OH group of donors	GO:0043231//intracellular membrane-bounded organelle;GO:0044444//cytoplasmic part	--
CL7611.Contig2_All	334	3	38	0.4099	5.548	3.75862	Up	1.65848e-09	2.48768e-08	--	--	--	--	--	--	--	--	--	--	--	--	--	--	--	--	--	--	--	--	--	--	-	-	-	--
Unigene27945_All	328	3	38	0.4174	5.6495	3.75862	Up	1.65848e-09	2.48823e-08	--	--	--	--	--	--	--	--	--	--	--	--	--	--	--	--	--	--	--	--	--	--	-	-	-	--
CL8554.Contig1_All	244	5	63	0.9351	12.5907	3.75109	Up	5.57076e-15	1.29656e-13	--	--	--	--	--	--	--	--	--	--	--	--	--	--	--	--	--	--	--	--	--	--	-	-	-	--
CL5329.Contig2_All	1367	21	264	0.701	9.4175	3.74786	Up	1.59907e-58	1.35949e-56	gi|449434474|ref|XP_004135021.1|	703	0	PREDICTED: protein MID1-COMPLEMENTING ACTIVITY 1-like [Cucumis sativus] >gi|449491454|ref|XP_004158901.1| PREDICTED: protein MID1-COMPLEMENTING ACTIVITY 1-like [Cucumis sativus]	gi|449434473|ref|XM_004134973.1|	1316	0	PREDICTED: Cucumis sativus protein MID1-COMPLEMENTING ACTIVITY 1-like (LOC101221115), mRNA >gi|449491453|ref|XM_004158853.1| PREDICTED: Cucumis sativus protein MID1-COMPLEMENTING ACTIVITY 1-like (LOC101224622), mRNA	sp|Q8L7E9|MCAC1_ARATH	495	2e-140	Protein MID1-COMPLEMENTING ACTIVITY 1 OS=Arabidopsis thaliana GN=MCA1 PE=2 SV=1	--	--	--	--	--	--	--	--	--	--	GO:0006655//phosphatidylglycerol biosynthetic process;GO:0007638//mechanosensory behavior;GO:0070509//calcium ion import;GO:0007020//microtubule nucleation;GO:0019344//cysteine biosynthetic process;GO:0048528//post-embryonic root development;GO:0007231//osmosensory signaling pathway;GO:0033500//carbohydrate homeostasis	-	GO:0005887//integral to plasma membrane	--
Unigene7101_All	948	46	577	2.2143	29.6801	3.74457	Up	5.97158e-126	1.05382e-123	gi|449438879|ref|XP_004137215.1|	425.2	7e-118	PREDICTED: protein IQ-DOMAIN 1-like [Cucumis sativus]	gi|449438878|ref|XM_004137167.1|	882	0	PREDICTED: Cucumis sativus protein IQ-DOMAIN 1-like (LOC101206595), mRNA	sp|Q9SF32|IQD1_ARATH	99	4e-21	Protein IQ-DOMAIN 1 OS=Arabidopsis thaliana GN=IQD1 PE=1 SV=1	--	--	--	--	--	--	--	--	--	--	-	-	-	--
Unigene26020_All	1147	980	12283	38.989	522.203	3.74347	Up	0	0	gi|449487006|ref|XP_004157468.1|	328.6	1e-88	PREDICTED: glutathione S-transferase U9-like [Cucumis sativus]	gi|449487005|ref|XM_004157420.1|	293	2e-76	PREDICTED: Cucumis sativus glutathione S-transferase U9-like (LOC101203519), mRNA	sp|Q9FUT0|GSTU9_ARATH	249	2e-66	Glutathione S-transferase U9 OS=Arabidopsis thaliana GN=GSTU9 PE=2 SV=1	NMB1953	60.8	4e-09	COG0625	Glutathione S-transferase	K00799	1e-52	205	mtr:MTR_5g040430	glutathione S-transferase [EC:2.5.1.18]	GO:0009407//toxin catabolic process;GO:0010583//response to cyclopentenone	GO:0004364//glutathione transferase activity;GO:0016829//lyase activity	GO:0005737//cytoplasm;GO:0005634//nucleus	--
Unigene25146_All	236	2	25	0.3867	5.1657	3.73968	Up	1.3403e-06	1.34846e-05	--	--	--	--	--	--	--	--	--	--	--	--	--	--	--	--	--	--	--	--	--	--	-	-	-	--
Unigene28781_All	267	2	25	0.3418	4.5659	3.73967	Up	1.3403e-06	1.34806e-05	--	--	--	--	--	--	--	--	--	--	--	--	--	--	--	--	--	--	--	--	--	--	-	-	-	--
Unigene25151_All	301	2	25	0.3032	4.0502	3.73965	Up	1.3403e-06	1.34786e-05	--	--	--	--	gi|147822241|emb|AM477681.2|	60	1e-06	Vitis vinifera contig VV78X133645.21, whole genome shotgun sequence	--	--	--	--	--	--	--	--	--	--	--	--	--	--	-	-	-	--
Unigene21569_All	303	2	25	0.3012	4.0234	3.73962	Up	1.3403e-06	1.34826e-05	--	--	--	--	--	--	--	--	--	--	--	--	--	--	--	--	--	--	--	--	--	--	-	-	-	--
Unigene39229_All	284	2	25	0.3214	4.2926	3.73941	Up	1.3403e-06	1.34766e-05	gi|449503626|ref|XP_004162096.1|	103.2	1e-21	PREDICTED: linoleate 13S-lipoxygenase 2-1, chloroplastic-like [Cucumis sativus]	gi|449531845|ref|XM_004172848.1|	60	1e-06	PREDICTED: Cucumis sativus linoleate 13S-lipoxygenase 2-1, chloroplastic-like (LOC101214880), partial mRNA	sp|Q8GSM2|LOX23_HORVU	61.6	1e-10	Lipoxygenase 2.3, chloroplastic OS=Hordeum vulgare GN=LOX2.3 PE=1 SV=1	--	--	--	--	--	K00454	4e-14	74.3	gmx:100797626	lipoxygenase [EC:1.13.11.12]	GO:0044710	GO:0016491//oxidoreductase activity	GO:0009536//plastid	--
Unigene32254_All	328	12	149	1.6695	22.1519	3.72994	Up	1.55881e-33	7.88019e-32	gi|449443964|ref|XP_004139745.1|	142.5	1e-33	PREDICTED: extensin-3-like [Cucumis sativus]	gi|449443963|ref|XM_004139697.1|	170	6e-40	PREDICTED: Cucumis sativus extensin-3-like (LOC101212064), mRNA	sp|Q9FS16|EXTN3_ARATH	172	4e-44	Extensin-3 OS=Arabidopsis thaliana GN=EXT3 PE=2 SV=3	PA0197	64.7	4e-11	COG0810	Periplasmic protein TonB, links inner and outer membranes	K12199	5e-19	90.5	mtr:MTR_5g093880	vacuolar protein sorting-associated protein VTA1	GO:0043161//proteasomal ubiquitin-dependent protein catabolic process;GO:0043248//proteasome assembly;GO:0048767//root hair elongation;GO:0009735//response to cytokinin stimulus;GO:0051788//response to misfolded protein	GO:0005199//structural constituent of cell wall	-	--
Unigene15171_All	454	16	198	1.6082	21.2671	3.7251	Up	4.72908e-44	3.0587e-42	gi|242044100|ref|XP_002459921.1|	24.3	2e-07	hypothetical protein SORBIDRAFT_02g015861 [Sorghum bicolor] >gi|241923298|gb|EER96442.1| hypothetical protein SORBIDRAFT_02g015861 [Sorghum bicolor]	gi|259156800|gb|GQ856148.1|	333	9e-89	Cucurbita pepo mitochondrion, complete genome	--	--	--	--	--	--	--	--	--	--	--	--	--	--	-	-	-	--
CL1135.Contig5_All	1872	28	344	0.6825	8.9609	3.71474	Up	2.92588e-75	3.16919e-73	gi|449524018|ref|XP_004169020.1|	763.8	0	PREDICTED: LOW QUALITY PROTEIN: secologanin synthase-like [Cucumis sativus]	gi|449519738|ref|XM_004166844.1|	525	1e-146	PREDICTED: Cucumis sativus secologanin synthase-like (LOC101222756), mRNA	sp|Q05047|C72A1_CATRO	591	5e-169	Secologanin synthase OS=Catharanthus roseus GN=CYP72A1 PE=2 SV=1	AGc2890	165	3e-40	COG2124	Cytochrome P450	K15638	4e-128	456	ath:AT1G17060	cytochrome P450, family 72, subfamily C, polypeptide 1	-	GO:0046872//metal ion binding;GO:0016491//oxidoreductase activity	-	--
Unigene27701_All	664	51	626	3.5049	45.9732	3.71335	Up	1.37787e-135	2.52382e-133	--	--	--	--	--	--	--	--	--	--	--	--	--	--	--	--	--	--	--	--	--	--	-	-	-	--
CL2678.Contig3_All	1646	93	1141	2.5783	33.8029	3.71265	Up	1.1769e-245	3.73454e-243	gi|449469643|ref|XP_004152528.1|	610.9	2e-173	PREDICTED: BAHD acyltransferase At5g47980-like [Cucumis sativus]	gi|449515990|ref|XM_004164983.1|	196	5e-47	PREDICTED: Cucumis sativus BAHD acyltransferase At5g47980-like (LOC101216696), mRNA	sp|Q9FI40|BAHD1_ARATH	280	2e-75	BAHD acyltransferase At5g47980 OS=Arabidopsis thaliana GN=BAHD1 PE=2 SV=1	--	--	--	--	--	K13065	2e-26	119	sbi:SORBI_06g021640	shikimate O-hydroxycinnamoyltransferase [EC:2.3.1.133]	-	GO:0016746//transferase activity, transferring acyl groups	-	--
Unigene5356_All	405	16	195	1.8028	23.4789	3.70305	Up	3.31966e-43	2.10678e-41	gi|449433297|ref|XP_004134434.1|	206.8	8e-53	PREDICTED: leucine-rich repeat extensin-like protein 6-like [Cucumis sativus] >gi|449518721|ref|XP_004166385.1| PREDICTED: leucine-rich repeat extensin-like protein 6-like [Cucumis sativus]	gi|449433296|ref|XM_004134386.1|	232	2e-58	PREDICTED: Cucumis sativus leucine-rich repeat extensin-like protein 6-like (LOC101218509), mRNA >gi|449518720|ref|XM_004166337.1| PREDICTED: Cucumis sativus leucine-rich repeat extensin-like protein 6-like (LOC101230602), mRNA	sp|Q9LUI1|LRX6_ARATH	168	1e-42	Leucine-rich repeat extensin-like protein 6 OS=Arabidopsis thaliana GN=LRX6 PE=2 SV=1	YPO2725	47.8	1e-07	COG3501	Uncharacterized protein conserved in bacteria	K12418	5e-08	54.3	cre:CHLREDRAFT_32523	fatty acid desaturase (delta-4 desaturase) [EC:1.14.19.-]	GO:0016310//phosphorylation	GO:0016301//kinase activity;GO:0005199//structural constituent of cell wall	GO:0009506//plasmodesma	--
CL3943.Contig3_All	2367	608	7408	11.7215	152.616	3.70268	Up	0	0	gi|449453650|ref|XP_004144569.1|	1021.1	0	PREDICTED: 3-hydroxy-3-methylglutaryl-coenzyme A reductase 1-like [Cucumis sativus]	gi|343466154|gb|HQ128556.1|	1312	0	Siraitia grosvenorii HMG-CoA reductase (HMGR) mRNA, complete cds	sp|O64966|HMDH1_GOSHI	920	0	3-hydroxy-3-methylglutaryl-coenzyme A reductase 1 OS=Gossypium hirsutum GN=HMG1 PE=3 SV=1	YML075c	478	2e-134	COG1257	Hydroxymethylglutaryl-CoA reductase	K00021	0	909	pop:POPTR_820962	hydroxymethylglutaryl-CoA reductase (NADPH) [EC:1.1.1.34]	GO:0016104//triterpenoid biosynthetic process;GO:0015936//coenzyme A metabolic process;GO:0055114//oxidation-reduction process;GO:0016126//sterol biosynthetic process	GO:0004420//hydroxymethylglutaryl-CoA reductase (NADPH) activity;GO:0050661//NADP binding	GO:0016021//integral to membrane	--
Unigene15774_All	542	9	109	0.7577	9.8068	3.69408	Up	1.03299e-24	3.92683e-23	--	--	--	--	--	--	--	--	--	--	--	--	--	--	--	--	--	--	--	--	--	--	-	-	-	--
Unigene10087_All	1396	23	277	0.7518	9.6759	3.68598	Up	1.58253e-60	1.38551e-58	gi|449456500|ref|XP_004145987.1|	468	1e-130	PREDICTED: uncharacterized protein LOC101217049 [Cucumis sativus]	gi|449456499|ref|XM_004145939.1|	264	2e-67	PREDICTED: Cucumis sativus uncharacterized LOC101217049 (LOC101217049), mRNA	sp|Q9SF32|IQD1_ARATH	104	1e-22	Protein IQ-DOMAIN 1 OS=Arabidopsis thaliana GN=IQD1 PE=1 SV=1	--	--	--	--	--	--	--	--	--	--	-	-	-	--
CL8597.Contig1_All	2766	1527	18355	25.1922	323.594	3.68314	Up	0	0	gi|449434118|ref|XP_004134843.1|	591.3	3e-167	PREDICTED: peroxidase 64-like [Cucumis sativus] >gi|449517134|ref|XP_004165601.1| PREDICTED: peroxidase 64-like [Cucumis sativus]	gi|449434117|ref|XM_004134795.1|	1193	0	PREDICTED: Cucumis sativus peroxidase 64-like (LOC101217954), mRNA >gi|449517133|ref|XM_004165553.1| PREDICTED: Cucumis sativus peroxidase 64-like (LOC101217954), mRNA	sp|Q43872|PER64_ARATH	424	1e-118	Peroxidase 64 OS=Arabidopsis thaliana GN=PER64 PE=1 SV=1	--	--	--	--	--	K00430	6e-137	486	pop:POPTR_827034	peroxidase [EC:1.11.1.7]	GO:0055114//oxidation-reduction process;GO:0006979//response to oxidative stress	GO:0020037//heme binding;GO:0046872//metal ion binding;GO:0004601//peroxidase activity	GO:0009505//plant-type cell wall	--
Unigene12027_All	381	2	24	0.2395	3.0717	3.68094	Up	2.58136e-06	2.46498e-05	--	--	--	--	--	--	--	--	--	--	--	--	--	--	--	--	--	--	--	--	--	--	-	-	-	--
Unigene39842_All	229	2	24	0.3985	5.1106	3.68084	Up	2.58136e-06	2.46464e-05	--	--	--	--	--	--	--	--	--	--	--	--	--	--	--	--	--	--	--	--	--	--	-	-	-	--
Unigene37462_All	206	2	24	0.443	5.6812	3.68082	Up	2.58136e-06	2.46568e-05	--	--	--	--	--	--	--	--	--	--	--	--	--	--	--	--	--	--	--	--	--	--	-	-	-	--
CL132.Contig4_All	286	2	24	0.3191	4.0921	3.68076	Up	2.58136e-06	2.46603e-05	gi|212960378|gb|ACJ38665.1|	167.9	4e-41	cellulose synthase [Betula luminifera]	gi|449470290|ref|XM_004152803.1|	321	2e-85	PREDICTED: Cucumis sativus cellulose synthase A catalytic subunit 7 [UDP-forming]-like (LOC101214842), mRNA >gi|449507531|ref|XM_004163009.1| PREDICTED: Cucumis sativus cellulose synthase A catalytic subunit 7 [UDP-forming]-like (LOC101214842), mRNA	sp|Q9SWW6|CESA7_ARATH	152	3e-38	Cellulose synthase A catalytic subunit 7 [UDP-forming] OS=Arabidopsis thaliana GN=CESA7 PE=1 SV=1	--	--	--	--	--	K10999	2e-40	161	mtr:MTR_4g130510	cellulose synthase A [EC:2.4.1.12]	GO:0030244//cellulose biosynthetic process	GO:0016760//cellulose synthase (UDP-forming) activity;GO:0008270//zinc ion binding	GO:0016021//integral to membrane	--
CL2850.Contig1_All	1070	2	24	0.0853	1.0938	3.68066	Up	2.58136e-06	2.46533e-05	gi|449458137|ref|XP_004146804.1|	303.1	5e-81	PREDICTED: nudix hydrolase 16, mitochondrial-like [Cucumis sativus]	gi|449458136|ref|XM_004146756.1|	638	1e-180	PREDICTED: Cucumis sativus nudix hydrolase 16, mitochondrial-like (LOC101221241), mRNA	sp|Q9LHK1|NUD16_ARATH	224	7e-59	Nudix hydrolase 16, mitochondrial OS=Arabidopsis thaliana GN=NUDT16 PE=2 SV=1	mll0140	57.8	3e-08	COG0494	NTP pyrophosphohydrolases including oxidative damage repair enzymes	--	--	--	--	--	-	GO:0016787//hydrolase activity	GO:0005739//mitochondrion	--
Unigene11929_All	618	5	59	0.3692	4.6555	3.65646	Up	7.53408e-14	1.62483e-12	gi|449488556|ref|XP_004158085.1|	294.7	7e-79	PREDICTED: reticuline oxidase-like protein-like [Cucumis sativus]	gi|449488551|ref|XM_004158035.1|	285	3e-74	PREDICTED: Cucumis sativus reticuline oxidase-like protein-like (LOC101223317), mRNA	sp|Q8GTB6|THCAS_CANSA	178	2e-45	Tetrahydrocannabinolic acid synthase OS=Cannabis sativa PE=1 SV=1	BS_yvdP	60.8	2e-09	COG0277	FAD/FMN-containing dehydrogenases	--	--	--	--	--	-	GO:0016614//oxidoreductase activity, acting on CH-OH group of donors	-	--
CL103.Contig6_All	761	19	223	1.1393	14.2896	3.64875	Up	1.2647e-48	9.05504e-47	gi|449520669|ref|XP_004167356.1|	417.5	1e-115	PREDICTED: LOW QUALITY PROTEIN: phenylalanine ammonia-lyase-like, partial [Cucumis sativus]	gi|449451212|ref|XM_004143308.1|	557	1e-156	PREDICTED: Cucumis sativus phenylalanine ammonia-lyase-like (LOC101222092), mRNA >gi|449482591|ref|XM_004156290.1| PREDICTED: Cucumis sativus phenylalanine ammonia-lyase-like (LOC101226278), mRNA	sp|P45730|PALY_POPTR	381	3e-106	Phenylalanine ammonia-lyase OS=Populus trichocarpa GN=PAL PE=2 SV=1	--	--	--	--	--	K10775	8e-107	384	rcu:RCOM_0262230	phenylalanine ammonia-lyase [EC:4.3.1.24]	GO:0006979//response to oxidative stress;GO:0006952//defense response;GO:0006598//polyamine catabolic process;GO:0009805//coumarin biosynthetic process;GO:0010224//response to UV-B;GO:0009800//cinnamic acid biosynthetic process;GO:0009611//response to wounding;GO:0006559//L-phenylalanine catabolic process;GO:0009963//positive regulation of flavonoid biosynthetic process;GO:0042398//cellular modif…	GO:0045548//phenylalanine ammonia-lyase activity	GO:0005829//cytosol	--
Unigene38330_All	235	18	211	3.4953	43.7838	3.64691	Up	4.54468e-46	3.08095e-44	gi|449482472|ref|XP_004156293.1|	146.4	1e-34	PREDICTED: LOW QUALITY PROTEIN: phenylalanine ammonia-lyase-like [Cucumis sativus]	gi|449482471|ref|XM_004156245.1|	315	1e-83	PREDICTED: Cucumis sativus phenylalanine ammonia-lyase-like (LOC101218144), mRNA	sp|P45730|PALY_POPTR	138	7e-34	Phenylalanine ammonia-lyase OS=Populus trichocarpa GN=PAL PE=2 SV=1	--	--	--	--	--	K10775	3e-33	137	gmx:100818777	phenylalanine ammonia-lyase [EC:4.3.1.24]	-	-	-	--
CL3609.Contig1_All	894	66	770	3.3689	42.0002	3.64005	Up	1.0889e-163	2.35889e-161	gi|449450578|ref|XP_004143039.1|	226.5	4e-58	PREDICTED: uncharacterized protein LOC101204468 [Cucumis sativus]	gi|449450577|ref|XM_004142991.1|	214	1e-52	PREDICTED: Cucumis sativus uncharacterized LOC101204468 (LOC101204468), mRNA	sp|Q2V9B0|MY1R1_SOLTU	121	5e-28	Transcription factor MYB1R1 OS=Solanum tuberosum PE=2 SV=1	--	--	--	--	--	--	--	--	--	--	-	GO:0003676//nucleic acid binding	-	--
Unigene589_All	1074	379	4419	16.1033	200.64	3.63918	Up	0	0	gi|449443426|ref|XP_004139478.1|	293.1	5e-78	PREDICTED: uncharacterized protein LOC101203874 [Cucumis sativus]	gi|449443425|ref|XM_004139430.1|	533	1e-148	PREDICTED: Cucumis sativus uncharacterized LOC101203874 (LOC101203874), mRNA	--	--	--	--	aq_1006	51.6	2e-06	COG0419	ATPase involved in DNA repair	--	--	--	--	--	GO:0045492//xylan biosynthetic process;GO:0010413//glucuronoxylan metabolic process	-	GO:0009507//chloroplast	--
CL1069.Contig1_All	406	5	58	0.562	6.9663	3.63175	Up	1.44054e-13	3.04741e-12	gi|449469649|ref|XP_004152531.1|	181	4e-45	PREDICTED: uncharacterized protein LOC101217402 [Cucumis sativus] >gi|449524004|ref|XP_004169013.1| PREDICTED: uncharacterized protein LOC101226845 [Cucumis sativus]	gi|449469648|ref|XM_004152483.1|	89.7	2e-15	PREDICTED: Cucumis sativus uncharacterized LOC101217402 (LOC101217402), mRNA >gi|449524003|ref|XM_004168965.1| PREDICTED: Cucumis sativus uncharacterized LOC101226845 (LOC101226845), mRNA	sp|Q6NMK1|GXM1_ARATH	135	8e-33	Glucuronoxylan 4-O-methyltransferase 1 OS=Arabidopsis thaliana GN=GXM1 PE=1 SV=1	--	--	--	--	--	--	--	--	--	--	GO:0045492//xylan biosynthetic process;GO:0010413//glucuronoxylan metabolic process	GO:0030775//glucuronoxylan 4-O-methyltransferase activity	GO:0005794//Golgi apparatus;GO:0005576//extracellular region	--
Unigene30910_All	1273	247	2865	8.8542	109.748	3.63168	Up	0	0	gi|449441298|ref|XP_004138419.1|	757.3	0	PREDICTED: uncharacterized protein LOC101203137 [Cucumis sativus]	gi|449441297|ref|XM_004138371.1|	1047	0	PREDICTED: Cucumis sativus uncharacterized LOC101203137 (LOC101203137), mRNA	--	--	--	--	--	--	--	--	--	--	--	--	--	--	GO:0009414//response to water deprivation;GO:0009651//response to salt stress;GO:0050826//response to freezing;GO:0045893//positive regulation of transcription, DNA-dependent	-	GO:0005634//nucleus	--
Unigene11663_All	1005	130	1504	5.9028	72.976	3.62795	Up	0	0	gi|307136284|gb|ADN34111.1|	403.7	2e-111	chaperonin-60 kDa protein [Cucumis melo subsp. melo]	gi|449529215|ref|XM_004171549.1|	278	1e-71	PREDICTED: Cucumis sativus chaperonin CPN60-like 2, mitochondrial-like (LOC101224600), mRNA	sp|Q9FPQ6|GP1_CHLRE	88.2	7e-18	Vegetative cell wall protein gp1 OS=Chlamydomonas reinhardtii GN=GP1 PE=2 SV=1	YDL140c	63.5	5e-10	COG0086	DNA-directed RNA polymerase, beta' subunit/160 kD subunit	K01115	4e-14	77	vcn:VOLCADRAFT_99471	phospholipase D [EC:3.1.4.4]	-	-	-	--
Unigene22169_All	398	11	127	1.2612	15.5603	3.625	Up	3.7168e-28	1.59704e-26	gi|449450312|ref|XP_004142907.1|	132.9	1e-30	PREDICTED: squalene monooxygenase-like [Cucumis sativus]	gi|449450311|ref|XM_004142859.1|	161	7e-37	PREDICTED: Cucumis sativus squalene monooxygenase-like (LOC101213038), mRNA	sp|O48651|ERG1_PANGI	71.6	1e-13	Squalene monooxygenase OS=Panax ginseng PE=2 SV=1	SPBC713.12	50.4	8e-07	COG0654	2-polyprenyl-6-methoxyphenol hydroxylase and related FAD-dependent oxidoreductases	K00511	4e-24	107	pop:POPTR_831444	squalene monooxygenase [EC:1.14.13.132]	-	GO:0016491//oxidoreductase activity	-	--
CL5002.Contig6_All	225	4	46	0.8113	9.9695	3.61921	Up	5.60964e-11	9.71183e-10	--	--	--	--	gi|449527940|ref|XM_004170918.1|	69.9	1e-09	PREDICTED: Cucumis sativus protein FAF-like, chloroplastic-like (LOC101203872), mRNA	--	--	--	--	--	--	--	--	--	--	--	--	--	--	-	-	-	--
Unigene39334_All	261	2	23	0.3497	4.2972	3.61921	Up	4.95846e-06	4.50696e-05	gi|449503628|ref|XP_004162097.1|	89.7	1e-17	PREDICTED: G-type lectin S-receptor-like serine/threonine-protein kinase RLK1-like [Cucumis sativus]	gi|449503627|ref|XM_004162049.1|	73.8	8e-11	PREDICTED: Cucumis sativus G-type lectin S-receptor-like serine/threonine-protein kinase RLK1-like (LOC101214160), mRNA	sp|Q39202|RLK1_ARATH	47	3e-06	G-type lectin S-receptor-like serine/threonine-protein kinase RLK1 OS=Arabidopsis thaliana GN=RLK1 PE=2 SV=2	--	--	--	--	--	--	--	--	--	--	GO:0016310//phosphorylation	GO:0004672//protein kinase activity;GO:0000166//nucleotide binding	-	--
CL8213.Contig1_All	1132	5	57	0.2016	2.4554	3.60639	Up	2.7509e-13	5.69291e-12	gi|449451970|ref|XP_004143733.1|	194.1	2e-136	PREDICTED: lignin-forming anionic peroxidase-like [Cucumis sativus] >gi|449521798|ref|XP_004167916.1| PREDICTED: lignin-forming anionic peroxidase-like [Cucumis sativus]	gi|449521797|ref|XM_004167868.1|	153	5e-34	PREDICTED: Cucumis sativus lignin-forming anionic peroxidase-like (LOC101215530), mRNA	sp|P11965|PERX_TOBAC	223	7e-98	Lignin-forming anionic peroxidase OS=Nicotiana tabacum PE=2 SV=1	--	--	--	--	--	K00430	2e-100	241	vvi:100265513	peroxidase [EC:1.11.1.7]	-	GO:0016491//oxidoreductase activity;GO:0005488//binding	-	--
Unigene26696_All	1063	242	2745	10.3887	125.924	3.59946	Up	0	0	gi|449443654|ref|XP_004139592.1|	391	1e-107	PREDICTED: uncharacterized protein LOC101212136 [Cucumis sativus]	gi|449443653|ref|XM_004139544.1|	365	6e-98	PREDICTED: Cucumis sativus uncharacterized LOC101212136 (LOC101212136), mRNA	sp|Q9FPQ6|GP1_CHLRE	63.9	1e-10	Vegetative cell wall protein gp1 OS=Chlamydomonas reinhardtii GN=GP1 PE=2 SV=1	--	--	--	--	--	K13171	9e-08	56.2	ath:AT2G29210	serine/arginine repetitive matrix protein 1	GO:0051607//defense response to virus	-	GO:0009506//plasmodesma;GO:0009505//plant-type cell wall;GO:0005739//mitochondrion;GO:0005886//plasma membrane	--
Unigene39247_All	223	3	34	0.6139	7.4349	3.59824	Up	2.24942e-08	2.9579e-07	--	--	--	--	--	--	--	--	--	--	--	--	--	--	--	--	--	--	--	--	--	--	-	-	-	--
Unigene5370_All	429	18	203	1.9147	23.0748	3.59113	Up	7.88216e-44	5.07378e-42	gi|449489177|ref|XP_004158238.1|	225.7	1e-58	PREDICTED: transcription repressor MYB4-like [Cucumis sativus]	gi|449489176|ref|XM_004158190.1|	236	2e-59	PREDICTED: Cucumis sativus transcription repressor MYB6-like (LOC101210412), mRNA	sp|Q9LXV2|MYB46_ARATH	206	3e-54	Transcription factor MYB46 OS=Arabidopsis thaliana GN=MYB46 PE=2 SV=1	ECU11g1690	111	5e-25	COG5147	Myb superfamily proteins, including transcription factors and mRNA splicing factors	K09422	3e-58	221	pop:POPTR_722775	myb proto-oncogene protein, plant	GO:0045893//positive regulation of transcription, DNA-dependent;GO:2000652//regulation of secondary cell wall biogenesis	GO:0003677//DNA binding;GO:0003700//sequence-specific DNA binding transcription factor activity;GO:0003682//chromatin binding	GO:0005634//nucleus	--
Unigene29489_All	812	19	213	1.0678	12.7915	3.58247	Up	7.94138e-46	5.3249e-44	gi|449456076|ref|XP_004145776.1|	141.7	1e-32	PREDICTED: uncharacterized protein LOC101203164 [Cucumis sativus] >gi|449510837|ref|XP_004163777.1| PREDICTED: uncharacterized LOC101203164 [Cucumis sativus]	gi|449456075|ref|XM_004145728.1|	135	8e-29	PREDICTED: Cucumis sativus uncharacterized LOC101203164 (LOC101203164), mRNA >gi|449510836|ref|XM_004163729.1| PREDICTED: Cucumis sativus uncharacterized LOC101203164 (LOC101203164), mRNA	sp|Q9LUI1|LRX6_ARATH	47.8	8e-06	Leucine-rich repeat extensin-like protein 6 OS=Arabidopsis thaliana GN=LRX6 PE=2 SV=1	--	--	--	--	--	--	--	--	--	--	-	-	-	--
Unigene25696_All	337	2	22	0.2708	3.1834	3.55527	Up	9.49748e-06	8.15247e-05	--	--	--	--	--	--	--	--	--	--	--	--	--	--	--	--	--	--	--	--	--	--	-	-	-	--
Unigene36221_All	274	3	33	0.4996	5.873	3.55525	Up	4.29556e-08	5.43592e-07	--	--	--	--	--	--	--	--	--	--	--	--	--	--	--	--	--	--	--	--	--	--	-	-	-	--
Unigene21722_All	621	13	143	0.9553	11.229	3.55513	Up	4.81468e-31	2.263e-29	--	--	--	--	--	--	--	--	--	--	--	--	--	--	--	--	--	--	--	--	--	--	-	-	-	--
Unigene39855_All	295	2	22	0.3094	3.6366	3.55505	Up	9.49748e-06	8.1535e-05	gi|449508404|ref|XP_004163304.1|	194.5	4e-49	PREDICTED: probable metal-nicotianamine transporter YSL7-like [Cucumis sativus]	gi|449508403|ref|XM_004163256.1|	339	9e-91	PREDICTED: Cucumis sativus probable metal-nicotianamine transporter YSL7-like (LOC101222425), mRNA	sp|Q7X660|YSL11_ORYSJ	148	6e-37	Probable metal-nicotianamine transporter YSL11 OS=Oryza sativa subsp. japonica GN=YSL11 PE=2 SV=1	YGL114w	50.8	6e-07	COG1297	Predicted membrane protein	--	--	--	--	--	GO:0055085//transmembrane transport	-	-	--
Unigene39342_All	396	2	22	0.2305	2.7091	3.55497	Up	9.49748e-06	8.15143e-05	--	--	--	--	--	--	--	--	--	--	--	--	--	--	--	--	--	--	--	--	--	--	-	-	-	--
Unigene28927_All	436	11	120	1.1513	13.4213	3.54319	Up	3.35416e-26	1.34623e-24	gi|449466266|ref|XP_004150847.1|	152.9	1e-36	PREDICTED: uncharacterized protein LOC101210555 [Cucumis sativus] >gi|449488123|ref|XP_004157945.1| PREDICTED: uncharacterized protein LOC101229363 [Cucumis sativus]	gi|449488122|ref|XM_004157897.1|	192	2e-46	PREDICTED: Cucumis sativus uncharacterized LOC101229363 (LOC101229363), mRNA	--	--	--	--	--	--	--	--	--	--	--	--	--	--	-	-	-	--
CL7734.Contig2_All	2513	22	239	0.3995	4.6377	3.53714	Up	1.05647e-50	7.79536e-49	gi|449518968|ref|XP_004166507.1|	974.5	0	PREDICTED: LOW QUALITY PROTEIN: laccase-17-like [Cucumis sativus]	gi|449518967|ref|XM_004166459.1|	531	1e-147	PREDICTED: Cucumis sativus laccase-17-like (LOC101205653), mRNA	sp|Q9FJD5|LAC17_ARATH	837	0	Laccase-17 OS=Arabidopsis thaliana GN=LAC17 PE=2 SV=1	SPAC1F7.08	146	2e-34	COG2132	Putative multicopper oxidases	K00423	5e-64	244	ppp:PHYPADRAFT_163787	L-ascorbate oxidase [EC:1.10.3.3]	GO:0046274//lignin catabolic process;GO:0055114//oxidation-reduction process	GO:0005507//copper ion binding;GO:0052716//hydroquinone:oxygen oxidoreductase activity;GO:0008447//L-ascorbate oxidase activity	GO:0048046//apoplast	--
Unigene10221_All	1709	101	1091	2.6969	31.1302	3.52894	Up	3.31422e-225	9.86805e-223	gi|255582278|ref|XP_002531930.1|	566.2	6e-160	UDP-glucosyltransferase, putative [Ricinus communis] >gi|223528409|gb|EEF30444.1| UDP-glucosyltransferase, putative [Ricinus communis]	gi|470140907|ref|XM_004306130.1|	61.9	2e-06	PREDICTED: Fragaria vesca subsp. vesca UDP-glycosyltransferase 73C1-like (LOC101310346), mRNA	sp|Q9ZQ95|U73C6_ARATH	524	7e-149	UDP-glycosyltransferase 73C6 OS=Arabidopsis thaliana GN=UGT73C6 PE=2 SV=1	--	--	--	--	--	K13496	2e-148	524	ath:AT2G36790	UDP-glucosyl transferase 73C [EC:2.4.1.-]	GO:0051555//flavonol biosynthetic process	GO:0080046//quercetin 4'-O-glucosyltransferase activity;GO:0080043//quercetin 3-O-glucosyltransferase activity;GO:0080044//quercetin 7-O-glucosyltransferase activity	GO:0009507//chloroplast	--
Unigene21262_All	903	151	1630	7.6308	88.0235	3.52798	Up	0	0	gi|255546921|ref|XP_002514518.1|	219.6	5e-56	conserved hypothetical protein [Ricinus communis] >gi|223546122|gb|EEF47624.1| conserved hypothetical protein [Ricinus communis]	--	--	--	--	sp|Q9S740|AGP19_ARATH	183	1e-46	Lysine-rich arabinogalactan protein 19 OS=Arabidopsis thaliana GN=AGP19 PE=2 SV=2	Rv3876	92.4	9e-19	COG0455	ATPases involved in chromosome partitioning	K01115	1e-26	118	vcn:VOLCADRAFT_99471	phospholipase D [EC:3.1.4.4]	-	-	GO:0016020//membrane	--
Unigene18880_All	371	3	32	0.369	4.2061	3.51079	Up	8.18506e-08	9.99855e-07	--	--	--	--	--	--	--	--	--	--	--	--	--	--	--	--	--	--	--	--	--	--	-	-	-	--
Unigene12130_All	246	3	32	0.5565	6.3433	3.51078	Up	8.18506e-08	1.00004e-06	--	--	--	--	--	--	--	--	--	--	--	--	--	--	--	--	--	--	--	--	--	--	-	-	-	--
CL8325.Contig1_All	217	3	32	0.6309	7.191	3.51071	Up	8.18506e-08	9.99675e-07	gi|449528241|ref|XP_004171114.1|	146.4	1e-34	PREDICTED: LOW QUALITY PROTEIN: phospholipase C 3-like, partial [Cucumis sativus]	gi|449528240|ref|XM_004171066.1|	234	3e-59	PREDICTED: Cucumis sativus phospholipase C 3-like (LOC101203226), partial mRNA	--	--	--	--	--	--	--	--	--	K01114	2e-33	138	gmx:100805391	phospholipase C [EC:3.1.4.3]	GO:0009395//phospholipid catabolic process;GO:0009628//response to abiotic stimulus;GO:0009247//glycolipid biosynthetic process;GO:0016036//cellular response to phosphate starvation	GO:0004629//phospholipase C activity	GO:0005829//cytosol;GO:0005773//vacuole;GO:0005886//plasma membrane	--
Unigene25583_All	362	3	32	0.3782	4.3106	3.51067	Up	8.18506e-08	9.99314e-07	--	--	--	--	--	--	--	--	--	--	--	--	--	--	--	--	--	--	--	--	--	--	-	-	-	--
Unigene32203_All	357	3	32	0.3835	4.371	3.51066	Up	8.18506e-08	9.99494e-07	gi|449457253|ref|XP_004146363.1|	55.8	2e-07	PREDICTED: uncharacterized protein LOC101210202 [Cucumis sativus]	--	--	--	--	--	--	--	--	--	--	--	--	--	--	--	--	--	--	-	-	-	--
CL4030.Contig3_All	2335	328	3478	6.4101	72.6342	3.50223	Up	0	0	gi|449476540|ref|XP_004154765.1|	117.9	8e-25	PREDICTED: COBRA-like protein 4-like [Cucumis sativus]	gi|449476539|ref|XM_004154717.1|	1374	0	PREDICTED: Cucumis sativus COBRA-like protein 4-like (LOC101217724), mRNA	sp|Q9LFW3|COBL4_ARATH	784	0	COBRA-like protein 4 OS=Arabidopsis thaliana GN=COBL4 PE=2 SV=2	--	--	--	--	--	--	--	--	--	--	GO:0009834//secondary cell wall biogenesis;GO:0009808//lignin metabolic process;GO:0009830//cell wall modification involved in abscission	-	GO:0009531//secondary cell wall	--
Unigene31918_All	349	5	53	0.6538	7.4054	3.50166	Up	3.60954e-12	6.90728e-11	--	--	--	--	gi|17148521|emb|AJ420886.1|	58	6e-06	Entandrophragma cylindricum microsatellite DNA, clone pEcCIR22	--	--	--	--	--	--	--	--	--	--	--	--	--	--	-	-	-	--
Unigene21640_All	390	7	74	0.8191	9.2526	3.49775	Up	1.72054e-16	4.38663e-15	gi|307136218|gb|ADN34055.1|	167.9	4e-41	galactosyltransferase [Cucumis melo subsp. melo]	gi|449488342|ref|XM_004157959.1|	276	2e-71	PREDICTED: Cucumis sativus probable beta-1,3-galactosyltransferase 2-like (LOC101224918), mRNA	sp|A8MRC7|B3GT2_ARATH	135	7e-33	Probable beta-1,3-galactosyltransferase 2 OS=Arabidopsis thaliana GN=B3GALT2 PE=2 SV=1	--	--	--	--	--	--	--	--	--	--	GO:0006486//protein glycosylation	GO:0047220//galactosylxylosylprotein 3-beta-galactosyltransferase activity	GO:0005794//Golgi apparatus;GO:0016021//integral to membrane	--
CL3838.Contig1_All	534	13	137	1.1109	12.5106	3.49335	Up	2.23496e-29	9.98405e-28	gi|449454865|ref|XP_004145174.1|	240.7	8e-63	PREDICTED: tryptophan synthase beta chain 2, chloroplastic-like [Cucumis sativus] >gi|449473775|ref|XP_004153979.1| PREDICTED: tryptophan synthase beta chain 2, chloroplastic-like [Cucumis sativus]	gi|449473774|ref|XM_004153931.1|	268	5e-69	PREDICTED: Cucumis sativus tryptophan synthase beta chain 2, chloroplastic-like (LOC101218187), mRNA	sp|P14671|TRPB1_ARATH	148	2e-36	Tryptophan synthase beta chain 1, chloroplastic OS=Arabidopsis thaliana GN=TSB1 PE=2 SV=1	all3794	139	2e-33	COG0133	Tryptophan synthase beta chain	K01696	7e-47	184	vvi:100250414	tryptophan synthase beta chain [EC:4.2.1.20]	GO:0000162//tryptophan biosynthetic process	GO:0004834//tryptophan synthase activity;GO:0016491//oxidoreductase activity;GO:0030170//pyridoxal phosphate binding	GO:0005739//mitochondrion	--
Unigene25907_All	340	2	21	0.2684	3.0119	3.48822	Up	1.81358e-05	0.000146853	gi|256032242|gb|ACU57087.1|	155.6	2e-37	putative heat shock protein 70 [Pyropia yezoensis]	gi|32992547|dbj|AK107338.1|	603	1e-170	Oryza sativa Japonica Group cDNA clone:002-126-F12, full insert sequence	sp|Q9S9N1|HSP7E_ARATH	149	4e-37	Heat shock 70 kDa protein 5 OS=Arabidopsis thaliana GN=HSP70-5 PE=2 SV=1	SPBC1709.05	172	1e-43	COG0443	Molecular chaperone	K03283	2e-37	151	aly:ARALYDRAFT_471804	heat shock 70kDa protein 1/8	GO:0009615//response to virus;GO:0034976//response to endoplasmic reticulum stress;GO:0006457//protein folding;GO:0010286//heat acclimation;GO:0009644//response to high light intensity;GO:0042542//response to hydrogen peroxide	GO:0005524//ATP binding	GO:0005829//cytosol;GO:0005618//cell wall;GO:0033009;GO:0009507//chloroplast;GO:0005886//plasma membrane	--
Unigene22386_All	249	2	21	0.3665	4.1126	3.48817	Up	1.81358e-05	0.00014687	--	--	--	--	--	--	--	--	--	--	--	--	--	--	--	--	--	--	--	--	--	--	-	-	-	--
CL3247.Contig1_All	301	4	42	0.6064	6.8043	3.48811	Up	7.38556e-10	1.15285e-08	gi|462411339|gb|EMJ16388.1|	68.2	4e-11	hypothetical protein PRUPE_ppa013959mg [Prunus persica]	gi|192335978|gb|EU829591.1|	97.6	6e-18	Linum usitatissimum clone LU0023D05 mRNA sequence	sp|P47926|RSI1_SOLLC	63.9	2e-11	Protein RSI-1 OS=Solanum lycopersicum GN=RSI-1 PE=2 SV=1	--	--	--	--	--	--	--	--	--	--	-	-	-	--
Unigene39379_All	248	2	21	0.368	4.1292	3.48808	Up	1.81358e-05	0.000146888	--	--	--	--	--	--	--	--	--	--	--	--	--	--	--	--	--	--	--	--	--	--	-	-	-	--
Unigene39569_All	334	4	42	0.5465	6.132	3.48806	Up	7.38556e-10	1.15258e-08	--	--	--	--	--	--	--	--	--	--	--	--	--	--	--	--	--	--	--	--	--	--	-	-	-	--
Unigene39460_All	383	2	21	0.2383	2.6737	3.48799	Up	1.81358e-05	0.000146906	--	--	--	--	--	--	--	--	--	--	--	--	--	--	--	--	--	--	--	--	--	--	-	-	-	--
Unigene39811_All	269	2	21	0.3393	3.8068	3.48795	Up	1.81358e-05	0.000146835	--	--	--	--	--	--	--	--	--	--	--	--	--	--	--	--	--	--	--	--	--	--	-	-	-	--
Unigene30241_All	1139	159	1667	6.3702	71.3691	3.48589	Up	0	0	gi|449431962|ref|XP_004133769.1|	478	1e-133	PREDICTED: putative expansin-B2-like [Cucumis sativus] >gi|449526511|ref|XP_004170257.1| PREDICTED: putative expansin-B2-like [Cucumis sativus]	gi|349724273|emb|FQ388309.1|	63.9	3e-07	Vitis vinifera clone SS0AEB23YJ07	sp|Q7XT40|EXB15_ORYSJ	323	1e-88	Expansin-B15 OS=Oryza sativa subsp. japonica GN=EXPB15 PE=3 SV=2	--	--	--	--	--	--	--	--	--	--	GO:0009831//plant-type cell wall modification involved in multidimensional cell growth;GO:0019953//sexual reproduction;GO:0009828//plant-type cell wall loosening;GO:0009826//unidimensional cell growth	-	GO:0005576//extracellular region	--
Unigene9308_All	309	3	31	0.443	4.8922	3.4651	Up	1.55604e-07	1.83002e-06	--	--	--	--	gi|449459715|ref|XM_004147544.1|	85.7	2e-14	PREDICTED: Cucumis sativus adenine phosphoribosyltransferase 1-like (LOC101216186), mRNA	--	--	--	--	--	--	--	--	--	--	--	--	--	--	-	-	-	--
Unigene21623_All	601	3	31	0.2278	2.5153	3.46489	Up	1.55604e-07	1.8297e-06	gi|449464536|ref|XP_004149985.1|	276.9	1e-73	PREDICTED: peroxidase 72-like [Cucumis sativus] >gi|449491412|ref|XP_004158888.1| PREDICTED: peroxidase 72-like [Cucumis sativus]	gi|449491411|ref|XM_004158840.1|	521	1e-145	PREDICTED: Cucumis sativus peroxidase 72-like (LOC101204648), mRNA	sp|Q9SI16|PER15_ARATH	231	3e-61	Peroxidase 15 OS=Arabidopsis thaliana GN=PER15 PE=2 SV=1	--	--	--	--	--	K00430	2e-68	256	pop:POPTR_719600	peroxidase [EC:1.11.1.7]	GO:0055114//oxidation-reduction process;GO:0006979//response to oxidative stress	GO:0020037//heme binding;GO:0046872//metal ion binding;GO:0004601//peroxidase activity	-	--
Unigene25925_All	438	4	41	0.4167	4.5647	3.45344	Up	1.40063e-09	2.13022e-08	gi|359472877|ref|XP_003631207.1|	102.1	2e-21	PREDICTED: uncharacterized protein LOC100255988 [Vitis vinifera] >gi|147861978|emb|CAN80912.1| hypothetical protein VITISV_039820 [Vitis vinifera]	gi|159472804|ref|XM_001694483.1|	60	2e-06	Chlamydomonas reinhardtii predicted protein (CHLREDRAFT_148186) mRNA, complete cds	sp|Q9LUI1|LRX6_ARATH	60.5	4e-10	Leucine-rich repeat extensin-like protein 6 OS=Arabidopsis thaliana GN=LRX6 PE=2 SV=1	CC3494_1	52	4e-07	COG3637	Opacity protein and related surface antigens	K06640	7e-08	54.3	vcn:VOLCADRAFT_88866	serine/threonine-protein kinase ATR [EC:2.7.11.1]	-	-	GO:0031225//anchored to membrane;GO:0044464//cell part	--
CL103.Contig7_All	1205	37	379	1.4012	15.3374	3.45232	Up	7.27906e-78	8.05212e-76	gi|449451213|ref|XP_004143356.1|	768.8	0	PREDICTED: phenylalanine ammonia-lyase-like [Cucumis sativus] >gi|449482592|ref|XP_004156338.1| PREDICTED: phenylalanine ammonia-lyase-like [Cucumis sativus]	gi|355340442|gb|JN675927.1|	1132	0	Cucumis sativus phenylalanine ammonia lyase (PAL) mRNA, complete cds	sp|P45732|PALY_STYHU	751	0	Phenylalanine ammonia-lyase OS=Stylosanthes humilis GN=PAL17.1 PE=2 SV=1	RSp0365	224	3e-58	COG2986	Histidine ammonia-lyase	K10775	0	754	rcu:RCOM_1355480	phenylalanine ammonia-lyase [EC:4.3.1.24]	GO:0009800//cinnamic acid biosynthetic process;GO:0006559//L-phenylalanine catabolic process	GO:0045548//phenylalanine ammonia-lyase activity	GO:0005737//cytoplasm	--
Unigene23663_All	683	13	133	0.8686	9.4958	3.45053	Up	2.85202e-28	1.23173e-26	--	--	--	--	gi|115468449|ref|NM_001064359.1|	60	3e-06	Oryza sativa Japonica Group Os06g0547900 (Os06g0547900) mRNA, complete cds	--	--	--	--	--	--	--	--	--	--	--	--	--	--	-	-	-	--
Unigene10169_All	2283	136	1391	2.7184	29.7112	3.45018	Up	4.92552e-281	1.85984e-278	gi|449470415|ref|XP_004152912.1|	1037.7	0	PREDICTED: probable galacturonosyltransferase 12-like [Cucumis sativus] >gi|449521279|ref|XP_004167657.1| PREDICTED: probable galacturonosyltransferase 12-like [Cucumis sativus]	gi|449470414|ref|XM_004152864.1|	2391	0	PREDICTED: Cucumis sativus probable galacturonosyltransferase 12-like (LOC101210640), mRNA >gi|449521278|ref|XM_004167609.1| PREDICTED: Cucumis sativus probable galacturonosyltransferase 12-like (LOC101210640), mRNA	sp|Q9FH36|GAUTC_ARATH	897	0	Probable galacturonosyltransferase 12 OS=Arabidopsis thaliana GN=GAUT12 PE=2 SV=1	--	--	--	--	--	K13648	0	963	vvi:100264056	alpha-1,4-galacturonosyltransferase [EC:2.4.1.43]	GO:0071555//cell wall organization;GO:0010417//glucuronoxylan biosynthetic process;GO:0009832//plant-type cell wall biogenesis;GO:0010089//xylem development	GO:0047262//polygalacturonate 4-alpha-galacturonosyltransferase activity	GO:0005794//Golgi apparatus	--
Unigene7386_All	527	22	225	1.905	20.8195	3.45007	Up	7.91104e-47	5.47287e-45	--	--	--	--	gi|340746224|gb|AC233254.2|	58	1e-05	Medicago truncatula strain A17 clone mth2-77i22, complete sequence	--	--	--	--	--	--	--	--	--	--	--	--	--	--	-	-	-	--
Unigene20070_All	911	99	1010	4.959	54.0632	3.44653	Up	2.25234e-204	6.08934e-202	gi|449439773|ref|XP_004137660.1|	498	8e-140	PREDICTED: cinnamoyl-CoA reductase 1-like [Cucumis sativus]	gi|449439772|ref|XM_004137612.1|	591	1e-166	PREDICTED: Cucumis sativus cinnamoyl-CoA reductase 1-like (LOC101218838), mRNA	sp|Q9S9N9|CCR1_ARATH	416	1e-116	Cinnamoyl-CoA reductase 1 OS=Arabidopsis thaliana GN=CCR1 PE=1 SV=1	mll1975	127	3e-29	COG0451	Nucleoside-diphosphate-sugar epimerases	K09753	3e-126	449	rcu:RCOM_0470860	cinnamoyl-CoA reductase [EC:1.2.1.44]	GO:0009409//response to cold;GO:0009809//lignin biosynthetic process;GO:0055114//oxidation-reduction process	GO:0016621//cinnamoyl-CoA reductase activity;GO:0045552//dihydrokaempferol 4-reductase activity;GO:0050662//coenzyme binding;GO:0000166//nucleotide binding	-	--
Unigene19268_All	521	5	51	0.4379	4.7734	3.44634	Up	1.29616e-11	2.35691e-10	gi|449533359|ref|XP_004173643.1|	285.8	2e-76	PREDICTED: GDSL esterase/lipase At5g37690-like, partial [Cucumis sativus]	gi|449533358|ref|XM_004173595.1|	426	1e-116	PREDICTED: Cucumis sativus GDSL esterase/lipase At5g37690-like (LOC101222417), partial mRNA	sp|Q9FHQ1|GDL80_ARATH	231	2e-61	GDSL esterase/lipase At5g37690 OS=Arabidopsis thaliana GN=At5g37690 PE=2 SV=1	XF0781_1	51.2	9e-07	COG3240	Phospholipase/lecithinase/hemolysin	K00514	3e-15	79.3	rcu:RCOM_1428040	zeta-carotene desaturase [EC:1.3.5.6]	GO:0006629//lipid metabolic process	GO:0016298//lipase activity	GO:0005576//extracellular region	--
CL64.Contig1_All	954	5	51	0.2392	2.6069	3.44605	Up	1.29616e-11	2.35627e-10	gi|449433780|ref|XP_004134675.1|	105.5	5e-101	PREDICTED: rac-like GTP-binding protein 7-like [Cucumis sativus]	gi|449433779|ref|XM_004134627.1|	464	1e-128	PREDICTED: Cucumis sativus rac-like GTP-binding protein 7-like (LOC101218591), mRNA	sp|Q41253|RAC13_GOSHI	282	4e-96	Rac-like GTP-binding protein RAC13 OS=Gossypium hirsutum GN=RAC13 PE=2 SV=1	SPAC110.03	172	1e-42	COG1100	GTPase SAR1 and related small G proteins	K04392	1e-98	286	rcu:RCOM_1012270	Ras-related C3 botulinum toxin substrate 1	GO:0007264//small GTPase mediated signal transduction	GO:0005525//GTP binding;GO:0004767//sphingomyelin phosphodiesterase activity	GO:0005737//cytoplasm;GO:0005886//plasma membrane	--
CL5632.Contig2_All	2512	76	774	1.3806	15.0252	3.44402	Up	6.1679e-157	1.29467e-154	gi|449443572|ref|XP_004139551.1|	885.6	0	PREDICTED: uncharacterized protein LOC101221529 [Cucumis sativus]	gi|449531114|ref|XM_004172485.1|	795	0	PREDICTED: Cucumis sativus uncharacterized LOC101226039 (LOC101226039), mRNA	sp|Q10Q99|FH8_ORYSJ	56.2	9e-08	Formin-like protein 8 OS=Oryza sativa subsp. japonica GN=FH8 PE=2 SV=1	--	--	--	--	--	K01115	2e-08	59.7	vcn:VOLCADRAFT_99471	phospholipase D [EC:3.1.4.4]	GO:0045492//xylan biosynthetic process;GO:0009832//plant-type cell wall biogenesis;GO:0010413//glucuronoxylan metabolic process;GO:0010089//xylem development	-	GO:0009507//chloroplast	--
Unigene9194_All	1102	13	132	0.5383	5.841	3.43973	Up	5.38188e-28	2.3008e-26	gi|449445746|ref|XP_004140633.1|	453.8	2e-126	PREDICTED: uncharacterized protein LOC101220906 [Cucumis sativus]	gi|449445745|ref|XM_004140585.1|	137	3e-29	PREDICTED: Cucumis sativus uncharacterized LOC101220906 (LOC101220906), mRNA	--	--	--	--	--	--	--	--	--	--	--	--	--	--	GO:0045492//xylan biosynthetic process;GO:0010413//glucuronoxylan metabolic process	-	GO:0016020//membrane;GO:0005739//mitochondrion	--
Unigene15284_All	778	14	141	0.8212	8.8377	3.42787	Up	1.00547e-29	4.53665e-28	gi|449455716|ref|XP_004145597.1|	238	1e-61	PREDICTED: uncharacterized protein LOC101216898 [Cucumis sativus] >gi|449485275|ref|XP_004157120.1| PREDICTED: uncharacterized protein LOC101225904 [Cucumis sativus]	gi|449455715|ref|XM_004145549.1|	107	2e-20	PREDICTED: Cucumis sativus uncharacterized LOC101216898 (LOC101216898), mRNA >gi|449485274|ref|XM_004157072.1| PREDICTED: Cucumis sativus uncharacterized LOC101225904 (LOC101225904), mRNA	sp|Q9FPQ6|GP1_CHLRE	51.2	6e-07	Vegetative cell wall protein gp1 OS=Chlamydomonas reinhardtii GN=GP1 PE=2 SV=1	--	--	--	--	--	--	--	--	--	--	-	-	GO:0005739//mitochondrion	--
Unigene6880_All	553	2	20	0.165	1.7636	3.41799	Up	3.4516e-05	0.000262212	--	--	--	--	--	--	--	--	--	--	--	--	--	--	--	--	--	--	--	--	--	--	-	-	-	--
CL5126.Contig2_All	1023	2	20	0.0892	0.9534	3.41797	Up	3.4516e-05	0.000262478	gi|449435810|ref|XP_004135687.1|	116.7	8e-84	PREDICTED: meiotic nuclear division protein 1 homolog [Cucumis sativus] >gi|449489839|ref|XP_004158432.1| PREDICTED: meiotic nuclear division protein 1 homolog [Cucumis sativus]	gi|449435809|ref|XM_004135639.1|	470	1e-129	PREDICTED: Cucumis sativus meiotic nuclear division protein 1 homolog (LOC101204189), mRNA >gi|449489838|ref|XM_004158384.1| PREDICTED: Cucumis sativus meiotic nuclear division protein 1 homolog (LOC101229141), mRNA	sp|Q8GYD2|MND1_ARATH	190	3e-74	Meiotic nuclear division protein 1 homolog OS=Arabidopsis thaliana GN=MND1 PE=1 SV=1	SPAC13A11.03	98.2	4e-22	COG5124	Protein predicted to be involved in meiotic recombination	--	--	--	--	--	GO:0000278//mitotic cell cycle;GO:0031047//gene silencing by RNA;GO:0006312//mitotic recombination;GO:0010332//response to gamma radiation;GO:0006275//regulation of DNA replication;GO:0007131//reciprocal meiotic recombination;GO:0006261//DNA-dependent DNA replication;GO:0045132//meiotic chromosome segregation;GO:0000724//double-strand break repair via homologous recombination;GO:0042138//meiotic …	GO:0005515//protein binding	GO:0005634//nucleus	--
Unigene28271_All	414	2	20	0.2204	2.3557	3.41796	Up	3.4516e-05	0.000262301	gi|449442941|ref|XP_004139239.1|	226.1	1e-58	PREDICTED: pathogenesis-related protein P2-like [Cucumis sativus] >gi|449483008|ref|XP_004156468.1| PREDICTED: pathogenesis-related protein P2-like [Cucumis sativus]	gi|449442940|ref|XM_004139191.1|	202	2e-49	PREDICTED: Cucumis sativus pathogenesis-related protein P2-like (LOC101203717), mRNA >gi|449483007|ref|XM_004156420.1| PREDICTED: Cucumis sativus pathogenesis-related protein P2-like (LOC101203717), mRNA	sp|P32045|PRP2_SOLLC	202	7e-53	Pathogenesis-related protein P2 OS=Solanum lycopersicum PE=2 SV=1	--	--	--	--	--	--	--	--	--	--	GO:0050832//defense response to fungus;GO:0042742//defense response to bacterium	-	-	--
Unigene9058_All	399	5	50	0.5718	6.1108	3.41778	Up	2.45042e-11	4.3642e-10	gi|449528972|ref|XP_004171475.1|	246.5	9e-65	PREDICTED: lecithin-cholesterol acyltransferase-like 1-like [Cucumis sativus]	gi|449528971|ref|XM_004171427.1|	313	7e-83	PREDICTED: Cucumis sativus lecithin-cholesterol acyltransferase-like 1-like (LOC101212778), mRNA	sp|Q9FZI8|LCAT1_ARATH	195	6e-51	Lecithin-cholesterol acyltransferase-like 1 OS=Arabidopsis thaliana GN=LCAT1 PE=2 SV=1	--	--	--	--	--	K06129	5e-59	223	gmx:100804027	lysophospholipase III [EC:3.1.1.5]	GO:0006629//lipid metabolic process;GO:0016556//mRNA modification;GO:0030003//cellular cation homeostasis;GO:0070838//divalent metal ion transport	GO:0004607//phosphatidylcholine-sterol O-acyltransferase activity	GO:0005774//vacuolar membrane;GO:0005576//extracellular region;GO:0005886//plasma membrane	--
Unigene38254_All	216	2	20	0.4225	4.5152	3.41777	Up	3.4516e-05	0.000262389	--	--	--	--	--	--	--	--	--	--	--	--	--	--	--	--	--	--	--	--	--	--	-	-	-	--
Unigene15900_All	314	4	40	0.5813	6.212	3.4177	Up	2.65112e-09	3.87682e-08	--	--	--	--	--	--	--	--	--	--	--	--	--	--	--	--	--	--	--	--	--	--	-	-	-	--
CL5778.Contig2_All	1154	28	280	1.1072	11.8318	3.41768	Up	1.96041e-57	1.64191e-55	gi|449438179|ref|XP_004136867.1|	547	2e-154	PREDICTED: peroxidase N1-like [Cucumis sativus]	gi|449438178|ref|XM_004136819.1|	254	2e-64	PREDICTED: Cucumis sativus peroxidase N1-like (LOC101217567), mRNA	sp|Q9XIV8|PERN1_TOBAC	479	2e-135	Peroxidase N1 OS=Nicotiana tabacum GN=poxN1 PE=1 SV=1	--	--	--	--	--	K00430	2e-148	523	rcu:RCOM_1182920	peroxidase [EC:1.11.1.7]	GO:0006979//response to oxidative stress;GO:0050832//defense response to fungus;GO:0045730//respiratory burst;GO:0055114//oxidation-reduction process	GO:0046872//metal ion binding;GO:0020037//heme binding;GO:0004601//peroxidase activity	GO:0005618//cell wall;GO:0016020//membrane;GO:0048046//apoplast	--
Unigene19047_All	205	2	20	0.4452	4.7575	3.41768	Up	3.4516e-05	0.000262271	--	--	--	--	--	--	--	--	--	--	--	--	--	--	--	--	--	--	--	--	--	--	-	-	-	--
CL1046.Contig1_All	574	2	20	0.159	1.6991	3.41767	Up	3.4516e-05	0.000262242	gi|449530079|ref|XP_004172024.1|	241.5	6e-63	PREDICTED: linoleate 13S-lipoxygenase 2-1, chloroplastic-like [Cucumis sativus]	gi|449448963|ref|XM_004142187.1|	149	4e-33	PREDICTED: Cucumis sativus linoleate 13S-lipoxygenase 2-1, chloroplastic-like (LOC101214639), mRNA	sp|O24370|LOX21_SOLTU	189	7e-49	Linoleate 13S-lipoxygenase 2-1, chloroplastic OS=Solanum tuberosum GN=LOX2.1 PE=1 SV=1	--	--	--	--	--	K00454	9e-56	214	pop:POPTR_750772	lipoxygenase [EC:1.13.11.12]	GO:0050896//response to stimulus;GO:0006633//fatty acid biosynthetic process	GO:0046872//metal ion binding;GO:0016702//oxidoreductase activity, acting on single donors with incorporation of molecular oxygen, incorporation of two atoms of oxygen	GO:0044434	--
Unigene29056_All	265	2	20	0.3444	3.6803	3.41767	Up	3.4516e-05	0.000262448	--	--	--	--	--	--	--	--	--	--	--	--	--	--	--	--	--	--	--	--	--	--	-	-	-	--
CL400.Contig1_All	563	48	480	3.8906	41.5749	3.41765	Up	2.56786e-97	3.56384e-95	gi|449441298|ref|XP_004138419.1|	152.1	4e-36	PREDICTED: uncharacterized protein LOC101203137 [Cucumis sativus]	gi|449441297|ref|XM_004138371.1|	184	7e-44	PREDICTED: Cucumis sativus uncharacterized LOC101203137 (LOC101203137), mRNA	--	--	--	--	--	--	--	--	--	--	--	--	--	--	GO:0009414//response to water deprivation;GO:0009651//response to salt stress;GO:0050826//response to freezing;GO:0045893//positive regulation of transcription, DNA-dependent	-	-	--
Unigene39393_All	233	2	20	0.3917	4.1857	3.41765	Up	3.4516e-05	0.00026236	--	--	--	--	--	--	--	--	--	--	--	--	--	--	--	--	--	--	--	--	--	--	-	-	-	--
Unigene2322_All	232	3	30	0.5901	6.3057	3.41763	Up	2.95094e-07	3.32474e-06	--	--	--	--	--	--	--	--	--	--	--	--	--	--	--	--	--	--	--	--	--	--	-	-	-	--
Unigene39560_All	357	3	30	0.3835	4.0978	3.41755	Up	2.95094e-07	3.32529e-06	--	--	--	--	gi|449500127|ref|XM_004160964.1|	60	2e-06	PREDICTED: Cucumis sativus uncharacterized LOC101225990 (LOC101225990), mRNA	--	--	--	--	--	--	--	--	--	--	--	--	--	--	-	-	-	--
Unigene16200_All	330	2	20	0.2766	2.9554	3.41748	Up	3.4516e-05	0.000262419	gi|147833479|emb|CAN75186.1|	27.7	1e-06	hypothetical protein VITISV_001913 [Vitis vinifera]	--	--	--	--	--	--	--	--	--	--	--	--	--	--	--	--	--	--	-	-	-	--
Unigene19831_All	1380	4	40	0.1323	1.4134	3.41728	Up	2.65112e-09	3.87598e-08	gi|449459494|ref|XP_004147481.1|	703.4	0	PREDICTED: probable peptide/nitrate transporter At5g14940-like [Cucumis sativus]	gi|449515236|ref|XM_004164608.1|	547	1e-152	PREDICTED: Cucumis sativus probable peptide/nitrate transporter At5g14940-like (LOC101207604), partial mRNA	sp|Q9LFR1|PTR50_ARATH	496	1e-140	Probable peptide/nitrate transporter At5g14940 OS=Arabidopsis thaliana GN=At5g14940 PE=2 SV=1	ECU11g1050	94.4	4e-19	COG3104	Dipeptide/tripeptide permease	K14638	6e-73	273	mtr:MTR_4g015080	solute carrier family 15 (peptide/histidine transporter), member 3/4	GO:0006857//oligopeptide transport;GO:0009624//response to nematode	GO:0015171//amino acid transmembrane transporter activity	GO:0005886//plasma membrane	--
CL5894.Contig3_All	1666	2	20	0.0548	0.5854	3.41717	Up	3.4516e-05	0.00026233	gi|449452338|ref|XP_004143916.1|	111.3	0	PREDICTED: 4-coumarate--CoA ligase-like 10-like [Cucumis sativus] >gi|449495827|ref|XP_004159956.1| PREDICTED: 4-coumarate--CoA ligase-like 10-like [Cucumis sativus]	gi|449495826|ref|XM_004159908.1|	1170	0	PREDICTED: Cucumis sativus 4-coumarate--CoA ligase-like 10-like (LOC101225382), mRNA	sp|Q9SMT7|4CLLA_ARATH	675	0	4-coumarate--CoA ligase-like 10 OS=Arabidopsis thaliana GN=4CLL10 PE=2 SV=1	SPCC1827.03c	385	9e-107	COG0318	Acyl-CoA synthetases (AMP-forming)/AMP-acid ligases II	K01904	3e-52	185	gmx:100808944	4-coumarate--CoA ligase [EC:6.2.1.12]	GO:0015706//nitrate transport;GO:0010214//seed coat development;GO:0010167//response to nitrate;GO:0046482//para-aminobenzoic acid metabolic process;GO:0010030//positive regulation of seed germination;GO:0033611//oxalate catabolic process;GO:0046686//response to cadmium ion;GO:0050832//defense response to fungus	GO:0050203//oxalate-CoA ligase activity;GO:0008756//o-succinylbenzoate-CoA ligase activity;GO:0016208//AMP binding	GO:0005829//cytosol;GO:0005739//mitochondrion;GO:0009506//plasmodesma;GO:0009570//chloroplast stroma;GO:0048046//apoplast	--
Unigene3700_All	2840	480	4784	7.7126	82.1432	3.41285	Up	0	0	gi|449445624|ref|XP_004140572.1|	1688.3	0	PREDICTED: cellulose synthase A catalytic subunit 4 [UDP-forming]-like [Cucumis sativus] >gi|449487357|ref|XP_004157586.1| PREDICTED: cellulose synthase A catalytic subunit 4 [UDP-forming]-like [Cucumis sativus]	gi|449445623|ref|XM_004140524.1|	2908	0	PREDICTED: Cucumis sativus cellulose synthase A catalytic subunit 4 [UDP-forming]-like (LOC101205733), mRNA >gi|449487356|ref|XM_004157538.1| PREDICTED: Cucumis sativus cellulose synthase A catalytic subunit 4 [UDP-forming]-like (LOC101205733), mRNA	sp|Q84JA6|CESA4_ARATH	1531	0	Cellulose synthase A catalytic subunit 4 [UDP-forming] OS=Arabidopsis thaliana GN=CESA4 PE=1 SV=1	alr3757	89	4e-17	COG1215	Glycosyltransferases, probably involved in cell wall biogenesis	K10999	0	1635	vvi:100241197	cellulose synthase A [EC:2.4.1.12]	GO:0042742//defense response to bacterium;GO:0009834//secondary cell wall biogenesis;GO:0050832//defense response to fungus;GO:0030244//cellulose biosynthetic process	GO:0016760//cellulose synthase (UDP-forming) activity;GO:0008270//zinc ion binding	GO:0016021//integral to membrane	--
CL2499.Contig4_All	1322	14	138	0.4833	5.0903	3.39676	Up	6.71412e-29	2.96215e-27	gi|359478764|ref|XP_002278599.2|	314.7	2e-84	PREDICTED: uncharacterized protein LOC100260376 [Vitis vinifera]	gi|449450935|ref|XM_004143170.1|	139	8e-30	PREDICTED: Cucumis sativus uncharacterized LOC101206694 (LOC101206694), mRNA	sp|Q8RX71|BAG4_ARATH	200	2e-51	BAG family molecular chaperone regulator 4 OS=Arabidopsis thaliana GN=BAG4 PE=1 SV=1	--	--	--	--	--	--	--	--	--	--	-	-	-	--
Unigene8611_All	807	10	98	0.5655	5.9218	3.38844	Up	7.1151e-21	2.27916e-19	gi|225626259|gb|ACN97179.1|	226.5	3e-58	MYB transcription factor [Populus trichocarpa]	gi|449506705|ref|XM_004162777.1|	258	8e-66	PREDICTED: Cucumis sativus transcription factor MYB44-like (LOC101214705), mRNA	sp|Q9FDW1|MYB44_ARATH	105	3e-23	Transcription factor MYB44 OS=Arabidopsis thaliana GN=MYB44 PE=2 SV=1	ECU11g1690	95.9	7e-20	COG5147	Myb superfamily proteins, including transcription factors and mRNA splicing factors	K09422	3e-59	226	pop:POPTR_569401	myb proto-oncogene protein, plant	GO:0009737//response to abscisic acid stimulus;GO:2000652//regulation of secondary cell wall biogenesis	GO:0005488//binding	GO:0005634//nucleus	--
CL2941.Contig2_All	758	13	127	0.7826	8.1702	3.38402	Up	1.27498e-26	5.20691e-25	gi|449528674|ref|XP_004171328.1|	91.3	1e-17	PREDICTED: uncharacterized protein LOC101232333 [Cucumis sativus]	gi|449528673|ref|XM_004171280.1|	103	3e-19	PREDICTED: Cucumis sativus uncharacterized LOC101232333 (LOC101232333), mRNA	--	--	--	--	--	--	--	--	--	K11323	7e-08	55.8	vcn:VOLCADRAFT_121342	histone arginine demethylase JMJD6 [EC:1.14.11.-]	-	-	-	--
Unigene9441_All	250	4	39	0.7301	7.6072	3.3812	Up	5.00794e-09	7.11096e-08	gi|449452334|ref|XP_004143914.1|	156.4	1e-37	PREDICTED: putative copper-transporting ATPase HMA5-like [Cucumis sativus] >gi|449495821|ref|XP_004159954.1| PREDICTED: putative copper-transporting ATPase HMA5-like [Cucumis sativus]	gi|123694229|emb|AM438418.1|	127	6e-27	Vitis vinifera, whole genome shotgun sequence, contig VV78X148385.58, clone ENTAV 115	sp|Q9S7J8|HMA7_ARATH	94.7	1e-20	Copper-transporting ATPase RAN1 OS=Arabidopsis thaliana GN=RAN1 PE=1 SV=1	BS_yvgX	80.5	7e-16	COG2217	Cation transport ATPase	K01533	9e-33	136	ath:AT1G63440	Cu2+-exporting ATPase [EC:3.6.3.4]	GO:0060003//copper ion export;GO:0006754//ATP biosynthetic process;GO:0010043//response to zinc ion;GO:0010273//detoxification of copper ion	GO:0004008//copper-exporting ATPase activity;GO:0005507//copper ion binding;GO:0005524//ATP binding	GO:0016021//integral to membrane;GO:0005886//plasma membrane	--
CL4889.Contig3_All	1106	10	97	0.4126	4.2768	3.37372	Up	1.33817e-20	4.23038e-19	gi|449515983|ref|XP_004165027.1|	523.9	1e-147	PREDICTED: protein TRANSPARENT TESTA 12-like [Cucumis sativus]	gi|449515982|ref|XM_004164979.1|	452	1e-124	PREDICTED: Cucumis sativus protein TRANSPARENT TESTA 12-like (LOC101231329), mRNA	sp|Q9LYT3|TT12_ARATH	204	6e-53	Protein TRANSPARENT TESTA 12 OS=Arabidopsis thaliana GN=TT12 PE=2 SV=1	SPCC4B3.13	102	2e-21	COG0534	Na+-driven multidrug efflux pump	K03327	1e-114	410	aly:ARALYDRAFT_914011	multidrug resistance protein, MATE family	GO:0006855//drug transmembrane transport;GO:0009812//flavonoid metabolic process;GO:0009555//pollen development;GO:0009901//anther dehiscence	GO:0015238//drug transmembrane transporter activity;GO:0015297//antiporter activity	GO:0005774//vacuolar membrane;GO:0005886//plasma membrane	--
CL103.Contig9_All	475	50	484	4.8035	49.6879	3.37074	Up	6.39398e-97	8.81965e-95	gi|449482472|ref|XP_004156293.1|	263.8	7e-70	PREDICTED: LOW QUALITY PROTEIN: phenylalanine ammonia-lyase-like [Cucumis sativus]	gi|449482463|ref|XM_004156242.1|	400	1e-109	PREDICTED: Cucumis sativus phenylalanine ammonia-lyase-like (LOC101218856), mRNA	sp|P45732|PALY_STYHU	238	1e-63	Phenylalanine ammonia-lyase OS=Stylosanthes humilis GN=PAL17.1 PE=2 SV=1	--	--	--	--	--	K10775	8e-64	240	gmx:100803857	phenylalanine ammonia-lyase [EC:4.3.1.24]	GO:0009800//cinnamic acid biosynthetic process;GO:0006559//L-phenylalanine catabolic process	GO:0045548//phenylalanine ammonia-lyase activity	GO:0005737//cytoplasm	--
Unigene39954_All	423	3	29	0.3236	3.3432	3.36895	Up	5.58186e-07	5.97991e-06	--	--	--	--	--	--	--	--	--	--	--	--	--	--	--	--	--	--	--	--	--	--	-	-	-	--
Unigene32398_All	246	3	29	0.5565	5.7486	3.36876	Up	5.58186e-07	5.98086e-06	--	--	--	--	gi|151421141|dbj|AK252493.1|	58	4e-06	Hordeum vulgare subsp. vulgare cDNA clone: FLbaf152p06, mRNA sequence	--	--	--	--	--	--	--	--	--	--	--	--	--	--	-	-	-	--
Unigene2918_All	358	3	29	0.3824	3.9501	3.36873	Up	5.58186e-07	5.9818e-06	--	--	--	--	--	--	--	--	--	--	--	--	--	--	--	--	--	--	--	--	--	--	-	-	-	--
Unigene3431_All	3313	377	3638	5.1928	53.5476	3.36624	Up	0	0	gi|449500838|ref|XP_004161207.1|	1968.7	0	PREDICTED: LOW QUALITY PROTEIN: cellulose synthase A catalytic subunit 8 [UDP-forming]-like [Cucumis sativus]	gi|449500837|ref|XM_004161159.1|	4306	0	PREDICTED: Cucumis sativus cellulose synthase A catalytic subunit 8 [UDP-forming]-like (LOC101208988), mRNA	sp|Q8LPK5|CESA8_ARATH	1677	0	Cellulose synthase A catalytic subunit 8 [UDP-forming] OS=Arabidopsis thaliana GN=CESA8 PE=1 SV=1	alr3757	103	1e-21	COG1215	Glycosyltransferases, probably involved in cell wall biogenesis	K10999	0	1790	vvi:100261696	cellulose synthase A [EC:2.4.1.12]	GO:0030244//cellulose biosynthetic process	GO:0016760//cellulose synthase (UDP-forming) activity	GO:0016021//integral to membrane	--
CL4381.Contig1_All	1244	32	308	1.1738	12.0734	3.36257	Up	3.95022e-62	3.56464e-60	gi|449434875|ref|XP_004135221.1|	392.1	1e-107	PREDICTED: two-component response regulator ARR3-like [Cucumis sativus] >gi|449478516|ref|XP_004155339.1| PREDICTED: two-component response regulator ARR3-like [Cucumis sativus]	gi|449434874|ref|XM_004135173.1|	513	1e-142	PREDICTED: Cucumis sativus two-component response regulator ARR3-like (LOC101209506), mRNA	sp|Q9ZWS9|ARR3_ARATH	228	4e-60	Two-component response regulator ARR3 OS=Arabidopsis thaliana GN=ARR3 PE=2 SV=1	BH1547_2	69.3	1e-11	COG0784	FOG: CheY-like receiver	K14492	3e-68	257	rcu:RCOM_0699760	two-component response regulator ARR-A family	GO:0010114//response to red light;GO:0007623//circadian rhythm;GO:0044237//cellular metabolic process;GO:0010017//red or far-red light signaling pathway	-	GO:0044424//intracellular part	--
Unigene9589_All	503	5	48	0.4536	4.6534	3.35879	Up	8.71424e-11	1.48061e-09	gi|449523750|ref|XP_004168886.1|	90.5	1e-17	PREDICTED: LOW QUALITY PROTEIN: beta-fructofuranosidase, insoluble isoenzyme CWINV1-like, partial [Cucumis sativus]	gi|112383511|gb|DQ834314.1|	60	2e-06	Coffea canephora cell-wall invertase (Inv1) mRNA, complete cds	sp|Q43866|INV1_ARATH	66.6	7e-12	Beta-fructofuranosidase, insoluble isoenzyme CWINV1 OS=Arabidopsis thaliana GN=CWINV1 PE=1 SV=1	--	--	--	--	--	K01193	1e-12	70.9	aly:ARALYDRAFT_478781	beta-fructofuranosidase [EC:3.2.1.26]	GO:0009611//response to wounding;GO:0010200//response to chitin;GO:0002679//respiratory burst involved in defense response;GO:0015706//nitrate transport;GO:0006865//amino acid transport;GO:0010167//response to nitrate;GO:0080167//response to karrikin	GO:0004564//beta-fructofuranosidase activity	GO:0005886//plasma membrane;GO:0005618//cell wall;GO:0005576//extracellular region	--
Unigene24792_All	537	5	48	0.4249	4.3588	3.35874	Up	8.71424e-11	1.48098e-09	--	--	--	--	--	--	--	--	--	--	--	--	--	--	--	--	--	--	--	--	--	--	-	-	-	--
CL8514.Contig1_All	1165	108	1030	4.2304	43.1132	3.34926	Up	4.04332e-203	1.08446e-200	gi|449436978|ref|XP_004136269.1|	317.4	2e-85	PREDICTED: blue copper protein-like [Cucumis sativus] >gi|449530626|ref|XP_004172295.1| PREDICTED: blue copper protein-like [Cucumis sativus]	gi|449436977|ref|XM_004136221.1|	309	4e-81	PREDICTED: Cucumis sativus blue copper protein-like (LOC101208685), mRNA >gi|449530625|ref|XM_004172247.1| PREDICTED: Cucumis sativus blue copper protein-like (LOC101208685), mRNA	sp|Q41001|BCP_PEA	182	3e-46	Blue copper protein OS=Pisum sativum PE=2 SV=1	--	--	--	--	--	--	--	--	--	--	-	-	-	--
CL1054.Contig2_All	619	2	19	0.1474	1.4968	3.34407	Up	6.54538e-05	0.000464604	gi|449524348|ref|XP_004169185.1|	166.4	2e-40	PREDICTED: uncharacterized protein LOC101230305, partial [Cucumis sativus]	gi|449524347|ref|XM_004169137.1|	480	1e-133	PREDICTED: Cucumis sativus uncharacterized LOC101230305 (LOC101230305), partial mRNA	sp|Q8RWY6|CLASP_ARATH	145	2e-35	CLIP-associated protein OS=Arabidopsis thaliana GN=CLASP PE=1 SV=1	--	--	--	--	--	--	--	--	--	--	GO:0007067//mitosis;GO:0016049//cell growth;GO:0050821//protein stabilization	-	GO:0005886//plasma membrane;GO:0005876//spindle microtubule	--
Unigene15904_All	258	2	19	0.3537	3.5911	3.34383	Up	6.54538e-05	0.000464311	--	--	--	--	gi|157311792|gb|AC210334.1|	101	3e-19	Populus trichocarpa clone POP021-M21, complete sequence	--	--	--	--	--	--	--	--	--	--	--	--	--	--	-	-	-	--
Unigene32180_All	249	2	19	0.3665	3.7209	3.34377	Up	6.54538e-05	0.000464262	--	--	--	--	--	--	--	--	--	--	--	--	--	--	--	--	--	--	--	--	--	--	-	-	-	--
Unigene12382_All	321	2	19	0.2843	2.8863	3.34374	Up	6.54538e-05	0.000464506	--	--	--	--	--	--	--	--	--	--	--	--	--	--	--	--	--	--	--	--	--	--	-	-	-	--
Unigene39283_All	303	2	19	0.3012	3.0578	3.3437	Up	6.54538e-05	0.000464555	gi|224138984|ref|XP_002326739.1|	62.8	8e-32	predicted protein [Populus trichocarpa] >gi|222834061|gb|EEE72538.1| predicted protein [Populus trichocarpa]	gi|449526214|ref|XM_004170061.1|	373	1e-101	PREDICTED: Cucumis sativus cell cycle checkpoint protein RAD1-like (LOC101228523), mRNA	--	--	--	--	--	--	--	--	--	K02830	5e-33	95.5	pop:POPTR_826620	cell cycle checkpoint protein [EC:3.1.11.2]	GO:0006261//DNA-dependent DNA replication;GO:0000077//DNA damage checkpoint;GO:0006281//DNA repair	GO:0008853//exodeoxyribonuclease III activity;GO:0003684//damaged DNA binding	GO:0005634//nucleus	--
Unigene39532_All	283	2	19	0.3225	3.2739	3.34364	Up	6.54538e-05	0.000464653	gi|449448768|ref|XP_004142137.1|	66.6	1e-10	PREDICTED: linoleate 13S-lipoxygenase 2-1, chloroplastic-like [Cucumis sativus]	--	--	--	--	--	--	--	--	--	--	--	--	--	--	--	--	--	--	-	-	-	--
CL3369.Contig1_All	439	8	76	0.8316	8.442	3.34362	Up	2.65728e-16	6.6991e-15	--	--	--	--	--	--	--	--	--	--	--	--	--	--	--	--	--	--	--	--	--	--	-	-	-	--
Unigene39996_All	203	2	19	0.4496	4.5641	3.34362	Up	6.54538e-05	0.000464701	--	--	--	--	--	--	--	--	--	--	--	--	--	--	--	--	--	--	--	--	--	--	-	-	-	--
Unigene39862_All	204	2	19	0.4474	4.5417	3.3436	Up	6.54538e-05	0.000464214	--	--	--	--	--	--	--	--	--	--	--	--	--	--	--	--	--	--	--	--	--	--	-	-	-	--
Unigene39801_All	235	2	19	0.3884	3.9426	3.34353	Up	6.54538e-05	0.00046436	--	--	--	--	--	--	--	--	--	--	--	--	--	--	--	--	--	--	--	--	--	--	-	-	-	--
CL5822.Contig2_All	447	2	19	0.2042	2.0727	3.34346	Up	6.54538e-05	0.000464457	--	--	--	--	gi|449465772|ref|XM_004150554.1|	99.6	2e-18	PREDICTED: Cucumis sativus biotin--protein ligase-like (LOC101206408), mRNA	--	--	--	--	--	--	--	--	--	--	--	--	--	--	-	-	-	--
Unigene24897_All	309	2	19	0.2954	2.9984	3.34345	Up	6.54538e-05	0.000464409	gi|449526700|ref|XP_004170351.1|	201.8	2e-51	PREDICTED: copper-transporting ATPase PAA1, chloroplastic-like, partial [Cucumis sativus]	gi|449526699|ref|XM_004170303.1|	430	1e-118	PREDICTED: Cucumis sativus copper-transporting ATPase PAA1, chloroplastic-like (LOC101228600), partial mRNA	sp|Q9SZC9|HMA6_ARATH	147	1e-36	Copper-transporting ATPase PAA1, chloroplastic OS=Arabidopsis thaliana GN=PAA1 PE=2 SV=1	slr1950	52	3e-07	COG2217	Cation transport ATPase	--	--	--	--	--	GO:0060003//copper ion export;GO:0009767//photosynthetic electron transport chain;GO:0006511//ubiquitin-dependent protein catabolic process;GO:0006754//ATP biosynthetic process;GO:0010043//response to zinc ion	GO:0004298//threonine-type endopeptidase activity;GO:0004008//copper-exporting ATPase activity;GO:0046872//metal ion binding;GO:0005524//ATP binding	GO:0005774//vacuolar membrane;GO:0009941//chloroplast envelope;GO:0016021//integral to membrane;GO:0005829//cytosol;GO:0019773//proteasome core complex, alpha-subunit complex;GO:0009570//chloroplast stroma;GO:0005886//plasma membrane	--
Unigene4521_All	456	23	218	2.3017	23.3126	3.34034	Up	3.63544e-44	2.35812e-42	gi|356507036|ref|XP_003522277.1|	147.5	6e-35	PREDICTED: 17.9 kDa class II heat shock protein-like [Glycine max]	gi|403044042|ref|NM_001251031.2|	178	3e-42	Glycine max uncharacterized LOC100306126 (LOC100306126), mRNA	sp|P19242|HSP21_PEA	137	3e-33	17.1 kDa class II heat shock protein OS=Pisum sativum GN=HSP17.7 PE=2 SV=1	--	--	--	--	--	K13993	7e-36	147	gmx:100777239	HSP20 family protein	GO:0006950//response to stress	-	-	--
Unigene1597_All	568	28	265	2.2495	22.7508	3.33824	Up	2.48898e-53	1.93588e-51	--	--	--	--	--	--	--	--	--	--	--	--	--	--	--	--	--	--	--	--	--	--	-	-	-	--
CL5706.Contig3_All	1197	90	848	3.4311	34.5462	3.33178	Up	9.365e-167	2.06853e-164	gi|449453322|ref|XP_004144407.1|	518.9	7e-146	PREDICTED: isoflavone reductase homolog [Cucumis sativus]	gi|449522031|ref|XM_004167984.1|	375	1e-101	PREDICTED: Cucumis sativus isoflavone reductase homolog (LOC101224884), mRNA	sp|P52581|IFRH_LUPAL	499	2e-141	Isoflavone reductase homolog OS=Lupinus albus PE=2 SV=1	slr0399	63.2	9e-10	COG0702	Predicted nucleoside-diphosphate-sugar epimerases	K00224	3e-122	436	aly:ARALYDRAFT_658933	[EC:1.3.1.-]	GO:0009807//lignan biosynthetic process;GO:0055114//oxidation-reduction process	GO:0047526;GO:0000166//nucleotide binding	-	--
CL7902.Contig1_All	1972	10	94	0.2314	2.3244	3.3284	Up	8.8529e-20	2.69531e-18	gi|460386510|ref|XP_004238941.1|	121.3	1e-74	PREDICTED: uncharacterized protein LOC101258366 [Solanum lycopersicum]	gi|460386509|ref|XM_004238893.1|	61.9	2e-06	PREDICTED: Solanum lycopersicum uncharacterized LOC101258366 (LOC101258366), mRNA	--	--	--	--	--	--	--	--	--	K03453	6e-11	67.8	vcn:VOLCADRAFT_102664	bile acid:Na+ symporter, BASS family	GO:0006950//response to stress	-	GO:0005737//cytoplasm	--
Unigene10606_All	1650	187	1757	5.1717	51.9262	3.32775	Up	0	0	gi|449447661|ref|XP_004141586.1|	750.7	0	PREDICTED: malonyl-CoA:anthocyanidin 5-O-glucoside-6&quot;-O-malonyltransferase-like [Cucumis sativus] >gi|449481542|ref|XP_004156213.1| PREDICTED: malonyl-CoA:anthocyanidin 5-O-glucoside-6&quot;-O-malonyltransferase-like [Cucumis sativus]	gi|449447660|ref|XM_004141538.1|	630	1e-177	PREDICTED: Cucumis sativus malonyl-CoA:anthocyanidin 5-O-glucoside-6"-O-malonyltransferase-like (LOC101214879), mRNA >gi|449481541|ref|XM_004156165.1| PREDICTED: Cucumis sativus malonyl-CoA:anthocyanidin 5-O-glucoside-6"-O-malonyltransferase-like (LOC101214879), mRNA	sp|Q940Z5|PMAT1_ARATH	325	5e-89	Phenolic glucoside malonyltransferase 1 OS=Arabidopsis thaliana GN=PMAT1 PE=1 SV=1	--	--	--	--	--	K14329	6e-62	236	ath:AT5G61160	agmatine coumaroyltransferase [EC:2.3.1.64 2.3.1.-]	-	GO:0016740//transferase activity	-	--
Unigene36773_All	321	3	28	0.4265	4.2536	3.31807	Up	1.05294e-06	1.07797e-05	--	--	--	--	--	--	--	--	--	--	--	--	--	--	--	--	--	--	--	--	--	--	-	-	-	--
Unigene32067_All	346	3	28	0.3957	3.9462	3.31799	Up	1.05294e-06	1.07813e-05	--	--	--	--	--	--	--	--	--	--	--	--	--	--	--	--	--	--	--	--	--	--	-	-	-	--
Unigene28967_All	346	3	28	0.3957	3.9462	3.31799	Up	1.05294e-06	1.0778e-05	gi|388827907|gb|AFK79036.1|	97.4	7e-20	glycosyltransferase UGT4 [Bupleurum chinense]	--	--	--	--	sp|Q5NTH0|UGAT_BELPE	85.1	8e-18	Cyanidin-3-O-glucoside 2-O-glucuronosyltransferase OS=Bellis perennis GN=UGAT PE=1 SV=1	--	--	--	--	--	K13692	3e-07	51.6	ath:AT2G23250	UDP-glucose:(indol-3-yl)acetate beta-D-glucosyltransferase [EC:2.4.1.121]	-	GO:0016740//transferase activity	-	--
Unigene10515_All	1580	37	345	1.0686	10.6478	3.31676	Up	1.4693e-68	1.46042e-66	gi|449479423|ref|XP_004155595.1|	815.8	0	PREDICTED: pectinesterase/pectinesterase inhibitor-like [Cucumis sativus]	gi|449433935|ref|XM_004134704.1|	957	0	PREDICTED: Cucumis sativus pectinesterase/pectinesterase inhibitor-like (LOC101216377), mRNA	sp|P83947|PME1_FICPW	614	5e-176	Pectinesterase/pectinesterase inhibitor OS=Ficus pumila var. awkeotsang PE=1 SV=1	CAC3373	160	4e-39	COG4677	Pectin methylesterase	K01051	0	657	pop:POPTR_822767	pectinesterase [EC:3.1.1.11]	GO:0044699;GO:0008152//metabolic process	GO:0016788//hydrolase activity, acting on ester bonds	GO:0071944//cell periphery	--
Unigene39599_All	296	7	65	1.0792	10.7083	3.3107	Up	5.1779e-14	1.1282e-12	gi|449466211|ref|XP_004150820.1|	97.8	5e-20	PREDICTED: transcription factor RADIALIS-like [Cucumis sativus] >gi|449517693|ref|XP_004165879.1| PREDICTED: transcription factor RADIALIS-like [Cucumis sativus]	gi|449517692|ref|XM_004165831.1|	176	8e-42	PREDICTED: Cucumis sativus transcription factor RADIALIS-like (LOC101203352), mRNA	sp|Q58FS3|RAD_ANTMA	75.9	5e-15	Transcription factor RADIALIS OS=Antirrhinum majus GN=RAD PE=1 SV=1	--	--	--	--	--	--	--	--	--	--	GO:0009793//embryo development ending in seed dormancy;GO:0009630//gravitropism;GO:0010114//response to red light	GO:0003677//DNA binding;GO:0003682//chromatin binding	GO:0005634//nucleus	--
Unigene39517_All	226	4	37	0.8077	7.9835	3.30513	Up	1.77556e-08	2.36469e-07	gi|224150733|ref|XP_002337002.1|	88.2	4e-17	predicted protein [Populus trichocarpa] >gi|222837555|gb|EEE75920.1| predicted protein [Populus trichocarpa]	gi|297853141|ref|XM_002894406.1|	65.9	2e-08	Arabidopsis lyrata subsp. lyrata expressed protein, mRNA	sp|Q6H7U3|FH10_ORYSJ	67.8	1e-12	Formin-like protein 10 OS=Oryza sativa subsp. japonica GN=FH10 PE=2 SV=1	CC3494_1	62	3e-10	COG3637	Opacity protein and related surface antigens	K06640	1e-09	59.7	vcn:VOLCADRAFT_88866	serine/threonine-protein kinase ATR [EC:2.7.11.1]	-	GO:0005488//binding	-	--
Unigene13702_All	1378	39	360	1.2915	12.7395	3.30219	Up	3.45614e-71	3.56093e-69	gi|449462413|ref|XP_004148935.1|	415.2	1e-114	PREDICTED: uncharacterized protein LOC101215865 [Cucumis sativus] >gi|449506415|ref|XP_004162743.1| PREDICTED: uncharacterized LOC101215865 [Cucumis sativus]	gi|449462412|ref|XM_004148887.1|	278	1e-71	PREDICTED: Cucumis sativus uncharacterized LOC101215865 (LOC101215865), mRNA >gi|449506414|ref|XM_004162695.1| PREDICTED: Cucumis sativus uncharacterized LOC101215865 (LOC101215865), mRNA	sp|A2ZVY5|C3H9_ORYSJ	53.5	3e-07	Zinc finger CCCH domain-containing protein 9 OS=Oryza sativa subsp. japonica GN=Os01g0645000 PE=2 SV=1	SPBC1718.07c	61.6	3e-09	COG5063	CCCH-type Zn-finger protein	--	--	--	--	--	-	GO:0005488//binding	-	--
Unigene19090_All	293	5	46	0.7787	7.6558	3.29741	Up	3.07706e-10	4.99221e-09	gi|449452334|ref|XP_004143914.1|	169.1	1e-41	PREDICTED: putative copper-transporting ATPase HMA5-like [Cucumis sativus] >gi|449495821|ref|XP_004159954.1| PREDICTED: putative copper-transporting ATPase HMA5-like [Cucumis sativus]	gi|449452333|ref|XM_004143866.1|	254	4e-65	PREDICTED: Cucumis sativus putative copper-transporting ATPase HMA5-like (LOC101220448), mRNA >gi|449495820|ref|XM_004159906.1| PREDICTED: Cucumis sativus putative copper-transporting ATPase HMA5-like (LOC101224926), mRNA	sp|Q9S7J8|HMA7_ARATH	62.4	6e-11	Copper-transporting ATPase RAN1 OS=Arabidopsis thaliana GN=RAN1 PE=1 SV=1	SA2344	57.8	5e-09	COG2217	Cation transport ATPase	K01533	6e-29	123	vvi:100259857	Cu2+-exporting ATPase [EC:3.6.3.4]	GO:0046034//ATP metabolic process;GO:0010043//response to zinc ion;GO:0010273//detoxification of copper ion;GO:0006825//copper ion transport	GO:0000166//nucleotide binding;GO:0046872//metal ion binding;GO:0043682//copper-transporting ATPase activity	GO:0005886//plasma membrane	--
CL2590.Contig1_All	213	5	46	1.0712	10.5312	3.29737	Up	3.07706e-10	4.99461e-09	gi|343466205|gb|AEM42996.1|	84.3	6e-16	S-RNase [Siraitia grosvenorii]	--	--	--	--	sp|O80324|RNS6_PYRPY	57	2e-09	Ribonuclease S-6 OS=Pyrus pyrifolia PE=1 SV=1	--	--	--	--	--	--	--	--	--	--	-	-	-	--
Unigene28114_All	563	5	46	0.4053	3.9843	3.29726	Up	3.07706e-10	4.99341e-09	--	--	--	--	--	--	--	--	--	--	--	--	--	--	--	--	--	--	--	--	--	--	-	-	-	--
Unigene219_All	1699	177	1625	4.754	46.64	3.29435	Up	0	0	gi|449440075|ref|XP_004137810.1|	543.1	5e-153	PREDICTED: probable beta-1,4-xylosyltransferase IRX9-like [Cucumis sativus]	gi|449440074|ref|XM_004137762.1|	662	0	PREDICTED: Cucumis sativus probable beta-1,4-xylosyltransferase IRX9-like (LOC101214465), mRNA	sp|Q9ZQC6|IRX9_ARATH	399	3e-111	Probable beta-1,4-xylosyltransferase IRX9 OS=Arabidopsis thaliana GN=IRX9 PE=2 SV=1	--	--	--	--	--	--	--	--	--	--	GO:0009834//secondary cell wall biogenesis;GO:0010417//glucuronoxylan biosynthetic process	GO:0042285//xylosyltransferase activity	GO:0005794//Golgi apparatus	--
CL2257.Contig4_All	1734	25	227	0.6579	6.3837	3.27845	Up	3.59974e-45	2.37833e-43	gi|225445937|ref|XP_002263999.1|	40.8	2e-75	PREDICTED: transcription factor bHLH35 [Vitis vinifera] >gi|297735470|emb|CBI17910.3| unnamed protein product [Vitis vinifera]	gi|449516624|ref|XM_004165299.1|	141	3e-30	PREDICTED: Cucumis sativus transcription factor bHLH35-like (LOC101229249), partial mRNA	sp|Q2HIV9|BH035_ARATH	218	9e-57	Transcription factor bHLH35 OS=Arabidopsis thaliana GN=BHLH35 PE=2 SV=1	--	--	--	--	--	K13422	2e-16	85.9	ppp:PHYPADRAFT_164647	transcription factor MYC2	GO:0009753//response to jasmonic acid stimulus;GO:0009694//jasmonic acid metabolic process;GO:0006355//regulation of transcription, DNA-dependent	GO:0003677//DNA binding;GO:0016491//oxidoreductase activity;GO:0046983//protein dimerization activity;GO:0003700//sequence-specific DNA binding transcription factor activity	GO:0005634//nucleus	--
CL4873.Contig3_All	664	14	127	0.9621	9.3268	3.27712	Up	6.73374e-26	2.66312e-24	gi|449460165|ref|XP_004147816.1|	252.3	4e-66	PREDICTED: probable galacturonosyltransferase-like 1-like [Cucumis sativus] >gi|449477010|ref|XP_004154902.1| PREDICTED: probable galacturonosyltransferase-like 1-like [Cucumis sativus]	gi|449477009|ref|XM_004154854.1|	208	5e-51	PREDICTED: Cucumis sativus probable galacturonosyltransferase-like 1-like (LOC101230327), mRNA	sp|Q9LN68|GATL1_ARATH	229	8e-61	Probable galacturonosyltransferase-like 1 OS=Arabidopsis thaliana GN=GATL1 PE=2 SV=1	--	--	--	--	--	K13648	5e-12	69.3	sbi:SORBI_05g022970	alpha-1,4-galacturonosyltransferase [EC:2.4.1.43]	GO:0032504//multicellular organism reproduction;GO:0010417//glucuronoxylan biosynthetic process;GO:0052386//cell wall thickening;GO:0010051//xylem and phloem pattern formation;GO:0048366//leaf development	GO:0016757//transferase activity, transferring glycosyl groups	GO:0005783//endoplasmic reticulum	--
Unigene21637_All	226	66	597	13.3265	128.814	3.27292	Up	5.19182e-116	8.62187e-114	gi|449532296|ref|XP_004173118.1|	123.2	1e-27	PREDICTED: cinnamoyl-CoA reductase 2-like [Cucumis sativus]	gi|449532295|ref|XM_004173070.1|	198	2e-48	PREDICTED: Cucumis sativus cinnamoyl-CoA reductase 2-like (LOC101232412), mRNA	sp|Q9SAH9|CCR2_ARATH	97.1	2e-21	Cinnamoyl-CoA reductase 2 OS=Arabidopsis thaliana GN=CCR2 PE=1 SV=1	--	--	--	--	--	K09753	2e-23	105	pop:POPTR_787395	cinnamoyl-CoA reductase [EC:1.2.1.44]	GO:0006694//steroid biosynthetic process;GO:0009409//response to cold;GO:0009809//lignin biosynthetic process;GO:0055114//oxidation-reduction process	GO:0016621//cinnamoyl-CoA reductase activity;GO:0003854//3-beta-hydroxy-delta5-steroid dehydrogenase activity;GO:0050662//coenzyme binding;GO:0000166//nucleotide binding	-	--
Unigene39874_All	244	2	18	0.374	3.5973	3.2658	Up	0.000123634	0.000814613	--	--	--	--	--	--	--	--	--	--	--	--	--	--	--	--	--	--	--	--	--	--	-	-	-	--
Unigene39314_All	226	2	18	0.4038	3.8839	3.26579	Up	0.000123634	0.000814454	gi|449520199|ref|XP_004167121.1|	109	2e-23	PREDICTED: LOW QUALITY PROTEIN: uncharacterized LOC101212417, partial [Cucumis sativus]	gi|449520198|ref|XM_004167073.1|	165	2e-38	PREDICTED: Cucumis sativus uncharacterized LOC101212417 (LOC101212417), partial mRNA	--	--	--	--	--	--	--	--	--	--	--	--	--	--	GO:0010090//trichome morphogenesis;GO:0071555//cell wall organization;GO:0007155//cell adhesion;GO:0048765//root hair cell differentiation;GO:0045010//actin nucleation	GO:0005543//phospholipid binding	GO:0009506//plasmodesma;GO:0005773//vacuole;GO:0005794//Golgi apparatus;GO:0005886//plasma membrane	--
CL6455.Contig2_All	396	4	36	0.4609	4.4331	3.26579	Up	3.33188e-08	4.2789e-07	--	--	--	--	--	--	--	--	--	--	--	--	--	--	--	--	--	--	--	--	--	--	-	-	-	--
Unigene12966_All	249	2	18	0.3665	3.5251	3.26578	Up	0.000123634	0.000815328	gi|449468642|ref|XP_004152030.1|	21.2	4e-18	PREDICTED: pentatricopeptide repeat-containing protein At4g04790, mitochondrial-like [Cucumis sativus]	gi|449509188|ref|XM_004163472.1|	75.8	2e-11	PREDICTED: Cucumis sativus pentatricopeptide repeat-containing protein At4g04790, mitochondrial-like (LOC101212593), mRNA	--	--	--	--	--	--	--	--	--	--	--	--	--	--	-	-	-	--
Unigene15222_All	936	12	108	0.585	5.6266	3.26575	Up	3.66706e-22	1.25559e-20	gi|462421855|gb|EMJ26118.1|	99.8	7e-20	hypothetical protein PRUPE_ppa021848mg [Prunus persica]	--	--	--	--	--	--	--	--	--	--	--	--	--	--	--	--	--	--	-	-	-	--
CL2626.Contig2_All	310	6	54	0.8832	8.4944	3.2657	Up	1.01622e-11	1.87153e-10	gi|449524116|ref|XP_004169069.1|	146	1e-34	PREDICTED: zeatin O-glucosyltransferase-like [Cucumis sativus]	--	--	--	--	sp|P56725|ZOX_PHAVU	121	1e-28	Zeatin O-xylosyltransferase OS=Phaseolus vulgaris GN=ZOX1 PE=2 SV=1	--	--	--	--	--	K13495	3e-32	134	vvi:100262460	cis-zeatin O-glucosyltransferase [EC:2.4.1.215]	-	GO:0016758//transferase activity, transferring hexosyl groups	-	--
Unigene6262_All	575	5	45	0.3968	3.8163	3.26569	Up	5.7658e-10	9.101e-09	gi|255544572|ref|XP_002513347.1|	178.3	6e-44	(S)-N-methylcoclaurine 3&apos;-hydroxylase isozyme, putative [Ricinus communis] >gi|223547255|gb|EEF48750.1| (S)-N-methylcoclaurine 3&apos;-hydroxylase isozyme, putative [Ricinus communis]	--	--	--	--	sp|Q9FXW4|C80B2_COPJA	154	4e-38	Probable (S)-N-methylcoclaurine 3'-hydroxylase isozyme 2 OS=Coptis japonica GN=CYP80B2 PE=2 SV=1	--	--	--	--	--	K00517	1e-20	97.4	ath:AT3G52970	[EC:1.14.-.-]	-	GO:0046872//metal ion binding;GO:0016705//oxidoreductase activity, acting on paired donors, with incorporation or reduction of molecular oxygen;GO:0004497//monooxygenase activity	-	--
Unigene12845_All	230	2	18	0.3968	3.8163	3.26569	Up	0.000123634	0.000814772	--	--	--	--	--	--	--	--	--	--	--	--	--	--	--	--	--	--	--	--	--	--	-	-	-	--
Unigene17321_All	603	37	333	2.8	26.9293	3.26568	Up	2.62616e-65	2.48251e-63	gi|357510995|ref|XP_003625786.1|	120.2	2e-26	hypothetical protein MTR_7g104250 [Medicago truncatula] >gi|355500801|gb|AES82004.1| hypothetical protein MTR_7g104250 [Medicago truncatula]	gi|56744300|gb|AC154034.1|	131	9e-28	Medicago truncatula chromosome 7 BAC clone mth2-71n23, complete sequence	--	--	--	--	--	--	--	--	--	--	--	--	--	--	GO:0016998//cell wall macromolecule catabolic process	-	-	--
Unigene39626_All	321	5	45	0.7108	6.8361	3.26566	Up	5.7658e-10	9.09887e-09	--	--	--	--	--	--	--	--	--	--	--	--	--	--	--	--	--	--	--	--	--	--	-	-	-	--
Unigene5744_All	215	2	18	0.4245	4.0826	3.26565	Up	0.000123634	0.00081509	gi|449496961|ref|XP_004160275.1|	143.7	8e-34	PREDICTED: putative beta-glucosidase 41-like [Cucumis sativus]	gi|356517256|ref|XM_003527257.1|	61.9	2e-07	PREDICTED: Glycine max beta-glucosidase 25-like (LOC100783543), mRNA	sp|Q0DA21|BGL25_ORYSJ	110	2e-25	Beta-glucosidase 25 OS=Oryza sativa subsp. japonica GN=BGLU25 PE=2 SV=2	--	--	--	--	--	K01188	7e-22	100	rcu:RCOM_1621030	beta-glucosidase [EC:3.2.1.21]	GO:0005975//carbohydrate metabolic process	GO:0008422//beta-glucosidase activity;GO:0043169//cation binding	GO:0005576//extracellular region;GO:0009505//plant-type cell wall	--
Unigene12791_All	232	2	18	0.3934	3.7834	3.26561	Up	0.000123634	0.000815249	--	--	--	--	--	--	--	--	--	--	--	--	--	--	--	--	--	--	--	--	--	--	-	-	-	--
Unigene28704_All	232	2	18	0.3934	3.7834	3.26561	Up	0.000123634	0.000814851	--	--	--	--	--	--	--	--	--	--	--	--	--	--	--	--	--	--	--	--	--	--	-	-	-	--
Unigene3020_All	277	2	18	0.3295	3.1688	3.26559	Up	0.000123634	0.000814375	--	--	--	--	--	--	--	--	--	--	--	--	--	--	--	--	--	--	--	--	--	--	-	-	-	--
CL4439.Contig2_All	217	2	18	0.4206	4.0449	3.26558	Up	0.000123634	0.000814931	gi|449476930|ref|XP_004154879.1|	80.5	8e-15	PREDICTED: probable LRR receptor-like serine/threonine-protein kinase At1g51810-like [Cucumis sativus]	--	--	--	--	--	--	--	--	--	--	--	--	--	--	--	--	--	--	-	-	-	--
Unigene11879_All	340	4	36	0.5369	5.1632	3.26554	Up	3.33188e-08	4.27971e-07	--	--	--	--	--	--	--	--	--	--	--	--	--	--	--	--	--	--	--	--	--	--	-	-	-	--
Unigene12656_All	227	2	18	0.4021	3.8667	3.26548	Up	0.000123634	0.00081501	--	--	--	--	--	--	--	--	--	--	--	--	--	--	--	--	--	--	--	--	--	--	-	-	-	--
Unigene21694_All	366	2	18	0.2494	2.3982	3.26542	Up	0.000123634	0.000815169	gi|449459672|ref|XP_004147570.1|	141	5e-33	PREDICTED: uncharacterized protein At4g22758-like [Cucumis sativus] >gi|449529848|ref|XP_004171910.1| PREDICTED: uncharacterized protein At4g22758-like [Cucumis sativus]	gi|449459671|ref|XM_004147522.1|	69.9	2e-09	PREDICTED: Cucumis sativus uncharacterized LOC101210947 (LOC101210947), mRNA >gi|449529847|ref|XM_004171862.1| PREDICTED: Cucumis sativus uncharacterized LOC101210947 (LOC101210947), mRNA	--	--	--	--	--	--	--	--	--	--	--	--	--	--	-	-	-	--
Unigene31627_All	948	2	18	0.0963	0.9259	3.26525	Up	0.000123634	0.000814692	gi|449456693|ref|XP_004146083.1|	90.1	5e-17	PREDICTED: probable LRR receptor-like serine/threonine-protein kinase At1g53440-like [Cucumis sativus] >gi|449521066|ref|XP_004167552.1| PREDICTED: probable LRR receptor-like serine/threonine-protein kinase At1g53440-like [Cucumis sativus]	gi|449456692|ref|XM_004146035.1|	436	1e-119	PREDICTED: Cucumis sativus probable LRR receptor-like serine/threonine-protein kinase At1g53440-like (LOC101222014), mRNA >gi|449521065|ref|XM_004167504.1| PREDICTED: Cucumis sativus probable LRR receptor-like serine/threonine-protein kinase At1g53440-like (LOC101225174), mRNA	sp|C0LGG9|Y5344_ARATH	247	8e-66	Probable LRR receptor-like serine/threonine-protein kinase At1g53440 OS=Arabidopsis thaliana GN=At1g53440 PE=1 SV=2	alr0124_1	71.2	2e-12	COG4886	Leucine-rich repeat (LRR) protein	K08286	1e-39	161	aly:ARALYDRAFT_491919	protein-serine/threonine kinase [EC:2.7.11.-]	GO:0006468//protein phosphorylation	GO:0005524//ATP binding;GO:0004674//protein serine/threonine kinase activity	-	--
CL394.Contig12_All	2462	2	18	0.0371	0.3565	3.26441	Up	0.000123634	0.000814533	gi|449505884|ref|XP_004162594.1|	1102.4	0	PREDICTED: E3 UFM1-protein ligase 1 homolog [Cucumis sativus]	gi|449505883|ref|XM_004162546.1|	2514	0	PREDICTED: Cucumis sativus uncharacterized LOC101208187 (LOC101208187), mRNA	sp|Q9LX73|UFL1_ARATH	730	0	E3 UFM1-protein ligase 1 homolog OS=Arabidopsis thaliana GN=At3g46220 PE=2 SV=1	--	--	--	--	--	--	--	--	--	--	GO:0045492//xylan biosynthetic process;GO:0010413//glucuronoxylan metabolic process	-	-	--
Unigene9264_All	747	8	71	0.4887	4.6349	3.24552	Up	6.1058e-15	1.41816e-13	gi|225449412|ref|XP_002282815.1|	319.7	2e-86	PREDICTED: laccase-17 [Vitis vinifera]	gi|356566453|ref|XM_003551398.1|	127	2e-26	PREDICTED: Glycine max uncharacterized protein LOC100819074 (LOC100819074), mRNA	sp|Q9FJD5|LAC17_ARATH	294	4e-80	Laccase-17 OS=Arabidopsis thaliana GN=LAC17 PE=2 SV=1	SPAC1F7.08	79.3	6e-15	COG2132	Putative multicopper oxidases	K00423	9e-26	115	ppp:PHYPADRAFT_163787	L-ascorbate oxidase [EC:1.10.3.3]	GO:0009414//response to water deprivation;GO:0046274//lignin catabolic process;GO:0055114//oxidation-reduction process	GO:0005507//copper ion binding;GO:0052716//hydroquinone:oxygen oxidoreductase activity	GO:0048046//apoplast	--
Unigene39496_All	360	5	44	0.6338	5.96	3.23321	Up	1.07824e-09	1.65857e-08	--	--	--	--	--	--	--	--	--	--	--	--	--	--	--	--	--	--	--	--	--	--	-	-	-	--
CL760.Contig1_All	1444	233	2049	7.3632	69.1948	3.23226	Up	0	0	gi|449503856|ref|XP_004162209.1|	627.5	1e-178	PREDICTED: chitinase-like protein 2-like [Cucumis sativus]	gi|449503855|ref|XM_004162161.1|	1072	0	PREDICTED: Cucumis sativus chitinase-like protein 2-like (LOC101225773), mRNA	sp|Q9LSP9|CTL2_ARATH	554	5e-158	Chitinase-like protein 2 OS=Arabidopsis thaliana GN=CTL2 PE=2 SV=1	STM0233	71.6	3e-12	COG3979	Uncharacterized protein contain chitin-binding domain type 3	K01183	4e-51	200	mtr:MTR_3g118390	chitinase [EC:3.2.1.14]	GO:0010413//glucuronoxylan metabolic process;GO:0016926//protein desumoylation;GO:0006032//chitin catabolic process;GO:0016998//cell wall macromolecule catabolic process;GO:0009651//response to salt stress;GO:0009408//response to heat;GO:0010228//vegetative to reproductive phase transition of meristem;GO:0045492//xylan biosynthetic process;GO:0009809//lignin biosynthetic process;GO:0050665//hydro…	GO:0004568//chitinase activity	GO:0005576//extracellular region;GO:0005886//plasma membrane	--
CL7989.Contig2_All	1651	70	613	1.9348	18.1056	3.22618	Up	1.6997e-117	2.87202e-115	gi|449484890|ref|XP_004157009.1|	844.3	0	PREDICTED: probable beta-1,4-xylosyltransferase IRX10-like [Cucumis sativus]	gi|449484889|ref|XM_004156961.1|	1645	0	PREDICTED: Cucumis sativus probable beta-1,4-xylosyltransferase IRX10-like (LOC101204172), mRNA	sp|Q9FZJ1|IRX10_ARATH	755	0	Probable beta-1,4-xylosyltransferase IRX10 OS=Arabidopsis thaliana GN=IRX10 PE=2 SV=1	--	--	--	--	--	--	--	--	--	--	GO:0010417//glucuronoxylan biosynthetic process;GO:0009834//secondary cell wall biogenesis	GO:0080116//glucuronoxylan glucuronosyltransferase activity	GO:0005794//Golgi apparatus;GO:0016020//membrane	--
Unigene17194_All	677	8	70	0.5392	5.0421	3.22513	Up	1.13849e-14	2.59701e-13	gi|449459292|ref|XP_004147380.1|	277.7	1e-73	PREDICTED: RING-H2 finger protein ATL78-like [Cucumis sativus] >gi|449526275|ref|XP_004170139.1| PREDICTED: RING-H2 finger protein ATL78-like [Cucumis sativus]	gi|449526274|ref|XM_004170091.1|	111	1e-21	PREDICTED: Cucumis sativus RING-H2 finger protein ATL78-like (LOC101222580), mRNA	sp|Q6NQG7|ATL78_ARATH	221	2e-58	RING-H2 finger protein ATL78 OS=Arabidopsis thaliana GN=ATL78 PE=2 SV=1	ECU07g0330	61.6	1e-09	COG5540	RING-finger-containing ubiquitin ligase	K05283	6e-15	79	aly:ARALYDRAFT_354960	phosphatidylinositol glycan, class W [EC:2.3.-.-]	-	GO:0046872//metal ion binding	-	--
CL5767.Contig4_All	455	207	1804	20.7605	193.341	3.21923	Up	0	0	gi|449518163|ref|XP_004166113.1|	299.7	1e-80	PREDICTED: LOW QUALITY PROTEIN: adenosylhomocysteinase-like [Cucumis sativus]	gi|449518162|ref|XM_004166065.1|	648	0	PREDICTED: Cucumis sativus adenosylhomocysteinase-like (LOC101209658), mRNA	sp|P50246|SAHH_MEDSA	285	1e-77	Adenosylhomocysteinase OS=Medicago sativa GN=SAHH PE=2 SV=1	CC0257	225	2e-59	COG0499	S-adenosylhomocysteine hydrolase	K01251	2e-78	288	pop:POPTR_597072	adenosylhomocysteinase [EC:3.3.1.1]	GO:0051788//response to misfolded protein;GO:0009853//photorespiration;GO:0006094//gluconeogenesis;GO:0006346//methylation-dependent chromatin silencing;GO:0006833//water transport;GO:0009793//embryo development ending in seed dormancy;GO:0051049//regulation of transport;GO:0009651//response to salt stress;GO:0080129//proteasome core complex assembly;GO:0048767//root hair elongation;GO:0006972//h…	GO:0000166//nucleotide binding;GO:0004013//adenosylhomocysteinase activity;GO:0005507//copper ion binding	GO:0005774//vacuolar membrane;GO:0048046//apoplast;GO:0005794//Golgi apparatus;GO:0005829//cytosol;GO:0009506//plasmodesma;GO:0005886//plasma membrane	--
Unigene4669_All	272	28	243	4.6975	43.5648	3.2132	Up	2.24416e-47	1.57672e-45	--	--	--	--	--	--	--	--	--	--	--	--	--	--	--	--	--	--	--	--	--	--	-	-	-	--
CL2672.Contig2_All	2190	3	26	0.0625	0.5789	3.21139	Up	3.71344e-06	3.44763e-05	gi|449439703|ref|XP_004137625.1|	89.7	0	PREDICTED: uncharacterized protein LOC101209024 [Cucumis sativus]	gi|449439702|ref|XM_004137577.1|	2288	0	PREDICTED: Cucumis sativus uncharacterized LOC101209024 (LOC101209024), mRNA	sp|Q9FPR3|EDR1_ARATH	410	1e-116	Serine/threonine-protein kinase EDR1 OS=Arabidopsis thaliana GN=EDR1 PE=1 SV=1	YAR019c	121	4e-27	COG0515	Serine/threonine protein kinase	K04424	7e-120	429	aly:ARALYDRAFT_909157	sterile alpha motif and leucine zipper containing kinase AZK [EC:2.7.11.25]	GO:0006468//protein phosphorylation;GO:0009651//response to salt stress;GO:0048573//photoperiodism, flowering	GO:0004712//protein serine/threonine/tyrosine kinase activity;GO:0005524//ATP binding;GO:0004709//MAP kinase kinase kinase activity	GO:0005634//nucleus;GO:0005886//plasma membrane	--
Unigene28988_All	387	3	26	0.3537	3.2761	3.21138	Up	3.71344e-06	3.44811e-05	gi|449475484|ref|XP_004154468.1|	136	1e-31	PREDICTED: uncharacterized LOC101211699 [Cucumis sativus]	gi|449475483|ref|XM_004154420.1|	61.9	4e-07	PREDICTED: Cucumis sativus uncharacterized LOC101211699 (LOC101211699), mRNA	--	--	--	--	--	--	--	--	--	--	--	--	--	--	-	-	-	--
CL6097.Contig1_All	256	5	43	0.8913	8.1908	3.20002	Up	2.01222e-09	2.98713e-08	gi|449441284|ref|XP_004138412.1|	94.4	5e-19	PREDICTED: laccase-12-like [Cucumis sativus] >gi|449531607|ref|XP_004172777.1| PREDICTED: laccase-12-like [Cucumis sativus]	gi|449531606|ref|XM_004172729.1|	119	1e-24	PREDICTED: Cucumis sativus laccase-12-like (LOC101228974), mRNA	sp|Q2QYS3|LAC23_ORYSJ	88.2	1e-18	Laccase-23 OS=Oryza sativa subsp. japonica GN=LAC23 PE=2 SV=1	--	--	--	--	--	--	--	--	--	--	GO:0046688//response to copper ion;GO:0046274//lignin catabolic process;GO:0055114//oxidation-reduction process	GO:0005507//copper ion binding;GO:0052716//hydroquinone:oxygen oxidoreductase activity;GO:0008447//L-ascorbate oxidase activity	GO:0016023//cytoplasmic membrane-bounded vesicle;GO:0048046//apoplast	--
Unigene15627_All	223	4	34	0.8185	7.4349	3.18326	Up	1.16463e-07	1.39074e-06	--	--	--	--	--	--	--	--	--	--	--	--	--	--	--	--	--	--	--	--	--	--	-	-	-	--
Unigene8557_All	694	7	59	0.4603	4.1456	3.17093	Up	2.18792e-12	4.24453e-11	gi|449458119|ref|XP_004146795.1|	174.5	1e-42	PREDICTED: uncharacterized protein LOC101219104 [Cucumis sativus] >gi|449505707|ref|XP_004162546.1| PREDICTED: uncharacterized protein LOC101228132 [Cucumis sativus]	gi|449505706|ref|XM_004162498.1|	83.8	2e-13	PREDICTED: Cucumis sativus uncharacterized LOC101228132 (LOC101228132), mRNA	--	--	--	--	--	--	--	--	--	--	--	--	--	--	GO:0010363//regulation of plant-type hypersensitive response;GO:0009963//positive regulation of flavonoid biosynthetic process;GO:0006612//protein targeting to membrane	-	GO:0005773//vacuole;GO:0005634//nucleus	--
CL7052.Contig4_All	1611	84	707	2.3794	21.4004	3.16897	Up	5.5626e-133	1.00796e-130	gi|449439769|ref|XP_004137658.1|	506.9	4e-142	PREDICTED: probable WRKY transcription factor 40-like [Cucumis sativus] >gi|449497187|ref|XP_004160337.1| PREDICTED: probable WRKY transcription factor 40-like [Cucumis sativus]	gi|449497186|ref|XM_004160289.1|	605	1e-170	PREDICTED: Cucumis sativus probable WRKY transcription factor 40-like (LOC101218366), mRNA	sp|Q9SAH7|WRK40_ARATH	296	3e-80	Probable WRKY transcription factor 40 OS=Arabidopsis thaliana GN=WRKY40 PE=1 SV=1	--	--	--	--	--	K13424	8e-19	93.6	vvi:100243352	WRKY transcription factor 33	GO:0051707//response to other organism;GO:1901700;GO:0031347//regulation of defense response;GO:0010033//response to organic substance	-	-	--
Unigene18694_All	754	12	101	0.7263	6.532	3.16889	Up	2.82632e-20	8.77081e-19	gi|359473751|ref|XP_003631355.1|	167.2	2e-40	PREDICTED: uncharacterized protein LOC100852520 [Vitis vinifera]	gi|359473750|ref|XM_003631307.1|	107	2e-20	PREDICTED: Vitis vinifera uncharacterized LOC100852520 (LOC100852520), mRNA	--	--	--	--	--	--	--	--	--	--	--	--	--	--	-	GO:0051082//unfolded protein binding;GO:0031072//heat shock protein binding	GO:0009507//chloroplast	--
Unigene10070_All	1230	5	42	0.1855	1.6651	3.16612	Up	3.7471e-09	5.40121e-08	gi|449477674|ref|XP_004155089.1|	527.3	2e-148	PREDICTED: transcription factor MYB32-like [Cucumis sativus]	gi|449477673|ref|XM_004155041.1|	440	1e-120	PREDICTED: Cucumis sativus transcription factor MYB32-like (LOC101205420), mRNA	sp|Q8LPH6|MYB86_ARATH	238	5e-63	Transcription factor MYB86 OS=Arabidopsis thaliana GN=MYB86 PE=2 SV=1	ECU11g1690	110	7e-24	COG5147	Myb superfamily proteins, including transcription factors and mRNA splicing factors	K09422	6e-114	409	vvi:100241618	myb proto-oncogene protein, plant	-	GO:0005488//binding	-	--
Unigene22535_All	281	5	42	0.812	7.2886	3.16609	Up	3.7471e-09	5.40006e-08	gi|449451213|ref|XP_004143356.1|	73.6	1e-12	PREDICTED: phenylalanine ammonia-lyase-like [Cucumis sativus] >gi|449482592|ref|XP_004156338.1| PREDICTED: phenylalanine ammonia-lyase-like [Cucumis sativus]	gi|449482469|ref|XM_004156244.1|	87.7	6e-15	PREDICTED: Cucumis sativus phenylalanine ammonia-lyase-like (LOC101218382), mRNA	sp|P45730|PALY_POPTR	63.9	2e-11	Phenylalanine ammonia-lyase OS=Populus trichocarpa GN=PAL PE=2 SV=1	--	--	--	--	--	K10775	2e-12	68.9	vvi:100241377	phenylalanine ammonia-lyase [EC:4.3.1.24]	-	-	-	--
Unigene26001_All	1250	66	554	2.4094	21.6122	3.1651	Up	1.86214e-104	2.74205e-102	gi|449517806|ref|XP_004165935.1|	224.6	2e-57	PREDICTED: SPX domain-containing protein 2-like [Cucumis sativus]	gi|449517805|ref|XM_004165887.1|	295	6e-77	PREDICTED: Cucumis sativus SPX domain-containing protein 2-like (LOC101218983), mRNA	sp|O48781|SPX2_ARATH	157	1e-38	SPX domain-containing protein 2 OS=Arabidopsis thaliana GN=SPX2 PE=2 SV=1	--	--	--	--	--	--	--	--	--	--	GO:0016036//cellular response to phosphate starvation	-	-	--
Unigene29532_All	1956	110	917	2.5663	22.8612	3.15514	Up	3.13014e-171	7.07569e-169	gi|449436465|ref|XP_004136013.1|	946.8	0	PREDICTED: probable pectinesterase/pectinesterase inhibitor 7-like [Cucumis sativus]	gi|449436464|ref|XM_004135965.1|	866	0	PREDICTED: Cucumis sativus probable pectinesterase/pectinesterase inhibitor 7-like (LOC101205321), mRNA	sp|Q9SRX4|PME7_ARATH	719	0	Probable pectinesterase/pectinesterase inhibitor 7 OS=Arabidopsis thaliana GN=PME7 PE=2 SV=1	CAC3373	161	3e-39	COG4677	Pectin methylesterase	K01051	0	772	gmx:100800971	pectinesterase [EC:3.1.1.11]	GO:0009409//response to cold;GO:0009741//response to brassinosteroid stimulus;GO:0042545//cell wall modification;GO:0043086//negative regulation of catalytic activity;GO:0015824//proline transport;GO:0045490//pectin catabolic process	GO:0045330;GO:0030599//pectinesterase activity;GO:0004857//enzyme inhibitor activity	GO:0009505//plant-type cell wall;GO:0005576//extracellular region	--
CL2606.Contig1_All	1835	3	25	0.0746	0.6644	3.1548	Up	6.9398e-06	6.12422e-05	gi|449433495|ref|XP_004134533.1|	862.1	0	PREDICTED: probable UDP-N-acetylglucosamine pyrophosphorylase-like [Cucumis sativus] >gi|449490659|ref|XP_004158669.1| PREDICTED: probable UDP-N-acetylglucosamine pyrophosphorylase-like [Cucumis sativus]	gi|449433494|ref|XM_004134485.1|	2032	0	PREDICTED: Cucumis sativus probable UDP-N-acetylglucosamine pyrophosphorylase-like (LOC101204428), mRNA >gi|449490658|ref|XM_004158621.1| PREDICTED: Cucumis sativus probable UDP-N-acetylglucosamine pyrophosphorylase-like (LOC101228113), mRNA	sp|O64765|UAP1_ARATH	750	0	Probable UDP-N-acetylglucosamine pyrophosphorylase OS=Arabidopsis thaliana GN=At2g35020 PE=2 SV=1	YDL103c	292	2e-78	COG4284	UDP-glucose pyrophosphorylase	K00972	0	809	gmx:100798881	UDP-N-acetylglucosamine pyrophosphorylase [EC:2.7.7.23]	GO:0006047//UDP-N-acetylglucosamine metabolic process;GO:0019276//UDP-N-acetylgalactosamine metabolic process;GO:0006011//UDP-glucose metabolic process	GO:0003983//UTP:glucose-1-phosphate uridylyltransferase activity;GO:0003977//UDP-N-acetylglucosamine diphosphorylase activity	GO:0005886//plasma membrane	--
Unigene39904_All	296	3	25	0.4625	4.1186	3.15463	Up	6.9398e-06	6.12502e-05	gi|460378451|ref|XP_004234985.1|	119.4	1e-26	PREDICTED: luminal-binding protein 5-like [Solanum lycopersicum]	gi|32992547|dbj|AK107338.1|	412	1e-113	Oryza sativa Japonica Group cDNA clone:002-126-F12, full insert sequence	sp|Q39043|MD37F_ARATH	115	6e-27	Mediator of RNA polymerase II transcription subunit 37f OS=Arabidopsis thaliana GN=MED37F PE=1 SV=2	SPBC1709.05	138	2e-33	COG0443	Molecular chaperone	K03283	1e-27	119	sbi:SORBI_01g039390	heat shock 70kDa protein 1/8	-	GO:0000166//nucleotide binding	-	--
Unigene18584_All	319	3	25	0.4292	3.8216	3.15445	Up	6.9398e-06	6.12342e-05	--	--	--	--	--	--	--	--	--	--	--	--	--	--	--	--	--	--	--	--	--	--	-	-	-	--
Unigene23497_All	1655	113	941	3.1157	27.7262	3.15362	Up	1.39424e-175	3.21622e-173	gi|357455511|ref|XP_003598036.1|	591.3	1e-167	Cellulose synthase [Medicago truncatula] >gi|355487084|gb|AES68287.1| Cellulose synthase [Medicago truncatula]	--	--	--	--	sp|Q570S7|CSLG1_ARATH	348	7e-96	Cellulose synthase-like protein G1 OS=Arabidopsis thaliana GN=CSLG1 PE=2 SV=1	alr3757	80.9	6e-15	COG1215	Glycosyltransferases, probably involved in cell wall biogenesis	K10999	4e-77	287	aly:ARALYDRAFT_909737	cellulose synthase A [EC:2.4.1.12]	-	GO:0016757//transferase activity, transferring glycosyl groups	GO:0016020//membrane	--
Unigene9064_All	735	4	33	0.2483	2.1894	3.14038	Up	2.16878e-07	2.50018e-06	gi|449521042|ref|XP_004167540.1|	144.8	1e-33	PREDICTED: protein farnesyltransferase/geranylgeranyltransferase type-1 subunit alpha-like [Cucumis sativus]	gi|449521041|ref|XM_004167492.1|	238	7e-60	PREDICTED: Cucumis sativus protein farnesyltransferase/geranylgeranyltransferase type-1 subunit alpha-like (LOC101212104), mRNA	sp|O24304|FNTA_PEA	113	1e-25	Protein farnesyltransferase/geranylgeranyltransferase type-1 subunit alpha OS=Pisum sativum GN=FTA PE=2 SV=1	SPAPB1A10.04c	61.2	2e-09	COG5536	Protein prenyltransferase, alpha subunit	K05955	7e-28	122	vvi:100247502	protein farnesyltransferase/geranylgeranyltransferase type-1 subunit alpha [EC:2.5.1.58 2.5.1.59]	GO:0009788//negative regulation of abscisic acid mediated signaling pathway;GO:0008360//regulation of cell shape;GO:0009414//response to water deprivation;GO:0048509//regulation of meristem development;GO:0018344//protein geranylgeranylation;GO:0018343//protein farnesylation	GO:0004311//farnesyltranstransferase activity;GO:0046982//protein heterodimerization activity;GO:0008318//protein prenyltransferase activity	GO:0005965//protein farnesyltransferase complex;GO:0005953//CAAX-protein geranylgeranyltransferase complex;GO:0005634//nucleus	--
CL7577.Contig1_All	1450	4	33	0.1259	1.1098	3.13995	Up	2.16878e-07	2.50061e-06	gi|449458628|ref|XP_004147049.1|	489.2	7e-137	PREDICTED: uncharacterized protein LOC101220927 [Cucumis sativus] >gi|449489625|ref|XP_004158368.1| PREDICTED: uncharacterized LOC101220927 [Cucumis sativus]	gi|449458627|ref|XM_004147001.1|	509	1e-141	PREDICTED: Cucumis sativus uncharacterized LOC101220927 (LOC101220927), mRNA >gi|449489624|ref|XM_004158320.1| PREDICTED: Cucumis sativus uncharacterized LOC101220927 (LOC101220927), mRNA	--	--	--	--	--	--	--	--	--	--	--	--	--	--	GO:0044763;GO:0044710;GO:0071702;GO:0045087//innate immune response;GO:0044765;GO:0033036;GO:0050794//regulation of cellular process;GO:0031347//regulation of defense response	-	-	--
CL6207.Contig2_All	1711	22	181	0.5867	5.1585	3.13626	Up	6.90488e-35	3.61778e-33	gi|449454119|ref|XP_004144803.1|	729.9	0	PREDICTED: probable receptor-like protein kinase At2g42960-like [Cucumis sativus]	gi|449454118|ref|XM_004144755.1|	850	0	PREDICTED: Cucumis sativus probable receptor-like protein kinase At2g42960-like (LOC101217212), mRNA	sp|Q9SJG2|Y2296_ARATH	563	1e-160	Probable receptor-like protein kinase At2g42960 OS=Arabidopsis thaliana GN=At2g42960 PE=3 SV=1	BS_yloP_1	101	5e-21	COG0515	Serine/threonine protein kinase	K04733	7e-80	296	smo:SELMODRAFT_159261	interleukin-1 receptor-associated kinase 4 [EC:2.7.11.1]	GO:0006468//protein phosphorylation;GO:0000165//MAPK cascade	GO:0004674//protein serine/threonine kinase activity;GO:0005524//ATP binding	GO:0005886//plasma membrane	--
Unigene10256_All	1804	176	1446	4.452	39.0868	3.13416	Up	3.31676e-267	1.14962e-264	gi|449434290|ref|XP_004134929.1|	673.7	0	PREDICTED: phospholipase A1-IIgamma-like [Cucumis sativus] >gi|449479539|ref|XP_004155629.1| PREDICTED: phospholipase A1-IIgamma-like [Cucumis sativus]	gi|449434289|ref|XM_004134881.1|	646	0	PREDICTED: Cucumis sativus phospholipase A1-IIgamma-like (LOC101219059), mRNA >gi|449479538|ref|XM_004155581.1| PREDICTED: Cucumis sativus phospholipase A1-IIgamma-like (LOC101228676), mRNA	sp|O49523|DSEL_ARATH	520	1e-147	Phospholipase A1-IIgamma OS=Arabidopsis thaliana GN=DSEL PE=1 SV=1	sll0482	57.8	6e-08	COG3675	Predicted lipase	K01058	1e-47	189	gmx:100800549	phospholipase A1 [EC:3.1.1.32]	GO:0052651//monoacylglycerol catabolic process;GO:0010187//negative regulation of seed germination;GO:0019915//lipid storage;GO:0046340//diacylglycerol catabolic process	GO:0008970//phosphatidylcholine 1-acylhydrolase activity;GO:0047372//acylglycerol lipase activity;GO:0004806//triglyceride lipase activity	GO:0005737//cytoplasm	--
Unigene3395_All	2116	138	1125	2.9761	25.926	3.1229	Up	1.38539e-207	3.77568e-205	gi|449445834|ref|XP_004140677.1|	683.7	0	PREDICTED: protein IQ-DOMAIN 14-like [Cucumis sativus]	gi|449487408|ref|XM_004157564.1|	527	1e-146	PREDICTED: Cucumis sativus protein IQ-DOMAIN 14-like (LOC101228689), mRNA	sp|Q8LPG9|IQD14_ARATH	369	4e-102	Protein IQ-DOMAIN 14 OS=Arabidopsis thaliana GN=IQD14 PE=1 SV=1	--	--	--	--	--	--	--	--	--	--	GO:0045492//xylan biosynthetic process;GO:0010413//glucuronoxylan metabolic process	-	GO:0005886//plasma membrane	--
Unigene10302_All	1423	53	432	1.6996	14.8039	3.12271	Up	8.78322e-81	1.00109e-78	gi|449450324|ref|XP_004142913.1|	301.6	2e-80	PREDICTED: transcription factor RAX2-like [Cucumis sativus] >gi|449527545|ref|XP_004170771.1| PREDICTED: transcription factor RAX2-like [Cucumis sativus]	gi|449527544|ref|XM_004170723.1|	349	5e-93	PREDICTED: Cucumis sativus transcription factor RAX2-like (LOC101214485), mRNA	sp|Q9M2Y9|RAX3_ARATH	209	3e-54	Transcription factor RAX3 OS=Arabidopsis thaliana GN=RAX3 PE=2 SV=1	ECU11g1690	108	2e-23	COG5147	Myb superfamily proteins, including transcription factors and mRNA splicing factors	K09422	1e-59	228	pop:POPTR_561710	myb proto-oncogene protein, plant	-	GO:0003677//DNA binding;GO:0003682//chromatin binding	-	--
CL8213.Contig2_All	1110	8	65	0.3289	2.8555	3.11802	Up	2.51226e-13	5.21662e-12	gi|449451970|ref|XP_004143733.1|	502.3	6e-141	PREDICTED: lignin-forming anionic peroxidase-like [Cucumis sativus] >gi|449521798|ref|XP_004167916.1| PREDICTED: lignin-forming anionic peroxidase-like [Cucumis sativus]	gi|449521797|ref|XM_004167868.1|	174	1e-40	PREDICTED: Cucumis sativus lignin-forming anionic peroxidase-like (LOC101215530), mRNA	sp|Q9LEH3|PER15_IPOBA	367	5e-102	Peroxidase 15 OS=Ipomoea batatas GN=pod PE=1 SV=1	--	--	--	--	--	K00430	1e-104	377	vvi:100265513	peroxidase [EC:1.11.1.7]	-	GO:0016491//oxidoreductase activity;GO:0005488//binding	-	--
CL7047.Contig4_All	1727	11	89	0.2907	2.513	3.11181	Up	9.7089e-18	2.6503e-16	gi|307136409|gb|ADN34218.1|	697.6	0	polygalacturonase [Cucumis melo subsp. melo]	gi|449490641|ref|XM_004158616.1|	587	1e-164	PREDICTED: Cucumis sativus polygalacturonase QRT3-like (LOC101227040), mRNA	sp|O49432|QRT3_ARATH	540	8e-154	Polygalacturonase QRT3 OS=Arabidopsis thaliana GN=QRT3 PE=2 SV=1	--	--	--	--	--	--	--	--	--	--	GO:0009827//plant-type cell wall modification;GO:0009556//microsporogenesis;GO:0010584//pollen exine formation;GO:0009860//pollen tube growth	GO:0004650//polygalacturonase activity	GO:0005576//extracellular region	--
Unigene484_All	1645	92	744	2.5521	22.0549	3.11134	Up	2.10232e-137	3.92524e-135	gi|356556726|ref|XP_003546674.1|	513.5	4e-144	PREDICTED: UDP-glycosyltransferase 73B3-like [Glycine max]	--	--	--	--	sp|D4Q9Z4|SGT2_SOYBN	487	9e-138	Soyasapogenol B glucuronide galactosyltransferase OS=Glycine max GN=GmSGT2 PE=1 SV=1	SPBC28F2.12	63.2	1e-09	COG0086	DNA-directed RNA polymerase, beta' subunit/160 kD subunit	K13496	2e-99	361	ath:AT2G36780	UDP-glucosyl transferase 73C [EC:2.4.1.-]	-	GO:0016740//transferase activity	-	--
Unigene13191_All	2260	85	687	1.7163	14.8234	3.1105	Up	5.57914e-127	9.87143e-125	gi|449507512|ref|XP_004163053.1|	1233.8	0	PREDICTED: LOW QUALITY PROTEIN: UDP-glucuronate:xylan alpha-glucuronosyltransferase 1-like [Cucumis sativus]	gi|449507511|ref|XM_004163005.1|	2101	0	PREDICTED: Cucumis sativus UDP-glucuronate:xylan alpha-glucuronosyltransferase 1-like (LOC101222026), mRNA	sp|Q9LSB1|GUX1_ARATH	897	0	UDP-glucuronate:xylan alpha-glucuronosyltransferase 1 OS=Arabidopsis thaliana GN=GUX1 PE=2 SV=1	SMc04081	90.9	9e-18	COG5597	Alpha-N-acetylglucosamine transferase	K00750	0	924	rcu:RCOM_0138290	glycogenin glucosyltransferase [EC:2.4.1.186]	GO:0005982//starch metabolic process;GO:0010417//glucuronoxylan biosynthetic process	GO:0080116//glucuronoxylan glucuronosyltransferase activity;GO:0008466//glycogenin glucosyltransferase activity	GO:0005794//Golgi apparatus	--
Unigene31372_All	738	20	161	1.2367	10.6382	3.10469	Up	6.62612e-31	3.09933e-29	gi|449515985|ref|XP_004165028.1|	23.9	8e-18	PREDICTED: alcohol dehydrogenase-like 6-like [Cucumis sativus]	gi|449515984|ref|XM_004164980.1|	133	3e-28	PREDICTED: Cucumis sativus alcohol dehydrogenase-like 6-like (LOC101231544), mRNA	sp|Q8LEB2|ADHL6_ARATH	87.4	7e-18	Alcohol dehydrogenase-like 6 OS=Arabidopsis thaliana GN=At5g24760 PE=2 SV=2	SPBC1539.07c	54.3	2e-07	COG1062	Zn-dependent alcohol dehydrogenases, class III	K00001	7e-18	89	aly:ARALYDRAFT_489336	alcohol dehydrogenase [EC:1.1.1.1]	GO:0009611//response to wounding;GO:0009805//coumarin biosynthetic process;GO:0055114//oxidation-reduction process	GO:0016747//transferase activity, transferring acyl groups other than amino-acyl groups;GO:0016491//oxidoreductase activity;GO:0008270//zinc ion binding;GO:0000166//nucleotide binding	GO:0005737//cytoplasm	--
Unigene37961_All	1224	4	32	0.1491	1.2749	3.09603	Up	4.02734e-07	4.43257e-06	gi|190613766|gb|ACE80931.1|	441.4	1e-122	omega-3 fatty acid desaturase [Cucumis sativus]	gi|449507794|ref|XM_004163083.1|	644	0	PREDICTED: Cucumis sativus omega-3 fatty acid desaturase, chloroplastic-like (LOC101223135), mRNA	sp|P48620|FAD3C_SESIN	397	5e-111	Omega-3 fatty acid desaturase, chloroplastic OS=Sesamum indicum GN=FAD7 PE=2 SV=1	all1597	222	9e-58	COG3239	Fatty acid desaturase	K10257	4e-116	416	pop:POPTR_724446	omega-3 fatty acid desaturase (delta-15 desaturase) [EC:1.14.19.-]	GO:0006633//fatty acid biosynthetic process;GO:0009409//response to cold;GO:0055114//oxidation-reduction process	GO:0042389//omega-3 fatty acid desaturase activity;GO:0016717//oxidoreductase activity, acting on paired donors, with oxidation of a pair of donors resulting in the reduction of molecular oxygen to two molecules of water	GO:0009941//chloroplast envelope	--
Unigene8467_All	556	6	48	0.4924	4.2098	3.09585	Up	4.21102e-10	6.73654e-09	gi|449523750|ref|XP_004168886.1|	366.3	1e-100	PREDICTED: LOW QUALITY PROTEIN: beta-fructofuranosidase, insoluble isoenzyme CWINV1-like, partial [Cucumis sativus]	gi|449523747|ref|XM_004168837.1|	480	1e-133	PREDICTED: Cucumis sativus beta-fructofuranosidase, insoluble isoenzyme CWINV1-like (LOC101209367), mRNA	sp|Q43866|INV1_ARATH	323	4e-89	Beta-fructofuranosidase, insoluble isoenzyme CWINV1 OS=Arabidopsis thaliana GN=CWINV1 PE=1 SV=1	TM1414	108	7e-24	COG1621	Beta-fructosidases (levanase/invertase)	K01193	1e-89	326	gmx:100776791	beta-fructofuranosidase [EC:3.2.1.26]	GO:0005975//carbohydrate metabolic process;GO:0009611//response to wounding;GO:0010200//response to chitin;GO:0002679//respiratory burst involved in defense response;GO:0015706//nitrate transport;GO:0006865//amino acid transport;GO:0010167//response to nitrate;GO:0080167//response to karrikin	GO:0004564//beta-fructofuranosidase activity	GO:0005886//plasma membrane;GO:0005618//cell wall;GO:0005576//extracellular region	--
Unigene39538_All	339	3	24	0.4038	3.4523	3.09585	Up	1.29235e-05	0.000107838	gi|147817638|emb|CAN64497.1|	53.5	1e-06	hypothetical protein VITISV_004037 [Vitis vinifera]	gi|332640072|gb|CP002686.1|	127	8e-27	Arabidopsis thaliana chromosome 3, complete sequence	--	--	--	--	--	--	--	--	--	--	--	--	--	--	-	-	-	--
Unigene39500_All	225	3	24	0.6084	5.2015	3.09584	Up	1.29235e-05	0.000107864	--	--	--	--	--	--	--	--	--	--	--	--	--	--	--	--	--	--	--	--	--	--	-	-	-	--
Unigene18635_All	389	4	32	0.4692	4.0114	3.09583	Up	4.02734e-07	4.43329e-06	--	--	--	--	--	--	--	--	--	--	--	--	--	--	--	--	--	--	--	--	--	--	-	-	-	--
Unigene25311_All	373	3	24	0.367	3.1376	3.09581	Up	1.29235e-05	0.000107824	--	--	--	--	--	--	--	--	--	--	--	--	--	--	--	--	--	--	--	--	--	--	-	-	-	--
Unigene5606_All	731	13	104	0.8115	6.9377	3.09579	Up	2.09088e-20	6.53052e-19	gi|359493145|ref|XP_002264797.2|	220.3	2e-56	PREDICTED: uncharacterized protein LOC100262406 [Vitis vinifera] >gi|147834261|emb|CAN66025.1| hypothetical protein VITISV_028773 [Vitis vinifera]	gi|356574550|ref|XM_003555361.1|	165	8e-38	PREDICTED: Glycine max ethylene-responsive transcription factor RAP2-6-like (LOC100802242), mRNA	sp|Q70II3|EF110_ARATH	148	3e-36	Ethylene-responsive transcription factor ERF110 OS=Arabidopsis thaliana GN=ERF110 PE=2 SV=2	--	--	--	--	--	K09286	2e-29	127	ath:AT1G43160	EREBP-like factor	-	-	-	--
Unigene15188_All	399	12	96	1.3724	11.7327	3.09576	Up	6.11122e-19	1.77886e-17	--	--	--	--	--	--	--	--	--	--	--	--	--	--	--	--	--	--	--	--	--	--	-	-	-	--
Unigene6356_All	265	3	24	0.5166	4.4164	3.09575	Up	1.29235e-05	0.000107784	gi|449434364|ref|XP_004134966.1|	102.4	2e-21	PREDICTED: cysteine-rich receptor-like protein kinase 29-like [Cucumis sativus]	gi|449479656|ref|XM_004155618.1|	71.9	3e-10	PREDICTED: Cucumis sativus cysteine-rich receptor-like protein kinase 29-like (LOC101207636), mRNA	sp|Q8GYA4|CRK10_ARATH	48.9	7e-07	Cysteine-rich receptor-like protein kinase 10 OS=Arabidopsis thaliana GN=CRK10 PE=1 SV=3	--	--	--	--	--	--	--	--	--	--	-	GO:0004672//protein kinase activity	-	--
Unigene10413_All	1481	50	400	1.5406	13.1705	3.09575	Up	2.66014e-74	2.84038e-72	gi|449432773|ref|XP_004134173.1|	858.6	0	PREDICTED: uncharacterized protein LOC101215085 [Cucumis sativus]	gi|449432772|ref|XM_004134125.1|	1624	0	PREDICTED: Cucumis sativus uncharacterized LOC101215085 (LOC101215085), mRNA	--	--	--	--	--	--	--	--	--	--	--	--	--	--	-	GO:0016787//hydrolase activity	-	--
Unigene19475_All	215	12	96	2.547	21.7737	3.09572	Up	6.11122e-19	1.77809e-17	--	--	--	--	--	--	--	--	--	--	--	--	--	--	--	--	--	--	--	--	--	--	-	-	-	--
Unigene9519_All	227	3	24	0.6031	5.1557	3.0957	Up	1.29235e-05	0.000107811	--	--	--	--	--	--	--	--	--	--	--	--	--	--	--	--	--	--	--	--	--	--	-	-	-	--
Unigene12572_All	232	3	24	0.5901	5.0445	3.09568	Up	1.29235e-05	0.000107798	--	--	--	--	--	--	--	--	--	--	--	--	--	--	--	--	--	--	--	--	--	--	-	-	-	--
Unigene2435_All	765	9	72	0.5369	4.5895	3.09561	Up	1.56071e-14	3.53152e-13	gi|449442060|ref|XP_004138800.1|	284.6	1e-75	PREDICTED: zinc finger CCCH domain-containing protein 14-like [Cucumis sativus]	gi|449442059|ref|XM_004138752.1|	172	3e-40	PREDICTED: Cucumis sativus zinc finger CCCH domain-containing protein 14-like (LOC101214547), mRNA	sp|Q9C9F5|C3H15_ARATH	207	4e-54	Zinc finger CCCH domain-containing protein 15 OS=Arabidopsis thaliana GN=At1g68200 PE=2 SV=1	SPBC1718.07c	80.1	4e-15	COG5063	CCCH-type Zn-finger protein	--	--	--	--	--	GO:0006355//regulation of transcription, DNA-dependent	GO:0005488//binding	-	--
CL2656.Contig1_All	818	3	24	0.1674	1.4307	3.09535	Up	1.29235e-05	0.000107851	gi|359475964|ref|XP_002279612.2|	34.3	1e-34	PREDICTED: ankyrin repeat-containing protein At2g01680-like [Vitis vinifera]	--	--	--	--	sp|Q9ZU96|Y2168_ARATH	73.2	2e-13	Ankyrin repeat-containing protein At2g01680 OS=Arabidopsis thaliana GN=At2g01680 PE=1 SV=1	RSc0257	63.5	4e-10	COG0666	FOG: Ankyrin repeat	K06694	4e-09	60.1	rcu:RCOM_1621740	26S proteasome non-ATPase regulatory subunit 10	-	-	-	--
Unigene27799_All	1369	513	4068	17.0999	144.903	3.08302	Up	0	0	gi|449445987|ref|XP_004140753.1|	693	0	PREDICTED: heat shock protein 83-like [Cucumis sativus] >gi|449485495|ref|XP_004157188.1| PREDICTED: heat shock protein 83-like [Cucumis sativus]	gi|449445986|ref|XM_004140705.1|	1251	0	PREDICTED: Cucumis sativus heat shock protein 83-like (LOC101210914), mRNA	sp|P51819|HSP83_IPONI	672	0	Heat shock protein 83 OS=Ipomoea nil GN=HSP83A PE=2 SV=1	SPAC926.04c	468	1e-131	COG0326	Molecular chaperone, HSP90 family	K04079	0	687	rcu:RCOM_1582180	molecular chaperone HtpG	GO:0042742//defense response to bacterium;GO:0006457//protein folding;GO:0046685//response to arsenic-containing substance;GO:0009408//response to heat	GO:0005524//ATP binding;GO:0051082//unfolded protein binding	GO:0005886//plasma membrane;GO:0005618//cell wall;GO:0005829//cytosol	--
Unigene19470_All	485	13	103	1.2232	10.356	3.08173	Up	3.85334e-20	1.19142e-18	gi|449466266|ref|XP_004150847.1|	232.3	2e-60	PREDICTED: uncharacterized protein LOC101210555 [Cucumis sativus] >gi|449488123|ref|XP_004157945.1| PREDICTED: uncharacterized protein LOC101229363 [Cucumis sativus]	gi|449488122|ref|XM_004157897.1|	182	2e-43	PREDICTED: Cucumis sativus uncharacterized LOC101229363 (LOC101229363), mRNA	--	--	--	--	--	--	--	--	--	--	--	--	--	--	-	-	-	--
Unigene10567_All	1066	63	499	2.6969	22.8266	3.08134	Up	7.29398e-92	9.4989e-90	gi|449433297|ref|XP_004134434.1|	56.6	8e-07	PREDICTED: leucine-rich repeat extensin-like protein 6-like [Cucumis sativus] >gi|449518721|ref|XP_004166385.1| PREDICTED: leucine-rich repeat extensin-like protein 6-like [Cucumis sativus]	gi|449433296|ref|XM_004134386.1|	466	1e-128	PREDICTED: Cucumis sativus leucine-rich repeat extensin-like protein 6-like (LOC101218509), mRNA >gi|449518720|ref|XM_004166337.1| PREDICTED: Cucumis sativus leucine-rich repeat extensin-like protein 6-like (LOC101230602), mRNA	sp|Q9LUI1|LRX6_ARATH	390	9e-109	Leucine-rich repeat extensin-like protein 6 OS=Arabidopsis thaliana GN=LRX6 PE=2 SV=1	alr0124_1	58.2	2e-08	COG4886	Leucine-rich repeat (LRR) protein	K00924	2e-22	105	ath:AT1G28440	[EC:2.7.1.-]	GO:0016310//phosphorylation	GO:0016301//kinase activity;GO:0005199//structural constituent of cell wall	GO:0005576//extracellular region;GO:0009506//plasmodesma;GO:0009505//plant-type cell wall	--
Unigene11028_All	423	10	79	1.0788	9.1072	3.07758	Up	9.72988e-16	2.36985e-14	--	--	--	--	--	--	--	--	--	--	--	--	--	--	--	--	--	--	--	--	--	--	-	-	-	--
Unigene1961_All	298	45	354	6.8909	57.9276	3.07149	Up	1.89962e-65	1.79823e-63	--	--	--	--	--	--	--	--	--	--	--	--	--	--	--	--	--	--	--	--	--	--	-	-	-	--
Unigene32365_All	211	14	110	3.0278	25.4219	3.06973	Up	2.43346e-21	7.96104e-20	--	--	--	--	--	--	--	--	--	--	--	--	--	--	--	--	--	--	--	--	--	--	-	-	-	--
Unigene20797_All	1037	25	196	1.1001	9.2167	3.06662	Up	7.13728e-37	3.95736e-35	gi|224136932|ref|XP_002322452.1|	369.8	4e-101	cytochrome P450 [Populus trichocarpa] >gi|222869448|gb|EEF06579.1| cytochrome P450 [Populus trichocarpa]	gi|449531558|ref|XM_004172705.1|	65.9	8e-08	PREDICTED: Cucumis sativus probable (S)-N-methylcoclaurine 3'-hydroxylase isozyme 2-like (LOC101232771), mRNA	sp|Q9FXW4|C80B2_COPJA	281	4e-76	Probable (S)-N-methylcoclaurine 3'-hydroxylase isozyme 2 OS=Coptis japonica GN=CYP80B2 PE=2 SV=1	alr1450	114	3e-25	COG2124	Cytochrome P450	K00517	3e-68	256	ath:AT3G52970	[EC:1.14.-.-]	-	GO:0046872//metal ion binding;GO:0016705//oxidoreductase activity, acting on paired donors, with incorporation or reduction of molecular oxygen;GO:0004497//monooxygenase activity	-	--
Unigene12933_All	426	6	47	0.6427	5.3801	3.06542	Up	7.77974e-10	1.21214e-08	gi|449460939|ref|XP_004148201.1|	147.5	6e-35	PREDICTED: uncharacterized protein LOC101207929 [Cucumis sativus] >gi|449507813|ref|XP_004163135.1| PREDICTED: uncharacterized LOC101207929 [Cucumis sativus]	gi|449460938|ref|XM_004148153.1|	161	7e-37	PREDICTED: Cucumis sativus uncharacterized LOC101207929 (LOC101207929), mRNA >gi|449507812|ref|XM_004163087.1| PREDICTED: Cucumis sativus uncharacterized LOC101207929 (LOC101207929), mRNA	sp|Q84ZL0|FH5_ORYSJ	65.5	3e-13	Formin-like protein 5 OS=Oryza sativa subsp. japonica GN=FH5 PE=2 SV=2	Rv3876	56.6	1e-08	COG0455	ATPases involved in chromosome partitioning	K01115	9e-12	60.1	vcn:VOLCADRAFT_99471	phospholipase D [EC:3.1.4.4]	-	-	-	--
CL7297.Contig2_All	1449	90	702	2.8343	23.6248	3.05924	Up	1.25472e-127	2.23171e-125	gi|449433621|ref|XP_004134596.1|	647.1	0	PREDICTED: GDSL esterase/lipase At1g29670-like [Cucumis sativus] >gi|449525043|ref|XP_004169530.1| PREDICTED: GDSL esterase/lipase At1g29670-like [Cucumis sativus]	gi|449433620|ref|XM_004134548.1|	930	0	PREDICTED: Cucumis sativus GDSL esterase/lipase At1g29670-like (LOC101219776), mRNA >gi|449525042|ref|XM_004169482.1| PREDICTED: Cucumis sativus GDSL esterase/lipase At1g29670-like (LOC101219776), mRNA	sp|Q9C7N4|GDL15_ARATH	528	4e-150	GDSL esterase/lipase At1g29670 OS=Arabidopsis thaliana GN=At1g29670 PE=2 SV=1	all3634	83.2	1e-15	COG3240	Phospholipase/lecithinase/hemolysin	K01206	6e-26	117	ath:AT1G67830	alpha-L-fucosidase [EC:3.2.1.51]	GO:0000038//very long-chain fatty acid metabolic process;GO:0042335//cuticle development;GO:0042631//cellular response to water deprivation	GO:0004091//carboxylesterase activity	GO:0005618//cell wall;GO:0009534//chloroplast thylakoid;GO:0005634//nucleus;GO:0048046//apoplast	--
Unigene16366_All	977	21	163	0.9809	8.1356	3.05207	Up	8.91912e-31	4.14319e-29	gi|449462218|ref|XP_004148838.1|	202.6	8e-51	PREDICTED: isoflavone reductase homolog [Cucumis sativus] >gi|449507334|ref|XP_004163002.1| PREDICTED: isoflavone reductase homolog [Cucumis sativus]	gi|449507337|ref|XM_004162955.1|	349	3e-93	PREDICTED: Cucumis sativus isoflavone reductase homolog (LOC101225541), mRNA	sp|E1U332|ALL12_OLEEU	189	2e-48	Isoflavone reductase-like protein OS=Olea europaea PE=1 SV=1	--	--	--	--	--	K00224	1e-44	178	aly:ARALYDRAFT_476671	[EC:1.3.1.-]	GO:0046686//response to cadmium ion	GO:0000166//nucleotide binding	-	--
CL6140.Contig1_All	739	4	31	0.247	2.0456	3.04994	Up	7.45634e-07	7.82192e-06	gi|449465029|ref|XP_004150231.1|	84.3	2e-15	PREDICTED: uncharacterized protein At2g39920-like [Cucumis sativus]	gi|449521678|ref|XM_004167809.1|	141	1e-30	PREDICTED: Cucumis sativus uncharacterized LOC101210469 (LOC101210469), mRNA	--	--	--	--	--	--	--	--	--	--	--	--	--	--	-	-	-	--
Unigene5643_All	268	4	31	0.6811	5.6406	3.04991	Up	7.45634e-07	7.8195e-06	--	--	--	--	gi|297747420|gb|AC241301.1|	58	5e-06	Pinus taeda clone PT_7Ba3000E04, complete sequence	--	--	--	--	--	--	--	--	--	--	--	--	--	--	-	-	-	--
Unigene39563_All	293	4	31	0.623	5.1593	3.04987	Up	7.45634e-07	7.82071e-06	--	--	--	--	--	--	--	--	--	--	--	--	--	--	--	--	--	--	--	--	--	--	-	-	-	--
Unigene2413_All	499	9	69	0.823	6.7429	3.0344	Up	9.7535e-14	2.08815e-12	--	--	--	--	--	--	--	--	--	--	--	--	--	--	--	--	--	--	--	--	--	--	-	-	-	--
Unigene16168_All	211	3	23	0.6488	5.3155	3.03436	Up	2.39752e-05	0.000188909	--	--	--	--	--	--	--	--	--	--	--	--	--	--	--	--	--	--	--	--	--	--	-	-	-	--
Unigene39304_All	239	3	23	0.5728	4.6928	3.03435	Up	2.39752e-05	0.000188953	--	--	--	--	--	--	--	--	--	--	--	--	--	--	--	--	--	--	--	--	--	--	-	-	-	--
Unigene39926_All	232	3	23	0.5901	4.8344	3.03431	Up	2.39752e-05	0.000188843	gi|449482836|ref|XP_004156418.1|	141.4	4e-33	PREDICTED: probable linoleate 9S-lipoxygenase 5-like [Cucumis sativus]	gi|449482835|ref|XM_004156370.1|	155	2e-35	PREDICTED: Cucumis sativus probable linoleate 9S-lipoxygenase 5-like (LOC101227102), mRNA	sp|P38415|LOXA_SOLLC	106	4e-24	Linoleate 9S-lipoxygenase A OS=Solanum lycopersicum GN=LOX1.1 PE=2 SV=1	--	--	--	--	--	K15718	7e-27	116	mtr:MTR_1g083020	linoleate 9S-lipoxygenase [EC:1.13.11.58]	GO:0009753//response to jasmonic acid stimulus;GO:0055114//oxidation-reduction process;GO:0048364//root development;GO:0009611//response to wounding;GO:0009737//response to abscisic acid stimulus;GO:0009816//defense response to bacterium, incompatible interaction;GO:0031408//oxylipin biosynthetic process	GO:0016165//lipoxygenase activity;GO:0005506//iron ion binding	-	--
Unigene39239_All	342	6	46	0.8006	6.5589	3.0343	Up	1.43418e-09	2.17294e-08	gi|449495275|ref|XP_004159785.1|	112.1	2e-24	PREDICTED: LOW QUALITY PROTEIN: COP9 signalosome complex subunit 3-like [Cucumis sativus]	gi|449495274|ref|XM_004159737.1|	230	7e-58	PREDICTED: Cucumis sativus COP9 signalosome complex subunit 3-like (LOC101214949), mRNA	sp|Q8W575|CSN3_ARATH	62.4	6e-11	COP9 signalosome complex subunit 3 OS=Arabidopsis thaliana GN=CSN3 PE=1 SV=2	--	--	--	--	--	K12177	2e-15	79	gmx:100783340	COP9 signalosome complex subunit 3	GO:0009987//cellular process	-	-	--
Unigene19081_All	257	3	23	0.5327	4.3641	3.03429	Up	2.39752e-05	0.000188887	gi|449462142|ref|XP_004148800.1|	171.4	3e-42	PREDICTED: probable ubiquitin-conjugating enzyme E2 25-like [Cucumis sativus] >gi|449523257|ref|XP_004168640.1| PREDICTED: probable ubiquitin-conjugating enzyme E2 25-like [Cucumis sativus]	gi|449523256|ref|XM_004168592.1|	97.6	5e-18	PREDICTED: Cucumis sativus probable ubiquitin-conjugating enzyme E2 25-like (LOC101221014), mRNA	sp|Q9LUQ5|UBC25_ARATH	132	6e-32	Probable ubiquitin-conjugating enzyme E2 25 OS=Arabidopsis thaliana GN=UBC25 PE=2 SV=1	SPAC18B11.07c	57.8	5e-09	COG5078	Ubiquitin-protein ligase	K10581	5e-33	137	gmx:100805463	ubiquitin-conjugating enzyme E2 O [EC:6.3.2.19]	-	GO:0016881//acid-amino acid ligase activity	-	--
Unigene39876_All	311	3	23	0.4402	3.6063	3.03429	Up	2.39752e-05	0.000188865	--	--	--	--	--	--	--	--	--	--	--	--	--	--	--	--	--	--	--	--	--	--	-	-	-	--
Unigene39278_All	385	3	23	0.3556	2.9132	3.03428	Up	2.39752e-05	0.000188931	gi|449453527|ref|XP_004144508.1|	97.1	9e-20	PREDICTED: uncharacterized protein LOC101203820 [Cucumis sativus] >gi|449493152|ref|XP_004159207.1| PREDICTED: uncharacterized LOC101203820 [Cucumis sativus]	gi|449453526|ref|XM_004144460.1|	159	3e-36	PREDICTED: Cucumis sativus uncharacterized LOC101203820 (LOC101203820), mRNA >gi|449493151|ref|XM_004159159.1| PREDICTED: Cucumis sativus uncharacterized LOC101203820 (LOC101203820), mRNA	--	--	--	--	--	--	--	--	--	K14606	3e-13	71.6	aly:ARALYDRAFT_482188	lycopene cyclase CruP	GO:0016117//carotenoid biosynthetic process	GO:0016705//oxidoreductase activity, acting on paired donors, with incorporation or reduction of molecular oxygen	GO:0009507//chloroplast	--
Unigene39754_All	259	3	23	0.5286	4.3304	3.03425	Up	2.39752e-05	0.000188821	gi|449464998|ref|XP_004150216.1|	70.1	1e-11	PREDICTED: nucleobase-ascorbate transporter 2-like [Cucumis sativus] >gi|449500813|ref|XP_004161201.1| PREDICTED: nucleobase-ascorbate transporter 2-like [Cucumis sativus]	gi|449500812|ref|XM_004161153.1|	174	3e-41	PREDICTED: Cucumis sativus nucleobase-ascorbate transporter 2-like (LOC101206560), mRNA	sp|Q94C70|NAT2_ARATH	63.5	3e-11	Nucleobase-ascorbate transporter 2 OS=Arabidopsis thaliana GN=NAT2 PE=2 SV=2	--	--	--	--	--	K14611	8e-12	66.6	gmx:100795365	solute carrier family 23 (nucleobase transporter), member 1/2	GO:0055085//transmembrane transport	GO:0005215//transporter activity	GO:0016020//membrane	--
Unigene27103_All	405	110	842	12.3942	101.381	3.03205	Up	2.19762e-151	4.46051e-149	gi|60266727|gb|AAX15998.1|	190.3	8e-48	S-adenosyl-L-homocysteine hydrolase 1 mutant [Arabidopsis thaliana]	gi|356512438|ref|XM_003524878.1|	327	5e-87	PREDICTED: Glycine max adenosylhomocysteinase-like (LOC100815953), mRNA	sp|O23255|SAHH1_ARATH	190	3e-49	Adenosylhomocysteinase 1 OS=Arabidopsis thaliana GN=SAHH1 PE=1 SV=1	SMc02755	141	4e-34	COG0499	S-adenosylhomocysteine hydrolase	K01251	6e-49	190	aly:ARALYDRAFT_915516	adenosylhomocysteinase [EC:3.3.1.1]	GO:0051788//response to misfolded protein;GO:0009853//photorespiration;GO:0006094//gluconeogenesis;GO:0006346//methylation-dependent chromatin silencing;GO:0006833//water transport;GO:0009793//embryo development ending in seed dormancy;GO:0051049//regulation of transport;GO:0009651//response to salt stress;GO:0080129//proteasome core complex assembly;GO:0048767//root hair elongation;GO:0006972//h…	GO:0000166//nucleotide binding;GO:0004013//adenosylhomocysteinase activity;GO:0005507//copper ion binding	GO:0005774//vacuolar membrane;GO:0048046//apoplast;GO:0005794//Golgi apparatus;GO:0005829//cytosol;GO:0009506//plasmodesma;GO:0005886//plasma membrane	--
Unigene2117_All	535	11	84	0.9382	7.6564	3.0287	Up	2.05532e-16	5.21656e-15	--	--	--	--	--	--	--	--	--	--	--	--	--	--	--	--	--	--	--	--	--	--	-	-	-	--
Unigene4518_All	668	22	168	1.5029	12.264	3.02861	Up	1.91379e-31	9.10281e-30	gi|356573782|ref|XP_003555035.1|	109.4	5e-23	PREDICTED: uncharacterized protein LOC100796379 [Glycine max]	--	--	--	--	--	--	--	--	--	--	--	--	--	K09422	9e-22	101	pop:POPTR_722775	myb proto-oncogene protein, plant	-	-	-	--
CL6268.Contig3_All	2698	19	145	0.3214	2.6207	3.02751	Up	2.4906e-27	1.04428e-25	gi|449469941|ref|XP_004152677.1|	862.8	0	PREDICTED: cytokinin dehydrogenase 5-like [Cucumis sativus]	gi|449469940|ref|XM_004152629.1|	436	1e-119	PREDICTED: Cucumis sativus cytokinin dehydrogenase 5-like (LOC101212272), mRNA	sp|Q67YU0|CKX5_ARATH	745	0	Cytokinin dehydrogenase 5 OS=Arabidopsis thaliana GN=CKX5 PE=2 SV=1	all0324	144	8e-34	COG0277	FAD/FMN-containing dehydrogenases	K00279	0	840	pop:POPTR_754101	cytokinin dehydrogenase [EC:1.5.99.12]	GO:0009823//cytokinin catabolic process;GO:0009753//response to jasmonic acid stimulus;GO:0022900//electron transport chain;GO:0009694//jasmonic acid metabolic process;GO:0032940//secretion by cell	GO:0019139//cytokinin dehydrogenase activity;GO:0050660//flavin adenine dinucleotide binding;GO:0008762//UDP-N-acetylmuramate dehydrogenase activity	GO:0009536//plastid;GO:0016023//cytoplasmic membrane-bounded vesicle;GO:0005576//extracellular region	--
Unigene15281_All	718	13	99	0.8262	6.7237	3.02469	Up	4.39844e-19	1.2903e-17	gi|449527274|ref|XP_004170637.1|	399.1	3e-110	PREDICTED: probable peptide/nitrate transporter At3g54450-like [Cucumis sativus]	gi|449527273|ref|XM_004170589.1|	478	1e-132	PREDICTED: Cucumis sativus probable peptide/nitrate transporter At3g54450-like (LOC101221222), mRNA	sp|Q9M1I2|PTR46_ARATH	266	9e-72	Probable peptide/nitrate transporter At3g54450 OS=Arabidopsis thaliana GN=At3g54450 PE=2 SV=1	--	--	--	--	--	K14638	3e-46	182	gmx:100816253	solute carrier family 15 (peptide/histidine transporter), member 3/4	GO:0006810//transport	-	GO:0005886//plasma membrane	--
Unigene12393_All	332	10	76	1.3745	11.1628	3.02172	Up	6.05278e-15	1.40633e-13	--	--	--	--	gi|401661910|emb|FR714868.1|	60	1e-06	Malus x domestica mitchondrial complete genome, cultivar Golden delicious	--	--	--	--	--	--	--	--	--	--	--	--	--	--	-	-	-	--
Unigene39812_All	558	5	38	0.4089	3.3208	3.02171	Up	4.40108e-08	5.56009e-07	gi|356565119|ref|XP_003550792.1|	36.6	2e-08	PREDICTED: formin-like protein 20-like [Glycine max]	--	--	--	--	sp|Q84ZL0|FH5_ORYSJ	45.4	2e-09	Formin-like protein 5 OS=Oryza sativa subsp. japonica GN=FH5 PE=2 SV=2	Rv0312	51.2	1e-06	COG0443	Molecular chaperone	K01115	2e-09	47.8	vcn:VOLCADRAFT_99471	phospholipase D [EC:3.1.4.4]	-	-	-	--
CL3609.Contig2_All	808	12	91	0.6777	5.492	3.01861	Up	1.28563e-17	3.48835e-16	gi|449450578|ref|XP_004143039.1|	57.8	2e-07	PREDICTED: uncharacterized protein LOC101204468 [Cucumis sativus]	gi|449450577|ref|XM_004142991.1|	71.9	1e-09	PREDICTED: Cucumis sativus uncharacterized LOC101204468 (LOC101204468), mRNA	--	--	--	--	--	--	--	--	--	--	--	--	--	--	-	-	-	--
Unigene7477_All	568	31	235	2.4905	20.1752	3.01808	Up	3.05156e-43	1.93846e-41	gi|449447361|ref|XP_004141437.1|	202.2	3e-51	PREDICTED: putative receptor-like protein kinase At1g72540-like [Cucumis sativus] >gi|449486801|ref|XP_004157407.1| PREDICTED: putative receptor-like protein kinase At1g72540-like [Cucumis sativus]	gi|449447360|ref|XM_004141389.1|	172	3e-40	PREDICTED: Cucumis sativus putative receptor-like protein kinase At1g72540-like (LOC101218136), mRNA >gi|449486800|ref|XM_004157359.1| PREDICTED: Cucumis sativus putative receptor-like protein kinase At1g72540-like (LOC101218136), mRNA	sp|Q9SRH7|Y3130_ARATH	94.4	4e-20	Receptor-like serine/threonine-protein kinase At3g01300 OS=Arabidopsis thaliana GN=At3g01300 PE=2 SV=1	--	--	--	--	--	K05658	8e-17	84.7	vvi:100262734	ATP-binding cassette, subfamily B (MDR/TAP), member 1	GO:0006468//protein phosphorylation	GO:0005524//ATP binding;GO:0004674//protein serine/threonine kinase activity	GO:0005886//plasma membrane	--
Unigene39160_All	1401	9	68	0.2931	2.3668	3.01347	Up	1.79108e-13	3.76422e-12	gi|470145766|ref|XP_004308505.1|	156.4	1e-36	PREDICTED: ethylene-responsive transcription factor 2-like [Fragaria vesca subsp. vesca]	gi|470145765|ref|XM_004308457.1|	111	2e-21	PREDICTED: Fragaria vesca subsp. vesca ethylene-responsive transcription factor 2-like (LOC101292462), mRNA	sp|Q8L9K1|ERF99_ARATH	133	2e-31	Ethylene-responsive transcription factor 13 OS=Arabidopsis thaliana GN=ERF13 PE=2 SV=2	--	--	--	--	--	K09286	1e-28	126	osa:4336571	EREBP-like factor	GO:0009867//jasmonic acid mediated signaling pathway;GO:0009414//response to water deprivation;GO:0010363//regulation of plant-type hypersensitive response;GO:0002679//respiratory burst involved in defense response;GO:0009873//ethylene mediated signaling pathway;GO:0010200//response to chitin;GO:0006355//regulation of transcription, DNA-dependent;GO:0006612//protein targeting to membrane;GO:00430…	GO:0003677//DNA binding;GO:0003700//sequence-specific DNA binding transcription factor activity	GO:0005634//nucleus	--
Unigene4315_All	1104	119	894	4.9188	39.4882	3.00504	Up	3.39304e-159	7.1891e-157	gi|7159629|emb|CAB76364.1|	437.2	2e-121	matrix metalloproteinase [Cucumis sativus]	gi|449531700|ref|XM_004172776.1|	151	2e-33	PREDICTED: Cucumis sativus metalloendoproteinase 1-like (LOC101206689), mRNA	sp|P29136|MEP1_SOYBN	199	2e-51	Metalloendoproteinase 1 OS=Glycine max PE=1 SV=2	--	--	--	--	--	K07761	3e-54	210	ath:AT1G59970	gelatinase A [EC:3.4.24.24]	-	GO:0008233//peptidase activity	-	--
CL3369.Contig2_All	541	12	90	1.0122	8.1123	3.00262	Up	2.35602e-17	6.31408e-16	--	--	--	--	--	--	--	--	--	--	--	--	--	--	--	--	--	--	--	--	--	--	-	-	-	--
Unigene13054_All	355	4	30	0.5142	4.1209	3.00256	Up	1.37614e-06	1.38062e-05	--	--	--	--	gi|449492751|ref|XM_004159042.1|	182	2e-43	PREDICTED: Cucumis sativus MLO-like protein 11-like (LOC101230641), mRNA	--	--	--	--	--	--	--	--	--	--	--	--	--	--	-	-	-	--
Unigene37081_All	277	4	30	0.659	5.2813	3.00254	Up	1.37614e-06	1.38041e-05	--	--	--	--	gi|449515984|ref|XM_004164980.1|	127	6e-27	PREDICTED: Cucumis sativus alcohol dehydrogenase-like 6-like (LOC101231544), mRNA	--	--	--	--	--	--	--	--	--	--	--	--	--	--	-	-	-	--
Unigene10519_All	901	145	1087	7.3438	58.8306	3.00197	Up	5.75074e-193	1.45576e-190	gi|462394667|gb|EMJ00466.1|	98.2	1e-19	hypothetical protein PRUPE_ppa022692mg [Prunus persica]	gi|195650208|gb|EU972454.1|	61.9	1e-06	Zea mays clone 381519 mRNA sequence	--	--	--	--	--	--	--	--	--	--	--	--	--	--	-	-	-	--
CL4581.Contig2_All	1390	34	253	1.1162	8.8757	2.99127	Up	4.91322e-46	3.32412e-44	gi|449459950|ref|XP_004147709.1|	549.3	6e-155	PREDICTED: monoglyceride lipase-like [Cucumis sativus] >gi|449522331|ref|XP_004168180.1| PREDICTED: monoglyceride lipase-like [Cucumis sativus]	gi|449522330|ref|XM_004168132.1|	708	0	PREDICTED: Cucumis sativus monoglyceride lipase-like (LOC101204152), mRNA	--	--	--	--	Rv0183	105	2e-22	COG2267	Lysophospholipase	--	--	--	--	--	GO:0000041//transition metal ion transport	GO:0016787//hydrolase activity	GO:0005737//cytoplasm;GO:0005634//nucleus	--
Unigene15544_All	375	7	52	0.8518	6.7619	2.98884	Up	1.59875e-10	2.65564e-09	--	--	--	--	--	--	--	--	--	--	--	--	--	--	--	--	--	--	--	--	--	--	-	-	-	--
Unigene3134_All	274	7	52	1.1658	9.2545	2.98883	Up	1.59875e-10	2.65499e-09	--	--	--	--	--	--	--	--	--	--	--	--	--	--	--	--	--	--	--	--	--	--	-	-	-	--
CL64.Contig2_All	932	19	141	0.9303	7.3774	2.98734	Up	2.79286e-26	1.12629e-24	gi|449433780|ref|XP_004134675.1|	384	1e-105	PREDICTED: rac-like GTP-binding protein 7-like [Cucumis sativus]	gi|449433779|ref|XM_004134627.1|	648	0	PREDICTED: Cucumis sativus rac-like GTP-binding protein 7-like (LOC101218591), mRNA	sp|Q41253|RAC13_GOSHI	362	1e-100	Rac-like GTP-binding protein RAC13 OS=Gossypium hirsutum GN=RAC13 PE=2 SV=1	SPAC110.03	223	5e-58	COG1100	GTPase SAR1 and related small G proteins	K04392	5e-103	372	rcu:RCOM_1012270	Ras-related C3 botulinum toxin substrate 1	GO:0007264//small GTPase mediated signal transduction	GO:0005525//GTP binding;GO:0004767//sphingomyelin phosphodiesterase activity	GO:0005737//cytoplasm;GO:0005886//plasma membrane	--
CL7907.Contig2_All	1281	10	74	0.3562	2.817	2.9834	Up	2.03286e-14	4.56475e-13	gi|449463280|ref|XP_004149362.1|	231.1	5e-122	PREDICTED: lactoylglutathione lyase-like [Cucumis sativus]	gi|449463279|ref|XM_004149314.1|	333	3e-88	PREDICTED: Cucumis sativus lactoylglutathione lyase-like (LOC101203268), mRNA	sp|Q948T6|LGUL_ORYSJ	155	2e-62	Lactoylglutathione lyase OS=Oryza sativa subsp. japonica GN=GLX-I PE=1 SV=2	NMB0340	63.5	4e-15	COG0346	Lactoylglutathione lyase and related lyases	K01759	1e-66	163	vvi:100257313	lactoylglutathione lyase [EC:4.4.1.5]	-	-	GO:0043231//intracellular membrane-bounded organelle;GO:0044444//cytoplasmic part	--
Unigene6585_All	351	5	37	0.65	5.1404	2.98337	Up	8.09534e-08	9.89611e-07	--	--	--	--	--	--	--	--	--	--	--	--	--	--	--	--	--	--	--	--	--	--	-	-	-	--
Unigene7356_All	660	18	133	1.2445	9.8267	2.98114	Up	8.05066e-25	3.07248e-23	gi|255570954|ref|XP_002526428.1|	301.2	8e-81	conserved hypothetical protein [Ricinus communis] >gi|223534208|gb|EEF35923.1| conserved hypothetical protein [Ricinus communis]	gi|449469648|ref|XM_004152483.1|	200	1e-48	PREDICTED: Cucumis sativus uncharacterized LOC101217402 (LOC101217402), mRNA >gi|449524003|ref|XM_004168965.1| PREDICTED: Cucumis sativus uncharacterized LOC101226845 (LOC101226845), mRNA	sp|Q6NMK1|GXM1_ARATH	288	1e-78	Glucuronoxylan 4-O-methyltransferase 1 OS=Arabidopsis thaliana GN=GXM1 PE=1 SV=1	STM2428	50.4	2e-06	COG3115	Cell division protein	K15174	3e-06	50.1	vvi:100254912	RNA polymerase II-associated factor 1	GO:0045492//xylan biosynthetic process;GO:0010413//glucuronoxylan metabolic process	GO:0030775//glucuronoxylan 4-O-methyltransferase activity	GO:0005794//Golgi apparatus;GO:0005576//extracellular region	--
CL6059.Contig1_All	894	3	22	0.1531	1.2	2.97049	Up	4.42966e-05	0.000327138	gi|462418244|gb|EMJ22693.1|	95.5	1e-52	hypothetical protein PRUPE_ppa009851mg [Prunus persica]	gi|359480229|ref|XM_002280720.2|	73.8	3e-10	PREDICTED: Vitis vinifera suppressor of disruption of TFIIS-like (LOC100257326), mRNA	--	--	--	--	--	--	--	--	--	K07025	2e-48	128	gmx:100814291	putative hydrolase of the HAD superfamily	GO:0010167//response to nitrate;GO:0015706//nitrate transport	-	-	--
Unigene12762_All	330	3	22	0.4148	3.2509	2.97035	Up	4.42966e-05	0.000326995	gi|449530759|ref|XP_004172360.1|	105.9	2e-22	PREDICTED: probable beta-1,3-galactosyltransferase 2-like [Cucumis sativus]	gi|449530758|ref|XM_004172312.1|	159	2e-36	PREDICTED: Cucumis sativus probable beta-1,3-galactosyltransferase 2-like (LOC101216922), mRNA	sp|A8MRC7|B3GT2_ARATH	70.9	2e-13	Probable beta-1,3-galactosyltransferase 2 OS=Arabidopsis thaliana GN=B3GALT2 PE=2 SV=1	--	--	--	--	--	--	--	--	--	--	GO:0006486//protein glycosylation	GO:0008378//galactosyltransferase activity	GO:0005794//Golgi apparatus;GO:0016021//integral to membrane	--
Unigene31411_All	586	6	44	0.4672	3.6615	2.97032	Up	4.84072e-09	6.88509e-08	gi|462409434|gb|EMJ14768.1|	68.2	9e-11	hypothetical protein PRUPE_ppa015744mg [Prunus persica]	--	--	--	--	--	--	--	--	--	--	--	--	--	--	--	--	--	--	-	-	-	--
Unigene39920_All	227	3	22	0.6031	4.726	2.97015	Up	4.42966e-05	0.000327066	--	--	--	--	--	--	--	--	--	--	--	--	--	--	--	--	--	--	--	--	--	--	-	-	-	--
Unigene16235_All	257	3	22	0.5327	4.1743	2.97014	Up	4.42966e-05	0.000327102	gi|255564922|ref|XP_002523454.1|	57.8	6e-08	RNA binding protein, putative [Ricinus communis] >gi|223537282|gb|EEF38913.1| RNA binding protein, putative [Ricinus communis]	--	--	--	--	--	--	--	--	--	--	--	--	--	--	--	--	--	--	-	-	-	--
Unigene39113_All	1833	3	22	0.0747	0.5853	2.97	Up	4.42966e-05	0.00032703	gi|449528407|ref|XP_004171196.1|	930.2	0	PREDICTED: DNA (cytosine-5)-methyltransferase DRM2-like [Cucumis sativus]	gi|449528406|ref|XM_004171148.1|	1027	0	PREDICTED: Cucumis sativus uncharacterized LOC101206985 (LOC101206985), mRNA	sp|Q9M548|DRM2_ARATH	323	2e-88	DNA (cytosine-5)-methyltransferase DRM2 OS=Arabidopsis thaliana GN=DRM2 PE=1 SV=1	--	--	--	--	--	--	--	--	--	--	GO:0006306//DNA methylation	-	-	--
Unigene14754_All	852	13	95	0.6963	5.4373	2.96511	Up	4.93204e-18	1.36564e-16	gi|449440652|ref|XP_004138098.1|	436.4	2e-121	PREDICTED: short-chain dehydrogenase TIC 32, chloroplastic-like [Cucumis sativus]	gi|449440651|ref|XM_004138050.1|	809	0	PREDICTED: Cucumis sativus short-chain dehydrogenase TIC 32, chloroplastic-like (LOC101205419), mRNA	sp|A2RVM0|TIC32_ARATH	215	3e-56	Short-chain dehydrogenase TIC 32, chloroplastic OS=Arabidopsis thaliana GN=TIC32 PE=2 SV=1	Rv0068	126	5e-29	COG1028	Dehydrogenases with different specificities (related to short-chain alcohol dehydrogenases)	K00218	8e-24	108	ppp:PHYPADRAFT_217750	protochlorophyllide reductase [EC:1.3.1.33]	GO:0055114//oxidation-reduction process	GO:0016630//protochlorophyllide reductase activity;GO:0000166//nucleotide binding	GO:0005634//nucleus	--
Unigene10984_All	208	20	146	4.3878	34.2285	2.96363	Up	5.90126e-27	2.43951e-25	--	--	--	--	--	--	--	--	--	--	--	--	--	--	--	--	--	--	--	--	--	--	-	-	-	--
Unigene14043_All	483	17	124	1.6061	12.5191	2.9625	Up	4.24018e-23	1.50204e-21	--	--	--	--	--	--	--	--	--	--	--	--	--	--	--	--	--	--	--	--	--	--	-	-	-	--
Unigene23886_All	1703	308	2237	8.2531	64.0545	2.95629	Up	0	0	gi|449526291|ref|XP_004170147.1|	871.3	0	PREDICTED: cytochrome P450 705A5-like [Cucumis sativus]	gi|449526290|ref|XM_004170099.1|	1217	0	PREDICTED: Cucumis sativus cytochrome P450 705A5-like (LOC101210137), mRNA	sp|Q9FI39|THAD_ARATH	455	3e-128	Cytochrome P450 705A5 OS=Arabidopsis thaliana GN=CYP705A5 PE=2 SV=1	AGc2890	101	5e-21	COG2124	Cytochrome P450	K00517	1e-131	468	ath:AT4G15350	[EC:1.14.-.-]	-	GO:0016491//oxidoreductase activity;GO:0005488//binding	-	--
CL222.Contig2_All	461	4	29	0.3959	3.0676	2.9539	Up	2.53136e-06	2.42443e-05	gi|449459098|ref|XP_004147283.1|	256.1	1e-67	PREDICTED: uncharacterized protein LOC101218484 [Cucumis sativus] >gi|449501230|ref|XP_004161313.1| PREDICTED: uncharacterized LOC101218484 [Cucumis sativus]	gi|449459097|ref|XM_004147235.1|	502	1e-139	PREDICTED: Cucumis sativus uncharacterized LOC101218484 (LOC101218484), mRNA >gi|449501229|ref|XM_004161265.1| PREDICTED: Cucumis sativus uncharacterized LOC101218484 (LOC101218484), mRNA	--	--	--	--	--	--	--	--	--	--	--	--	--	--	GO:0010027//thylakoid membrane organization;GO:0019252//starch biosynthetic process;GO:0000023//maltose metabolic process	-	GO:0009507//chloroplast	--
Unigene2491_All	468	4	29	0.39	3.0217	2.95381	Up	2.53136e-06	2.42409e-05	--	--	--	--	--	--	--	--	--	--	--	--	--	--	--	--	--	--	--	--	--	--	-	-	-	--
Unigene3077_All	300	4	29	0.6084	4.7138	2.9538	Up	2.53136e-06	2.42374e-05	--	--	--	--	--	--	--	--	--	--	--	--	--	--	--	--	--	--	--	--	--	--	-	-	-	--
Unigene31921_All	311	4	29	0.5869	4.5471	2.95376	Up	2.53136e-06	2.4234e-05	--	--	--	--	--	--	--	--	--	--	--	--	--	--	--	--	--	--	--	--	--	--	-	-	-	--
Unigene29168_All	218	4	29	0.8373	6.4869	2.95371	Up	2.53136e-06	2.42306e-05	--	--	--	--	--	--	--	--	--	--	--	--	--	--	--	--	--	--	--	--	--	--	-	-	-	--
CL2137.Contig1_All	765	67	485	3.9966	30.9157	2.95149	Up	1.29247e-85	1.57116e-83	gi|449467497|ref|XP_004151459.1|	101.7	2e-48	PREDICTED: cucumber peeling cupredoxin-like [Cucumis sativus] >gi|449482646|ref|XP_004156359.1| PREDICTED: cucumber peeling cupredoxin-like [Cucumis sativus]	gi|449467496|ref|XM_004151411.1|	143	3e-31	PREDICTED: Cucumis sativus cucumber peeling cupredoxin-like (LOC101206568), mRNA >gi|449482645|ref|XM_004156311.1| PREDICTED: Cucumis sativus cucumber peeling cupredoxin-like (LOC101206568), mRNA	sp|P29602|CPC_CUCSA	49.7	1e-12	Cucumber peeling cupredoxin OS=Cucumis sativus PE=1 SV=3	--	--	--	--	--	--	--	--	--	--	-	-	-	--
Unigene31131_All	343	19	137	2.5278	19.4771	2.94582	Up	3.09142e-25	1.19808e-23	gi|449457253|ref|XP_004146363.1|	104.8	4e-22	PREDICTED: uncharacterized protein LOC101210202 [Cucumis sativus]	gi|334186925|ref|NM_001203913.1|	58	6e-06	Arabidopsis thaliana OSBP(oxysterol binding protein)-related protein 4B (ORP4B) mRNA, complete cds	--	--	--	--	--	--	--	--	--	--	--	--	--	--	GO:0008202//steroid metabolic process	GO:0008142//oxysterol binding	GO:0005634//nucleus	--
CL4616.Contig5_All	1035	5	36	0.2204	1.6961	2.94403	Up	1.48487e-07	1.74936e-06	gi|449497054|ref|XP_004160299.1|	405.2	9e-112	PREDICTED: DUF246 domain-containing protein At1g04910-like [Cucumis sativus]	gi|449497053|ref|XM_004160251.1|	749	0	PREDICTED: Cucumis sativus DUF246 domain-containing protein At1g04910-like (LOC101229600), mRNA	sp|Q8W486|Y1491_ARATH	124	1e-28	Uncharacterized protein At1g04910 OS=Arabidopsis thaliana GN=At1g04910 PE=1 SV=1	--	--	--	--	--	--	--	--	--	--	-	-	GO:0005739//mitochondrion	--
Unigene9672_All	306	5	36	0.7456	5.7369	2.9438	Up	1.48487e-07	1.74906e-06	--	--	--	--	--	--	--	--	--	--	--	--	--	--	--	--	--	--	--	--	--	--	-	-	-	--
Unigene9597_All	321	5	36	0.7108	5.4689	2.94374	Up	1.48487e-07	1.74875e-06	gi|449530136|ref|XP_004172052.1|	169.5	1e-41	PREDICTED: uncharacterized protein LOC101232653 [Cucumis sativus]	gi|449530135|ref|XM_004172004.1|	210	6e-52	PREDICTED: Cucumis sativus uncharacterized LOC101232653 (LOC101232653), mRNA	--	--	--	--	--	--	--	--	--	--	--	--	--	--	GO:0048767//root hair elongation	-	GO:0005886//plasma membrane;GO:0009507//chloroplast	--
CL5767.Contig1_All	247	144	1034	26.6039	204.137	2.93983	Up	8.38166e-180	1.9808e-177	gi|449442393|ref|XP_004138966.1|	169.1	1e-41	PREDICTED: adenosylhomocysteinase-like [Cucumis sativus] >gi|449505280|ref|XP_004162424.1| PREDICTED: adenosylhomocysteinase-like [Cucumis sativus]	gi|449432383|ref|XM_004133931.1|	276	1e-71	PREDICTED: Cucumis sativus adenosylhomocysteinase-like (LOC101209658), mRNA	sp|Q01781|SAHH_PETCR	159	5e-40	Adenosylhomocysteinase OS=Petroselinum crispum GN=SAHH PE=2 SV=2	Rv3248c	66.6	1e-11	COG0499	S-adenosylhomocysteine hydrolase	K01251	2e-42	168	pop:POPTR_707148	adenosylhomocysteinase [EC:3.3.1.1]	GO:0006730//one-carbon metabolic process;GO:0016441//posttranscriptional gene silencing;GO:0006346//methylation-dependent chromatin silencing	GO:0005507//copper ion binding;GO:0004013//adenosylhomocysteinase activity;GO:0000166//nucleotide binding	GO:0005773//vacuole;GO:0005886//plasma membrane	--
Unigene2150_All	299	6	43	0.9157	7.0129	2.93706	Up	8.86136e-09	1.22481e-07	--	--	--	--	--	--	--	--	--	--	--	--	--	--	--	--	--	--	--	--	--	--	-	-	-	--
CL3533.Contig1_All	393	6	43	0.6967	5.3355	2.93701	Up	8.86136e-09	1.22506e-07	gi|449433337|ref|XP_004134454.1|	199.9	1e-50	PREDICTED: DEAD-box ATP-dependent RNA helicase 58, chloroplastic-like [Cucumis sativus] >gi|449531697|ref|XP_004172822.1| PREDICTED: DEAD-box ATP-dependent RNA helicase 58, chloroplastic-like [Cucumis sativus]	gi|449531696|ref|XM_004172774.1|	420	1e-115	PREDICTED: Cucumis sativus DEAD-box ATP-dependent RNA helicase 58, chloroplastic-like (LOC101202973), mRNA	sp|Q3E9C3|RH58_ARATH	172	7e-44	DEAD-box ATP-dependent RNA helicase 58, chloroplastic OS=Arabidopsis thaliana GN=RH58 PE=2 SV=1	RSc0952	76.6	1e-14	COG0513	Superfamily II DNA and RNA helicases	K03257	3e-12	68.6	olu:OSTLU_32748	translation initiation factor 4A	-	GO:0008026//ATP-dependent helicase activity;GO:0003676//nucleic acid binding;GO:0005524//ATP binding	GO:0009507//chloroplast	--
CL3247.Contig2_All	736	175	1249	10.8502	82.7529	2.93109	Up	3.87044e-216	1.09e-213	gi|462411340|gb|EMJ16389.1|	166.4	4e-40	hypothetical protein PRUPE_ppa013959mg [Prunus persica]	gi|449445195|ref|XM_004140311.1|	184	9e-44	PREDICTED: Cucumis sativus protein RSI-1-like (LOC101208219), mRNA	sp|P47926|RSI1_SOLLC	150	7e-37	Protein RSI-1 OS=Solanum lycopersicum GN=RSI-1 PE=2 SV=1	--	--	--	--	--	--	--	--	--	--	-	-	-	--
Unigene8752_All	339	10	71	1.3461	10.2131	2.92356	Up	1.2371e-13	2.62855e-12	gi|449466538|ref|XP_004150983.1|	117.9	5e-26	PREDICTED: ethylene-responsive transcription factor 1B-like [Cucumis sativus] >gi|449534102|ref|XP_004174007.1| PREDICTED: ethylene-responsive transcription factor 1B-like [Cucumis sativus]	gi|449466537|ref|XM_004150935.1|	208	3e-51	PREDICTED: Cucumis sativus ethylene-responsive transcription factor 1B-like (LOC101206564), mRNA >gi|449534101|ref|XM_004173959.1| PREDICTED: Cucumis sativus ethylene-responsive transcription factor 1B-like (LOC101206564), mRNA	sp|Q8LDC8|ERF92_ARATH	70.5	2e-13	Ethylene-responsive transcription factor 1B OS=Arabidopsis thaliana GN=ERF1B PE=1 SV=2	--	--	--	--	--	K14516	4e-13	70.9	rcu:RCOM_1007740	ethylene-responsive transcription factor 1	GO:0006952//defense response;GO:0009867//jasmonic acid mediated signaling pathway;GO:0006355//regulation of transcription, DNA-dependent;GO:0009873//ethylene mediated signaling pathway	GO:0003677//DNA binding;GO:0003700//sequence-specific DNA binding transcription factor activity	GO:0005634//nucleus	--
Unigene21492_All	585	22	156	1.7161	13.0037	2.92172	Up	2.60828e-28	1.12862e-26	--	--	--	--	--	--	--	--	--	--	--	--	--	--	--	--	--	--	--	--	--	--	-	-	-	--
Unigene11822_All	353	12	85	1.5513	11.742	2.92013	Up	4.77786e-16	1.1855e-14	--	--	--	--	--	--	--	--	--	--	--	--	--	--	--	--	--	--	--	--	--	--	-	-	-	--
CL2412.Contig2_All	1593	26	184	0.7448	5.6325	2.91885	Up	4.2724e-33	2.12017e-31	gi|449443620|ref|XP_004139575.1|	797.7	0	PREDICTED: cytochrome P450 94A1-like [Cucumis sativus] >gi|449501663|ref|XP_004161430.1| PREDICTED: LOW QUALITY PROTEIN: cytochrome P450 94A1-like [Cucumis sativus]	gi|449443619|ref|XM_004139527.1|	287	2e-74	PREDICTED: Cucumis sativus cytochrome P450 94A1-like (LOC101207724), mRNA >gi|449501662|ref|XM_004161382.1| PREDICTED: Cucumis sativus cytochrome P450 94A1-like (LOC101207724), mRNA	sp|O81117|C94A1_VICSA	379	3e-105	Cytochrome P450 94A1 OS=Vicia sativa GN=CYP94A1 PE=2 SV=2	BH0579	140	6e-33	COG2124	Cytochrome P450	K13407	5e-114	409	vvi:100259592	cytochrome P450, family 94, subfamily A, polypeptide 1 (fatty acid omega-hydroxylase) [EC:1.14.-.-]	GO:0055114//oxidation-reduction process	GO:0020037//heme binding;GO:0005506//iron ion binding;GO:0009055//electron carrier activity;GO:0070330//aromatase activity;GO:0018685//alkane 1-monooxygenase activity	-	--
Unigene28138_All	320	16	113	2.2817	17.2198	2.91589	Up	7.38668e-21	2.36391e-19	--	--	--	--	--	--	--	--	--	--	--	--	--	--	--	--	--	--	--	--	--	--	-	-	-	--
CL1698.Contig2_All	572	3	21	0.2393	1.7903	2.90331	Up	8.14834e-05	0.000564802	gi|449443011|ref|XP_004139274.1|	154.1	1e-36	PREDICTED: uncharacterized protein LOC101212304 [Cucumis sativus] >gi|449493661|ref|XP_004159399.1| PREDICTED: uncharacterized protein LOC101226973 [Cucumis sativus]	gi|449493660|ref|XM_004159351.1|	246	2e-62	PREDICTED: Cucumis sativus uncharacterized LOC101226973 (LOC101226973), mRNA	--	--	--	--	--	--	--	--	--	--	--	--	--	--	GO:0007165//signal transduction;GO:0019344//cysteine biosynthetic process	GO:0035091//phosphatidylinositol binding	GO:0005886//plasma membrane;GO:0005634//nucleus;GO:0005829//cytosol	--
Unigene28424_All	359	3	21	0.3813	2.8525	2.90323	Up	8.14834e-05	0.000564512	gi|449529036|ref|XP_004171507.1|	126.3	1e-28	PREDICTED: uncharacterized LOC101205819, partial [Cucumis sativus]	--	--	--	--	sp|Q6AWW5|Y5262_ARATH	45.1	1e-05	Ankyrin repeat-containing protein At5g02620 OS=Arabidopsis thaliana GN=At5g02620 PE=1 SV=1	--	--	--	--	--	--	--	--	--	--	-	-	-	--
CL2519.Contig4_All	926	4	28	0.1971	1.4745	2.90323	Up	4.63992e-06	4.23966e-05	gi|449455617|ref|XP_004145549.1|	245.4	1e-63	PREDICTED: glutamate receptor 3.3-like [Cucumis sativus] >gi|449485091|ref|XP_004157067.1| PREDICTED: glutamate receptor 3.3-like [Cucumis sativus]	gi|449485090|ref|XM_004157019.1|	452	1e-124	PREDICTED: Cucumis sativus glutamate receptor 3.3-like (LOC101204862), mRNA	sp|Q9C8E7|GLR33_ARATH	168	5e-42	Glutamate receptor 3.3 OS=Arabidopsis thaliana GN=GLR3.3 PE=2 SV=1	--	--	--	--	--	K05387	1e-41	168	ath:AT1G42540	glutamate receptor, ionotropic, other eukaryote	GO:0009416//response to light stimulus;GO:0035235//ionotropic glutamate receptor signaling pathway;GO:0006874//cellular calcium ion homeostasis;GO:0006816//calcium ion transport;GO:0071230//cellular response to amino acid stimulus;GO:0009630//gravitropism;GO:0007186//G-protein coupled receptor signaling pathway	GO:0005234//extracellular-glutamate-gated ion channel activity;GO:0004970//ionotropic glutamate receptor activity;GO:0005262//calcium channel activity;GO:0005217//intracellular ligand-gated ion channel activity;GO:0004930//G-protein coupled receptor activity	GO:0030288//outer membrane-bounded periplasmic space;GO:0016021//integral to membrane;GO:0005576//extracellular region	--
Unigene25693_All	284	3	21	0.482	3.6058	2.90321	Up	8.14834e-05	0.000564918	--	--	--	--	--	--	--	--	--	--	--	--	--	--	--	--	--	--	--	--	--	--	-	-	-	--
CL8535.Contig1_All	886	3	21	0.1545	1.1558	2.90321	Up	8.14834e-05	0.000564744	gi|449441572|ref|XP_004138556.1|	408.7	6e-113	PREDICTED: BTB/POZ domain-containing protein At3g56230-like [Cucumis sativus] >gi|449499220|ref|XP_004160755.1| PREDICTED: BTB/POZ domain-containing protein At3g56230-like [Cucumis sativus]	gi|449499219|ref|XM_004160707.1|	204	1e-49	PREDICTED: Cucumis sativus BTB/POZ domain-containing protein At3g56230-like (LOC101223408), mRNA	sp|Q9LYL9|Y3623_ARATH	275	3e-74	BTB/POZ domain-containing protein At3g56230 OS=Arabidopsis thaliana GN=At3g56230 PE=2 SV=1	--	--	--	--	--	K10523	3e-10	63.9	olu:OSTLU_4529	speckle-type POZ protein	GO:0045492//xylan biosynthetic process;GO:0010413//glucuronoxylan metabolic process	-	GO:0005634//nucleus	--
Unigene39528_All	274	3	21	0.4996	3.7374	2.90319	Up	8.14834e-05	0.000564454	gi|384248773|gb|EIE22256.1|	91.3	5e-18	hypothetical protein COCSUDRAFT_55952 [Coccomyxa subellipsoidea C-169]	gi|270135505|gb|BT102457.1|	131	4e-28	Picea glauca clone GQ0193_N13 mRNA sequence	--	--	--	--	--	--	--	--	--	--	--	--	--	--	-	-	-	--
Unigene2469_All	268	3	21	0.5108	3.8211	2.90316	Up	8.14834e-05	0.00056486	gi|449520185|ref|XP_004167114.1|	176.8	9e-44	PREDICTED: uncharacterized LOC101207849 [Cucumis sativus]	gi|449520184|ref|XM_004167066.1|	365	1e-98	PREDICTED: Cucumis sativus uncharacterized LOC101207849 (LOC101207849), mRNA	--	--	--	--	--	--	--	--	--	K14692	4e-34	140	vvi:100252487	solute carrier family 30 (zinc transporter), member 5	GO:0006812//cation transport;GO:0055085//transmembrane transport	GO:0015562//efflux transmembrane transporter activity;GO:0008324//cation transmembrane transporter activity	GO:0016021//integral to membrane	--
Unigene25551_All	301	3	21	0.4548	3.4021	2.90312	Up	8.14834e-05	0.000564397	gi|356527433|ref|XP_003532315.1|	208.4	2e-53	PREDICTED: laccase-17-like [Glycine max]	gi|449517600|ref|XM_004165786.1|	192	1e-46	PREDICTED: Cucumis sativus laccase-17-like (LOC101230661), mRNA	sp|Q9FJD5|LAC17_ARATH	192	4e-50	Laccase-17 OS=Arabidopsis thaliana GN=LAC17 PE=2 SV=1	YFL041w	53.1	1e-07	COG2132	Putative multicopper oxidases	K00423	2e-09	58.5	vvi:100251280	L-ascorbate oxidase [EC:1.10.3.3]	GO:0046274//lignin catabolic process;GO:0055114//oxidation-reduction process	GO:0052716//hydroquinone:oxygen oxidoreductase activity;GO:0005507//copper ion binding	GO:0048046//apoplast	--
Unigene1061_All	681	39	273	2.6133	19.5485	2.90311	Up	4.19398e-48	2.97447e-46	gi|449448667|ref|XP_004142087.1|	229.2	4e-59	PREDICTED: zinc finger protein ZAT11-like [Cucumis sativus] >gi|449502584|ref|XP_004161684.1| PREDICTED: zinc finger protein ZAT11-like [Cucumis sativus]	gi|116633395|emb|CT833199.1|	113	2e-22	Oryza sativa (indica cultivar-group) cDNA clone:OSIGCSN044A18, full insert sequence	sp|Q9SLD4|ZAT11_ARATH	147	5e-36	Zinc finger protein ZAT11 OS=Arabidopsis thaliana GN=ZAT11 PE=2 SV=1	--	--	--	--	--	--	--	--	--	--	-	-	-	--
CL14.Contig2_All	510	4	28	0.3579	2.6772	2.9031	Up	4.63992e-06	4.24023e-05	--	--	--	--	gi|449485050|ref|XR_180963.1|	63.9	2e-07	PREDICTED: Cucumis sativus uncharacterized LOC101230186 (LOC101230186), misc_RNA	--	--	--	--	--	--	--	--	--	--	--	--	--	--	-	-	-	--
Unigene39318_All	223	3	21	0.6139	4.5921	2.90308	Up	8.14834e-05	0.00056457	--	--	--	--	--	--	--	--	--	--	--	--	--	--	--	--	--	--	--	--	--	--	-	-	-	--
Unigene39400_All	249	3	21	0.5498	4.1126	2.90307	Up	8.14834e-05	0.000564628	--	--	--	--	--	--	--	--	--	--	--	--	--	--	--	--	--	--	--	--	--	--	-	-	-	--
Unigene2794_All	204	5	35	1.1185	8.3664	2.90304	Up	2.71558e-07	3.07649e-06	--	--	--	--	--	--	--	--	--	--	--	--	--	--	--	--	--	--	--	--	--	--	-	-	-	--
Unigene22475_All	470	4	28	0.3884	2.9051	2.90297	Up	4.63992e-06	4.24081e-05	--	--	--	--	--	--	--	--	--	--	--	--	--	--	--	--	--	--	--	--	--	--	-	-	-	--
Unigene22395_All	264	3	21	0.5186	3.8789	2.90295	Up	8.14834e-05	0.000564686	gi|147815400|emb|CAN65491.1|	56.2	1e-07	hypothetical protein VITISV_003157 [Vitis vinifera]	--	--	--	--	--	--	--	--	--	--	--	--	--	--	--	--	--	--	-	-	-	--
CL960.Contig4_All	1042	3	21	0.1314	0.9828	2.90293	Up	8.14834e-05	0.000564976	gi|449446656|ref|XP_004141087.1|	280.8	2e-74	PREDICTED: uncharacterized protein LOC101213103 isoform 1 [Cucumis sativus] >gi|449528134|ref|XP_004171061.1| PREDICTED: uncharacterized protein LOC101226705 isoform 1 [Cucumis sativus]	gi|449528133|ref|XM_004171013.1|	505	1e-140	PREDICTED: Cucumis sativus uncharacterized LOC101226705, transcript variant 1 (LOC101226705), mRNA	--	--	--	--	--	--	--	--	--	--	--	--	--	--	GO:0010027//thylakoid membrane organization;GO:0000023//maltose metabolic process;GO:0019252//starch biosynthetic process;GO:0043085//positive regulation of catalytic activity	-	GO:0005739//mitochondrion;GO:0009941//chloroplast envelope;GO:0009570//chloroplast stroma;GO:0005634//nucleus	--
CL4662.Contig2_All	1610	68	475	1.9274	14.3869	2.90003	Up	2.0938e-82	2.43576e-80	gi|449460876|ref|XP_004148170.1|	817.8	0	PREDICTED: uncharacterized protein LOC101220068 [Cucumis sativus]	gi|449460875|ref|XM_004148122.1|	1100	0	PREDICTED: Cucumis sativus uncharacterized LOC101220068 (LOC101220068), mRNA	--	--	--	--	--	--	--	--	--	--	--	--	--	--	GO:0009878//nodule morphogenesis	GO:0046872//metal ion binding	GO:0009507//chloroplast	--
Unigene16869_All	2225	166	1155	3.4045	25.3134	2.89439	Up	1.95381e-197	5.07909e-195	gi|449466344|ref|XP_004150886.1|	108.6	0	PREDICTED: LOW QUALITY PROTEIN: UDP-glucuronate:xylan alpha-glucuronosyltransferase 2-like [Cucumis sativus]	gi|449466343|ref|XM_004150838.1|	1045	0	PREDICTED: Cucumis sativus UDP-glucuronate:xylan alpha-glucuronosyltransferase 2-like (LOC101220791), mRNA	sp|Q8GWW4|GUX2_ARATH	751	0	UDP-glucuronate:xylan alpha-glucuronosyltransferase 2 OS=Arabidopsis thaliana GN=GUX2 PE=2 SV=1	SMc04081	91.7	5e-18	COG5597	Alpha-N-acetylglucosamine transferase	K00750	0	844	rcu:RCOM_1590700	glycogenin glucosyltransferase [EC:2.4.1.186]	GO:0010417//glucuronoxylan biosynthetic process;GO:0005982//starch metabolic process;GO:0010014//meristem initiation;GO:0009834//secondary cell wall biogenesis;GO:0010089//xylem development	GO:0080116//glucuronoxylan glucuronosyltransferase activity;GO:0008466//glycogenin glucosyltransferase activity	GO:0005794//Golgi apparatus	--
Unigene16975_All	974	50	347	2.3426	17.3728	2.89065	Up	1.90273e-60	1.66369e-58	gi|449463820|ref|XP_004149629.1|	347.4	2e-94	PREDICTED: 3-oxoacyl-[acyl-carrier-protein] reductase FabG-like [Cucumis sativus] >gi|449494640|ref|XP_004159606.1| PREDICTED: 3-oxoacyl-[acyl-carrier-protein] reductase FabG-like [Cucumis sativus]	gi|449463819|ref|XM_004149581.1|	198	8e-48	PREDICTED: Cucumis sativus 3-oxoacyl-[acyl-carrier-protein] reductase FabG-like (LOC101213383), mRNA >gi|449494639|ref|XM_004159558.1| PREDICTED: Cucumis sativus 3-oxoacyl-[acyl-carrier-protein] reductase FabG-like (LOC101213383), mRNA	sp|P28643|FABG_CUPLA	94.7	7e-20	3-oxoacyl-[acyl-carrier-protein] reductase, chloroplastic OS=Cuphea lanceolata GN=CLKR27 PE=2 SV=1	all1884	191	2e-48	COG1028	Dehydrogenases with different specificities (related to short-chain alcohol dehydrogenases)	K00059	2e-21	101	mtr:MTR_3g085740	3-oxoacyl-[acyl-carrier protein] reductase [EC:1.1.1.100]	GO:0000038//very long-chain fatty acid metabolic process;GO:0042335//cuticle development;GO:0055114//oxidation-reduction process;GO:0009409//response to cold;GO:0006760//folic acid-containing compound metabolic process	GO:0016616//oxidoreductase activity, acting on the CH-OH group of donors, NAD or NADP as acceptor;GO:0000166//nucleotide binding	GO:0005829//cytosol;GO:0009507//chloroplast	--
Unigene16208_All	279	15	104	2.4534	18.1772	2.88928	Up	3.87022e-19	1.13831e-17	--	--	--	--	--	--	--	--	--	--	--	--	--	--	--	--	--	--	--	--	--	--	-	-	-	--
Unigene21318_All	847	373	2567	20.0958	147.789	2.87857	Up	0	0	gi|55294660|emb|CAH69227.1|	307.8	1e-82	putative adenosylhomocysteinase [Nicotiana glauca]	gi|449432383|ref|XM_004133931.1|	527	1e-147	PREDICTED: Cucumis sativus adenosylhomocysteinase-like (LOC101209658), mRNA	sp|P68173|SAHH_TOBAC	307	4e-84	Adenosylhomocysteinase OS=Nicotiana tabacum GN=SAHH PE=2 SV=1	CC0257	198	1e-50	COG0499	S-adenosylhomocysteine hydrolase	K01251	4e-82	302	vvi:100253872	adenosylhomocysteinase [EC:3.3.1.1]	GO:0006346//methylation-dependent chromatin silencing;GO:0006816//calcium ion transport;GO:0009651//response to salt stress;GO:0006730//one-carbon metabolic process;GO:0007030//Golgi organization;GO:0016441//posttranscriptional gene silencing;GO:0019344//cysteine biosynthetic process	GO:0000166//nucleotide binding;GO:0004013//adenosylhomocysteinase activity;GO:0005507//copper ion binding	GO:0005773//vacuole;GO:0005829//cytosol;GO:0005886//plasma membrane	--
Unigene25197_All	504	16	110	1.4487	10.6429	2.87706	Up	4.4121e-20	1.3592e-18	gi|449478700|ref|XP_004155396.1|	135.2	4e-31	PREDICTED: uncharacterized protein LOC101230181 [Cucumis sativus]	gi|449478699|ref|XM_004155348.1|	349	2e-93	PREDICTED: Cucumis sativus uncharacterized LOC101230181 (LOC101230181), mRNA	sp|Q9LK03|PERK2_ARATH	51.6	2e-07	Proline-rich receptor-like protein kinase PERK2 OS=Arabidopsis thaliana GN=PERK2 PE=2 SV=3	--	--	--	--	--	--	--	--	--	--	-	-	-	--
CL7005.Contig2_All	1142	298	2047	11.9077	87.4078	2.87587	Up	0	0	gi|449460054|ref|XP_004147761.1|	374.8	1e-102	PREDICTED: probable glutathione S-transferase-like [Cucumis sativus] >gi|449502156|ref|XP_004161559.1| PREDICTED: probable glutathione S-transferase-like [Cucumis sativus]	gi|23978425|dbj|AB055116.1|	448	1e-123	Cucurbita maxima Puga mRNA for glutathione S-transferase, complete cds	sp|Q03666|GSTX4_TOBAC	341	4e-94	Probable glutathione S-transferase OS=Nicotiana tabacum PE=2 SV=1	STM3342	77	6e-14	COG0625	Glutathione S-transferase	K00799	5e-89	326	gmx:547936	glutathione S-transferase [EC:2.5.1.18]	-	-	-	--
CL8417.Contig7_All	1029	570	3912	25.2778	185.388	2.87461	Up	0	0	gi|449441252|ref|XP_004138396.1|	475.3	7e-133	PREDICTED: expansin-A8-like [Cucumis sativus] >gi|449514724|ref|XP_004164462.1| PREDICTED: expansin-A8-like [Cucumis sativus]	gi|449514723|ref|XM_004164414.1|	680	0	PREDICTED: Cucumis sativus expansin-A8-like (LOC101230595), mRNA	sp|O22874|EXPA8_ARATH	428	3e-120	Expansin-A8 OS=Arabidopsis thaliana GN=EXPA8 PE=2 SV=1	--	--	--	--	--	--	--	--	--	--	GO:0009664//plant-type cell wall organization;GO:0006949//syncytium formation	-	GO:0005576//extracellular region;GO:0016020//membrane	--
Unigene18681_All	525	6	41	0.5215	3.8082	2.86837	Up	2.94668e-08	3.81174e-07	--	--	--	--	--	--	--	--	--	--	--	--	--	--	--	--	--	--	--	--	--	--	-	-	-	--
Unigene39508_All	524	12	82	1.045	7.631	2.86837	Up	2.8604e-15	6.79549e-14	--	--	--	--	--	--	--	--	--	--	--	--	--	--	--	--	--	--	--	--	--	--	-	-	-	--
Unigene18889_All	510	12	82	1.0737	7.8405	2.86835	Up	2.8604e-15	6.7931e-14	gi|307136218|gb|ADN34055.1|	316.6	1e-85	galactosyltransferase [Cucumis melo subsp. melo]	gi|449488342|ref|XM_004157959.1|	480	1e-133	PREDICTED: Cucumis sativus probable beta-1,3-galactosyltransferase 2-like (LOC101224918), mRNA	sp|A8MRC7|B3GT2_ARATH	281	1e-76	Probable beta-1,3-galactosyltransferase 2 OS=Arabidopsis thaliana GN=B3GALT2 PE=2 SV=1	--	--	--	--	--	--	--	--	--	--	GO:0006486//protein glycosylation	GO:0047220//galactosylxylosylprotein 3-beta-galactosyltransferase activity	GO:0005794//Golgi apparatus;GO:0016021//integral to membrane	--
Unigene6089_All	699	11	75	0.7181	5.2322	2.86516	Up	4.59768e-14	1.00796e-12	gi|449521655|ref|XP_004167845.1|	385.2	5e-106	PREDICTED: auxin-induced protein 5NG4-like [Cucumis sativus]	gi|449521654|ref|XM_004167797.1|	549	1e-153	PREDICTED: Cucumis sativus auxin-induced protein 5NG4-like (LOC101208640), mRNA	sp|O80638|WTR14_ARATH	261	3e-70	WAT1-related protein At2g39510 OS=Arabidopsis thaliana GN=At2g39510 PE=2 SV=1	TM1017	51.6	1e-06	COG0697	Permeases of the drug/metabolite transporter (DMT) superfamily	--	--	--	--	--	-	-	GO:0016020//membrane;GO:0005576//extracellular region	--
Unigene9077_All	571	11	75	0.8791	6.4051	2.86512	Up	4.59768e-14	1.00763e-12	gi|449520048|ref|XP_004167046.1|	181.8	5e-45	PREDICTED: mitogen-activated protein kinase kinase kinase A-like [Cucumis sativus]	gi|449520047|ref|XM_004166998.1|	135	6e-29	PREDICTED: Cucumis sativus mitogen-activated protein kinase kinase kinase A-like (LOC101205351), mRNA	--	--	--	--	--	--	--	--	--	K13414	5e-06	48.9	sbi:SORBI_01g040360	mitogen-activated protein kinase kinase kinase 1, plant [EC:2.7.11.25]	GO:0006468//protein phosphorylation	GO:0004674//protein serine/threonine kinase activity;GO:0000166//nucleotide binding	-	--
CL5973.Contig2_All	1099	5	34	0.2076	1.5086	2.86133	Up	4.95094e-07	5.36436e-06	gi|449520335|ref|XP_004167189.1|	183	1e-125	PREDICTED: single-stranded DNA-binding protein WHY1, chloroplastic-like [Cucumis sativus]	gi|449520334|ref|XM_004167141.1|	404	1e-110	PREDICTED: Cucumis sativus single-stranded DNA-bindig protein WHY1, chloroplastic-like (LOC101203474), mRNA	sp|Q9M9S3|WHY1_ARATH	173	6e-85	Single-stranded DNA-binding protein WHY1, chloroplastic OS=Arabidopsis thaliana GN=WHY1 PE=1 SV=1	--	--	--	--	--	--	--	--	--	--	GO:0032211//negative regulation of telomere maintenance via telomerase;GO:0050832//defense response to fungus;GO:0045893//positive regulation of transcription, DNA-dependent;GO:0006281//DNA repair	GO:0042162//telomeric DNA binding;GO:0003697//single-stranded DNA binding;GO:0003700//sequence-specific DNA binding transcription factor activity	GO:0009508//plastid chromosome;GO:0009570//chloroplast stroma;GO:0005634//nucleus	--
Unigene5698_All	215	5	34	1.0612	7.7115	2.86131	Up	4.95094e-07	5.36609e-06	--	--	--	--	--	--	--	--	--	--	--	--	--	--	--	--	--	--	--	--	--	--	-	-	-	--
Unigene13466_All	1378	5	34	0.1656	1.2032	2.8611	Up	4.95094e-07	5.36523e-06	gi|449436323|ref|XP_004135942.1|	746.9	0	PREDICTED: polyamine oxidase 1-like [Cucumis sativus] >gi|449488827|ref|XP_004158184.1| PREDICTED: polyamine oxidase 1-like [Cucumis sativus]	gi|449488826|ref|XM_004158136.1|	1392	0	PREDICTED: Cucumis sativus polyamine oxidase 1-like (LOC101229967), mRNA	sp|Q9FNA2|PAO1_ARATH	617	4e-177	Polyamine oxidase 1 OS=Arabidopsis thaliana GN=PAO1 PE=1 SV=1	--	--	--	--	--	K13366	0	673	rcu:RCOM_0964720	polyamine oxidase (propane-1,3-diamine-forming) [EC:1.5.3.14]	GO:0006598//polyamine catabolic process;GO:0055114//oxidation-reduction process	GO:0050660//flavin adenine dinucleotide binding;GO:0046592//polyamine oxidase activity	GO:0005739//mitochondrion	--
CL6224.Contig4_All	1781	347	2348	8.8909	64.2884	2.85416	Up	0	0	gi|449439745|ref|XP_004137646.1|	955.3	0	PREDICTED: 4-coumarate--CoA ligase 1-like [Cucumis sativus]	gi|449439744|ref|XM_004137598.1|	928	0	PREDICTED: Cucumis sativus 4-coumarate--CoA ligase 1-like (LOC101215427), mRNA	sp|O24146|4CL2_TOBAC	821	0	4-coumarate--CoA ligase 2 OS=Nicotiana tabacum GN=4CL2 PE=2 SV=1	BS_yhfL	278	2e-74	COG0318	Acyl-CoA synthetases (AMP-forming)/AMP-acid ligases II	K01904	0	864	pop:POPTR_639764	4-coumarate--CoA ligase [EC:6.2.1.12]	GO:0009699//phenylpropanoid biosynthetic process;GO:0009611//response to wounding;GO:0009411//response to UV;GO:0009620//response to fungus	GO:0016207//4-coumarate-CoA ligase activity;GO:0000166//nucleotide binding	-	--
CL2125.Contig1_All	1021	12	81	0.5363	3.8686	2.8507	Up	5.17896e-15	1.20829e-13	gi|462424056|gb|EMJ28319.1|	46.6	3e-71	hypothetical protein PRUPE_ppa026663mg [Prunus persica]	gi|449486663|ref|XM_004157313.1|	389	1e-105	PREDICTED: Cucumis sativus probable actin-related protein 2/3 complex subunit 2-like (LOC101227415), mRNA	--	--	--	--	--	--	--	--	--	K05758	2e-66	229	pop:POPTR_803770	actin related protein 2/3 complex, subunit 2	GO:0030833//regulation of actin filament polymerization	GO:0005198//structural molecule activity	GO:0005737//cytoplasm;GO:0005885//Arp2/3 protein complex	--
Unigene2244_All	252	4	27	0.7243	5.2247	2.85069	Up	8.47302e-06	7.36759e-05	--	--	--	--	--	--	--	--	--	--	--	--	--	--	--	--	--	--	--	--	--	--	-	-	-	--
Unigene39752_All	348	4	27	0.5245	3.7834	2.85067	Up	8.47302e-06	7.36854e-05	--	--	--	--	--	--	--	--	--	--	--	--	--	--	--	--	--	--	--	--	--	--	-	-	-	--
Unigene15703_All	487	4	27	0.3748	2.7035	2.85064	Up	8.47302e-06	7.36949e-05	gi|449464642|ref|XP_004150038.1|	216.5	1e-55	PREDICTED: umecyanin-like [Cucumis sativus] >gi|449523491|ref|XP_004168757.1| PREDICTED: umecyanin-like [Cucumis sativus]	gi|449467496|ref|XM_004151411.1|	81.8	6e-13	PREDICTED: Cucumis sativus cucumber peeling cupredoxin-like (LOC101206568), mRNA >gi|449482645|ref|XM_004156311.1| PREDICTED: Cucumis sativus cucumber peeling cupredoxin-like (LOC101206568), mRNA	sp|P29602|CPC_CUCSA	91.7	2e-19	Cucumber peeling cupredoxin OS=Cucumis sativus PE=1 SV=3	--	--	--	--	--	--	--	--	--	--	-	-	-	--
Unigene10488_All	494	8	54	0.739	5.3305	2.85062	Up	1.9625e-10	3.24153e-09	--	--	--	--	--	--	--	--	--	--	--	--	--	--	--	--	--	--	--	--	--	--	-	-	-	--
Unigene28493_All	258	4	27	0.7075	5.1032	2.8506	Up	8.47302e-06	7.3657e-05	gi|218187251|gb|EEC69678.1|	84.7	4e-16	hypothetical protein OsI_39116 [Oryza sativa Indica Group]	--	--	--	--	--	--	--	--	--	--	--	--	--	K06167	2e-14	75.5	ath:AT4G03610	PhnP protein	-	GO:0016787//hydrolase activity	-	--
CL6370.Contig1_All	353	4	27	0.5171	3.7298	2.85058	Up	8.47302e-06	7.36664e-05	gi|449468051|ref|XP_004151735.1|	125.6	2e-28	PREDICTED: trans-resveratrol di-O-methyltransferase-like [Cucumis sativus]	--	--	--	--	sp|Q6VMW0|Q8OMT_MENPI	110	1e-25	8-hydroxyquercetin 8-O-methyltransferase OS=Mentha piperita GN=OMT2 PE=1 SV=1	--	--	--	--	--	K16040	1e-23	105	vvi:100233030	trans-resveratrol di-O-methyltransferase [EC:2.1.1.240]	-	GO:0008171//O-methyltransferase activity	-	--
CL8145.Contig2_All	630	11	74	0.7968	5.7278	2.84569	Up	8.32458e-14	1.78846e-12	gi|449518897|ref|XP_004166472.1|	238.4	6e-62	PREDICTED: uncharacterized protein LOC101232177 [Cucumis sativus]	gi|449518896|ref|XM_004166424.1|	515	1e-143	PREDICTED: Cucumis sativus uncharacterized LOC101232177 (LOC101232177), mRNA	--	--	--	--	--	--	--	--	--	--	--	--	--	--	-	GO:0005509//calcium ion binding	-	--
Unigene941_All	495	17	114	1.5672	11.2305	2.84116	Up	1.64455e-20	5.16032e-19	gi|315932714|gb|ADU55787.1|	207.2	8e-53	HSP23.5 [Citrullus lanatus]	gi|315932713|gb|HQ681892.1|	323	1e-85	Citrullus lanatus HSP23.5 mRNA, complete cds	sp|Q96331|HS23M_ARATH	117	3e-27	23.6 kDa heat shock protein, mitochondrial OS=Arabidopsis thaliana GN=HSP23.6 PE=2 SV=1	--	--	--	--	--	K13993	2e-23	106	vvi:100248906	HSP20 family protein	GO:0006457//protein folding;GO:0009644//response to high light intensity;GO:0034976//response to endoplasmic reticulum stress;GO:0046686//response to cadmium ion;GO:0042542//response to hydrogen peroxide;GO:0009408//response to heat	-	GO:0005739//mitochondrion	--
CL5086.Contig2_All	3049	59	395	0.883	6.3174	2.83885	Up	2.54106e-67	2.49271e-65	gi|343466177|gb|AEM42982.1|	1313.9	0	cucurbitadienol synthase [Siraitia grosvenorii]	gi|343466174|gb|HQ128566.1|	2520	0	Siraitia grosvenorii cycloartenol synthase mRNA, complete cds	sp|Q9SLP9|CAS1_LUFCY	1284	0	Cycloartenol synthase OS=Luffa cylindrica GN=CAS1 PE=1 SV=1	YHR072w	487	4e-137	COG1657	Squalene cyclase	K01853	0	1177	vvi:100243389	cycloartenol synthase [EC:5.4.99.8]	GO:0008152//metabolic process	GO:0016871//cycloartenol synthase activity	-	--
Unigene29762_All	1612	134	896	3.7933	27.1045	2.83701	Up	2.05792e-150	4.13967e-148	gi|449523529|ref|XP_004168776.1|	724.9	0	PREDICTED: aspartic proteinase nepenthesin-1-like [Cucumis sativus]	gi|449453901|ref|XM_004144647.1|	680	0	PREDICTED: Cucumis sativus aspartic proteinase nepenthesin-1-like (LOC101210935), partial mRNA	sp|Q766C3|NEP1_NEPGR	431	5e-121	Aspartic proteinase nepenthesin-1 OS=Nepenthes gracilis GN=nep1 PE=1 SV=1	--	--	--	--	--	K00924	4e-28	124	ath:AT5G22850	[EC:2.7.1.-]	GO:0010413//glucuronoxylan metabolic process;GO:0016926//protein desumoylation;GO:0000041//transition metal ion transport;GO:0010228//vegetative to reproductive phase transition of meristem;GO:0006508//proteolysis;GO:0045492//xylan biosynthetic process;GO:0050665//hydrogen peroxide biosynthetic process	GO:0004190//aspartic-type endopeptidase activity	GO:0005576//extracellular region	--
CL6143.Contig2_All	402	3	20	0.3405	2.4261	2.83291	Up	0.000149177	0.000963658	--	--	--	--	gi|449518908|ref|XM_004166430.1|	61.9	5e-07	PREDICTED: Cucumis sativus BTB/POZ domain-containing protein At3g05675-like (LOC101218872), mRNA	--	--	--	--	--	--	--	--	--	--	--	--	--	--	-	-	-	--
Unigene22453_All	214	3	20	0.6397	4.5574	2.83274	Up	0.000149177	0.000963105	--	--	--	--	--	--	--	--	--	--	--	--	--	--	--	--	--	--	--	--	--	--	-	-	-	--
Unigene40177_All	209	3	20	0.655	4.6664	2.83274	Up	0.000149177	0.000963566	--	--	--	--	--	--	--	--	--	--	--	--	--	--	--	--	--	--	--	--	--	--	-	-	-	--
Unigene2778_All	238	3	20	0.5752	4.0978	2.83271	Up	0.000149177	0.000963474	gi|449522626|ref|XP_004168327.1|	151.4	4e-36	PREDICTED: uncharacterized LOC101222074, partial [Cucumis sativus]	gi|449522625|ref|XM_004168279.1|	319	7e-85	PREDICTED: Cucumis sativus uncharacterized LOC101222074 (LOC101222074), partial mRNA	--	--	--	--	--	--	--	--	--	--	--	--	--	--	-	-	GO:0005576//extracellular region;GO:0016021//integral to membrane	--
Unigene9250_All	242	3	20	0.5657	4.0301	2.83271	Up	0.000149177	0.000963382	--	--	--	--	--	--	--	--	--	--	--	--	--	--	--	--	--	--	--	--	--	--	-	-	-	--
Unigene28578_All	608	3	20	0.2252	1.6041	2.83249	Up	0.000149177	0.00096375	gi|449489266|ref|XP_004158263.1|	62.4	5e-09	PREDICTED: thermospermine synthase ACAULIS5-like [Cucumis sativus]	gi|449489265|ref|XM_004158215.1|	91.7	8e-16	PREDICTED: Cucumis sativus thermospermine synthase ACAULIS5-like (LOC101228335), mRNA	--	--	--	--	--	--	--	--	--	--	--	--	--	--	-	-	-	--
CL676.Contig4_All	1644	3	20	0.0833	0.5932	2.83213	Up	0.000149177	0.000963197	gi|449432402|ref|XP_004133988.1|	76.6	1e-12	PREDICTED: methyltransferase-like protein 13-like [Cucumis sativus] >gi|449517108|ref|XP_004165588.1| PREDICTED: methyltransferase-like protein 13-like [Cucumis sativus]	gi|359477925|ref|XM_002263145.2|	93.7	6e-16	PREDICTED: Vitis vinifera methyltransferase-like protein 13-like (LOC100258907), mRNA	--	--	--	--	--	--	--	--	--	--	--	--	--	--	GO:0032259//methylation	GO:0008168//methyltransferase activity	-	--
CL1179.Contig6_All	2057	3	20	0.0666	0.4741	2.8316	Up	0.000149177	0.00096329	gi|449468764|ref|XP_004152091.1|	77	0	PREDICTED: 2,3-dimethylmalate lyase-like [Cucumis sativus]	gi|449468763|ref|XM_004152043.1|	1158	0	PREDICTED: Cucumis sativus 2,3-dimethylmalate lyase-like (LOC101208914), mRNA	sp|O49290|CPPM_ARATH	191	1e-48	Carboxyvinyl-carboxyphosphonate phosphorylmutase, chloroplastic OS=Arabidopsis thaliana GN=At1g77060 PE=1 SV=2	all1863	218	3e-56	COG2513	PEP phosphonomutase and related enzymes	K01637	2e-08	59.3	bdi:100841104	isocitrate lyase [EC:4.1.3.1]	GO:0008152//metabolic process	GO:0016829//lyase activity	GO:0009507//chloroplast	--
Unigene19245_All	795	38	252	2.1812	15.4572	2.82509	Up	2.5754e-43	1.64216e-41	gi|449451213|ref|XP_004143356.1|	407.9	9e-113	PREDICTED: phenylalanine ammonia-lyase-like [Cucumis sativus] >gi|449482592|ref|XP_004156338.1| PREDICTED: phenylalanine ammonia-lyase-like [Cucumis sativus]	gi|449468891|ref|XM_004152107.1|	440	1e-120	PREDICTED: Cucumis sativus phenylalanine ammonia-lyase-like (LOC101203846), mRNA	sp|O23924|PALY_DIGLA	375	2e-104	Phenylalanine ammonia-lyase OS=Digitalis lanata PE=2 SV=1	SPy2089	102	6e-22	COG2986	Histidine ammonia-lyase	K10775	5e-104	375	vvi:100251137	phenylalanine ammonia-lyase [EC:4.3.1.24]	-	-	-	--
CL2678.Contig2_All	1545	91	602	2.6878	19.0006	2.82155	Up	4.56342e-101	6.53468e-99	gi|449469643|ref|XP_004152528.1|	667.5	0	PREDICTED: BAHD acyltransferase At5g47980-like [Cucumis sativus]	gi|449515990|ref|XM_004164983.1|	315	8e-83	PREDICTED: Cucumis sativus BAHD acyltransferase At5g47980-like (LOC101216696), mRNA	sp|Q9FI40|BAHD1_ARATH	272	3e-73	BAHD acyltransferase At5g47980 OS=Arabidopsis thaliana GN=BAHD1 PE=2 SV=1	--	--	--	--	--	K13065	9e-28	123	sbi:SORBI_06g021640	shikimate O-hydroxycinnamoyltransferase [EC:2.3.1.133]	-	GO:0016746//transferase activity, transferring acyl groups	-	--
CL2339.Contig2_All	2245	5	33	0.1016	0.7168	2.81867	Up	8.99706e-07	9.34679e-06	gi|315932722|gb|ADU55791.1|	298.5	3e-79	HSP17.4 [Citrullus lanatus]	gi|315932721|gb|HQ681896.1|	535	1e-149	Citrullus lanatus HSP17.4 mRNA, complete cds	sp|P05477|HSP21_SOYBN	259	5e-69	17.9 kDa class II heat shock protein OS=Glycine max GN=HSP17.9-D PE=3 SV=1	TM0374	88.6	4e-17	COG0071	Molecular chaperone (small heat shock protein)	K13993	1e-73	276	vvi:100266315	HSP20 family protein	GO:0006457//protein folding;GO:0009644//response to high light intensity;GO:0042542//response to hydrogen peroxide;GO:0006972//hyperosmotic response;GO:0009408//response to heat	GO:0051082//unfolded protein binding	-	--
Unigene4618_All	321	5	33	0.7108	5.0131	2.81819	Up	8.99706e-07	9.34823e-06	--	--	--	--	gi|449480962|ref|XM_004155993.1|	99.6	2e-18	PREDICTED: Cucumis sativus chromodomain-helicase-DNA-binding protein 2-like (LOC101207976), mRNA	--	--	--	--	--	--	--	--	--	--	--	--	--	--	-	-	-	--
Unigene4966_All	863	10	66	0.5288	3.7293	2.81811	Up	2.42812e-12	4.69166e-11	gi|449443143|ref|XP_004139340.1|	250	3e-65	PREDICTED: multiprotein-bridging factor 1c-like [Cucumis sativus] >gi|449521076|ref|XP_004167557.1| PREDICTED: multiprotein-bridging factor 1c-like [Cucumis sativus]	gi|449521075|ref|XM_004167509.1|	214	1e-52	PREDICTED: Cucumis sativus multiprotein-bridging factor 1c-like (LOC101226552), mRNA	sp|Q9LV58|MBF1C_ARATH	231	3e-61	Multiprotein-bridging factor 1c OS=Arabidopsis thaliana GN=MBF1C PE=1 SV=1	SPBC83.17	87	4e-17	COG1813	Predicted transcription factor, homolog of eukaryotic MBF1	K03627	4e-65	246	vvi:100249249	putative transcription factor	GO:0034976//response to endoplasmic reticulum stress;GO:0009414//response to water deprivation;GO:0006457//protein folding;GO:0009408//response to heat;GO:0009737//response to abscisic acid stimulus;GO:0045893//positive regulation of transcription, DNA-dependent;GO:0009644//response to high light intensity;GO:0042542//response to hydrogen peroxide;GO:0009873//ethylene mediated signaling pathway	GO:0043565//sequence-specific DNA binding;GO:0003700//sequence-specific DNA binding transcription factor activity;GO:0003713//transcription coactivator activity	GO:0005730//nucleolus	--
Unigene24412_All	1305	1045	6874	36.5414	256.861	2.81338	Up	0	0	gi|449469971|ref|XP_004152692.1|	526.2	4e-148	PREDICTED: isoflavone reductase homolog P3-like [Cucumis sativus] >gi|449496099|ref|XP_004160039.1| PREDICTED: isoflavone reductase homolog P3-like [Cucumis sativus]	gi|449496098|ref|XM_004159991.1|	490	1e-135	PREDICTED: Cucumis sativus isoflavone reductase homolog P3-like (LOC101225985), mRNA	sp|E1U332|ALL12_OLEEU	485	3e-137	Isoflavone reductase-like protein OS=Olea europaea PE=1 SV=1	all4752	61.2	4e-09	COG0702	Predicted nucleoside-diphosphate-sugar epimerases	K00224	3e-133	473	aly:ARALYDRAFT_476671	[EC:1.3.1.-]	GO:0055114//oxidation-reduction process	GO:0016491//oxidoreductase activity;GO:0000166//nucleotide binding	GO:0005737//cytoplasm	--
CL409.Contig5_All	2128	7	46	0.1501	1.0541	2.81202	Up	5.84012e-09	8.24239e-08	gi|449527717|ref|XP_004170856.1|	216.5	0	PREDICTED: cytochrome P450 734A1-like [Cucumis sativus]	gi|343466180|gb|HQ128569.1|	961	0	Siraitia grosvenorii cytochrome P450 (P450-3) mRNA, complete cds	sp|O48786|C734A_ARATH	235	2e-96	Cytochrome P450 734A1 OS=Arabidopsis thaliana GN=CYP734A1 PE=2 SV=1	AGc2890	94.7	1e-36	COG2124	Cytochrome P450	K15639	5e-96	235	ath:AT2G26710	cytochrome P450, family 734, subfamily A, polypeptide 1 (PHYB activation tagged suppressor 1) [EC:1.14.-.-]	-	-	-	--
CL4915.Contig1_All	1013	95	623	4.2795	29.99	2.80897	Up	4.82996e-104	7.06606e-102	gi|449441900|ref|XP_004138720.1|	372.1	8e-102	PREDICTED: adenine phosphoribosyltransferase 2-like [Cucumis sativus] >gi|449527059|ref|XP_004170530.1| PREDICTED: adenine phosphoribosyltransferase 2-like [Cucumis sativus]	gi|449527058|ref|XM_004170482.1|	914	0	PREDICTED: Cucumis sativus adenine phosphoribosyltransferase 2-like (LOC101231851), mRNA	sp|Q42563|APT2_ARATH	297	6e-81	Adenine phosphoribosyltransferase 2 OS=Arabidopsis thaliana GN=APT2 PE=2 SV=1	apt	182	8e-46	COG0503	Adenine/guanine phosphoribosyltransferases and related PRPP-binding proteins	K00759	9e-97	351	pop:POPTR_669073	adenine phosphoribosyltransferase [EC:2.4.2.7]	GO:0009116//nucleoside metabolic process;GO:0006168//adenine salvage	GO:0015114//phosphate ion transmembrane transporter activity;GO:0003999//adenine phosphoribosyltransferase activity	GO:0005829//cytosol;GO:0005794//Golgi apparatus;GO:0005886//plasma membrane	--
Unigene19604_All	1132	9	59	0.3628	2.5416	2.80849	Up	3.93676e-11	6.90225e-10	gi|449521553|ref|XP_004167794.1|	208.8	1e-52	PREDICTED: proline-rich receptor-like protein kinase PERK9-like [Cucumis sativus]	gi|449521552|ref|XM_004167746.1|	492	1e-136	PREDICTED: Cucumis sativus proline-rich receptor-like protein kinase PERK9-like (LOC101226170), mRNA	sp|Q9SX31|PERK9_ARATH	150	2e-36	Proline-rich receptor-like protein kinase PERK9 OS=Arabidopsis thaliana GN=PERK9 PE=2 SV=1	--	--	--	--	--	K04733	1e-14	79.3	smo:SELMODRAFT_159261	interleukin-1 receptor-associated kinase 4 [EC:2.7.11.1]	GO:0051510//regulation of unidimensional cell growth;GO:0006468//protein phosphorylation	GO:0004674//protein serine/threonine kinase activity;GO:0005524//ATP binding	GO:0005886//plasma membrane	--
CL2345.Contig2_All	1192	90	589	3.4454	24.0956	2.80603	Up	2.37476e-98	3.32314e-96	gi|449433892|ref|XP_004134730.1|	309.7	6e-83	PREDICTED: F-box protein SKIP27-like [Cucumis sativus]	gi|449433891|ref|XM_004134682.1|	434	1e-119	PREDICTED: Cucumis sativus F-box protein SKIP27-like (LOC101211140), mRNA	sp|O65416|SKI27_ARATH	135	5e-32	F-box protein SKIP27 OS=Arabidopsis thaliana GN=SKIP27 PE=1 SV=2	--	--	--	--	--	--	--	--	--	--	-	-	-	--
Unigene26341_All	1394	131	856	4.2883	29.944	2.80379	Up	5.22742e-142	9.92461e-140	gi|449460313|ref|XP_004147890.1|	722.6	0	PREDICTED: BAHD acyltransferase DCR-like [Cucumis sativus]	gi|449460312|ref|XM_004147842.1|	513	1e-142	PREDICTED: Cucumis sativus BAHD acyltransferase DCR-like (LOC101209472), mRNA	sp|Q9FF86|DCR_ARATH	199	4e-51	BAHD acyltransferase DCR OS=Arabidopsis thaliana GN=DCR PE=2 SV=1	--	--	--	--	--	K13065	4e-28	124	aly:ARALYDRAFT_892660	shikimate O-hydroxycinnamoyltransferase [EC:2.3.1.133]	-	GO:0016747//transferase activity, transferring acyl groups other than amino-acyl groups	GO:0005737//cytoplasm	--
Unigene31418_All	938	19	124	0.9243	6.4464	2.80206	Up	6.92924e-22	2.33121e-20	gi|449451465|ref|XP_004143482.1|	609.4	2e-173	PREDICTED: L-ascorbate oxidase-like [Cucumis sativus] >gi|449532208|ref|XP_004173074.1| PREDICTED: L-ascorbate oxidase-like [Cucumis sativus]	gi|4049409|emb|Y10225.1|	664	0	C.melo ao2 gene, partial	sp|P14133|ASO_CUCSA	346	1e-95	L-ascorbate oxidase OS=Cucumis sativus PE=1 SV=1	SPAC1F7.08	99.8	6e-21	COG2132	Putative multicopper oxidases	K00423	2e-96	350	rcu:RCOM_0657480	L-ascorbate oxidase [EC:1.10.3.3]	GO:0055114//oxidation-reduction process	GO:0005507//copper ion binding;GO:0008447//L-ascorbate oxidase activity	GO:0005576//extracellular region	--
CL3804.Contig1_All	448	19	124	1.9353	13.4972	2.80203	Up	6.92924e-22	2.33237e-20	gi|449441666|ref|XP_004138603.1|	148.7	2e-35	PREDICTED: uncharacterized protein LOC101207576 [Cucumis sativus] >gi|449490315|ref|XP_004158568.1| PREDICTED: uncharacterized protein LOC101223482 [Cucumis sativus]	gi|449441665|ref|XM_004138555.1|	155	5e-35	PREDICTED: Cucumis sativus uncharacterized LOC101207576 (LOC101207576), mRNA >gi|449490314|ref|XM_004158520.1| PREDICTED: Cucumis sativus uncharacterized LOC101223482 (LOC101223482), mRNA	--	--	--	--	--	--	--	--	--	--	--	--	--	--	-	-	-	--
CL2678.Contig1_All	1486	16	104	0.4913	3.4128	2.79628	Up	1.52726e-18	4.33904e-17	gi|449469643|ref|XP_004152528.1|	656	0	PREDICTED: BAHD acyltransferase At5g47980-like [Cucumis sativus]	gi|449515990|ref|XM_004164983.1|	301	1e-78	PREDICTED: Cucumis sativus BAHD acyltransferase At5g47980-like (LOC101216696), mRNA	sp|Q9FI40|BAHD1_ARATH	271	6e-73	BAHD acyltransferase At5g47980 OS=Arabidopsis thaliana GN=BAHD1 PE=2 SV=1	--	--	--	--	--	K13065	9e-28	123	sbi:SORBI_06g021640	shikimate O-hydroxycinnamoyltransferase [EC:2.3.1.133]	-	GO:0016740//transferase activity	-	--
Unigene18426_All	260	4	26	0.702	4.8764	2.79627	Up	1.5411e-05	0.00012661	gi|428169810|gb|EKX38740.1|	50.8	7e-06	hypothetical protein GUITHDRAFT_76875, partial [Guillardia theta CCMP2712]	gi|328751894|gb|AC244290.3|	95.6	2e-17	Solanum lycopersicum strain Heinz 1706 chromosome 10 clone hba-21m16 map 10, complete sequence	sp|Q6DBM8|MTPB_ARATH	47.8	1e-06	Metal tolerance protein B OS=Arabidopsis thaliana GN=MTPB PE=2 SV=1	--	--	--	--	--	K03189	9e-06	46.6	gmx:547551	urease accessory protein	-	-	-	--
Unigene3021_All	316	4	26	0.5776	4.0122	2.79625	Up	1.5411e-05	0.000126625	--	--	--	--	--	--	--	--	--	--	--	--	--	--	--	--	--	--	--	--	--	--	-	-	-	--
Unigene24945_All	264	18	117	3.1113	21.6113	2.7962	Up	1.09494e-20	3.47282e-19	gi|449451213|ref|XP_004143356.1|	72.4	2e-12	PREDICTED: phenylalanine ammonia-lyase-like [Cucumis sativus] >gi|449482592|ref|XP_004156338.1| PREDICTED: phenylalanine ammonia-lyase-like [Cucumis sativus]	gi|449533906|ref|XM_004173864.1|	91.7	3e-16	PREDICTED: Cucumis sativus phenylalanine ammonia-lyase-like (LOC101224903), partial mRNA	sp|P45730|PALY_POPTR	65.9	5e-12	Phenylalanine ammonia-lyase OS=Populus trichocarpa GN=PAL PE=2 SV=1	--	--	--	--	--	K10775	7e-11	63.5	pop:POPTR_667815	phenylalanine ammonia-lyase [EC:4.3.1.24]	GO:0006979//response to oxidative stress;GO:0010224//response to UV-B;GO:0009800//cinnamic acid biosynthetic process;GO:0006559//L-phenylalanine catabolic process;GO:0009555//pollen development;GO:0046274//lignin catabolic process;GO:0009819//drought recovery;GO:0046244//salicylic acid catabolic process;GO:0080167//response to karrikin	GO:0045548//phenylalanine ammonia-lyase activity	GO:0005737//cytoplasm	--
Unigene16252_All	288	4	26	0.6338	4.4023	2.79616	Up	1.5411e-05	0.000126594	--	--	--	--	gi|449493630|ref|XM_004159336.1|	115	3e-23	PREDICTED: Cucumis sativus glucan endo-1,3-beta-glucosidase 11-like (LOC101223630), mRNA	--	--	--	--	--	--	--	--	--	--	--	--	--	--	-	-	-	--
Unigene15806_All	243	4	26	0.7512	5.2175	2.79609	Up	1.5411e-05	0.00012664	--	--	--	--	--	--	--	--	--	--	--	--	--	--	--	--	--	--	--	--	--	--	-	-	-	--
Unigene11953_All	525	8	52	0.6954	4.8299	2.79608	Up	6.42034e-10	1.00964e-08	--	--	--	--	--	--	--	--	--	--	--	--	--	--	--	--	--	--	--	--	--	--	-	-	-	--
CL6003.Contig3_All	772	27	175	1.596	11.054	2.79204	Up	3.48546e-30	1.5896e-28	gi|449445624|ref|XP_004140572.1|	344.4	1e-93	PREDICTED: cellulose synthase A catalytic subunit 4 [UDP-forming]-like [Cucumis sativus] >gi|449487357|ref|XP_004157586.1| PREDICTED: cellulose synthase A catalytic subunit 4 [UDP-forming]-like [Cucumis sativus]	gi|459958132|gb|KC292202.1|	97.6	2e-17	Betula platyphylla cellulose synthase A4 (CESA4) mRNA, complete cds	sp|Q84JA6|CESA4_ARATH	225	2e-59	Cellulose synthase A catalytic subunit 4 [UDP-forming] OS=Arabidopsis thaliana GN=CESA4 PE=1 SV=1	--	--	--	--	--	K10999	5e-80	295	gmx:100781996	cellulose synthase A [EC:2.4.1.12]	GO:0006952//defense response;GO:0009987//cellular process;GO:0051707//response to other organism	GO:0016757//transferase activity, transferring glycosyl groups	GO:0016020//membrane	--
Unigene4825_All	303	34	220	5.1205	35.4061	2.78964	Up	1.59046e-37	8.9956e-36	gi|462400790|gb|EMJ06347.1|	87.8	5e-17	hypothetical protein PRUPE_ppa005318mg [Prunus persica]	gi|380863867|gb|JQ413184.1|	91.7	4e-16	Erythroxylum coca BAHD acyltransferase (BAHD1) mRNA, complete cds	--	--	--	--	--	--	--	--	--	--	--	--	--	--	GO:0080167//response to karrikin	GO:0016747//transferase activity, transferring acyl groups other than amino-acyl groups	GO:0005737//cytoplasm	--
CL6118.Contig2_All	1759	7	45	0.1816	1.2475	2.7802	Up	1.05484e-08	1.44733e-07	gi|449441300|ref|XP_004138420.1|	731.5	0	PREDICTED: dual specificity protein kinase pom1-like [Cucumis sativus] >gi|449533074|ref|XP_004173502.1| PREDICTED: dual specificity protein kinase pom1-like [Cucumis sativus]	gi|449533073|ref|XM_004173454.1|	1415	0	PREDICTED: Cucumis sativus dual specificity protein kinase pom1-like (LOC101203383), mRNA	sp|P51566|AFC1_ARATH	166	4e-41	Serine/threonine-protein kinase AFC1 OS=Arabidopsis thaliana GN=AFC1 PE=2 SV=2	YBL016w	112	3e-24	COG0515	Serine/threonine protein kinase	K08825	1e-55	216	vcn:VOLCADRAFT_61790	dual-specificity tyrosine-(Y)-phosphorylation regulated kinase [EC:2.7.12.1]	GO:0046777//protein autophosphorylation	GO:0005524//ATP binding;GO:0004674//protein serine/threonine kinase activity	GO:0005737//cytoplasm;GO:0005634//nucleus	--
Unigene25698_All	406	12	77	1.3488	9.2483	2.77751	Up	5.48108e-14	1.19311e-12	--	--	--	--	--	--	--	--	--	--	--	--	--	--	--	--	--	--	--	--	--	--	-	-	-	--
Unigene24103_All	283	22	141	3.5474	24.2958	2.77587	Up	1.84534e-24	6.9562e-23	--	--	--	--	--	--	--	--	--	--	--	--	--	--	--	--	--	--	--	--	--	--	-	-	-	--
Unigene23236_All	670	32	205	2.1795	14.9203	2.77521	Up	6.94296e-35	3.63492e-33	gi|449519492|ref|XP_004166769.1|	56.2	5e-07	PREDICTED: LOW QUALITY PROTEIN: sister chromatid cohesion protein PDS5 homolog A-like [Cucumis sativus]	gi|449519491|ref|XM_004166721.1|	77.8	1e-11	PREDICTED: Cucumis sativus sister chromatid cohesion protein PDS5 homolog A-like (LOC101227688), mRNA	--	--	--	--	--	--	--	--	--	--	--	--	--	--	-	-	-	--
Unigene12258_All	268	5	32	0.8514	5.8226	2.77375	Up	1.62938e-06	1.61384e-05	--	--	--	--	--	--	--	--	--	--	--	--	--	--	--	--	--	--	--	--	--	--	-	-	-	--
Unigene27120_All	446	32	204	3.2741	22.3046	2.76817	Up	1.24413e-34	6.48838e-33	--	--	--	--	gi|449450284|ref|XM_004142846.1|	63.9	1e-07	PREDICTED: Cucumis sativus tetratricopeptide repeat protein 7B-like (LOC101209448), mRNA >gi|449482715|ref|XM_004156334.1| PREDICTED: Cucumis sativus tetratricopeptide repeat protein 7B-like (LOC101209448), mRNA	--	--	--	--	--	--	--	--	--	--	--	--	--	--	-	-	-	--
Unigene23338_All	1176	56	356	2.173	14.7619	2.76412	Up	3.56588e-59	3.06634e-57	gi|147790068|emb|CAN75990.1|	195.7	1e-48	hypothetical protein VITISV_012195 [Vitis vinifera]	--	--	--	--	sp|Q6NMR8|FAF3_ARATH	139	2e-33	Protein FANTASTIC FOUR 3 OS=Arabidopsis thaliana GN=FAF3 PE=2 SV=1	--	--	--	--	--	--	--	--	--	--	-	-	-	--
Unigene12909_All	469	20	127	1.946	13.2047	2.76247	Up	4.56748e-22	1.55444e-20	gi|62241063|dbj|BAD93688.1|	155.6	2e-37	glucosyltransferase [Nicotiana tabacum]	gi|156138796|dbj|AB294390.1|	60	2e-06	Dianthus caryophyllus DcS6B11 gene for tetrahydroxychalcone glucosyltransferase, complete cds	sp|Q9SCP5|U73C7_ARATH	139	7e-34	UDP-glycosyltransferase 73C7 OS=Arabidopsis thaliana GN=UGT73C7 PE=2 SV=1	--	--	--	--	--	K13496	1e-34	143	aly:ARALYDRAFT_485691	UDP-glucosyl transferase 73C [EC:2.4.1.-]	-	GO:0016758//transferase activity, transferring hexosyl groups	-	--
Unigene9300_All	208	6	38	1.3163	8.9088	2.75874	Up	1.74974e-07	2.04467e-06	--	--	--	--	--	--	--	--	--	--	--	--	--	--	--	--	--	--	--	--	--	--	-	-	-	--
Unigene24735_All	277	9	57	1.4827	10.0345	2.75867	Up	1.27761e-10	2.13849e-09	--	--	--	--	gi|147782871|emb|AM457500.2|	60	1e-06	Vitis vinifera contig VV78X100404.2, whole genome shotgun sequence	--	--	--	--	--	--	--	--	--	--	--	--	--	--	-	-	-	--
CL429.Contig1_All	1470	185	1163	5.7429	38.5799	2.748	Up	3.47576e-188	8.63688e-186	gi|449457510|ref|XP_004146491.1|	583.6	3e-165	PREDICTED: peroxidase 72-like [Cucumis sativus] >gi|449521245|ref|XP_004167640.1| PREDICTED: peroxidase 72-like [Cucumis sativus]	gi|449457509|ref|XM_004146443.1|	777	0	PREDICTED: Cucumis sativus peroxidase 72-like (LOC101223204), mRNA >gi|449521244|ref|XM_004167592.1| PREDICTED: Cucumis sativus peroxidase 72-like (LOC101228953), mRNA	sp|Q9FJZ9|PER72_ARATH	516	2e-146	Peroxidase 72 OS=Arabidopsis thaliana GN=PER72 PE=1 SV=1	--	--	--	--	--	K00430	1e-153	541	vvi:100245432	peroxidase [EC:1.11.1.7]	GO:0055114//oxidation-reduction process;GO:0006979//response to oxidative stress	GO:0020037//heme binding;GO:0046872//metal ion binding;GO:0004601//peroxidase activity	GO:0005576//extracellular region	--
Unigene32223_All	369	7	44	0.8657	5.8147	2.74777	Up	1.90015e-08	2.51724e-07	--	--	--	--	--	--	--	--	--	--	--	--	--	--	--	--	--	--	--	--	--	--	-	-	-	--
Unigene12927_All	325	7	44	0.9829	6.6019	2.74776	Up	1.90015e-08	2.51773e-07	--	--	--	--	--	--	--	--	--	--	--	--	--	--	--	--	--	--	--	--	--	--	-	-	-	--
Unigene23481_All	1058	21	132	0.9058	6.084	2.74776	Up	9.31318e-23	3.24971e-21	--	--	--	--	gi|47900730|gb|AC149302.1|	63.9	3e-07	Solanum demissum chromosome 11 clone PGEC400L14, complete sequence	--	--	--	--	--	--	--	--	--	--	--	--	--	--	-	-	-	--
CL5758.Contig1_All	685	8	50	0.5329	3.5594	2.7397	Up	2.081e-09	3.08044e-08	gi|449449202|ref|XP_004142354.1|	269.2	4e-71	PREDICTED: folylpolyglutamate synthase-like [Cucumis sativus] >gi|449492689|ref|XP_004159072.1| PREDICTED: folylpolyglutamate synthase-like [Cucumis sativus]	gi|449492688|ref|XM_004159024.1|	472	1e-130	PREDICTED: Cucumis sativus folylpolyglutamate synthase-like (LOC101226653), mRNA	sp|F4K2A1|FPGS1_ARATH	156	1e-38	Folylpolyglutamate synthase OS=Arabidopsis thaliana GN=FPGS1 PE=1 SV=1	--	--	--	--	--	K01930	4e-57	219	pop:POPTR_567359	folylpolyglutamate synthase [EC:6.3.2.17]	GO:0048767//root hair elongation;GO:0010449//root meristem growth;GO:0006730//one-carbon metabolic process;GO:0046901//tetrahydrofolylpolyglutamate biosynthetic process	GO:0004326//tetrahydrofolylpolyglutamate synthase activity;GO:0005524//ATP binding	GO:0005829//cytosol;GO:0009570//chloroplast stroma	--
Unigene5935_All	236	4	25	0.7734	5.1657	2.73968	Up	2.79112e-05	0.00021639	--	--	--	--	--	--	--	--	--	--	--	--	--	--	--	--	--	--	--	--	--	--	-	-	-	--
Unigene9390_All	268	4	25	0.6811	4.5489	2.73958	Up	2.79112e-05	0.000216465	--	--	--	--	--	--	--	--	--	--	--	--	--	--	--	--	--	--	--	--	--	--	-	-	-	--
Unigene15119_All	452	8	50	0.8077	5.3942	2.73952	Up	2.081e-09	3.08111e-08	gi|449478217|ref|XP_004155253.1|	271.9	2e-72	PREDICTED: LOW QUALITY PROTEIN: probable serine/threonine-protein kinase WNK4-like [Cucumis sativus]	gi|449478216|ref|XM_004155205.1|	595	1e-167	PREDICTED: Cucumis sativus probable serine/threonine-protein kinase WNK4-like (LOC101204101), mRNA	sp|Q8LST2|WNK7_ARATH	174	1e-44	Probable serine/threonine-protein kinase WNK7 OS=Arabidopsis thaliana GN=WNK7 PE=2 SV=1	--	--	--	--	--	K08867	3e-41	165	smo:SELMODRAFT_134163	WNK lysine deficient protein kinase [EC:2.7.11.1]	GO:0000186//activation of MAPKK activity;GO:0010228//vegetative to reproductive phase transition of meristem	GO:0004709//MAP kinase kinase kinase activity;GO:0005524//ATP binding	-	--
CL300.Contig3_All	2113	4	25	0.0864	0.577	2.73947	Up	2.79112e-05	0.00021644	gi|449450856|ref|XP_004143178.1|	798.9	0	PREDICTED: probable galacturonosyltransferase 15-like [Cucumis sativus]	gi|449450855|ref|XM_004143130.1|	1241	0	PREDICTED: Cucumis sativus probable galacturonosyltransferase 15-like (LOC101217748), mRNA	sp|Q8L4B0|GAUTF_ARATH	594	7e-170	Probable galacturonosyltransferase 15 OS=Arabidopsis thaliana GN=GAUT15 PE=2 SV=1	BS_gspA	52.8	2e-06	COG1442	Lipopolysaccharide biosynthesis proteins, LPS:glycosyltransferases	K13648	0	673	vvi:100259182	alpha-1,4-galacturonosyltransferase [EC:2.4.1.43]	GO:0016051//carbohydrate biosynthetic process	GO:0047262//polygalacturonate 4-alpha-galacturonosyltransferase activity	GO:0005794//Golgi apparatus	--
CL2813.Contig4_All	866	4	25	0.2108	1.4077	2.73939	Up	2.79112e-05	0.000216415	gi|356511746|ref|XP_003524584.1|	60.1	1e-47	PREDICTED: 3-ketodihydrosphingosine reductase-like [Glycine max]	gi|449512916|ref|XM_004164129.1|	252	5e-64	PREDICTED: Cucumis sativus NADP-dependent L-serine/L-allo-threonine dehydrogenase YdfG-like (LOC101218219), mRNA	--	--	--	--	--	--	--	--	--	--	--	--	--	--	GO:0055114//oxidation-reduction process	GO:0016491//oxidoreductase activity;GO:0000166//nucleotide binding	-	--
Unigene13748_All	1188	161	1003	6.1843	41.1702	2.73492	Up	1.01237e-161	2.17223e-159	gi|449439817|ref|XP_004137682.1|	334.3	2e-90	PREDICTED: uncharacterized protein LOC101203459 [Cucumis sativus]	gi|449530202|ref|XM_004172037.1|	266	5e-68	PREDICTED: Cucumis sativus uncharacterized LOC101229726 (LOC101229726), mRNA	--	--	--	--	--	--	--	--	--	--	--	--	--	--	-	-	-	--
Unigene20165_All	1485	31	193	0.9526	6.3377	2.73402	Up	1.98487e-32	9.70031e-31	gi|462409434|gb|EMJ14768.1|	547.7	1e-154	hypothetical protein PRUPE_ppa015744mg [Prunus persica]	gi|470118301|ref|XM_004295222.1|	262	1e-66	PREDICTED: Fragaria vesca subsp. vesca uncharacterized LOC101297334 (LOC101297334), mRNA	--	--	--	--	--	--	--	--	--	--	--	--	--	--	-	-	-	--
Unigene39780_All	322	9	56	1.2755	8.4807	2.73312	Up	2.29414e-10	3.7663e-09	--	--	--	--	--	--	--	--	--	--	--	--	--	--	--	--	--	--	--	--	--	--	-	-	-	--
Unigene17091_All	1205	74	460	2.8024	18.6153	2.73175	Up	4.94296e-75	5.3199e-73	gi|449437878|ref|XP_004136717.1|	422.2	9e-117	PREDICTED: uncharacterized protein LOC101219702 [Cucumis sativus] >gi|449501194|ref|XP_004161303.1| PREDICTED: uncharacterized LOC101219702 [Cucumis sativus]	gi|449437877|ref|XM_004136669.1|	250	3e-63	PREDICTED: Cucumis sativus uncharacterized LOC101219702 (LOC101219702), mRNA >gi|449501193|ref|XM_004161255.1| PREDICTED: Cucumis sativus uncharacterized LOC101219702 (LOC101219702), mRNA	sp|Q9FJK3|AGL80_ARATH	142	5e-34	Agamous-like MADS-box protein AGL80 OS=Arabidopsis thaliana GN=AGL80 PE=1 SV=1	--	--	--	--	--	K01115	2e-07	55.1	vcn:VOLCADRAFT_99471	phospholipase D [EC:3.1.4.4]	-	-	-	--
CL3265.Contig2_All	1692	49	304	1.3215	8.7614	2.72898	Up	4.3312e-50	3.16477e-48	gi|449455154|ref|XP_004145318.1|	881.3	0	PREDICTED: uncharacterized protein LOC101204476 [Cucumis sativus]	gi|449455153|ref|XM_004145270.1|	1207	0	PREDICTED: Cucumis sativus uncharacterized LOC101204476 (LOC101204476), mRNA	--	--	--	--	--	--	--	--	--	K13667	6e-100	363	gmx:100797600	protein glucosyltransferase [EC:2.4.1.-]	-	-	-	--
Unigene10384_All	1359	35	217	1.1752	7.7864	2.72805	Up	3.44078e-36	1.87095e-34	gi|449433433|ref|XP_004134502.1|	567	2e-160	PREDICTED: UPF0481 protein At3g47200-like [Cucumis sativus] >gi|449503897|ref|XP_004162220.1| PREDICTED: UPF0481 protein At3g47200-like [Cucumis sativus]	gi|449503896|ref|XM_004162172.1|	242	8e-61	PREDICTED: Cucumis sativus UPF0481 protein At3g47200-like (LOC101228272), mRNA	sp|Q9SD53|Y3720_ARATH	161	7e-40	UPF0481 protein At3g47200 OS=Arabidopsis thaliana GN=At3g47200 PE=1 SV=1	--	--	--	--	--	--	--	--	--	--	-	-	-	--
CL5741.Contig2_All	713	10	62	0.64	4.2403	2.72802	Up	2.54254e-11	4.51637e-10	gi|307135879|gb|ADN33745.1|	327.8	1e-88	hypothetical protein [Cucumis melo subsp. melo]	gi|449511050|ref|XM_004163801.1|	448	1e-123	PREDICTED: Cucumis sativus protein IQ-DOMAIN 14-like (LOC101206628), mRNA	sp|Q9SF32|IQD1_ARATH	86.7	1e-17	Protein IQ-DOMAIN 1 OS=Arabidopsis thaliana GN=IQD1 PE=1 SV=1	--	--	--	--	--	--	--	--	--	--	GO:0010103//stomatal complex morphogenesis	GO:0005516//calmodulin binding	GO:0005634//nucleus	--
Unigene39624_All	209	5	31	1.0917	7.2329	2.728	Up	2.94018e-06	2.77974e-05	gi|1345967|sp|P48624.1|FAD3E_BRANA	64.7	5e-10	RecName: Full=Omega-3 fatty acid desaturase, endoplasmic reticulum >gi|167148|gb|AAA32994.1| linoleic acid desaturase [Brassica napus]	gi|449507794|ref|XM_004163083.1|	79.8	1e-12	PREDICTED: Cucumis sativus omega-3 fatty acid desaturase, chloroplastic-like (LOC101223135), mRNA	sp|P48624|FAD3E_BRANA	64.7	1e-11	Omega-3 fatty acid desaturase, endoplasmic reticulum OS=Brassica napus GN=FAD3 PE=2 SV=1	--	--	--	--	--	K10257	9e-11	63.2	pop:POPTR_820418	omega-3 fatty acid desaturase (delta-15 desaturase) [EC:1.14.19.-]	GO:0044710	-	-	--
CL755.Contig1_All	1361	16	99	0.5365	3.5471	2.72499	Up	2.8324e-17	7.55482e-16	gi|449450099|ref|XP_004142801.1|	550.4	2e-155	PREDICTED: cinnamoyl-CoA reductase 1-like [Cucumis sativus]	gi|449450098|ref|XM_004142753.1|	587	1e-164	PREDICTED: Cucumis sativus cinnamoyl-CoA reductase 1-like (LOC101204613), mRNA	sp|Q9SAH9|CCR2_ARATH	137	1e-32	Cinnamoyl-CoA reductase 2 OS=Arabidopsis thaliana GN=CCR2 PE=1 SV=1	L161121	60.5	7e-09	COG0451	Nucleoside-diphosphate-sugar epimerases	K09753	6e-38	156	pop:POPTR_828723	cinnamoyl-CoA reductase [EC:1.2.1.44]	GO:0009809//lignin biosynthetic process	GO:0016621//cinnamoyl-CoA reductase activity;GO:0016616//oxidoreductase activity, acting on the CH-OH group of donors, NAD or NADP as acceptor	-	--
CL4045.Contig4_All	1613	112	691	3.1686	20.8902	2.72091	Up	2.30546e-111	3.60703e-109	gi|449449982|ref|XP_004142743.1|	672.2	0	PREDICTED: UDP-glucuronic acid decarboxylase 1-like [Cucumis sativus] >gi|449483862|ref|XP_004156715.1| PREDICTED: UDP-glucuronic acid decarboxylase 1-like [Cucumis sativus]	gi|449523903|ref|XM_004168915.1|	1191	0	PREDICTED: Cucumis sativus UDP-glucuronic acid decarboxylase 1-like (LOC101219906), mRNA	sp|Q9LPG6|RHM2_ARATH	111	1e-24	Probable rhamnose biosynthetic enzyme 2 OS=Arabidopsis thaliana GN=RHM2 PE=1 SV=1	alr0657	446	4e-125	COG0451	Nucleoside-diphosphate-sugar epimerases	K01710	1e-119	428	cme:CME136C	dTDP-glucose 4,6-dehydratase [EC:4.2.1.46]	GO:0042732//D-xylose metabolic process;GO:0009225//nucleotide-sugar metabolic process	GO:0048040//UDP-glucuronate decarboxylase activity;GO:0050662//coenzyme binding;GO:0000166//nucleotide binding	GO:0005886//plasma membrane	--
CL427.Contig4_All	937	135	830	6.5747	43.1954	2.71588	Up	3.89012e-133	7.06799e-131	gi|449438307|ref|XP_004136930.1|	629	3e-179	PREDICTED: tubulin alpha-4 chain-like [Cucumis sativus] >gi|449478777|ref|XP_004155416.1| PREDICTED: tubulin alpha-4 chain-like [Cucumis sativus]	gi|449478776|ref|XM_004155368.1|	1041	0	PREDICTED: Cucumis sativus tubulin alpha-4 chain-like (LOC101213258), mRNA	sp|P33629|TBA_PRUDU	627	3e-180	Tubulin alpha chain OS=Prunus dulcis GN=TUBA PE=2 SV=1	SPBC16A3.15c	490	1e-138	COG5023	Tubulin	K07374	8e-180	627	mtr:MTR_3g110720	tubulin alpha	GO:0051258//protein polymerization;GO:0006184//GTP catabolic process;GO:0007017//microtubule-based process	GO:0003924//GTPase activity;GO:0005200//structural constituent of cytoskeleton;GO:0005525//GTP binding	GO:0005874//microtubule;GO:0005737//cytoplasm	--
CL8259.Contig1_All	837	7	43	0.3816	2.5052	2.71479	Up	3.41338e-08	4.37691e-07	gi|449454971|ref|XP_004145227.1|	495.7	3e-139	PREDICTED: endochitinase PR4-like [Cucumis sativus] >gi|449474530|ref|XP_004154205.1| PREDICTED: endochitinase PR4-like [Cucumis sativus] >gi|449506294|ref|XP_004162706.1| PREDICTED: endochitinase PR4-like [Cucumis sativus]	gi|449506293|ref|XM_004162658.1|	402	1e-109	PREDICTED: Cucumis sativus endochitinase PR4-like (LOC101228355), mRNA	sp|P27054|CHI4_PHAVU	384	5e-107	Endochitinase PR4 OS=Phaseolus vulgaris GN=CHI4 PE=2 SV=1	VC0769	67.4	3e-11	COG3979	Uncharacterized protein contain chitin-binding domain type 3	K01183	3e-120	429	vvi:100245803	chitinase [EC:3.2.1.14]	GO:0015706//nitrate transport;GO:0006032//chitin catabolic process;GO:0009626//plant-type hypersensitive response;GO:0016998//cell wall macromolecule catabolic process;GO:0005975//carbohydrate metabolic process;GO:0002679//respiratory burst involved in defense response;GO:0010262//somatic embryogenesis;GO:0010200//response to chitin;GO:0015824//proline transport;GO:0010167//response to nitrate	GO:0008061//chitin binding;GO:0004568//chitinase activity	GO:0005618//cell wall;GO:0005576//extracellular region	--
Unigene18484_All	332	7	43	0.9621	6.3158	2.71471	Up	3.41338e-08	4.37857e-07	--	--	--	--	--	--	--	--	--	--	--	--	--	--	--	--	--	--	--	--	--	--	-	-	-	--
Unigene25144_All	375	7	43	0.8518	5.5916	2.71467	Up	3.41338e-08	4.37774e-07	--	--	--	--	--	--	--	--	--	--	--	--	--	--	--	--	--	--	--	--	--	--	-	-	-	--
Unigene12844_All	224	7	43	1.426	9.3609	2.71467	Up	3.41338e-08	4.37608e-07	gi|300175972|emb|CBK22189.2|	50.4	9e-06	unnamed protein product [Blastocystis hominis]	--	--	--	--	sp|Q8H0U8|RH42_ARATH	49.3	5e-07	DEAD-box ATP-dependent RNA helicase 42 OS=Arabidopsis thaliana GN=RH42 PE=1 SV=2	--	--	--	--	--	K13091	2e-07	52.4	gmx:100802446	RNA-binding protein 39	-	-	GO:0043229//intracellular organelle	--
Unigene29895_All	935	65	399	3.1723	20.8094	2.71363	Up	7.65112e-65	7.19237e-63	gi|449470160|ref|XP_004152786.1|	464.5	1e-129	PREDICTED: probable galacturonosyltransferase-like 1-like [Cucumis sativus] >gi|449496138|ref|XP_004160051.1| PREDICTED: probable galacturonosyltransferase-like 1-like [Cucumis sativus]	gi|449470159|ref|XM_004152738.1|	396	1e-107	PREDICTED: Cucumis sativus probable galacturonosyltransferase-like 1-like (LOC101218422), mRNA >gi|449496137|ref|XM_004160003.1| PREDICTED: Cucumis sativus probable galacturonosyltransferase-like 1-like (LOC101228696), mRNA	sp|Q9LN68|GATL1_ARATH	424	5e-119	Probable galacturonosyltransferase-like 1 OS=Arabidopsis thaliana GN=GATL1 PE=2 SV=1	PM1139	49.3	9e-06	COG1442	Lipopolysaccharide biosynthesis proteins, LPS:glycosyltransferases	K13648	4e-22	103	pop:POPTR_581394	alpha-1,4-galacturonosyltransferase [EC:2.4.1.43]	GO:0009867//jasmonic acid mediated signaling pathway;GO:0010363//regulation of plant-type hypersensitive response;GO:0032504//multicellular organism reproduction;GO:0006612//protein targeting to membrane;GO:0010051//xylem and phloem pattern formation;GO:0006569//tryptophan catabolic process;GO:0010417//glucuronoxylan biosynthetic process;GO:0009684//indoleacetic acid biosynthetic process;GO:00193…	GO:0047262//polygalacturonate 4-alpha-galacturonosyltransferase activity	GO:0005783//endoplasmic reticulum	--
CL4124.Contig3_All	1597	80	490	2.2859	14.962	2.71047	Up	3.78622e-79	4.21593e-77	gi|449463394|ref|XP_004149419.1|	606.7	3e-172	PREDICTED: E3 ubiquitin-protein ligase At4g11680-like [Cucumis sativus]	gi|449463393|ref|XM_004149371.1|	1029	0	PREDICTED: Cucumis sativus E3 ubiquitin-protein ligase At4g11680-like (LOC101219675), mRNA	sp|Q93Z92|RING4_ARATH	133	3e-31	E3 ubiquitin-protein ligase At4g11680 OS=Arabidopsis thaliana GN=At4g11680 PE=2 SV=1	ECU07g0330	52.8	2e-06	COG5540	RING-finger-containing ubiquitin ligase	K13148	2e-28	125	rcu:RCOM_0598050	integrator complex subunit 11 [EC:3.1.27.-]	-	GO:0008270//zinc ion binding	-	--
Unigene18979_All	353	9	55	1.1634	7.5978	2.70723	Up	4.11018e-10	6.58613e-09	--	--	--	--	--	--	--	--	--	--	--	--	--	--	--	--	--	--	--	--	--	--	-	-	-	--
CL3982.Contig2_All	717	151	919	9.6103	62.5021	2.70125	Up	2.35212e-146	4.56832e-144	gi|449525367|ref|XP_004169689.1|	208.8	6e-53	PREDICTED: caffeoyl-CoA O-methyltransferase 5-like [Cucumis sativus]	gi|197131203|gb|EU926495.1|	287	8e-75	Linum usitatissimum cultivar Baihua caffeoyl-CoA 3-O-methyltransferase (CCoAOMTI) mRNA, complete cds	sp|Q40313|CAMT_MEDSA	198	2e-51	Caffeoyl-CoA O-methyltransferase OS=Medicago sativa GN=CCOMT PE=1 SV=1	all5179	77.8	2e-14	COG4122	Predicted O-methyltransferase	K00588	6e-51	198	aly:ARALYDRAFT_912997	caffeoyl-CoA O-methyltransferase [EC:2.1.1.104]	GO:0006598//polyamine catabolic process;GO:0009805//coumarin biosynthetic process;GO:0009611//response to wounding;GO:0032259//methylation;GO:0009963//positive regulation of flavonoid biosynthetic process;GO:0042398//cellular modified amino acid biosynthetic process;GO:0009809//lignin biosynthetic process;GO:0046686//response to cadmium ion;GO:0019344//cysteine biosynthetic process	GO:0046872//metal ion binding;GO:0042409//caffeoyl-CoA O-methyltransferase activity	GO:0005829//cytosol;GO:0005634//nucleus	--
CL1768.Contig4_All	3860	233	1418	2.7545	17.9138	2.70121	Up	8.56574e-225	2.53925e-222	gi|449460149|ref|XP_004147808.1|	1694.5	0	PREDICTED: uncharacterized protein LOC101209549 [Cucumis sativus]	gi|449460148|ref|XM_004147760.1|	3003	0	PREDICTED: Cucumis sativus uncharacterized LOC101209549 (LOC101209549), mRNA	--	--	--	--	--	--	--	--	--	--	--	--	--	--	-	-	-	--
CL2795.Contig1_All	685	13	79	0.866	5.6239	2.69913	Up	6.32892e-14	1.37413e-12	gi|449462914|ref|XP_004149180.1|	256.1	3e-67	PREDICTED: profilin-like [Cucumis sativus] >gi|449489998|ref|XP_004158480.1| PREDICTED: profilin-like [Cucumis sativus]	gi|449489997|ref|XM_004158432.1|	674	0	PREDICTED: Cucumis sativus profilin-like (LOC101218089), mRNA	sp|Q9XF38|PROF_PYRCO	233	8e-62	Profilin OS=Pyrus communis PE=1 SV=1	--	--	--	--	--	K05759	6e-61	231	pop:POPTR_548926	profilin	GO:0009826//unidimensional cell growth;GO:0008154//actin polymerization or depolymerization	GO:0003779//actin binding	GO:0005730//nucleolus;GO:0009524//phragmoplast;GO:0005886//plasma membrane;GO:0005618//cell wall;GO:0005819//spindle;GO:0009507//chloroplast	--
CL418.Contig3_All	1344	28	170	0.9507	6.1681	2.69776	Up	2.38264e-28	1.03297e-26	gi|449436187|ref|XP_004135875.1|	554.3	1e-156	PREDICTED: cinnamoyl-CoA reductase 1-like [Cucumis sativus] >gi|449491074|ref|XP_004158791.1| PREDICTED: cinnamoyl-CoA reductase 1-like [Cucumis sativus]	gi|449436186|ref|XM_004135827.1|	886	0	PREDICTED: Cucumis sativus cinnamoyl-CoA reductase 1-like (LOC101213412), mRNA	sp|Q9S9N9|CCR1_ARATH	457	6e-129	Cinnamoyl-CoA reductase 1 OS=Arabidopsis thaliana GN=CCR1 PE=1 SV=1	SPAC513.07	104	4e-22	COG0451	Nucleoside-diphosphate-sugar epimerases	K09753	5e-147	519	rcu:RCOM_0470860	cinnamoyl-CoA reductase [EC:1.2.1.44]	GO:0009409//response to cold;GO:0009809//lignin biosynthetic process;GO:0055114//oxidation-reduction process	GO:0016621//cinnamoyl-CoA reductase activity;GO:0045552//dihydrokaempferol 4-reductase activity;GO:0050662//coenzyme binding;GO:0000166//nucleotide binding	-	--
CL4146.Contig2_All	1445	25	151	0.7895	5.0957	2.69027	Up	2.84366e-25	1.1046e-23	gi|449487746|ref|XP_004157780.1|	517.7	2e-145	PREDICTED: uncharacterized protein LOC101229445 [Cucumis sativus]	gi|470126313|ref|XM_004299085.1|	367	2e-98	PREDICTED: Fragaria vesca subsp. vesca uncharacterized LOC101310124 (LOC101310124), mRNA	sp|Q8LPH6|MYB86_ARATH	251	6e-67	Transcription factor MYB86 OS=Arabidopsis thaliana GN=MYB86 PE=2 SV=1	ECU11g1690	112	2e-24	COG5147	Myb superfamily proteins, including transcription factors and mRNA splicing factors	K09422	2e-126	450	pop:POPTR_575224	myb proto-oncogene protein, plant	-	GO:0005488//binding	-	--
Unigene8556_All	453	7	42	0.7051	4.5212	2.68081	Up	6.11404e-08	7.59078e-07	--	--	--	--	--	--	--	--	--	--	--	--	--	--	--	--	--	--	--	--	--	--	-	-	-	--
Unigene5841_All	351	4	24	0.52	3.3343	2.6808	Up	5.03216e-05	0.000367656	gi|449468718|ref|XP_004152068.1|	221.9	2e-57	PREDICTED: WD repeat-containing protein 26-like [Cucumis sativus] >gi|449528106|ref|XP_004171047.1| PREDICTED: WD repeat-containing protein 26-like [Cucumis sativus]	gi|449468717|ref|XM_004152020.1|	482	1e-133	PREDICTED: Cucumis sativus WD repeat-containing protein 26-like (LOC101202807), mRNA	--	--	--	--	--	--	--	--	--	--	--	--	--	--	-	-	-	--
Unigene38082_All	233	5	30	0.9792	6.2786	2.68077	Up	5.28532e-06	4.78475e-05	gi|449466498|ref|XP_004150963.1|	110.5	8e-24	PREDICTED: auxin-induced protein 5NG4-like, partial [Cucumis sativus]	gi|449466497|ref|XM_004150915.1|	127	5e-27	PREDICTED: Cucumis sativus auxin-induced protein 5NG4-like (LOC101222036), partial mRNA	sp|O80638|WTR14_ARATH	69.7	4e-13	WAT1-related protein At2g39510 OS=Arabidopsis thaliana GN=At2g39510 PE=2 SV=1	--	--	--	--	--	--	--	--	--	--	-	-	-	--
Unigene19641_All	374	11	66	1.3421	8.6054	2.68075	Up	9.0349e-12	1.66756e-10	gi|449451016|ref|XP_004143258.1|	152.1	2e-36	PREDICTED: phenylalanine ammonia-lyase-like [Cucumis sativus] >gi|449482466|ref|XP_004156291.1| PREDICTED: phenylalanine ammonia-lyase-like [Cucumis sativus]	gi|449451212|ref|XM_004143308.1|	234	5e-59	PREDICTED: Cucumis sativus phenylalanine ammonia-lyase-like (LOC101222092), mRNA >gi|449482591|ref|XM_004156290.1| PREDICTED: Cucumis sativus phenylalanine ammonia-lyase-like (LOC101226278), mRNA	sp|Q04593|PAL2_PEA	132	4e-32	Phenylalanine ammonia-lyase 2 OS=Pisum sativum GN=PAL2 PE=2 SV=1	--	--	--	--	--	K10775	2e-32	134	mtr:MTR_1g064090	phenylalanine ammonia-lyase [EC:4.3.1.24]	GO:0009800//cinnamic acid biosynthetic process;GO:0006559//L-phenylalanine catabolic process	GO:0045548//phenylalanine ammonia-lyase activity	GO:0005737//cytoplasm	--
Unigene31472_All	248	4	24	0.736	4.7191	2.68073	Up	5.03216e-05	0.000367418	--	--	--	--	--	--	--	--	--	--	--	--	--	--	--	--	--	--	--	--	--	--	-	-	-	--
Unigene6164_All	377	5	30	0.6052	3.8804	2.68072	Up	5.28532e-06	4.78219e-05	gi|449432516|ref|XP_004134045.1|	90.9	6e-18	PREDICTED: probable actin-related protein 2/3 complex subunit 2-like [Cucumis sativus] >gi|449486664|ref|XP_004157361.1| PREDICTED: probable actin-related protein 2/3 complex subunit 2-like [Cucumis sativus]	gi|449486663|ref|XM_004157313.1|	137	9e-30	PREDICTED: Cucumis sativus probable actin-related protein 2/3 complex subunit 2-like (LOC101227415), mRNA	--	--	--	--	--	--	--	--	--	K05758	2e-16	82.4	vvi:100258050	actin related protein 2/3 complex, subunit 2	GO:0030833//regulation of actin filament polymerization	GO:0005198//structural molecule activity	GO:0005737//cytoplasm;GO:0005885//Arp2/3 protein complex	--
Unigene4645_All	344	17	102	2.2551	14.4591	2.68071	Up	1.81654e-17	4.89352e-16	--	--	--	--	--	--	--	--	--	--	--	--	--	--	--	--	--	--	--	--	--	--	-	-	-	--
Unigene15719_All	269	5	30	0.8482	5.4384	2.68071	Up	5.28532e-06	4.78411e-05	--	--	--	--	--	--	--	--	--	--	--	--	--	--	--	--	--	--	--	--	--	--	-	-	-	--
Unigene9240_All	420	4	24	0.4346	2.7865	2.68069	Up	5.03216e-05	0.000367497	--	--	--	--	--	--	--	--	--	--	--	--	--	--	--	--	--	--	--	--	--	--	-	-	-	--
Unigene39748_All	247	4	24	0.739	4.7382	2.68069	Up	5.03216e-05	0.000367378	--	--	--	--	--	--	--	--	--	--	--	--	--	--	--	--	--	--	--	--	--	--	-	-	-	--
[truncated: 4,269 more rows]

## Sheet: P vs CK
Supplementary Table S4. The differentially expressed genes in ovaries at 3 days after artificial pollination with respect to 0 DAA in S. grosvenorii.
geneID(8985)	geneLength	0d_rawfragments(21913960)	P3d_rawfragments(21418270)	0d_FPKM	P3d_FPKM	log2 Ratio(P3d/0d)	Up-Down-Regulation(P3d/0d)	P-value	FDR	Nr-ID	Nr-Score	Nr-Evalue	Nr-annotation	Nt-ID	Nt-Score	Nt-Evalue	Nt-annotation	Swissprot-ID	Swissprot-Score	Swissprot-Evalue	Swissprot-annotation	COG-Protein-or-Domain	COG-Score	COG-Evalue	COG-ID	COG-Function-Description	KO_id	KEGG-Evalue	KEGG-Score	KEGG-Gene	ko_definition	GO-BiologicalProcess	GO-MolecularFunction	Go-CellularComponent	Pathway ID//Pathway
[truncated: 8,985 more rows]
